# Supplementary material for: The Amyloid Plaque Proteome in Early Onset Alzheimer’s Disease and Down Syndrome
Source: Research Square preprint supplement (doi:10.21203/rs.3.rs-1316035/v1), 2022-02-08
Supplement: Supplementary file 1 [file 7bc46f6521f5b64dd88f89d2.xlsx]

## Sheet: Table 1 - Imputed Data
Supplementary Table 1 - Total Imputed Dataset
Imputed LC-MS dataset of proteins present in plaques and neighboring non-plaque tissue in Down Syndrome (DS) and early onset AD (EOAD). Data shows Log2 transformed LFQ intensities with missing values imputed from normal distribution. Columns labelled “In at least 3 cases/group” indicate proteins included after filtering in statistical analyses. To be included a protein had to be present in at lea…
					Down Syndrome Plaque vs Non-Plaque																		EOAD Plaque vs Non-Plaque																		Comparison with Previous datasets
Uniprot ID	Majority Gene ID	All Gene IDs	Name	Peptides	DS_np_01	DS_np_02	DS_np_03	DS_np_04	DS_np_05	Average intensity in DS_NP	DS_p_01	DS_p_02	DS_p_03	DS_p_04	DS_p_05	Average intensity in DS_P	In at least 3 cases/group	pValue_DS	Difference_DS	Fold change_DS	Significant_DS	Significantly enriched in DS plaques	eoAD_np_01	eoAD_np_02	eoAD_np_03	eoAD_np_04	eoAD_np_05	Average intensity in EOAD_NP	eoAD_p_01	eoAD_p_02	eoAD_p_03	eoAD_p_04	eoAD_p_05	Average intensity in EOAD_P	In at least 3 cases/group	pValue_eoAD	Difference_eoAD	Fold change_EOAD	Significant_eoAD	Significantly enriched in EOAD plaques	Enriched in LOAD plaques vs non-plaques (Xiong 2019)	Enriched in PCL plaques vs non-plaques (Xiong 2019)	Correlated with Aβ (Bai 2020)
Q9BXS0	COL25A1	COL25A1	Collagen alpha-1(XXV) chain (Alzheimer disease amyloid-associated protein) (AMY) (CLAC-P) [Cleaved into: Collagen-like Alzheimer amyloid plaque component (CLAC)]	2	20.2973	19.0241	20.1844	19.9472	19.8341	19.8574	26.1526	26.8576	27.277	26.8724	26.2325	26.6784	TRUE	3.36391e-05	6.82102	113.066	TRUE	TRUE	19.7374	17.3535	19.8804	17.2217	17.8889	18.4164	25.3584	25.1275	25.344	25.1321	24.6412	25.1207	TRUE	0.000201654	6.70425	104.275	TRUE	TRUE	TRUE		TRUE
P21741	MDK	MDK MK1 NEGF2	Midkine (MK) (Amphiregulin-associated protein) (ARAP) (Midgestation and kidney protein) (Neurite outgrowth-promoting factor 2) (Neurite outgrowth-promoting protein)	7	18.8569	20.6539	18.7805	20.6183	17.9718	19.3763	26.3305	25.8003	26.2305	25.8934	23.3147	25.5139	TRUE	0.000345488	6.13759	70.4044	TRUE	TRUE	17.9572	17.9903	19.3132	18.259	18.3848	18.3809	23.8299	22.705	24.0435	22.7908	23.4013	23.3541	TRUE	3.09216e-05	4.97322	31.4114	TRUE	TRUE	TRUE	TRUE	TRUE
Q9H4F8	SMOC1	SMOC1	SPARC-related modular calcium-binding protein 1 (Secreted modular calcium-binding protein 1) (SMOC-1)	16	21.6015	19.7007	19.1941	21.0252	21.0104	20.5064	27.4252	25.8464	26.657	26.6594	25.3269	26.383	TRUE	0.000309755	5.87662	58.7543	TRUE	TRUE	20.719	21.1244	19.726	21.5395	20.8752	20.7968	25.3733	24.1171	24.2301	24.0146	24.7212	24.4913	TRUE	0.000947089	3.69444	12.9461	TRUE	TRUE	TRUE	TRUE	TRUE
O95631	NTN1	NTN1 NTN1L	Netrin-1 (Epididymis tissue protein Li 131P)	13	19.3278	19.2009	19.1043	19.0053	19.3088	19.1894	26.2129	24.5529	25.6516	26.229	22.6823	25.0657	TRUE	0.00110669	5.87631	58.7417	TRUE	TRUE	17.9241	17.4436	18.3431	18.0721	17.5583	17.8682	24.0367	23.3309	23.3365	21.9362	22.3226	22.9926	TRUE	0.000226448	5.12435	34.8805	TRUE	TRUE	TRUE	TRUE	TRUE
Q92743	HTRA1	HTRA1 HTRA PRSS11	Serine protease HTRA1 (EC 3.4.21.-) (High-temperature requirement A serine peptidase 1) (L56) (Serine protease 11)	15	20.4376	19.7536	19.1016	19.7653	19.9249	19.7966	25.2706	25.1157	25.4345	25.0852	25.1684	25.2149	TRUE	2.56495e-05	5.41832	42.764	TRUE	TRUE	18.8803	16.9327	19.6164	18.9789	19.4874	18.7792	24.2915	22.2943	24.528	21.9496	22.0694	23.0265	TRUE	0.00223536	4.24739	18.9929	TRUE	TRUE	TRUE	TRUE	TRUE
Q9NRN5	OLFML3	OLFML3 PSEC0035 PSEC0173 PSEC0244 UNQ663/PRO1294	Olfactomedin-like protein 3 (HNOEL-iso) (hOLF44)	10	19.176	19.4546	19.6363	20.2873	19.6626	19.6434	24.3168	23.8872	24.1974	24.2334	22.7642	23.8798	TRUE	0.000243027	4.23642	18.8491	TRUE	TRUE	17.3736	18.3481	18.5121	17.903	17.3627	17.8999	22.5407	21.5588	22.6422	22.0178	22.0535	22.1626	TRUE	0.000201493	4.26268	19.1952	TRUE	TRUE	TRUE	TRUE	TRUE
Q14956	GPNMB	GPNMB HGFIN NMB UNQ1725/PRO9925	Transmembrane glycoprotein NMB (Hematopoietic growth factor inducible neurokinin-1 type)	2	19.5471	18.5454	19.0752	18.997	19.5441	19.1417	24.7409	23.8224	20.4627	23.9907	23.4506	23.2935	TRUE	0.00480393	4.15173	17.7744	TRUE	TRUE	18.6131	19.5602	18.9511	18.6903	19.0588	18.9747	23.3331	23.1876	21.278	19.3566	22.5481	21.9407	TRUE	0.0125752	2.96599	7.81359	TRUE	TRUE	TRUE	TRUE	TRUE
P02649	APOE	APOE	Apolipoprotein E (Apo-E)	25	26.8119	27.4916	26.4652	26.9772	26.184	26.786	29.8706	31.5356	31.4893	31.0126	30.5355	30.8887	TRUE	0.000205397	4.10276	17.1812	TRUE	TRUE	24.3909	25.008	24.7781	24.3996	25.1238	24.7401	28.4685	27.8619	28.5207	28.246	27.5257	28.1246	TRUE	0.00046126	3.38449	10.4432	TRUE	TRUE	TRUE	TRUE
Q9HCB6	SPON1	SPON1 KIAA0762 VSGP	Spondin-1 (F-spondin) (Vascular smooth muscle cell growth-promoting factor)	15	21.4671	20.907	21.1155	21.5651	20.384	21.0877	25.9983	24.8109	24.8941	25.8869	24.0774	25.1335	TRUE	1.54079e-05	4.04579	16.516	TRUE	TRUE	17.8971	20.3402	19.0278	18.2607	21.1284	19.3308	23.125	21.4404	22.3043	21.4562	22.2429	22.1137	TRUE	0.0229266	2.78291	6.88241	TRUE	TRUE	TRUE	TRUE
P02743	APCS	APCS PTX2	Serum amyloid P-component (SAP) (9.5S alpha-1-glycoprotein) [Cleaved into: Serum amyloid P-component(1-203)]	6	18.3574	20.8259	18.2638	19.4303	19.5571	19.2869	23.1191	22.7138	23.3836	22.3446	22.0621	22.7246	TRUE	0.00572068	3.43775	10.8359	TRUE	TRUE	19.5011	17.8747	18.0892	19.1433	19.1196	18.7456	21.4286	21.4884	20.7954	20.8768	20.6647	21.0508	TRUE	0.00380579	2.30523	4.94245	TRUE	TRUE	TRUE	TRUE	TRUE
P0C0L4	C4A	C4A CO4 CPAMD2	Complement C4-A (Acidic complement C4) (C3 and PZP-like alpha-2-macroglobulin domain-containing protein 2) [Cleaved into: Complement C4 beta chain; Complement C4-A alpha chain; C4a anaphylatoxin; C4b-A; C4d-A; Complement C4 gamma chain]	45	24.8331	25.7468	24.6703	25.1412	21.3959	24.3575	27.6388	28.3946	28.4002	27.4717	26.5288	27.6868	TRUE	0.00279125	3.32935	10.0516	TRUE	TRUE	22.2163	24.9022	22.9689	20.9108	24.1756	23.0348	25.7439	26.9608	25.6226	24.9276	26.4861	25.9482	TRUE	0.00142411	2.91345	7.53417	TRUE	TRUE	TRUE	TRUE
P51797	CLCN6	CLCN6 KIAA0046	Chloride transport protein 6 (Chloride channel protein 6) (ClC-6)	7	18.946	19.652	18.8846	20.1545	20.1154	19.5505	22.7852	22.8002	22.6514	23.1665	22.7155	22.8238	TRUE	0.000153123	3.27327	9.66832	TRUE	TRUE	18.9923	18.454	18.6306	19.5485	18.8117	18.8874	21.6563	20.7144	18.4224	20.7787	20.3026	20.3749	TRUE	0.0400165	1.48745	2.80393	TRUE	TRUE		TRUE
P35052	GPC1	GPC1	Glypican-1 [Cleaved into: Secreted glypican-1]	13	21.1524	21.1521	20.4313	21.2161	19.0317	20.5967	23.5534	24.0491	23.6058	23.4887	23.7506	23.6895	TRUE	0.0021253	3.09282	8.53159	TRUE	TRUE	20.3636	20.2986	17.5919	20.4032	20.6533	19.8621	23.3354	22.1173	22.8132	23.3427	22.2108	22.7639	TRUE	0.0109367	2.90175	7.47333	TRUE	TRUE	TRUE	TRUE
P02747	C1QC	C1QC C1QG	Complement C1q subcomponent subunit C	4	22.5312	19.1707	23.4315	23.3545	19.2373	21.545	23.96	24.7806	26.0022	24.6998	23.6193	24.6124	TRUE	0.0216851	3.06735	8.3823	TRUE	TRUE	20.7883	22.6104	21.0501	21.4338	21.6031	21.4971	22.7559	23.6108	22.9011	22.9411	22.3857	22.9189	TRUE	0.00358662	1.42177	2.67914	TRUE	TRUE	TRUE
O94985	CLSTN1	CLSTN1 CS1 KIAA0911	Calsyntenin-1 (Alcadein-alpha) (Alc-alpha) (Alzheimer-related cadherin-like protein) (Non-classical cadherin XB31alpha) [Cleaved into: Soluble Alc-alpha (SAlc-alpha); CTF1-alpha (C-terminal fragment 1-alpha)]	12	22.3423	22.7456	19.7963	18.5129	23.4863	21.3767	24.476	24.4549	24.0225	24.7826	24.2592	24.399	TRUE	0.0378248	3.02235	8.12492	TRUE	TRUE	21.6995	20.4824	21.2366	20.2423	21.2702	20.9862	23.7613	21.5358	23.9246	24.4861	23.3213	23.4058	TRUE	0.0100198	2.41963	5.35035	TRUE	TRUE	TRUE	TRUE
	ABETA	ABETA	Amyloid Beta	1	22.5206	21.9256	22.4756	22.9218	22.779	22.5245	27.3724	26.4517	22.8839	25.6801	24.2333	25.3243	TRUE	0.0309859	2.79977	6.96327	TRUE	TRUE	22.4644	23.4636	23.7825	21.6696	22.8346	22.843	26.5996	26.6462	24.97	27.0695	26.8058	26.4182	TRUE	0.00676495	3.57526	11.9196	TRUE	TRUE
Q9UIK5	TMEFF2	TMEFF2 HPP1 TENB2 TPEF UNQ178/PRO204	Tomoregulin-2 (TR-2) (Hyperplastic polyposis protein 1) (Transmembrane protein with EGF-like and two follistatin-like domains)	2	19.0241	18.415	20.3939	19.3774	19.7467	19.3914	22.4566	21.7702	22.1372	22.4599	22.0548	22.1757	TRUE	0.00105009	2.78429	6.889	TRUE	TRUE	17.7818	18.1072	17.4489	18.8324	18.7383	18.1817	21.2212	19.8305	20.6603	20.2229	20.3035	20.4477	TRUE	0.00659239	2.26595	4.80972	TRUE	TRUE	TRUE	TRUE
P0C0L5	C4B	C4B CO4 CPAMD3; C4B_2	Complement C4-B (Basic complement C4) (C3 and PZP-like alpha-2-macroglobulin domain-containing protein 3) [Cleaved into: Complement C4 beta chain; Complement C4-B alpha chain; C4a anaphylatoxin; C4b-B; C4d-B; Complement C4 gamma chain]	45	19.6562	21.9815	19.4325	19.7521	20.5413	20.2727	23.3111	25.3629	23.7462	23.2365	19.6191	23.0551	TRUE	0.0415854	2.78244	6.88013	TRUE	TRUE	18.2572	17.6363	19.0868	18.5527	17.8236	18.2713	20.8602	18.5407	17.8946	18.5262	17.8212	18.7286		0.508944	0.457264	1.37294			TRUE	TRUE	TRUE
Q15582	TGFBI	TGFBI BIGH3	Transforming growth factor-beta-induced protein ig-h3 (Beta ig-h3) (Kerato-epithelin) (RGD-containing collagen-associated protein) (RGD-CAP)	5	19.2764	18.8554	20.6035	20.297	20.176	19.8417	21.9984	22.7274	23.1404	22.9589	21.8359	22.5322	TRUE	0.0015801	2.69052	6.45548	TRUE	TRUE	17.8039	20.01	19.2794	18.6753	17.7935	18.7124	17.3313	20.8028	20.2505	20.6193	20.3436	19.8695	TRUE	0.089576	1.15709	2.23007
Q9BXY4	RSPO3	RSPO3 PWTSR THSD2	R-spondin-3 (Protein with TSP type-1 repeat) (hPWTSR) (Roof plate-specific spondin-3) (hRspo3) (Thrombospondin type-1 domain-containing protein 2)	2	18.0457	19.7855	19.2431	20.7142	19.1257	19.3828	22.3659	21.6974	22.5813	22.5673	21.1323	22.0688	TRUE	0.00549126	2.68601	6.43532	TRUE	TRUE	18.0572	18.7336	19.1961	17.3487	18.2751	18.3221	21.545	19.9294	17.105	19.0651	18.6179	19.2525	TRUE	0.366227	0.930344	1.90573
P05067	APP	APP A4 AD1	Amyloid-beta precursor protein (APP) (ABPP) (APPI) (Alzheimer disease amyloid protein) (Amyloid precursor protein) (Amyloid-beta A4 protein) (Cerebral vascular amyloid peptide) (CVAP) (PreA4) (Protease nexin-II) (PN-II) [Cleaved into: N-APP; Soluble APP-alpha (S-APP-alpha); Soluble APP-beta (S-APP-beta); C99 (Beta-secretase C-terminal fragment) (Beta-CTF); Amyloid-beta protein 42 (Abeta42) (Beta-…	16	26.9949	27.3182	25.141	27.5026	27.1653	26.8244	29.4349	29.1861	28.9652	29.6457	29.6954	29.3855	TRUE	0.00160167	2.56108	5.9015	TRUE	TRUE	27.3872	26.8863	27.1981	26.0172	27.1686	26.9315	29.3109	27.8709	28.565	28.2658	28.008	28.4041	TRUE	0.00547738	1.47261	2.77524	TRUE	TRUE	TRUE	TRUE
Q59EK9	RUNDC3A	RUNDC3A RAP2IP RPIP8	RUN domain-containing protein 3A (Rap2-interacting protein 8) (RPIP-8)	4	19.2559	19.1272	18.673	19.1944	19.1075	19.0716	22.1429	21.9137	20.9384	21.6611	21.137	21.5586	TRUE	9.86284e-05	2.48702	5.60618	TRUE	TRUE	18.5187	18.4759	18.3562	18.4379	18.462	18.4502	20.4824	19.3169	19.8498	19.2769	19.1705	19.6193	TRUE	0.00838019	1.16913	2.24877	TRUE	TRUE
Q5TH69	ARFGEF3	ARFGEF3 BIG3 C6orf92 KIAA1244	Brefeldin A-inhibited guanine nucleotide-exchange protein 3 (ARFGEF family member 3)	20	22.1541	22.1523	21.5634	21.8818	21.6486	21.88	24.4342	24.1942	24.2027	24.7608	23.7144	24.2612	TRUE	0.000131525	2.38121	5.20973	TRUE	TRUE	20.5089	20.5337	20.9821	20.7776	21.237	20.8079	23.1973	22.2337	22.1022	22.3205	22.4757	22.4659	TRUE	0.00395087	1.658	3.15579	TRUE	TRUE
Q8N8S7	ENAH	ENAH MENA	Protein enabled homolog	6	22.5976	22.4425	19.8711	22.583	18.6035	21.2195	23.7014	23.714	23.6108	23.6125	23.0852	23.5448	TRUE	0.034679	2.32523	5.01146	TRUE	TRUE	17.8969	21.4581	20.5025	20.1032	21.2124	20.2346	22.6033	22.8296	20.6981	20.3939	21.2192	21.5488	TRUE	0.209988	1.3142	2.48664
Q00604	NDP	NDP EVR2	Norrin (Norrie disease protein) (X-linked exudative vitreoretinopathy 2 protein)	2	19.2984	19.0539	18.8579	19.8926	19.5912	19.3388	21.2257	21.7854	22.0862	21.8746	20.7816	21.5507	TRUE	0.00328151	2.21189	4.63282	TRUE	TRUE	18.8572	18.3123	19.4772	18.4951	19.4044	18.9093	20.9432	19.9012	21.2444	19.5442	20.6725	20.4611	TRUE	0.00104985	1.55183	2.9319	TRUE	TRUE
P51693	APLP1	APLP1	Amyloid-like protein 1 (APLP) (APLP-1) [Cleaved into: C30]	7	19.6834	20.0031	21.3548	21.1015	21.0502	20.6386	23.6754	22.0312	22.3849	23.3805	22.7326	22.8409	TRUE	0.0111878	2.20231	4.60216	TRUE	TRUE	18.4465	18.8556	18.7623	19.9094	19.3577	19.0663	17.5286	18.6806	21.0911	20.1971	17.5793	19.0153		0.944659	-0.0509903	0.965274
Q7Z3C6	ATG9A	ATG9A APG9L1	Autophagy-related protein 9A (APG9-like 1) (mATG9)	6	20.407	20.9996	18.7096	21.1935	20.8786	20.4376	22.8247	22.3565	22.2291	23.0112	22.6834	22.621	TRUE	0.00429959	2.18336	4.5421	TRUE	TRUE	19.0961	18.373	18.067	18.9167	19.5662	18.8038	20.5432	18.8042	19.3573	19.2353	19.647	19.5174	TRUE	0.0600565	0.713606	1.6399
P13760	NA	NA	NA	7	21.5596	21.8171	21.537	21.8029	20.0457	21.3525	23.7347	23.6852	22.9437	24.5024	22.8018	23.5336	TRUE	0.00102063	2.18107	4.53489	TRUE	TRUE	18.4988	18.587	19.2136	18.2456	17.8605	18.4811	18.0285	21.0186	20.8658	18.2836	20.9139	19.8221	TRUE	0.119144	1.34098	2.53323
P02746	C1QB	C1QB	Complement C1q subcomponent subunit B	6	21.3005	22.2293	22.7877	21.4411	21.0494	21.7616	23.8628	24.058	25.7554	23.287	22.4391	23.8804	TRUE	0.00171335	2.11885	4.34346	TRUE	TRUE	20.2563	21.4496	17.9022	19.647	20.4709	19.9452	21.5347	22.3929	21.2245	21.8817	21.2957	21.6659	TRUE	0.0216662	1.72074	3.29605	TRUE	TRUE
P11117	ACP2	ACP2	Lysosomal acid phosphatase (LAP) (EC 3.1.3.2)	4	20.0296	19.9692	19.5601	19.1302	19.8655	19.7109	22.2485	21.8039	21.485	22.2506	21.3415	21.8259	TRUE	0.00160001	2.11502	4.33196	TRUE	TRUE	19.0965	18.1939	18.995	18.6926	19.6855	18.9327	18.1718	17.7756	18.3638	19.1522	19.3629	18.5653		0.187131	-0.367432	0.775161
P07093	SERPINE2	SERPINE2 PI7 PN1	Glia-derived nexin (GDN) (Peptidase inhibitor 7) (PI-7) (Protease nexin 1) (PN-1) (Protease nexin I) (Serpin E2)	4	19.6336	20.6906	19.7494	19.5825	20.7353	20.0783	22.1217	22.2487	21.9846	22.1351	22.356	22.1692	TRUE	0.000590169	2.09094	4.26026	TRUE	TRUE	17.8971	18.9954	20.1332	19.0584	18.9384	19.0045	20.305	19.2456	20.8964	20.3255	19.6149	20.0775	TRUE	0.0443897	1.07298	2.10378	TRUE	TRUE	TRUE
P05107	ITGB2	ITGB2 CD18 MFI7	Integrin beta-2 (Cell surface adhesion glycoproteins LFA-1/CR3/p150,95 subunit beta) (Complement receptor C3 subunit beta) (CD antigen CD18)	5	20.0089	20.177	20.1454	20.5897	19.8043	20.1451	22.4968	22.4877	23.0145	23.1139	19.9859	22.2198	TRUE	0.0125873	2.0747	4.21258	TRUE	TRUE	17.6566	19.2558	18.1208	18.2105	18.722	18.3931	19.5865	18.9462	18.076	18.238	17.6825	18.5058		0.829968	0.112743	1.08128			TRUE	TRUE
Q06481	APLP2	APLP2 APPL2	Amyloid-like protein 2 (APLP-2) (APPH) (Amyloid protein homolog) (CDEI box-binding protein) (CDEBP)	4	19.661	19.5254	19.0425	19.607	19.2752	19.4222	21.6908	21.6248	21.1509	22.014	20.9031	21.4767	TRUE	7.98478e-05	2.0545	4.154	TRUE	TRUE	17.9541	18.3241	17.9095	18.7071	19.3896	18.4569	18.5401	18.9903	19.7553	18.7498	18.4103	18.8892		0.399978	0.432297	1.34938
Q9UEU0	VTI1B	VTI1B VTI1 VTI1L VTI1L1 VTI2	Vesicle transport through interaction with t-SNAREs homolog 1B (Vesicle transport v-SNARE protein Vti1-like 1) (Vti1-rp1)	7	21.3203	21.397	19.1592	21.9835	19.6302	20.698	22.9766	22.8109	22.3163	23.52	22.0876	22.7423	TRUE	0.00356084	2.04424	4.12455	TRUE	TRUE	20.3863	17.788	20.4611	20.7167	18.9118	19.6528	20.9322	20.0265	20.8827	20.8688	20.4978	20.6416	TRUE	0.0669799	0.988814	1.98455
P51809	VAMP7	VAMP7 SYBL1	Vesicle-associated membrane protein 7 (VAMP-7) (Synaptobrevin-like protein 1) (Tetanus-insensitive VAMP) (Ti-VAMP)	3	20.8683	19.2649	20.7735	21.0261	18.5597	20.0985	21.9626	22.0091	22.2046	22.4172	21.8505	22.0888	TRUE	0.0099865	1.99028	3.97314	TRUE	TRUE	18.8527	19.5558	18.9492	17.8055	18.0247	18.6376	20.7648	19.9618	20.5399	20.0095	19.8375	20.2227	TRUE	0.00698326	1.58514	3.00036	TRUE	TRUE
P10909	CLU	CLU APOJ CLI KUB1 AAG4	Clusterin (Aging-associated gene 4 protein) (Apolipoprotein J) (Apo-J) (Complement cytolysis inhibitor) (CLI) (Complement-associated protein SP-40,40) (Ku70-binding protein 1) (NA1/NA2) (Sulfated glycoprotein 2) (SGP-2) (Testosterone-repressed prostate message 2) (TRPM-2) [Cleaved into: Clusterin beta chain (ApoJalpha) (Complement cytolysis inhibitor a chain); Clusterin alpha chain (ApoJbeta) (Co…	16	26.1283	25.8598	25.5542	25.7445	26.1175	25.8809	27.7887	27.7179	28.0026	27.6954	28.1496	27.8709	TRUE	0.00010716	1.98999	3.97235	TRUE	TRUE	24.7754	24.7582	24.8412	24.3005	24.9394	24.7229	26.8018	25.6328	27.1132	25.966	26.3819	26.3791	TRUE	0.00239108	1.65621	3.15188	TRUE	TRUE			TRUE
Q99435	NELL2	NELL2 NRP2	Protein kinase C-binding protein NELL2 (NEL-like protein 2) (Nel-related protein 2)	6	21.7257	18.6476	20.4317	20.3238	20.0418	20.2341	21.774	22.2507	22.2461	22.6297	21.9991	22.1799	TRUE	0.0269101	1.94582	3.85256	TRUE	TRUE	19.7165	19.5268	18.4927	19.1722	19.4045	19.2625	21.406	19.8799	19.9349	19.6907	19.7635	20.135	TRUE	0.038518	0.872462	1.83078	TRUE	TRUE
Q7L523	RRAGA	RRAGA	Ras-related GTP-binding protein A (Rag A) (RagA) (Adenovirus E3 14.7 kDa-interacting protein 1) (FIP-1)	3	19.1719	20.5033	19.9997	21.0491	21.1916	20.3831	22.0651	22.1701	22.0382	22.8467	22.1699	22.258	TRUE	0.00375256	1.87486	3.66767	TRUE	TRUE	18.0611	20.0028	19.1803	19.3072	19.0546	19.1212	20.8113	19.9718	19.5385	17.6509	18.3684	19.2682		0.85123	0.146969	1.10724
P08603	CFH	CFH HF HF1 HF2	Complement factor H (H factor 1)	4	19.6944	20.9993	19.8733	18.8362	19.2933	19.7393	21.3454	21.377	23.0239	21.0636	20.9572	21.5534	TRUE	0.0158418	1.81413	3.51647	TRUE	TRUE	20.3537	19.8061	17.744	17.8166	18.032	18.7505	18.518	18.0648	18.2783	17.3358	20.7498	18.5893		0.857531	-0.161138	0.894319
Q9BT88	SYT11	SYT11 KIAA0080	Synaptotagmin-11 (Synaptotagmin XI) (SytXI)	4	19.4283	20.0159	20.0973	19.7907	20.2817	19.9228	21.4815	21.9896	21.546	21.7613	21.7634	21.7084	TRUE	0.000171403	1.78558	3.44757	TRUE	TRUE	19.1977	17.657	18.2016	17.6498	18.5708	18.2554	18.5602	17.7633	20.3639	18.55	18.3414	18.7157		0.404799	0.460389	1.37591			TRUE	TRUE
P51798	CLCN7	CLCN7	H(+)/Cl(-) exchange transporter 7 (Chloride channel 7 alpha subunit) (Chloride channel protein 7) (ClC-7)	6	20.264	20.9232	21.0765	20.7204	21.0243	20.8017	22.7085	22.4005	22.3561	23.6778	21.6129	22.5512	TRUE	0.0144641	1.74949	3.36239	TRUE	TRUE	18.6615	17.9053	18.7459	17.5207	19.0121	18.3691	17.5299	18.3559	21.0465	17.617	18.677	18.6453		0.653811	0.276162	1.21097
Q9Y6U3	SCIN	SCIN KIAA1905	Adseverin (Scinderin)	10	19.5497	21.6122	21.9398	21.6301	18.9017	20.7267	21.9327	23.4385	24.2874	24.2313	18.4849	22.475	TRUE	0.0347025	1.74827	3.35957	TRUE	TRUE	18.52	21.0718	18.2008	17.8082	18.2317	18.7665	20.7804	21.087	18.8482	18.6996	17.6191	19.4069		0.254805	0.64035	1.55871			TRUE	TRUE	TRUE
Q9Y3Z3	SAMHD1	SAMHD1 MOP5	Deoxynucleoside triphosphate triphosphohydrolase SAMHD1 (dNTPase) (EC 3.1.5.-) (Dendritic cell-derived IFNG-induced protein) (DCIP) (Monocyte protein 5) (MOP-5) (SAM domain and HD domain-containing protein 1) (hSAMHD1)	4	18.1035	20.8842	20.4169	20.8773	18.9891	19.8542	21.6808	21.9969	22.3079	22.2278	19.5228	21.5472	TRUE	0.0310238	1.69306	3.23341	TRUE	TRUE	17.7048	19.7632	19.2732	18.5556	17.7792	18.6152	20.0118	20.4159	19.7438	18.5457	18.379	19.4192	TRUE	0.11055	0.804009	1.74595
P12111	COL6A3	COL6A3	Collagen alpha-3(VI) chain	7	19.2524	19.9217	21.7792	19.742	19.3186	20.0028	21.4528	21.9915	22.0314	22.198	20.4426	21.6233	TRUE	0.0167254	1.62049	3.07479	TRUE	TRUE	20.9973	20.7525	21.0075	21.2274	19.0773	20.6124	18.8277	21.1158	18.5906	21.3584	20.6865	20.1158	TRUE	0.557178	-0.496616	0.708767
O00182	LGALS9	LGALS9	Galectin-9 (Gal-9) (Ecalectin) (Tumor antigen HOM-HD-21)	3	19.4815	20.5758	20.0622	19.849	18.4651	19.6867	21.379	21.6762	21.6945	22.217	19.4356	21.2805	TRUE	0.00345825	1.59375	3.01833	TRUE	TRUE	20.0243	18.9851	19.0973	17.7482	17.7831	18.7276	17.7272	17.8719	19.3922	18.8324	19.6025	18.6852		0.957344	-0.0423607	0.971065
P41222	PTGDS	PTGDS PDS	Prostaglandin-H2 D-isomerase (EC 5.3.99.2) (Beta-trace protein) (Cerebrin-28) (Glutathione-independent PGD synthase) (Lipocalin-type prostaglandin-D synthase) (Prostaglandin-D2 synthase) (PGD2 synthase) (PGDS) (PGDS2)	3	22.844	23.0455	23.0015	23.5728	23.0121	23.0952	24.453	24.7887	25.2925	24.8739	23.979	24.6774	TRUE	0.00205206	1.58226	2.99439	TRUE	TRUE	22.2213	22.4994	22.3885	22.0172	21.9534	22.216	23.6806	23.1356	23.7387	23.04	23.2159	23.3621	TRUE	0.0014364	1.14617	2.21326	TRUE	TRUE
Q9NVJ2	ARL8B	ARL8B ARL10C GIE1	ADP-ribosylation factor-like protein 8B (ADP-ribosylation factor-like protein 10C) (Novel small G protein indispensable for equal chromosome segregation 1)	6	23.3404	24.3262	23.3936	24.0245	24.1753	23.852	25.464	25.2843	25.3765	25.462	25.4428	25.4059	TRUE	0.00208339	1.55391	2.93612	TRUE	TRUE	22.748	22.4933	22.4784	22.6009	22.6167	22.5875	24.0959	23.6232	23.7745	23.5372	23.6209	23.7303	TRUE	0.000138637	1.14287	2.20819	TRUE	TRUE		TRUE
P01024	C3	C3 CPAMD1	Complement C3 (C3 and PZP-like alpha-2-macroglobulin domain-containing protein 1) [Cleaved into: Complement C3 beta chain; C3-beta-c (C3bc); Complement C3 alpha chain; C3a anaphylatoxin; Acylation stimulating protein (ASP) (C3adesArg); Complement C3b alpha' chain; Complement C3c alpha' chain fragment 1; Complement C3dg fragment; Complement C3g fragment; Complement C3d fragment; Complement C3f fra…	56	26.0071	26.3289	25.8775	26.3283	25.9192	26.0922	27.4479	27.7266	27.976	27.618	27.4594	27.6456	TRUE	0.000397578	1.55341	2.93511	TRUE	TRUE	25.0056	25.3678	24.7212	24.7852	25.2242	25.0208	26.8724	26.3502	26.3209	25.7506	26.3724	26.3333	TRUE	0.00187009	1.3125	2.48371	TRUE	TRUE
O00468	AGRN	AGRN AGRIN	Agrin [Cleaved into: Agrin N-terminal 110 kDa subunit; Agrin C-terminal 110 kDa subunit; Agrin C-terminal 90 kDa fragment (C90); Agrin C-terminal 22 kDa fragment (C22)]	16	22.843	22.7472	22.2795	22.7176	22.6669	22.6508	24.1658	23.9941	24.2956	24.0274	24.5139	24.1994	TRUE	0.000624666	1.54853	2.92519	TRUE	TRUE	21.9556	21.7247	22.3714	21.8759	21.0329	21.7921	22.8634	22.4115	22.9324	22.8269	22.4167	22.6902	TRUE	0.00310856	0.898087	1.86359	TRUE	TRUE
Q6IAA8	LAMTOR1	LAMTOR1 C11orf59 PDRO PP7157	Ragulator complex protein LAMTOR1 (Late endosomal/lysosomal adaptor and MAPK and MTOR activator 1) (Lipid raft adaptor protein p18) (Protein associated with DRMs and endosomes) (p27Kip1-releasing factor from RhoA) (p27RF-Rho)	4	20.7912	19.6269	20.3457	20.5602	20.3058	20.326	22.4583	21.3535	21.2396	22.4116	21.7292	21.8384	TRUE	0.000873895	1.51248	2.85299	TRUE	TRUE	18.6415	19.1936	18.7266	18.9304	19.152	18.9288	21.0056	20.6511	20.2764	19.533	20.1799	20.3292	TRUE	0.00889254	1.40035	2.63965	TRUE	TRUE
Q9NQX7	ITM2C	ITM2C BRI3 hucep-14 NPD018 PSEC0047	Integral membrane protein 2C (Cerebral protein 14) (Transmembrane protein BRI3) [Cleaved into: CT-BRI3]	4	21.1435	18.5985	20.5497	19.5602	18.4745	19.6653	22.0204	21.4083	21.3267	22.0081	19.0927	21.1712	TRUE	0.0314665	1.50593	2.84007	TRUE	TRUE	18.3153	17.1074	18.8859	18.4429	18.8447	18.3192	18.3693	17.2682	17.2482	18.3443	19.4896	18.1439		0.673389	-0.175311	0.885577
Q9ULB1	NRXN1	NRXN1 KIAA0578	Neurexin-1 (Neurexin I-alpha) (Neurexin-1-alpha)	17	23.3684	23.4788	22.7448	23.6741	23.9449	23.4422	25.1811	24.6897	24.8711	24.6275	25.2248	24.9188	TRUE	0.00232429	1.47663	2.78298	TRUE	TRUE	22.6381	21.8081	22.7932	23.0803	22.5764	22.5792	24.4799	23.1217	24.5082	24.4557	24.0988	24.1329	TRUE	9.96785e-05	1.55367	2.93562	TRUE	TRUE	TRUE	TRUE
Q9BQT9	CLSTN3	CLSTN3 CS3 KIAA0726	Calsyntenin-3 (Alcadein-beta) (Alc-beta)	6	18.9082	19.6849	20.0563	19.8141	18.8505	19.4628	21.5203	20.7281	20.4781	22.122	19.6097	20.8916	TRUE	0.0303601	1.42884	2.69231	TRUE	TRUE	16.3954	19.2979	17.5857	18.9233	19.0173	18.2439	19.5507	17.1635	16.9601	18.488	18.7224	18.1769		0.942344	-0.0670052	0.954618				TRUE
Q15631	TSN	TSN	Translin (EC 3.1.-.-) (Component 3 of promoter of RISC) (C3PO)	3	18.3135	20.7071	19.2672	21.0068	20.5999	19.9789	21.305	21.8226	21.1754	21.2059	21.4371	21.3892	TRUE	0.0427717	1.4103	2.65792	TRUE	TRUE	20.3917	21.5467	20.578	20.6331	20.3642	20.7027	21.1275	20.8821	21.0875	20.529	20.2053	20.7663	TRUE	0.812536	0.0635342	1.04502
P15311	EZR	EZR VIL2	Ezrin (Cytovillin) (Villin-2) (p81)	27	25.2238	24.7252	25.204	25.5271	24.4771	25.0314	26.7309	26.958	26.1038	27.1173	25.1852	26.4191	TRUE	0.00689075	1.38761	2.61645	TRUE	TRUE	23.9981	24.9676	23.6713	23.5584	24.498	24.1387	25.0515	25.6976	24.5356	24.4948	24.5556	24.867	TRUE	0.0143152	0.728338	1.65673	TRUE	TRUE
P26038	MSN	MSN	Moesin (Membrane-organizing extension spike protein)	41	26.2848	26.4029	26.3397	26.3035	25.8161	26.2294	27.8717	27.5659	28.1997	27.8993	26.5021	27.6077	TRUE	0.00259329	1.37833	2.59968	TRUE	TRUE	24.9897	26.2364	24.9092	24.4241	25.285	25.1689	26.6625	27.8779	25.8302	25.3014	25.6052	26.2554	TRUE	0.0132088	1.08655	2.12366	TRUE	TRUE
P50897	PPT1	PPT1 CLN1 PPT	Palmitoyl-protein thioesterase 1 (PPT-1) (EC 3.1.2.22) (Palmitoyl-protein hydrolase 1)	5	21.7149	21.5951	21.3595	22.215	21.7384	21.7246	23.3382	23.3979	23.2342	23.3316	22.1965	23.0997	TRUE	0.00654423	1.37509	2.59385	TRUE	TRUE	21.5838	22.1815	21.37	21.7899	21.2109	21.6272	22.5041	22.2348	22.5148	21.9357	21.7403	22.186	TRUE	0.0580301	0.558736	1.47298
Q9NRX5	SERINC1	SERINC1 KIAA1253 TDE1L TDE2 UNQ396/PRO732	Serine incorporator 1 (Tumor differentially expressed protein 1-like) (Tumor differentially expressed protein 2)	2	19.7415	20.9354	18.6125	18.9223	19.8556	19.6134	20.9843	21.0552	20.829	21.3949	20.6028	20.9732	TRUE	0.0369399	1.3598	2.5665	TRUE	TRUE	17.4977	18.2895	19.5167	19.377	17.3337	18.4029	17.9094	18.7237	18.6514	17.4713	18.9191	18.335		0.915474	-0.0679371	0.954001
Q86T03	PIP4P1	PIP4P1 C14orf9 TMEM55B	Type 1 phosphatidylinositol 4,5-bisphosphate 4-phosphatase (Type 1 PtdIns-4,5-P2 4-Ptase) (EC 3.1.3.78) (PtdIns-4,5-P2 4-Ptase I) (Transmembrane protein 55B)	3	20.1553	20.0223	18.844	20.2383	19.7668	19.8054	21.3286	20.9767	21.2141	21.4486	20.8405	21.1617	TRUE	0.00620511	1.35632	2.56031	TRUE	TRUE	18.2418	18.3447	19.2549	17.6526	18.8498	18.4688	19.9028	18.6614	17.5798	18.6105	18.7446	18.6998		0.702305	0.231026	1.17367
Q9P2S2	NRXN2	NRXN2 KIAA0921	Neurexin-2 (Neurexin II-alpha) (Neurexin-2-alpha)	7	19.9115	18.9831	20.1404	20.4813	21.2808	20.1594	21.5504	21.3745	21.1237	21.5379	21.8284	21.483	TRUE	0.0141944	1.32356	2.50283	TRUE	TRUE	19.9181	19.5782	19.0847	19.8575	19.3796	19.5636	20.7001	19.5539	20.4289	21.2713	20.5967	20.5102	TRUE	0.0237285	0.94657	1.92729	TRUE	TRUE
Q92581	SLC9A6	SLC9A6 KIAA0267 NHE6	Sodium/hydrogen exchanger 6 (Na(+)/H(+) exchanger 6) (NHE-6) (Solute carrier family 9 member 6)	5	21.2252	22.2395	20.9755	22.0699	20.7809	21.4582	22.8634	22.7371	22.3334	23.0995	22.7054	22.7478	TRUE	0.00646071	1.28956	2.44454	TRUE	TRUE	20.5136	20.2337	20.2463	20.2917	20.7395	20.405	20.962	20.9533	20.8685	20.8629	20.9517	20.9197	TRUE	0.00414897	0.514682	1.42868
Q9UNK0	STX8	STX8	Syntaxin-8	5	20.5381	19.5409	20.2558	20.7954	19.9816	20.2224	21.9967	21.5778	20.9558	21.8495	20.9998	21.4759	TRUE	0.00549928	1.25355	2.38427	TRUE	TRUE	17.5237	17.4348	17.4112	18.9968	17.8485	17.843	19.8392	19.2838	19.5633	19.5936	19.2576	19.5075	TRUE	0.00569511	1.6645	3.17003	TRUE	TRUE
Q9H3N1	TMX1	TMX1 TMX TXNDC TXNDC1 PSEC0085 UNQ235/PRO268	Thioredoxin-related transmembrane protein 1 (Thioredoxin domain-containing protein 1) (Transmembrane Trx-related protein)	2	18.8157	19.5257	19.8011	21.4599	18.3506	19.5906	19.0978	21.4934	21.5281	21.771	20.16	20.8101	TRUE	0.0322951	1.21946	2.32859	TRUE	TRUE	19.9456	20.0993	18.7316	18.839	19.7848	19.4801	19.8897	20.3795	18.4486	18.9451	18.4649	19.2255	TRUE	0.417906	-0.254522	0.838265
Q86UX7	FERMT3	FERMT3 KIND3 MIG2B URP2	Fermitin family homolog 3 (Kindlin-3) (MIG2-like protein) (Unc-112-related protein 2)	3	19.2522	20.2222	20.6713	19.7605	19.6438	19.91	20.7012	20.8215	21.4086	21.8613	20.726	21.1037	TRUE	0.011555	1.19374	2.28745	TRUE	TRUE	17.9357	18.6954	18.2207	18.5617	18.5772	18.3981	18.6515	18.0803	19.385	19.3412	18.8022	18.8521		0.212305	0.453911	1.36975
O75110	ATP9A	ATP9A ATPIIA KIAA0611	Probable phospholipid-transporting ATPase IIA (EC 7.6.2.1) (ATPase class II type 9A)	10	23.2344	23.1974	22.3915	23.0948	23.2283	23.0293	24.3386	24.1945	24.0962	24.5535	23.8857	24.2137	TRUE	0.00289925	1.18443	2.27273	TRUE	TRUE	21.8583	21.5743	21.6899	21.8811	21.9455	21.7898	22.9489	22.4305	22.6831	22.288	22.6315	22.5964	TRUE	0.00262101	0.806575	1.74905	TRUE	TRUE
P07602	PSAP	PSAP GLBA SAP1	Prosaposin (Proactivator polypeptide) [Cleaved into: Saposin-A (Protein A); Saposin-B-Val; Saposin-B (Cerebroside sulfate activator) (CSAct) (Dispersin) (Sphingolipid activator protein 1) (SAP-1) (Sulfatide/GM1 activator); Saposin-C (A1 activator) (Co-beta-glucosidase) (Glucosylceramidase activator) (Sphingolipid activator protein 2) (SAP-2); Saposin-D (Component C) (Protein C)]	8	24.3079	25.0162	24.7108	24.5773	24.1465	24.5518	25.8107	25.6282	25.6394	25.7727	25.7012	25.7104	TRUE	0.00282985	1.15867	2.23252	TRUE	TRUE	24.0359	24.3828	24.1655	23.8956	22.2214	23.7403	25.1204	24.5747	24.5447	24.2627	24.0623	24.513	TRUE	0.0660457	0.772702	1.70847
P39060	COL18A1	COL18A1	Collagen alpha-1(XVIII) chain [Cleaved into: Endostatin; Non-collagenous domain 1 (NC1)]	6	21.4292	20.9755	21.4734	20.8797	21.2629	21.2041	22.1275	22.3542	23.0635	21.9676	22.1972	22.342	TRUE	0.00197226	1.13784	2.20051	TRUE	TRUE	19.6053	20.4175	17.8944	19.8141	19.2311	19.3925	18.2745	20.2227	19.8513	20.4673	19.6265	19.6885	TRUE	0.611284	0.296017	1.22775
Q9HB90	RRAGC	RRAGC	Ras-related GTP-binding protein C (Rag C) (RagC) (GTPase-interacting protein 2) (TIB929)	3	19.886	19.5834	19.5265	19.7358	19.9632	19.739	21.1489	20.6105	20.5219	20.7934	21.2509	20.8651	TRUE	5.33391e-05	1.12614	2.18275	TRUE	TRUE	18.7632	18.7888	18.753	18.8936	18.5481	18.7493	19.8425	19.3537	19.7414	19.9081	19.4931	19.6678	TRUE	0.000542638	0.918433	1.89006	TRUE	TRUE
Q9NQ79	CRTAC1	CRTAC1 ASPIC1 CEP68	Cartilage acidic protein 1 (68 kDa chondrocyte-expressed protein) (CEP-68) (ASPIC)	6	21.4105	21.2278	20.9998	21.2269	21.6645	21.3059	21.9653	21.9362	23.0742	22.1857	22.9573	22.4237	TRUE	0.014337	1.11782	2.17019	TRUE	TRUE	21.0019	18.6345	21.9094	21.0359	20.7668	20.6697	22.0531	20.8755	22.4716	21.8096	21.3658	21.7151	TRUE	0.0283021	1.04541	2.06396	TRUE	TRUE
Q9BTU6	PI4K2A	PI4K2A	Phosphatidylinositol 4-kinase type 2-alpha (EC 2.7.1.67) (Phosphatidylinositol 4-kinase type II-alpha)	5	19.6899	19.7084	20.1341	19.6527	20.1737	19.8717	21.5133	20.4816	20.5361	21.3682	20.8962	20.9591	TRUE	0.0191066	1.08734	2.12481	TRUE	TRUE	19.0186	18.2704	19.0498	17.8713	18.9713	18.6363	19.047	19.2282	17.9928	18.3802	19.3501	18.7996		0.655468	0.163368	1.1199
Q07954	LRP1	LRP1 A2MR APR	Prolow-density lipoprotein receptor-related protein 1 (LRP-1) (Alpha-2-macroglobulin receptor) (A2MR) (Apolipoprotein E receptor) (APOER) (CD antigen CD91) [Cleaved into: Low-density lipoprotein receptor-related protein 1 85 kDa subunit (LRP-85); Low-density lipoprotein receptor-related protein 1 515 kDa subunit (LRP-515); Low-density lipoprotein receptor-related protein 1 intracellular domain (L…	42	24.4114	24.5759	23.9725	24.2691	23.9875	24.2433	25.1673	25.2428	25.5994	25.8444	24.6569	25.3022	TRUE	0.00885618	1.05889	2.08332	TRUE	TRUE	22.8056	22.9101	23.2532	23.2879	23.2322	23.0978	24.0464	23.6165	24.0409	23.7225	24.1359	23.9124	TRUE	0.00346024	0.814653	1.75887	TRUE	TRUE
P16870	CPE	CPE	Carboxypeptidase E (CPE) (EC 3.4.17.10) (Carboxypeptidase H) (CPH) (Enkephalin convertase) (Prohormone-processing carboxypeptidase)	11	23.9628	24.4637	22.6247	24.6641	24.0698	23.957	24.9422	25.0383	25.0001	25.5816	24.4821	25.0088	TRUE	0.0388218	1.05182	2.07314	TRUE	TRUE	22.7312	22.3508	22.3784	22.402	22.9403	22.5605	23.6573	23.0336	23.2154	23.1033	23.1967	23.2413	TRUE	0.00409682	0.68073	1.60295	TRUE	TRUE
O14773	TPP1	TPP1 CLN2 GIG1 UNQ267/PRO304	Tripeptidyl-peptidase 1 (TPP-1) (EC 3.4.14.9) (Cell growth-inhibiting gene 1 protein) (Lysosomal pepstatin-insensitive protease) (LPIC) (Tripeptidyl aminopeptidase) (Tripeptidyl-peptidase I) (TPP-I)	4	23.3279	22.5226	24.3884	22.8355	22.5736	23.1296	24.5116	24.4275	24.4042	24.0349	23.4702	24.1697	TRUE	0.0271013	1.04009	2.05635	TRUE	TRUE	22.4564	23.5099	22.6303	22.1696	22.0907	22.5714	23.4624	23.5517	23.3027	22.9324	22.7814	23.2061	TRUE	0.0164911	0.634717	1.55263	TRUE	TRUE
Q96BM9	ARL8A	ARL8A ARL10B GIE2	ADP-ribosylation factor-like protein 8A (ADP-ribosylation factor-like protein 10B) (Novel small G protein indispensable for equal chromosome segregation 2)	6	22.1757	22.3233	21.8731	22.287	22.7539	22.2826	23.6642	23.346	23.2524	23.3092	23.0171	23.3178	TRUE	0.00848625	1.03518	2.04937	TRUE	TRUE	21.1846	21.3398	21.2516	20.8631	21.2893	21.1857	21.5314	21.8725	21.6937	21.2731	21.6771	21.6096	TRUE	0.000172032	0.423859	1.34151
Q9NUM4	TMEM106B	TMEM106B	Transmembrane protein 106B	2	18.8752	20.1048	19.4501	19.0892	18.5867	19.2212	20.0487	20.6829	19.5823	20.3932	20.4399	20.2294	TRUE	0.0278291	1.00822	2.01143	TRUE	TRUE	18.1378	18.0745	19.6041	17.8742	18.8602	18.5102	18.1868	17.5747	18.2064	18.4897	19.614	18.4143		0.819801	-0.0958595	0.935715
P02647	APOA1	APOA1	Apolipoprotein A-I (Apo-AI) (ApoA-I) (Apolipoprotein A1) [Cleaved into: Proapolipoprotein A-I (ProapoA-I); Truncated apolipoprotein A-I (Apolipoprotein A-I(1-242))]	8	21.3834	20.9838	20.7463	21.788	20.0158	20.9835	22.9643	21.1489	22.5229	22.5103	20.6806	21.9654	TRUE	0.0313699	0.981919	1.97509	TRUE	TRUE	20.5677	17.24	20.4634	20.2896	20.4915	19.8105	18.4159	17.422	20.6597	20.1456	20.429	19.4144	TRUE	0.422837	-0.396019	0.759952
Q8IV08	PLD3	PLD3	5'-3' exonuclease PLD3 (EC 3.1.16.1) (Choline phosphatase 3) (HindIII K4L homolog) (Hu-K4) (Phosphatidylcholine-hydrolyzing phospholipase D3) (Phospholipase D3) (PLD 3)	6	22.1092	22.1333	22.4745	21.8742	21.4944	22.0172	23.6931	23.0615	22.7461	23.2062	22.286	22.9986	TRUE	0.0123746	0.981417	1.9744	TRUE	TRUE	20.578	20.4604	20.7784	20.9291	20.7411	20.6974	22.0235	21.5395	21.4101	21.6307	21.766	21.674	TRUE	0.00260895	0.976557	1.96776	TRUE	TRUE
Q86Y82	STX12	STX12	Syntaxin-12	10	23.6906	23.2012	23.6472	23.7974	23.5382	23.5749	24.8014	24.645	24.3882	24.7824	24.148	24.553	TRUE	0.00258419	0.978063	1.96982	TRUE	TRUE	22.1555	22.2934	22.1162	22.4357	22.5562	22.3114	23.179	22.5182	23.1038	22.8617	22.8449	22.9015	TRUE	0.0268973	0.590104	1.50536	TRUE	TRUE
O15240	VGF	VGF	Neurosecretory protein VGF [Cleaved into: Neuroendocrine regulatory peptide-1 (NERP-1); Neuroendocrine regulatory peptide-2 (NERP-2); VGF-derived peptide TLQP-21; VGF-derived peptide TLQP-62; Antimicrobial peptide VGF[554-577]]	12	24.2511	23.5811	23.0559	24.2044	22.7252	23.5635	25.2738	23.936	24.4733	25.2634	23.7195	24.5332	TRUE	0.00484405	0.969665	1.95839	TRUE	TRUE	21.5882	21.0604	18.1302	22.8171	21.8903	21.0972	22.8899	22.1003	21.6509	22.9517	22.4513	22.4088	TRUE	0.0893645	1.31157	2.48211
P40121	CAPG	CAPG AFCP MCP	Macrophage-capping protein (Actin regulatory protein CAP-G)	9	22.9825	23.6531	24.2833	23.2231	21.8349	23.1954	24.0833	24.7954	25.064	24.5447	22.1426	24.126	TRUE	0.0064534	0.93062	1.90609	TRUE	TRUE	21.2523	23.3454	20.8651	20.3704	21.5853	21.4837	23.3235	23.5101	22.652	21.3586	22.3495	22.6388	TRUE	0.0289836	1.15504	2.2269	TRUE	TRUE
O15061	SYNM	SYNM DMN KIAA0353 SYN	Synemin (Desmuslin)	12	22.2879	22.4723	22.653	22.0895	19.7913	21.8588	23.0824	22.6667	23.5188	23.2365	21.44	22.7889	TRUE	0.0172801	0.930092	1.9054	TRUE	TRUE	19.9209	22.4542	19.3552	19.5574	19.6389	20.1853	20.9623	22.3093	20.9918	19.6212	19.5279	20.6825	TRUE	0.237312	0.497177	1.41145
P06703	S100A6	S100A6 CACY	Protein S100-A6 (Calcyclin) (Growth factor-inducible protein 2A9) (MLN 4) (Prolactin receptor-associated protein) (PRA) (S100 calcium-binding protein A6)	3	24.8943	25.084	24.6549	24.5148	18.299	23.4894	25.4377	25.2219	25.837	25.3225	20.2782	24.4195	TRUE	0.0409839	0.930074	1.90537	TRUE	TRUE	24.0574	24.8642	22.466	21.5898	20.2329	22.642	24.055	24.9089	23.2165	19.685	23.309	23.0349	TRUE	0.65016	0.392832	1.31297
Q14108	SCARB2	SCARB2 CD36L2 LIMP2 LIMPII	Lysosome membrane protein 2 (85 kDa lysosomal membrane sialoglycoprotein) (LGP85) (CD36 antigen-like 2) (Lysosome membrane protein II) (LIMP II) (Scavenger receptor class B member 2) (CD antigen CD36)	6	22.2665	22.049	22.7096	22.515	22.3226	22.3725	23.3441	22.985	23.2325	23.607	23.2342	23.2806	TRUE	0.00090985	0.908019	1.87647	TRUE	TRUE	21.641	21.8899	22.253	21.9293	21.2697	21.7966	22.0754	21.7997	22.8042	22.45	21.6191	22.1497	TRUE	0.0385472	0.353098	1.2773
Q9Y6W5	WASF2	WASF2 WAVE2	Wiskott-Aldrich syndrome protein family member 2 (WASP family protein member 2) (Protein WAVE-2) (Verprolin homology domain-containing protein 2)	2	19.9475	20.5436	19.2399	20.1283	18.8005	19.732	21.1656	20.3734	20.2675	21.3711	19.8348	20.6025	TRUE	0.0300125	0.870522	1.82832	TRUE	TRUE	18.0005	18.0809	18.1578	19.0565	18.3549	18.3301	18.6925	18.5528	18.3901	17.9932	18.097	18.3451	TRUE	0.96406	0.0149761	1.01043
P17948	FLT1	FLT1 FLT FRT VEGFR1	Vascular endothelial growth factor receptor 1 (VEGFR-1) (EC 2.7.10.1) (Fms-like tyrosine kinase 1) (FLT-1) (Tyrosine-protein kinase FRT) (Tyrosine-protein kinase receptor FLT) (FLT) (Vascular permeability factor receptor)	4	20.4188	19.5954	19.6839	19.1441	20.5202	19.8725	21.2547	20.2128	21.054	20.7526	20.435	20.7418	TRUE	0.0432449	0.86934	1.82683	TRUE	TRUE	18.9252	19.1518	18.9162	19.0052	18.5119	18.9021	18.0886	19.2753	18.7414	18.8877	19.0793	18.8145	TRUE	0.720721	-0.0876289	0.941068			TRUE	TRUE	TRUE
P35241	RDX	RDX	Radixin	29	23.8668	23.6164	23.5417	23.7438	23.3791	23.6296	24.7723	24.4213	24.8799	24.4876	23.8875	24.4897	TRUE	0.00321357	0.860166	1.81525	TRUE	TRUE	22.7895	23.5596	22.9589	22.0576	22.5003	22.7732	23.8847	25.1343	22.4769	22.5333	22.4177	23.2894	TRUE	0.240681	0.516193	1.43018
Q9UBP4	DKK3	DKK3 REIC UNQ258/PRO295	Dickkopf-related protein 3 (Dickkopf-3) (Dkk-3) (hDkk-3)	11	23.6287	23.7797	23.0078	24.0781	23.3911	23.5771	24.8179	24.3647	24.2529	24.5619	24.1745	24.4344	TRUE	0.00520633	0.857312	1.81166	TRUE	TRUE	22.2227	22.2968	21.8903	21.4919	22.2312	22.0266	23.7306	22.6003	23.0824	22.9303	23.1069	23.0901	TRUE	0.00842457	1.06352	2.09002	TRUE	TRUE
P08670	VIM	VIM	Vimentin	53	29.4693	28.9571	29.6704	29.1859	27.2799	28.9125	30.4932	29.6171	30.4515	30.4498	27.7714	29.7566	TRUE	0.00344264	0.844106	1.79515	TRUE	TRUE	26.9515	28.7434	27.3357	26.7035	27.0149	27.3498	28.0973	29.1528	27.8933	27.4043	27.8675	28.083	TRUE	0.00443386	0.733251	1.66238	TRUE	TRUE		TRUE
Q96DA2	RAB39B	RAB39B	Ras-related protein Rab-39B	4	21.5163	21.3	20.7984	21.9857	21.8533	21.4907	22.052	22.0533	22.2952	22.6091	22.6068	22.3233	TRUE	0.00824491	0.832526	1.7808	TRUE	TRUE	20.4765	18.9342	20.7602	20.5152	20.6509	20.2674	21.5371	20.8143	21.3494	20.7153	20.5108	20.9854	TRUE	0.111534	0.718014	1.64492
O60784	TOM1	TOM1	Target of Myb protein 1	8	23.0324	23.1045	22.6606	23.5565	23.3872	23.1482	23.7657	23.9616	23.7865	24.0715	24.1588	23.9488	TRUE	0.00126936	0.800599	1.74182	TRUE	TRUE	21.9929	21.498	21.9008	22.1539	22.0736	21.9238	22.4736	21.8755	22.6424	22.0706	22.4542	22.3033	TRUE	0.0465887	0.379436	1.30083
Q15818	NPTX1	NPTX1	Neuronal pentraxin-1 (NP1) (Neuronal pentraxin I) (NP-I)	14	25.1145	25.1486	24.2912	25.4119	23.9869	24.7906	25.6251	25.4182	25.6599	26.088	24.9468	25.5476	TRUE	0.0162745	0.75696	1.68993	TRUE	TRUE	23.3496	22.6654	22.8462	23.3546	23.64	23.1712	23.9136	23.5366	23.6135	23.6898	24.35	23.8207	TRUE	0.00220645	0.649513	1.56864	TRUE	TRUE
O00299	CLIC1	CLIC1 G6 NCC27	Chloride intracellular channel protein 1 (Chloride channel ABP) (Nuclear chloride ion channel 27) (NCC27) (Regulatory nuclear chloride ion channel protein) (hRNCC)	7	21.2337	21.3905	22.9574	20.8552	20.5649	21.4003	22.4688	22.2297	22.9277	21.8204	21.3262	22.1546	TRUE	0.0235753	0.754239	1.68674	TRUE	TRUE	20.08	21.4835	19.9732	19.2772	19.531	20.069	21.3799	21.6865	20.6718	19.6147	20.3219	20.735	TRUE	0.0258059	0.665976	1.58664	TRUE	TRUE
O94806	PRKD3	PRKD3 EPK2 PRKCN	Serine/threonine-protein kinase D3 (EC 2.7.11.13) (Protein kinase C nu type) (Protein kinase EPK2) (nPKC-nu)	2	23.2463	22.4272	22.569	22.8819	22.6333	22.7515	23.4548	23.2159	23.8485	23.8522	23.0632	23.4869	TRUE	0.018115	0.735397	1.66486	TRUE	TRUE	22.0085	22.4246	22.4628	22.111	22.4677	22.2949	23.0533	22.469	22.5703	22.4699	22.0827	22.5291	TRUE	0.376238	0.23412	1.17619
P05230	FGF1	FGF1 FGFA	Fibroblast growth factor 1 (FGF-1) (Acidic fibroblast growth factor) (aFGF) (Endothelial cell growth factor) (ECGF) (Heparin-binding growth factor 1) (HBGF-1)	4	21.8103	21.1403	21.494	20.7118	21.6399	21.3592	22.1228	21.6793	22.0509	21.6478	22.9515	22.0904	TRUE	0.0142812	0.731193	1.66001	TRUE	TRUE	20.0348	21.7338	20.228	19.1378	17.8097	19.7888	21.6975	21.7797	22.015	18.6315	20.0795	20.8406	TRUE	0.123389	1.05181	2.07312
Q9P253	VPS18	VPS18 KIAA1475	Vacuolar protein sorting-associated protein 18 homolog (hVPS18)	9	21.5275	21.2333	21.1435	21.5577	21.2906	21.3505	21.9095	22.051	21.9231	22.413	21.9981	22.059	TRUE	0.0011427	0.708434	1.63403	TRUE	TRUE	20.235	20.3546	20.1023	20.5161	19.9608	20.2337	20.6277	20.5908	20.4156	20.7017	20.505	20.5681	TRUE	0.00608874	0.334389	1.26084
Q13938	CAPS	CAPS	Calcyphosin (Calcyphosine)	7	22.0293	21.71	23.4015	22.1784	20.4144	21.9467	22.6665	22.094	23.8512	23.2825	21.3721	22.6533	TRUE	0.00737767	0.70653	1.63187	TRUE	TRUE	20.1644	23.8713	19.1659	17.4188	19.1692	19.9579	20.9585	23.3635	19.8006	19.973	19.5279	20.7247	TRUE	0.20006	0.766791	1.70148
P16144	ITGB4	ITGB4	Integrin beta-4 (GP150) (CD antigen CD104)	10	20.5848	20.507	20.7764	20.6423	18.8143	20.265	21.054	20.7238	21.7396	21.6701	19.5942	20.9563	TRUE	0.0107158	0.691392	1.61484	TRUE	TRUE	18.4867	21.1106	18.4858	18.253	18.509	18.969	19.2079	20.8971	18.813	18.3982	18.6809	19.1994	TRUE	0.202531	0.230402	1.17316
Q9H0E2	TOLLIP	TOLLIP	Toll-interacting protein	13	24.1887	23.8723	24.1736	23.6886	23.9303	23.9707	24.8334	24.8641	24.2447	24.9405	24.3946	24.6555	TRUE	0.0289415	0.684766	1.60744	TRUE	TRUE	22.6807	21.9259	22.7857	23.5511	23.2209	22.8329	23.4164	22.9171	23.7303	23.5765	23.2356	23.3752	TRUE	0.0672703	0.542296	1.45629
Q9UBI6	GNG12	GNG12	Guanine nucleotide-binding protein G(I)/G(S)/G(O) subunit gamma-12	5	23.4033	22.7479	23.4909	23.085	22.2698	22.9994	24.286	23.468	24.1654	23.8464	22.5621	23.6656	TRUE	0.00260519	0.666213	1.5869	TRUE	TRUE	21.1203	23.2814	20.6412	20.399	21.7187	21.4321	21.4926	23.1258	21.3565	21.1675	21.667	21.7619	TRUE	0.158093	0.329756	1.2568
Q9Y2J8	PADI2	PADI2 KIAA0994 PAD2 PDI2	Protein-arginine deiminase type-2 (EC 3.5.3.15) (PAD-H19) (Peptidylarginine deiminase II) (Protein-arginine deiminase type II)	14	24.6159	24.414	24.9153	24.5179	23.6738	24.4274	25.258	25.1436	25.5584	25.3228	24.1838	25.0933	TRUE	0.000174868	0.665921	1.58658	TRUE	TRUE	23.4819	25.043	23.4265	22.7657	23.5147	23.6464	24.2345	25.0544	23.7752	23.7019	23.9634	24.1459	TRUE	0.0361313	0.499495	1.41372
P51178	PLCD1	PLCD1	1-phosphatidylinositol 4,5-bisphosphate phosphodiesterase delta-1 (EC 3.1.4.11) (Phosphoinositide phospholipase C-delta-1) (Phospholipase C-III) (PLC-III) (Phospholipase C-delta-1) (PLC-delta-1)	18	23.9601	23.5242	23.7014	23.2038	21.8692	23.2518	24.5795	23.9423	24.284	24.5154	22.238	23.9119	TRUE	0.0176718	0.660106	1.5802	TRUE	TRUE	21.9673	23.6445	22.0575	21.6481	22.4918	22.3618	22.807	23.4111	22.4549	22.0698	22.5339	22.6553	TRUE	0.183148	0.293479	1.22559
Q9Y4C0	NRXN3	NRXN3 C14orf60 KIAA0743	Neurexin-3 (Neurexin III-alpha) (Neurexin-3-alpha)	15	22.0681	22.1089	21.4583	22.5252	22.567	22.1455	23.1675	22.7198	22.3301	22.534	23.2337	22.797	TRUE	0.0232693	0.651475	1.57077	TRUE	TRUE	21.0356	21.3049	21.3209	21.2542	21.4588	21.2749	22.5553	20.8351	22.2035	22.5545	21.7859	21.9869	TRUE	0.118081	0.711996	1.63807
Q9H270	VPS11	VPS11 RNF108 PP3476	Vacuolar protein sorting-associated protein 11 homolog (hVPS11) (RING finger protein 108)	4	20.0542	20.653	20.4234	21.0359	20.2783	20.489	20.9068	21.3393	20.7331	21.7432	20.8351	21.1115	TRUE	0.00240939	0.622518	1.53956	TRUE	TRUE	19.2782	19.4172	19.4759	19.6385	19.4277	19.4475	19.7111	19.7569	20.2405	19.8173	19.3359	19.7723	TRUE	0.0832815	0.324836	1.25252
O15400	STX7	STX7	Syntaxin-7	9	24.0769	24.7873	23.7174	24.6772	23.7781	24.2074	24.9833	25.1098	24.7587	25.0943	24.173	24.8238	TRUE	0.0141828	0.616425	1.53307	TRUE	TRUE	22.8389	22.1175	22.1427	22.9152	23.0119	22.6052	22.9301	22.9616	22.7632	23.219	22.993	22.9734	TRUE	0.0846434	0.368175	1.29072
P14136	GFAP	GFAP	Glial fibrillary acidic protein (GFAP)	65	34.4718	34.0201	34.3952	34.1833	30.5542	33.5249	34.9509	34.6075	34.811	35.3311	30.9656	34.1332	TRUE	0.0117798	0.608322	1.52449	TRUE	TRUE	31.7546	34.5629	31.3423	30.1234	32.4692	32.0505	32.6269	33.9674	32.3651	31.0599	31.9442	32.3927	TRUE	0.406653	0.342209	1.2677				TRUE
P15559	NQO1	NQO1 DIA4 NMOR1	NAD(P)H dehydrogenase [quinone] 1 (EC 1.6.5.2) (Azoreductase) (DT-diaphorase) (DTD) (Menadione reductase) (NAD(P)H:quinone oxidoreductase 1) (Phylloquinone reductase) (Quinone reductase 1) (QR1)	6	23.7381	21.7648	21.8815	22.086	22.4658	22.3872	23.998	22.6311	22.7814	22.8284	22.7383	22.9955	TRUE	0.0128406	0.608214	1.52437	TRUE	TRUE	20.8125	23.3174	21.0579	21.932	17.1048	20.8449	21.4821	23.4189	21.7215	21.9764	17.7831	21.2764	TRUE	0.0422968	0.431487	1.34862
Q8TAT6	NPLOC4	NPLOC4 KIAA1499 NPL4	Nuclear protein localization protein 4 homolog (Protein NPL4)	3	20.2362	20.2383	19.3133	19.6475	18.5338	19.5938	20.3813	20.4542	20.0845	20.3985	19.6663	20.197	TRUE	0.0314609	0.603157	1.51904	TRUE	TRUE	18.9596	17.8147	19.1598	19.6438	19.8884	19.0933	19.9579	16.5176	18.3645	19.7492	19.8496	18.8877		0.629907	-0.205535	0.867217
Q99878	H2AC14	H2AC14 H2AFE HIST1H2AJ	Histone H2A type 1-J (Histone H2A/e)	6	24.2013	23.7465	24.3705	24.0686	22.9552	23.8684	25.0129	24.5838	24.8292	24.9406	22.9388	24.4611	TRUE	0.0249852	0.592613	1.50798	TRUE	TRUE	22.8956	24.2104	22.975	22.5827	22.5004	23.0328	23.2267	23.1217	22.9565	22.6153	22.8976	22.9636	TRUE	0.808465	-0.0692451	0.953137
O00391	QSOX1	QSOX1 QSCN6 UNQ2520/PRO6013	Sulfhydryl oxidase 1 (hQSOX) (EC 1.8.3.2) (Quiescin Q6)	2	21.2301	21.1024	21.9184	21.2365	21.2276	21.343	21.5446	21.6524	22.0873	22.2105	22.1394	21.9268	TRUE	0.0213577	0.583849	1.49884			20.2648	20.7727	19.5737	20.3653	20.2999	20.2553	18.0123	18.5196	19.2195	20.3262	20.3915	19.2938	TRUE	0.145097	-0.961459	0.513537
O00533	CHL1	CHL1 CALL	Neural cell adhesion molecule L1-like protein (Close homolog of L1) [Cleaved into: Processed neural cell adhesion molecule L1-like protein]	9	21.9486	21.2935	21.0867	21.4998	22.8647	21.7387	22.0301	22.1276	21.9263	22.334	23.1871	22.321	TRUE	0.0219318	0.582339	1.49728			21.7787	21.3772	21.5462	21.847	21.5411	21.618	22.0695	21.4305	21.9389	21.8243	21.7519	21.803	TRUE	0.0716312	0.184979	1.1368
Q92563	SPOCK2	SPOCK2 KIAA0275 TICN2 UNQ269/PRO306	Testican-2 (SPARC/osteonectin, CWCV, and Kazal-like domains proteoglycan 2)	4	19.0911	18.9167	21.6452	20.5406	19.6152	19.9618	23.4307	23.7157	24.1654	18.6866	23.7731	22.7543	TRUE	0.0845953	2.79252	6.9284			17.5558	18.0221	18.3479	20.5717	18.6917	18.6378	22.8387	21.4651	23.1695	21.2968	21.764	22.1068	TRUE	0.0123006	3.46898	11.0731	TRUE	TRUE	TRUE	TRUE
P31947	SFN	SFN HME1	14-3-3 protein sigma (Epithelial cell marker protein 1) (Stratifin)	16	28.0033	19.8416	27.8382	18.6859	27.0115	24.2761	26.3591	27.2957	27.0799	27.3611	27.0318	27.0255	TRUE	0.278469	2.74943	6.72453			25.9322	25.8203	26.6118	26.3741	26.7313	26.2939	26.9945	26.3031	26.3673	26.0903	26.6421	26.4795	TRUE	0.512814	0.18553	1.13724
Q9UNS2	COPS3	COPS3 CSN3	COP9 signalosome complex subunit 3 (SGN3) (Signalosome subunit 3) (JAB1-containing signalosome subunit 3)	4	18.1088	18.7942	19.5017	21.4721	18.2966	19.2347	21.804	22.0621	21.2906	20.8646	22.6934	21.7429	TRUE	0.0476358	2.50826	5.68933			20.4065	20.5023	20.913	20.9198	21.1861	20.7855	20.8893	20.9582	20.9487	21.0028	21.0035	20.9605	TRUE	0.244432	0.174945	1.12892
Q8N474	SFRP1	SFRP1 FRP FRP1 SARP2	Secreted frizzled-related protein 1 (FRP-1) (sFRP-1) (Secreted apoptosis-related protein 2) (SARP-2)	5	18.2513	20.9426	20.7917	18.8622	19.2573	19.621	24.3393	22.0159	22.1279	22.2805	19.3627	22.0253	TRUE	0.0874512	2.40424	5.29356			17.7147	18.0999	18.3844	19.8637	19.8195	18.7764	20.5459	18.8958	17.9967	18.7869	19.1638	19.0778		0.690937	0.30139	1.23233					TRUE
Q9H008	LHPP	LHPP	Phospholysine phosphohistidine inorganic pyrophosphate phosphatase (hLHPP) (EC 3.1.3.-) (EC 3.6.1.1)	5	23.2167	23.4046	18.9224	22.8418	18.9224	21.4616	24.1891	24.1641	23.4832	23.8211	23.3616	23.8038	TRUE	0.0566465	2.34225	5.07093			22.2998	23.0471	18.6702	20.8422	18.2786	20.6276	22.7368	23.0091	23.4991	21.515	22.1038	22.5728	TRUE	0.121399	1.94522	3.85095
P55058	PLTP	PLTP	Phospholipid transfer protein (Lipid transfer protein II)	2	21.003	19.3881	18.5138	18.7186	19.3836	19.4014	19.7825	21.9533	23.312	23.6246	19.1924	21.573	TRUE	0.159233	2.17154	4.50503			18.1428	17.7375	19.1709	18.6173	20.9321	18.9201	18.4835	20.8871	21.3584	20.9637	19.1543	20.1694	TRUE	0.231144	1.2493	2.37726
Q5TZA2	CROCC	CROCC KIAA0445	Rootletin (Ciliary rootlet coiled-coil protein)	4	18.8982	24.4692	19.8244	19.6382	19.6345	20.4929	21.9668	18.994	24.7635	24.9946	21.6014	22.464	TRUE	0.37172	1.97114	3.92077			21.3793	23.3613	22.3644	18.7096	22.4048	21.6439	18.5128	23.5173	19.3137	18.1599	19.0772	19.7162	TRUE	0.0551919	-1.92771	0.262845
Q9H299	SH3BGRL3	SH3BGRL3 P1725	SH3 domain-binding glutamic acid-rich-like protein 3 (SH3 domain-binding protein 1) (SH3BP-1)	3	22.9194	19.2075	18.2577	21.8548	22.769	21.0017	22.9306	22.6839	22.4852	23.4633	22.9981	22.9122	TRUE	0.087086	1.91054	3.7595			22.0906	22.1525	21.5995	22.1077	21.9094	21.9719	22.8269	21.6687	21.4592	21.1441	22.0065	21.8211	TRUE	0.624126	-0.150853	0.900718
P04004	VTN	VTN	Vitronectin (VN) (S-protein) (Serum-spreading factor) (V75) [Cleaved into: Vitronectin V65 subunit; Vitronectin V10 subunit; Somatomedin-B]	8	24.1386	19.775	23.5505	21.2614	23.7519	22.4955	24.5561	23.618	24.2016	24.8279	24.6441	24.3695	TRUE	0.0674305	1.87406	3.66563			21.813	22.7463	23.0474	23.0115	24.0527	22.9342	23.449	23.2542	23.3896	23.6817	23.7602	23.5069	TRUE	0.140228	0.572741	1.48735
Q9UJY1	HSPB8	HSPB8 CRYAC E2IG1 HSP22 PP1629	Heat shock protein beta-8 (HspB8) (Alpha-crystallin C chain) (E2-induced gene 1 protein) (Protein kinase H11) (Small stress protein-like protein HSP22)	2	19.2334	22.4489	18.4059	22.571	19.7168	20.4752	23.0847	22.3465	22.6036	23.4539	20.0413	22.306	TRUE	0.114769	1.83081	3.55736			18.3585	18.7745	18.0288	19.3034	21.5028	19.1936	20.9917	18.6191	18.374	17.6904	21.6913	19.4733		0.703044	0.279699	1.21394
P49006	MARCKSL1	MARCKSL1 MLP MRP	MARCKS-related protein (MARCKS-like protein 1) (Macrophage myristoylated alanine-rich C kinase substrate) (Mac-MARCKS) (MacMARCKS)	2	19.1515	22.5062	19.4282	20.0241	20.0539	20.2328	22.9848	22.3713	22.4327	22.5293	19.8648	22.0366	TRUE	0.0955035	1.8038	3.49138			21.9502	19.2493	19.0981	18.4341	18.2325	19.3928	18.1158	21.6881	21.9234	21.402	21.5463	20.9351	TRUE	0.317471	1.54227	2.91253
Q6UXX9	RSPO2	RSPO2 UNQ9384/PRO34209	R-spondin-2 (Roof plate-specific spondin-2) (hRspo2)	5	19.4577	20.1355	20.3871	20.3391	19.4966	19.9632	23.3135	21.4189	22.2435	22.0281	19.4236	21.6855	TRUE	0.0526909	1.72232	3.29968			18.7511	18.4896	18.5443	18.3252	18.431	18.5082	19.1886	18.0157	20.0714	18.0829	17.2842	18.5286		0.966408	0.0203362	1.0142
P02745	C1QA	C1QA	Complement C1q subcomponent subunit A	2	20.1783	20.7393	21.1599	19.8064	20.0222	20.3812	21.4445	20.0522	25.0689	24.0992	19.6141	22.0558	TRUE	0.185031	1.67456	3.19222			19.6495	20.655	18.2037	17.4569	18.6122	18.9154	21.1534	21.1751	20.4304	21.2938	18.2548	20.4615	TRUE	0.0985148	1.54609	2.92024
P17066	HSPA6	HSPA6 HSP70B'	Heat shock 70 kDa protein 6 (Heat shock 70 kDa protein B')	12	26.3196	19.3636	19.6783	19.5176	26.2087	22.2176	26.024	26.6123	20.0714	19.8259	26.6356	23.8338	TRUE	0.316847	1.61628	3.06584			25.9504	17.8102	25.1595	18.4491	25.4357	22.561	25.2867	25.4486	18.2649	25.3474	25.2792	23.9253	TRUE	0.638595	1.36435	2.5746
P02792	FTL	FTL	Ferritin light chain (Ferritin L subunit)	6	26.3052	21.7774	25.6211	23.9288	25.4608	24.6186	26.7961	26.1756	26.1021	26.2804	25.7273	26.2163	TRUE	0.114998	1.59768	3.02656			24.2495	25.6276	25.2986	24.5441	24.513	24.8466	26.6923	26.4411	26.304	25.1531	25.9991	26.1179	TRUE	0.0177069	1.27135	2.41387	TRUE	TRUE
Q9UM22	EPDR1	EPDR1 MERP1 UCC1	Mammalian ependymin-related protein 1 (MERP-1) (Upregulated in colorectal cancer gene 1 protein)	3	22.2078	19.0916	21.5825	22.7918	22.4941	21.6336	24.0984	22.5022	20.7345	23.5738	25.1772	23.2172	TRUE	0.101737	1.58363	2.99722			22.1583	21.2949	22.0911	18.0709	18.8624	20.4955	23.7849	22.5604	23.3144	22.4785	22.569	22.9414	TRUE	0.0218348	2.44589	5.44862	TRUE	TRUE
P35813	PPM1A	PPM1A PPPM1A	Protein phosphatase 1A (EC 3.1.3.16) (Protein phosphatase 2C isoform alpha) (PP2C-alpha) (Protein phosphatase IA)	5	18.7528	19.878	18.6859	20.4757	18.7084	19.3001	22.1096	20.0043	21.6284	19.1019	21.4864	20.8661	TRUE	0.167383	1.56597	2.96077			20.8709	20.8475	20.8661	21.3336	20.6233	20.9083	20.6504	20.8598	21.0515	21.045	20.9287	20.9071	TRUE	0.992086	-0.00120239	0.999167
Q9Y696	CLIC4	CLIC4	Chloride intracellular channel protein 4 (Intracellular chloride ion channel protein p64H1)	6	19.3691	18.1392	19.2456	23.9272	19.4968	20.0356	22.8054	20.0385	23.1903	23.5586	18.3466	21.5879	TRUE	0.198992	1.5523	2.93285			20.7055	23.3111	21.0782	19.8717	20.4129	21.0759	20.9731	22.5368	21.3627	19.8178	20.7708	21.0922	TRUE	0.941597	0.0163704	1.01141
O94772	LY6H	LY6H	Lymphocyte antigen 6H (Ly-6H)	4	20.1855	19.25	19.3586	24.1591	24.1093	21.4125	19.2509	23.5914	23.8927	24.0138	23.9359	22.937	TRUE	0.272185	1.52443	2.87673			22.4218	21.8798	21.6829	18.8983	17.8659	20.5497	22.0719	18.6014	21.9423	22.0965	21.9117	21.3248	TRUE	0.586996	0.775073	1.71128
Q9Y5L3	ENTPD2	ENTPD2 CD39L1	Ectonucleoside triphosphate diphosphohydrolase 2 (NTPDase 2) (EC 3.6.1.-) (CD39 antigen-like 1) (Ecto-ATP diphosphohydrolase 2) (Ecto-ATPDase 2) (Ecto-ATPase 2)	7	19.2483	19.2748	19.6096	19.4662	18.6981	19.2594	20.0878	21.8331	22.9963	19.2952	19.5432	20.7511		0.0819856	1.49173	2.81226			20.1776	23.2669	20.5099	19.4059	19.6789	20.6078	21.3185	22.4412	20.3366	19.445	19.5784	20.6239	TRUE	0.962053	0.0161034	1.01122
Q96MC5	BMERB1	BMERB1 C16orf45	bMERB domain-containing protein 1	2	21.5173	21.6451	18.6856	19.5073	18.923	20.0557	21.5431	21.5802	21.8154	22.5377	19.9043	21.4762	TRUE	0.113068	1.4205	2.67679			18.901	18.7142	19.0342	17.9385	17.5414	18.4259	18.0319	18.0217	17.4622	18.5911	18.7442	18.1702		0.64406	-0.255644	0.837613
Q9ULA0	DNPEP	DNPEP ASPEP DAP	Aspartyl aminopeptidase (EC 3.4.11.21)	6	21.9441	22.9121	20.1256	18.5883	21.4879	21.0116	22.9197	22.5823	22.428	22.211	21.9557	22.4193	TRUE	0.114602	1.40774	2.65322			20.6082	20.9779	20.7537	20.2968	20.5775	20.6428	20.8955	20.9453	19.5807	20.1881	21.1917	20.5602	TRUE	0.797492	-0.0825958	0.944357
P49674	CSNK1E	CSNK1E	Casein kinase I isoform epsilon (CKI-epsilon) (CKIe) (EC 2.7.11.1)	4	21.7149	21.6001	18.2997	21.8408	21.832	21.0575	22.1855	22.932	22.9269	22.799	21.4463	22.458	TRUE	0.177309	1.40047	2.63987			20.8324	20.3187	20.9225	21.226	21.0864	20.8772	21.1468	20.7267	21.8874	20.5238	21.0691	21.0707	TRUE	0.519041	0.193546	1.14357
P11182	DBT	DBT BCATE2	Lipoamide acyltransferase component of branched-chain alpha-keto acid dehydrogenase complex, mitochondrial (EC 2.3.1.168) (52 kDa mitochondrial autoantigen of primary biliary cirrhosis) (Branched chain 2-oxo-acid dehydrogenase complex component E2) (BCOADC-E2) (Branched-chain alpha-keto acid dehydrogenase complex component E2) (BCKAD-E2) (BCKADE2) (Dihydrolipoamide acetyltransferase component of …	5	22.2703	18.9894	20.2462	18.7356	22.6003	20.5684	21.7649	21.8451	21.8683	21.8699	22.4196	21.9536	TRUE	0.139198	1.38518	2.61204			21.7038	18.7744	18.5322	21.5347	18.2676	19.7625	21.5977	20.7223	21.6051	18.3616	21.0682	20.671	TRUE	0.478252	0.908418	1.87699
Q9Y2E4	DIP2C	DIP2C KIAA0934	Disco-interacting protein 2 homolog C (DIP2 homolog C)	6	19.09	19.9696	19.6288	18.6345	20.1169	19.488	21.5364	21.506	19.802	21.1706	19.9004	20.7831		0.0850187	1.29511	2.45396			20.2395	20.7539	20.0747	20.1934	20.4221	20.3367	20.3619	20.1661	20.2784	20.6931	20.7096	20.4418	TRUE	0.599004	0.10509	1.07556
Q4J6C6	PREPL	PREPL KIAA0436	Prolyl endopeptidase-like (EC 3.4.21.-) (Prolylendopeptidase-like)	7	22.1484	20.0178	21.8864	19.4812	21.6266	21.0321	23.0451	22.339	21.9734	22.0026	22.2708	22.3262	TRUE	0.0541668	1.29408	2.4522			21.9058	22.4883	22.0558	21.5202	21.2272	21.8395	21.7977	21.9433	21.7287	21.8556	21.5812	21.7813	TRUE	0.760738	-0.0581669	0.960484
Q13510	ASAH1	ASAH1 ASAH HSD-33 HSD33	Acid ceramidase (AC) (ACDase) (Acid CDase) (EC 3.5.1.23) (Acylsphingosine deacylase) (N-acylethanolamine hydrolase ASAH1) (EC 3.5.1.-) (N-acylsphingosine amidohydrolase) (Putative 32 kDa heart protein) (PHP32) [Cleaved into: Acid ceramidase subunit alpha; Acid ceramidase subunit beta]	8	21.5706	21.8331	24.265	21.7395	21.844	22.2505	24.1081	23.86	22.822	23.8983	22.9429	23.5263	TRUE	0.150952	1.27581	2.42134			21.7902	21.7845	21.4358	20.9068	20.9501	21.3735	22.5011	22.4614	22.2068	21.4988	21.8337	22.1004	TRUE	0.000117445	0.726899	1.65508	TRUE	TRUE		TRUE
P43003	SLC1A3	SLC1A3 EAAT1 GLAST GLAST1	Excitatory amino acid transporter 1 (Sodium-dependent glutamate/aspartate transporter 1) (GLAST-1) (Solute carrier family 1 member 3)	6	26.372	19.9594	25.5024	23.8859	25.8622	24.3164	25.8944	25.4335	24.4617	26.1899	25.9641	25.5887	TRUE	0.346557	1.27234	2.41553			23.7678	25.1069	24.658	24.2052	25.33	24.6136	24.9097	25.0428	25.1362	25.5195	25.3402	25.1897	TRUE	0.111723	0.576122	1.49084
Q14498	RBM39	RBM39 HCC1 RNPC2	RNA-binding protein 39 (CAPER alpha) (Hepatocellular carcinoma protein 1) (RNA-binding motif protein 39) (RNA-binding region-containing protein 2) (Splicing factor HCC1)	4	19.5631	17.0458	19.1031	19.3296	20.6269	19.1337	20.6185	20.6446	20.7345	18.8322	21.1559	20.3971	TRUE	0.137115	1.26341	2.40063			19.7639	19.5563	20.3711	19.5534	19.0219	19.6533	18.935	19.2609	19.8641	19.6068	19.0936	19.3521	TRUE	0.153125	-0.301265	0.811541
Q16849	PTPRN	PTPRN ICA3 ICA512	Receptor-type tyrosine-protein phosphatase-like N (R-PTP-N) (Islet cell antigen 512) (ICA 512) (Islet cell autoantigen 3) (PTP IA-2) [Cleaved into: ICA512-N-terminal fragment (ICA512-NTF); ICA512-transmembrane fragment (ICA512-TMF); ICA512-cleaved cytosolic fragment (ICA512-CCF)]	7	21.7574	22.6108	19.9224	21.8737	21.5813	21.5491	22.9285	22.4305	22.5749	23.2743	22.8479	22.8112	TRUE	0.048423	1.26213	2.3985			21.7727	20.2676	20.4296	20.7316	18.9547	20.4313	21.3787	20.5475	20.75	21.3869	20.8787	20.9883	TRUE	0.218307	0.557088	1.4713
O94813	SLIT2	SLIT2 SLIL3	Slit homolog 2 protein (Slit-2) [Cleaved into: Slit homolog 2 protein N-product; Slit homolog 2 protein C-product]	7	19.6227	20.5233	18.6076	20.8173	19.2049	19.7551	22.1119	17.7512	23.2321	22.2215	19.7601	21.0154	TRUE	0.35881	1.26022	2.39533			17.8899	17.9657	19.3339	18.7387	18.1938	18.4244	19.9019	18.2771	20.6001	18.3717	19.3221	19.2946	TRUE	0.101369	0.870178	1.82789			TRUE	TRUE	TRUE
Q92696	RABGGTA	RABGGTA	Geranylgeranyl transferase type-2 subunit alpha (EC 2.5.1.60) (Geranylgeranyl transferase type II subunit alpha) (Rab geranyl-geranyltransferase subunit alpha) (Rab GG transferase alpha) (Rab GGTase alpha) (Rab geranylgeranyltransferase subunit alpha)	8	19.1513	23.7027	23.5554	22.396	20.2098	21.803	22.3484	22.7171	23.4897	24.2561	22.4273	23.0477	TRUE	0.180868	1.24468	2.36967			21.7572	21.5014	21.5447	21.1003	21.1757	21.4159	21.171	21.9887	20.9835	21.1443	21.5909	21.3757	TRUE	0.870006	-0.0401989	0.972521
Q9NTI2	ATP8A2	ATP8A2 ATPIB	Phospholipid-transporting ATPase IB (EC 7.6.2.1) (ATPase class I type 8A member 2) (ML-1) (P4-ATPase flippase complex alpha subunit ATP8A2)	5	20.7206	18.5976	19.1508	19.3153	21.1023	19.7773	22.0895	21.2687	20.1349	21.5981	19.9759	21.0134	TRUE	0.136141	1.23607	2.35556			18.8834	17.9956	17.4722	18.143	17.6303	18.0249	18.9063	18.3325	18.4295	19.0334	19.0933	18.759		0.0434979	0.734094	1.66335
Q8IYB5	SMAP1	SMAP1	Stromal membrane-associated protein 1	4	22.4824	19.557	21.4296	20.5676	18.767	20.5607	21.818	22.1263	21.4677	22.1033	21.2866	21.7604	TRUE	0.140532	1.19965	2.29684			20.9525	20.751	20.7583	21.2711	21.1545	20.9775	17.6551	20.7488	20.9448	20.9342	20.6384	20.1843	TRUE	0.281653	-0.793229	0.577051
Q8WXA3	RUFY2	RUFY2 KIAA1537 RABIP4R	RUN and FYVE domain-containing protein 2 (Rab4-interacting protein related)	4	21.0376	21.4847	19.1956	21.676	19.5152	20.5818	22.2478	22.0985	22.0658	22.0253	20.3879	21.7651	TRUE	0.0565	1.18322	2.27083			18.1693	18.4119	18.1216	18.3557	19.4683	18.5053	20.0442	18.044	18.2542	17.0076	17.2322	18.1164		0.606857	-0.388902	0.763711
Q14019	COTL1	COTL1 CLP	Coactosin-like protein	8	22.9318	23.4284	19.2786	21.2579	23.9452	22.1684	23.5424	23.0849	23.6027	22.5464	23.8961	23.3345	TRUE	0.236558	1.16611	2.24406			23.5859	23.7802	23.3158	22.5376	23.1922	23.2823	23.3712	23.3838	23.4378	22.5739	22.6959	23.0925	TRUE	0.187399	-0.189829	0.87671
P19021	PAM	PAM	Peptidyl-glycine alpha-amidating monooxygenase (PAM) [Includes: Peptidylglycine alpha-hydroxylating monooxygenase (PHM) (EC 1.14.17.3); Peptidyl-alpha-hydroxyglycine alpha-amidating lyase (EC 4.3.2.5) (Peptidylamidoglycolate lyase) (PAL)]	4	20.6832	19.3448	20.1615	19.4113	20.5926	20.0387	21.2384	21.2377	20.4186	21.9784	21.0799	21.1906	TRUE	0.0647503	1.15192	2.2221			18.8791	18.8682	18.9358	19.7847	19.0943	19.1124	19.6814	18.939	19.0591	19.2551	19.9	19.3669	TRUE	0.36959	0.254499	1.19292
Q9Y623	MYH4	MYH4	Myosin-4 (Myosin heavy chain 2b) (MyHC-2b) (Myosin heavy chain 4) (Myosin heavy chain IIb) (MyHC-IIb) (Myosin heavy chain, skeletal muscle, fetal)	2	24.6346	25.4827	25.6543	25.4753	19.4724	24.1438	25.5345	25.2354	26.1282	26.71	22.8639	25.2944	TRUE	0.133518	1.15057	2.22002			22.1683	25.2062	22.5159	21.2914	22.9515	22.8266	22.5535	25.132	23.4368	23.0935	23.6334	23.5699	TRUE	0.0761197	0.743212	1.6739
Q9NRD5	PICK1	PICK1 PRKCABP	PRKCA-binding protein (Protein interacting with C kinase 1) (Protein kinase C-alpha-binding protein)	4	18.6148	20.2217	21.5046	21.0323	21.2109	20.5169	21.3533	21.4591	21.6323	21.5417	22.331	21.6635	TRUE	0.0621059	1.14662	2.21395			17.868	19.4869	20.1021	20.5644	20.3325	19.6708	20.1125	18.9099	20.6715	21.1059	19.8287	20.1257	TRUE	0.423018	0.454922	1.37071
P02788	LTF	LTF GIG12 LF	Lactotransferrin (Lactoferrin) (EC 3.4.21.-) (Growth-inhibiting protein 12) (Talalactoferrin) [Cleaved into: Lactoferricin-H (Lfcin-H); Kaliocin-1; Lactoferroxin-A; Lactoferroxin-B; Lactoferroxin-C]	15	20.1875	20.2372	19.6574	21.0128	21.982	20.6154	25.1624	20.4828	21.1257	22.1419	19.8635	21.7553	TRUE	0.375932	1.13985	2.20359			21.7994	20.2115	20.3837	21.1279	20.5443	20.8133	22.1974	20.9366	20.0338	21.6127	21.2619	21.2085	TRUE	0.115367	0.395119	1.31505			TRUE
Q9UHQ9	CYB5R1	CYB5R1 NQO3A2 UNQ3049/PRO9865	NADH-cytochrome b5 reductase 1 (b5R.1) (EC 1.6.2.2) (Humb5R2) (NAD(P)H:quinone oxidoreductase type 3 polypeptide A2)	2	18.937	22.7978	22.7216	18.7868	19.0325	20.4551	22.4038	22.5624	23.036	19.8952	20.0535	21.5902	TRUE	0.14719	1.13507	2.1963			22.0254	17.2447	21.5926	21.5925	21.2568	20.7424	21.4516	19.4614	21.685	21.2707	17.8416	20.3421	TRUE	0.67961	-0.400349	0.757675
O14558	HSPB6	HSPB6	Heat shock protein beta-6 (HspB6) (Heat shock 20 kDa-like protein p20)	4	23.3673	21.6276	20.4578	23.4209	21.7865	22.132	23.9465	22.6531	23.9459	24.0433	21.7165	23.2611	TRUE	0.140439	1.12905	2.18715			20.6943	21.7934	21.4996	17.5081	21.1599	20.5311	21.5227	22.3121	21.5027	20.6035	22.0264	21.5935	TRUE	0.116127	1.06242	2.08843
O94905	ERLIN2	ERLIN2 C8orf2 SPFH2 UNQ2441/PRO5003/PRO9924	Erlin-2 (Endoplasmic reticulum lipid raft-associated protein 2) (Stomatin-prohibitin-flotillin-HflC/K domain-containing protein 2) (SPFH domain-containing protein 2)	4	18.7691	20.0489	21.6775	17.9905	19.4345	19.5841	19.1605	19.5133	21.5714	21.7754	21.5324	20.7106		0.232341	1.12652	2.18332			20.6231	21.4886	20.2844	18.9832	20.1279	20.3015	20.4471	20.7505	20.3589	18.3094	17.8881	19.5508	TRUE	0.135363	-0.750677	0.594325
P05362	ICAM1	ICAM1	Intercellular adhesion molecule 1 (ICAM-1) (Major group rhinovirus receptor) (CD antigen CD54)	4	21.2745	21.1953	19.1054	20.5093	19.306	20.2781	22.0157	21.1651	22.3326	21.2859	20.1692	21.3937	TRUE	0.113294	1.11558	2.16683			17.7206	19.6378	19.0745	16.967	19.1266	18.5053	19.9977	19.8312	18.0892	19.4044	19.8155	19.4276	TRUE	0.226765	0.922313	1.89515			TRUE	TRUE	TRUE
Q96QE2	SLC2A13	SLC2A13	Proton myo-inositol cotransporter (H(+)-myo-inositol cotransporter) (Hmit) (H(+)-myo-inositol symporter) (Solute carrier family 2 member 13)	4	21.1697	21.7873	19.1223	21.7241	20.9685	20.9544	22.2963	22.4623	22.1362	21.8715	21.5794	22.0691	TRUE	0.0894426	1.11477	2.1656			19.8875	19.5904	19.1863	18.589	19.7948	19.4096	20.4815	20.705	20.6951	20.2143	19.8524	20.3896	TRUE	0.0286264	0.980037	1.97252	TRUE	TRUE
O95352	ATG7	ATG7 APG7L	Ubiquitin-like modifier-activating enzyme ATG7 (ATG12-activating enzyme E1 ATG7) (Autophagy-related protein 7) (APG7-like) (hAGP7) (Ubiquitin-activating enzyme E1-like protein)	6	23.3657	19.4043	19.7785	20.0764	18.7244	20.2699	24.016	23.5896	20.0697	19.784	19.4584	21.3835		0.230881	1.11367	2.16396			22.5935	22.6904	22.6352	18.1755	22.7743	21.7738	22.549	22.7333	22.4702	21.9368	22.5256	22.443	TRUE	0.436403	0.669159	1.59015
O60645	EXOC3	EXOC3 SEC6 SEC6L1	Exocyst complex component 3 (Exocyst complex component Sec6)	5	19.6046	19.2135	19.3029	18.5068	19.3876	19.2031	21.9988	19.376	19.8771	18.9179	21.3665	20.3073		0.0707869	1.1042	2.14979			19.7993	19.6687	18.1874	18.307	19.6616	19.1248	17.6608	16.8398	19.5282	19.4244	19.6226	18.6152	TRUE	0.579523	-0.509643	0.702396
Q69YW2	STUM	STUM C1orf95	Protein stum homolog	3	18.7408	19.6522	20.395	23.8746	23.649	21.2623	22.0326	22.4595	23.6645	20.386	23.2507	22.3587	TRUE	0.458116	1.09635	2.13813			22.5887	18.394	21.6809	23.0549	23.0585	21.7554	21.9442	21.9024	21.875	22.1405	21.7511	21.9226	TRUE	0.857067	0.167239	1.12291
Q04637	EIF4G1	EIF4G1 EIF4F EIF4G EIF4GI	Eukaryotic translation initiation factor 4 gamma 1 (eIF-4-gamma 1) (eIF-4G 1) (eIF-4G1) (p220)	3	20.3593	22.1852	19.5618	19.407	18.9206	20.0868	21.8582	22.061	22.1732	19.4539	20.3397	21.1772	TRUE	0.098158	1.09042	2.12936			18.429	18.5721	18.0021	18.9091	17.8526	18.353	17.7945	20.0189	18.9013	18.208	18.0566	18.5959		0.594804	0.242876	1.18335
Q9BRF8	CPPED1	CPPED1 CSTP1	Serine/threonine-protein phosphatase CPPED1 (EC 3.1.3.16) (Calcineurin-like phosphoesterase domain-containing protein 1) (Complete S-transactivated protein 1)	3	19.2421	20.6339	19.7515	18.0809	18.0916	19.16	20.0734	19.5565	19.349	21.005	21.2087	20.2385		0.273524	1.0785	2.11183			20.1307	20.828	20.3318	20.4398	19.8406	20.3142	20.1078	19.9466	20.2459	20.0922	19.6882	20.0161	TRUE	0.128049	-0.298054	0.813349
P01860	IGHG3	IGHG3	Immunoglobulin heavy constant gamma 3 (HDC) (Heavy chain disease protein) (Ig gamma-3 chain C region)	12	20.7372	23.5659	24.4291	22.9517	20.8492	22.5066	23.1869	23.4175	24.6883	24.482	22.1491	23.5848	TRUE	0.0809145	1.07815	2.11133			18.224	21.2251	21.5469	17.1541	17.7572	19.1814	21.3065	22.0256	22.5415	22.0804	18.6419	21.3192	TRUE	0.0589132	2.13774	4.40072
Q9Y296	TRAPPC4	TRAPPC4 SBDN CGI-104 HSPC172 PTD009	Trafficking protein particle complex subunit 4 (Hematopoietic stem/progenitor cell protein 172) (Synbindin) (TRS23 homolog)	3	18.8297	18.5448	18.9492	21.3077	21.675	19.8613	21.039	21.3682	21.6565	19.0646	21.5404	20.9337	TRUE	0.338299	1.07245	2.103			18.7259	16.9393	18.3521	20.9902	20.8906	19.1796	18.7367	21.1535	18.2562	20.7708	20.6476	19.913	TRUE	0.447393	0.733352	1.6625
Q9NUJ3	TCP11L1	TCP11L1	T-complex protein 11-like protein 1	2	19.1033	19.5192	18.9847	18.8305	19.4077	19.1691	20.4649	19.852	20.2135	20.3787	20.2734	20.2365		0.0076747	1.06742	2.09568			18.5133	18.1617	18.9024	19.0367	17.9516	18.5131	16.6744	18.9645	19.1718	20.0033	19.1992	18.8026	TRUE	0.629763	0.289488	1.22221
O95139	NDUFB6	NDUFB6	NADH dehydrogenase [ubiquinone] 1 beta subcomplex subunit 6 (Complex I-B17) (CI-B17) (NADH-ubiquinone oxidoreductase B17 subunit)	2	19.7537	23.2463	18.8046	18.7579	23.8146	20.8754	19.9504	22.98	19.7157	23.1368	23.9213	21.9408	TRUE	0.278309	1.06542	2.09278			17.4053	22.3781	20.2659	22.5105	18.0394	20.1198	21.7786	21.743	21.9649	22.5739	18.2238	21.2569	TRUE	0.272413	1.137	2.19924
P13796	LCP1	LCP1 PLS2	Plastin-2 (L-plastin) (LC64P) (Lymphocyte cytosolic protein 1) (LCP-1)	7	20.0077	19.3559	21.5935	20.2982	20.3914	20.3293	21.8293	21.2019	21.1242	21.3688	21.4475	21.3943	TRUE	0.0644814	1.065	2.09217			18.6679	19.6659	18.552	19.026	19.3419	19.0507	19.9074	19.979	20.4681	19.8109	20.1007	20.0532	TRUE	0.020943	1.00249	2.00346	TRUE	TRUE
Q96Q05	TRAPPC9	TRAPPC9 KIAA1882 NIBP T1	Trafficking protein particle complex subunit 9 (NIK- and IKBKB-binding protein) (Tularik gene 1 protein)	3	20.443	19.929	18.6837	21.3526	21.5817	20.398	21.5689	22.1367	21.7388	20.6409	21.1782	21.4527	TRUE	0.220691	1.05468	2.07726			18.3247	18.1885	17.7602	17.6139	20.0011	18.3777	17.7655	19.029	19.3688	18.7618	18.3638	18.6578		0.665221	0.280068	1.21425
Q9NXA8	SIRT5	SIRT5 SIR2L5	NAD-dependent protein deacylase sirtuin-5, mitochondrial (EC 2.3.1.-) (Regulatory protein SIR2 homolog 5) (SIR2-like protein 5)	3	19.9203	18.8572	20.35	18.6329	17.7909	19.1103	19.7449	19.335	19.8319	20.9329	20.9557	20.1601		0.21775	1.04982	2.07027			19.8441	20.304	17.2732	19.6689	19.4833	19.3147	19.3523	19.6637	18.061	18.3651	18.5866	18.8057	TRUE	0.22198	-0.508965	0.702726
O00560	SDCBP	SDCBP MDA9 SYCL	Syntenin-1 (Melanoma differentiation-associated protein 9) (MDA-9) (Pro-TGF-alpha cytoplasmic domain-interacting protein 18) (TACIP18) (Scaffold protein Pbp1) (Syndecan-binding protein 1)	6	21.5317	21.2689	21.1944	21.6368	19.0396	20.9343	21.8804	21.9834	21.95	22.3763	21.5749	21.953	TRUE	0.0578678	1.0187	2.02609			20.2071	20.1976	19.2714	19.8896	20.1122	19.9356	20.3052	20.1658	19.2603	20.324	20.584	20.1279	TRUE	0.152188	0.192282	1.14257
Q15274	QPRT	QPRT	Nicotinate-nucleotide pyrophosphorylase [carboxylating] (EC 2.4.2.19) (Quinolinate phosphoribosyltransferase [decarboxylating]) (QAPRTase) (QPRTase)	2	18.0492	19.2684	19.5843	20.5772	19.5873	19.4133	19.6875	18.5941	23.8986	19.9494	20.0285	20.4316		0.333258	1.01836	2.02562			17.462	21.933	20.972	20.3896	20.0958	20.1705	21.2269	18.6852	21.7995	17.5523	20.539	19.9606	TRUE	0.878883	-0.209943	0.864572
Q92529	SHC3	SHC3 NSHC SHCC	SHC-transforming protein 3 (Neuronal Shc) (N-Shc) (Protein Rai) (SHC-transforming protein C) (Src homology 2 domain-containing-transforming protein C3) (SH2 domain protein C3)	3	18.563	20.7836	18.6063	20.181	18.6162	19.35	20.1782	20.5373	20.443	20.4136	20.2564	20.3657	TRUE	0.0756382	1.01567	2.02184			18.0821	18.1446	20.0262	20.3888	19.8809	19.3045	17.5943	19.6274	20.1479	20.3004	19.5425	19.4425	TRUE	0.715082	0.137974	1.10036
P01903	HLA-DRA	HLA-DRA HLA-DRA1	HLA class II histocompatibility antigen, DR alpha chain (MHC class II antigen DRA)	3	18.7632	20.2508	19.3821	18.8935	19.2241	19.3027	20.8642	20.5673	19.6803	20.9847	19.4575	20.3108	TRUE	0.0858959	1.00805	2.0112			17.6126	18.3021	18.4165	18.7322	18.4619	18.3051	19.1331	18.6387	18.9655	19.758	19.063	19.1117	TRUE	0.0186227	0.80659	1.74907	TRUE	TRUE	TRUE	TRUE	TRUE
P17612	PRKACA	PRKACA PKACA	cAMP-dependent protein kinase catalytic subunit alpha (PKA C-alpha) (EC 2.7.11.11)	9	21.0493	19.9706	18.4043	19.398	20.5714	19.8787	21.6533	21.243	20.9646	20.1365	20.3387	20.8672	TRUE	0.098678	0.988503	1.98412			20.4652	20.2123	20.6915	20.2609	19.1631	20.1586	20.5239	20.092	20.6777	20.2876	20.4922	20.4147	TRUE	0.396519	0.256079	1.19423
O15530	PDPK1	PDPK1 PDK1	3-phosphoinositide-dependent protein kinase 1 (hPDK1) (EC 2.7.11.1)	4	19.1533	18.8851	19.0333	19.5728	19.6267	19.2543	20.3302	20.8365	18.7577	20.497	20.7827	20.2408	TRUE	0.0519006	0.98657	1.98147			19.2181	19.0704	19.2745	19.4411	19.5238	19.3056	18.9655	17.2485	19.1005	19.5409	19.4887	18.8688	TRUE	0.281875	-0.436747	0.738799
Q14515	SPARCL1	SPARCL1	SPARC-like protein 1 (High endothelial venule protein) (Hevin) (MAST 9)	4	21.6762	19.2464	20.272	20.3848	21.0986	20.5356	22.6445	21.6874	19.7568	21.7332	21.7178	21.5079	TRUE	0.113552	0.972337	1.96202			19.5353	19.7567	20.6628	20.6756	20.1149	20.1491	21.0452	20.0446	21.5689	21.1005	21.3478	21.0214	TRUE	0.0198594	0.872341	1.83063	TRUE	TRUE
Q969T9	WBP2	WBP2	WW domain-binding protein 2 (WBP-2)	2	20.4754	22.0913	21.9354	22.0051	19.8226	21.266	21.8822	22.0753	22.3127	22.3474	22.5221	22.2279	TRUE	0.123844	0.961985	1.94799			20.4393	20.3695	20.2168	21.4615	20.8907	20.6756	20.849	20.6491	21.1935	21.2406	20.524	20.8912	TRUE	0.419432	0.215656	1.16123
P42330	AKR1C3	AKR1C3 DDH1 HSD17B5 KIAA0119 PGFS	Aldo-keto reductase family 1 member C3 (EC 1.-.-.-) (17-beta-hydroxysteroid dehydrogenase type 5) (17-beta-HSD 5) (3-alpha-HSD type II, brain) (3-alpha-hydroxysteroid dehydrogenase type 2) (3-alpha-HSD type 2) (EC 1.1.1.357) (Chlordecone reductase homolog HAKRb) (Dihydrodiol dehydrogenase 3) (DD-3) (DD3) (Dihydrodiol dehydrogenase type I) (HA1753) (Indanol dehydrogenase) (EC 1.1.1.112) (Prostagla…	5	19.9832	22.1576	22.2254	20.4571	19.2297	20.8106	22.1934	19.6649	23.165	22.5963	21.2341	21.7707	TRUE	0.343031	0.96016	1.94553			20.8367	21.6195	20.3191	18.4943	17.541	19.7621	21.3096	22.0765	21.3886	21.098	20.6858	21.3117	TRUE	0.0501063	1.54956	2.92728
P07858	CTSB	CTSB CPSB	Cathepsin B (EC 3.4.22.1) (APP secretase) (APPS) (Cathepsin B1) [Cleaved into: Cathepsin B light chain; Cathepsin B heavy chain]	7	21.4086	20.8119	25.4321	19.5885	21.8703	21.8223	22.7586	22.2763	23.3287	23.4021	22.1368	22.7805	TRUE	0.374508	0.958211	1.9429			22.023	22.637	22.1317	21.6384	20.7303	21.8321	23.2856	22.4525	23.0767	21.6977	21.7931	22.4611	TRUE	0.095475	0.629045	1.54654
P07339	CTSD	CTSD CPSD	Cathepsin D (EC 3.4.23.5) [Cleaved into: Cathepsin D light chain; Cathepsin D heavy chain]	15	25.4526	25.419	27.8371	25.3665	25.3804	25.8911	27.1533	26.906	26.758	27.2185	26.1987	26.8469	TRUE	0.150597	0.955749	1.93959			24.7038	24.8511	24.4719	24.5381	24.2246	24.5579	26.0409	25.6793	25.5844	24.975	25.2937	25.5147	TRUE	0.0033362	0.956758	1.94094	TRUE	TRUE
Q9NZ72	STMN3	STMN3 SCLIP	Stathmin-3 (SCG10-like protein)	5	20.9528	21.4252	19.9848	20.7898	20.5526	20.741	21.4847	21.2172	21.7295	21.5686	22.4775	21.6955	TRUE	0.0732414	0.954448	1.93784			18.3266	18.584	19.3586	17.9083	19.0506	18.6456	20.4006	18.7629	18.1106	18.953	18.5727	18.96		0.616372	0.314311	1.24342
P04271	S100B	S100B	Protein S100-B (S-100 protein beta chain) (S-100 protein subunit beta) (S100 calcium-binding protein B)	1	24.4859	19.8215	23.96	23.0923	23.3444	22.9408	24.7236	23.7338	23.3873	24.7658	22.855	23.8931	TRUE	0.321538	0.952263	1.93491			21.7647	24.7118	21.3786	20.9215	22.2807	22.2115	22.761	24.223	22.2153	21.6767	22.9292	22.761	TRUE	0.107476	0.549561	1.46364
O95671	ASMTL	ASMTL	Probable bifunctional dTTP/UTP pyrophosphatase/methyltransferase protein [Includes: dTTP/UTP pyrophosphatase (dTTPase/UTPase) (EC 3.6.1.9) (Nucleoside triphosphate pyrophosphatase) (Nucleotide pyrophosphatase) (Nucleotide PPase); N-acetylserotonin O-methyltransferase-like protein (ASMTL) (EC 2.1.1.-)]	4	19.0017	18.6798	21.9784	20.1697	21.1565	20.1972	19.7358	22.2183	22.5769	21.6567	19.5363	21.1448	TRUE	0.317095	0.947572	1.92862			18.1066	19.5145	20.5648	18.769	18.0127	18.9935	17.8515	19.6501	20.8551	19.8467	19.2957	19.4998	TRUE	0.156834	0.506333	1.42043
P51572	BCAP31	BCAP31 BAP31 DXS1357E	B-cell receptor-associated protein 31 (BCR-associated protein 31) (Bap31) (6C6-AG tumor-associated antigen) (Protein CDM) (p28)	3	21.4334	18.7413	19.5697	18.8678	21.2533	19.9731	21.5748	19.5241	22.0614	20.3679	21.0744	20.9205		0.120459	0.947429	1.92843			20.4097	20.3917	18.3809	20.2965	16.8659	19.2689	20.5208	20.4484	20.4151	20.1322	20.365	20.3763	TRUE	0.197562	1.10735	2.15449
Q9Y2V2	CARHSP1	CARHSP1	Calcium-regulated heat-stable protein 1 (Calcium-regulated heat-stable protein of 24 kDa) (CRHSP-24)	4	18.9671	19.7835	18.856	21.1972	19.8202	19.7248	21.4773	20.8598	20.6906	21.0334	19.2787	20.6679	TRUE	0.178486	0.94312	1.92268			20.1257	19.2367	18.2555	20.0359	18.5466	19.2401	20.2805	19.0357	20.1041	20.035	17.527	19.3964	TRUE	0.75553	0.15639	1.1145
Q9Y3D6	FIS1	FIS1 TTC11 CGI-135	Mitochondrial fission 1 protein (FIS1 homolog) (hFis1) (Tetratricopeptide repeat protein 11) (TPR repeat protein 11)	3	19.2776	19.1855	19.1494	19.2483	19.4861	19.2694	19.2439	19.6125	19.839	22.4467	19.8365	20.1957		0.185294	0.926333	1.90044			20.7264	20.4221	21.2845	20.8089	20.9772	20.8438	21.1276	20.8867	20.9654	21.3126	20.6133	20.9811	TRUE	0.522742	0.137308	1.09985
Q01105	SET	SET	Protein SET (HLA-DR-associated protein II) (Inhibitor of granzyme A-activated DNase) (IGAAD) (PHAPII) (Phosphatase 2A inhibitor I2PP2A) (I-2PP2A) (Template-activating factor I) (TAF-I)	3	19.152	20.3076	17.9411	19.0878	19.8362	19.265	19.4408	21.8804	19.5703	20.0599	19.9281	20.1759		0.0454962	0.910933	1.88026			21.2746	20.83	22.2742	21.9139	21.8771	21.634	21.7906	21.3072	21.7718	21.8586	21.7075	21.6871	TRUE	0.799037	0.0531784	1.03755
O95295	SNAPIN	SNAPIN BLOC1S7 SNAP25BP SNAPAP	SNARE-associated protein Snapin (Biogenesis of lysosome-related organelles complex 1 subunit 7) (BLOC-1 subunit 7) (Synaptosomal-associated protein 25-binding protein) (SNAP-associated protein)	4	18.5697	19.0759	19.907	20.6588	19.145	19.4713	20.5522	21.053	18.609	21.0679	20.5614	20.3687	TRUE	0.220894	0.897437	1.86275			18.1975	20.0143	18.5345	18.5009	18.0257	18.6546	19.8783	17.9789	18.8403	19.7776	18.5007	18.9951		0.625763	0.340561	1.26625
Q96AX1	VPS33A	VPS33A	Vacuolar protein sorting-associated protein 33A (hVPS33A)	5	20.4657	21.6564	20.5309	21.5612	20.0155	20.8459	21.3187	21.8149	21.6139	21.8559	22.1123	21.7432	TRUE	0.0601366	0.897209	1.86246			19.9611	20.1664	19.5341	20.2594	19.9669	19.9776	20.3966	19.9091	20.5682	20.4676	19.5511	20.1785	TRUE	0.480886	0.200925	1.14944
Q96FZ7	CHMP6	CHMP6 VPS20	Charged multivesicular body protein 6 (Chromatin-modifying protein 6) (Vacuolar protein sorting-associated protein 20) (Vps20) (hVps20)	3	19.7977	22.0588	19.4073	22.0821	19.5422	20.5776	21.1555	21.8362	22.2393	22.0892	20.0485	21.4737	TRUE	0.181534	0.89611	1.86104			18.8928	18.1206	18.2028	18.1719	19.2571	18.529	20.1894	20.4042	18.9725	21.0776	20.0171	20.1322	TRUE	0.0199818	1.60313	3.03803	TRUE	TRUE
Q96JJ3	ELMO2	ELMO2 CED12A KIAA1834	Engulfment and cell motility protein 2 (Protein ced-12 homolog A) (hCed-12A)	7	18.929	22.4814	20.0917	22.421	20.2756	20.8397	21.3509	22.4199	21.666	21.8768	21.3539	21.7335	TRUE	0.172693	0.893743	1.85799			18.3056	20.5269	18.5797	20.3117	20.3955	19.6239	18.5125	20.4416	20.2193	18.2473	20.3259	19.5493	TRUE	0.905615	-0.0745781	0.94962
Q9NRX4	PHPT1	PHPT1 PHP14 CGI-202 HSPC141	14 kDa phosphohistidine phosphatase (EC 3.9.1.3) (Phosphohistidine phosphatase 1) (PHPT1) (Protein histidine phosphatase) (PHP) (Protein janus-A homolog)	4	21.9251	21.7424	21.3469	18.5171	19.232	20.5527	21.0304	21.4389	22.0495	21.2482	21.4517	21.4437	TRUE	0.272044	0.891061	1.85454			18.8007	21.5272	21.4661	20.0494	20.9481	20.5583	20.6961	21.3834	21.0124	20.8516	21.1195	21.0126	TRUE	0.336113	0.454283	1.3701
Q96RT7	TUBGCP6	TUBGCP6 GCP6 KIAA1669	Gamma-tubulin complex component 6 (GCP-6)	2	19.5657	19.1949	19.8353	19.8652	20.223	19.7368	19.7183	24.6458	19.1844	19.8526	19.718	20.6238		0.483809	0.886968	1.84929			18.6781	18.2126	22.6533	19.7682	22.4992	20.3623	17.5366	17.9664	22.8306	22.302	22.8511	20.6973	TRUE	0.610565	0.335055	1.26143
O43505	B4GAT1	B4GAT1 B3GNT1 B3GNT6	Beta-1,4-glucuronyltransferase 1 (EC 2.4.1.-) (I-beta-1,3-N-acetylglucosaminyltransferase) (iGnT) (N-acetyllactosaminide beta-1,3-N-acetylglucosaminyltransferase) (Poly-N-acetyllactosamine extension enzyme) (UDP-GlcNAc:betaGal beta-1,3-N-acetylglucosaminyltransferase 1)	3	18.8839	20.8993	20.1201	21.0216	20.9796	20.3809	20.9681	21.1975	21.2174	21.6147	21.3233	21.2642	TRUE	0.0564062	0.883312	1.84461			20.2392	19.7982	18.5207	20.4947	20.2803	19.8666	20.7335	19.6735	20.6306	20.1845	20.0242	20.2493	TRUE	0.447746	0.382639	1.30372
Q96GA7	SDSL	SDSL	Serine dehydratase-like (L-serine deaminase) (L-serine dehydratase/L-threonine deaminase) (L-threonine dehydratase) (TDH) (EC 4.3.1.19) (Serine dehydratase 2) (SDH 2) (EC 4.3.1.17)	3	17.9377	20.6355	19.1099	20.5629	20.4747	19.7441	20.702	20.5694	20.8814	20.842	20.1068	20.6203	TRUE	0.216906	0.876184	1.83551			18.3085	19.8435	19.3573	18.8766	19.3806	19.1533	18.3797	19.4999	17.1706	19.2019	19.0105	18.6525	TRUE	0.319772	-0.500777	0.706726
Q8WX93	PALLD	PALLD KIAA0992 CGI-151	Palladin (SIH002) (Sarcoma antigen NY-SAR-77)	4	19.2803	21.1161	19.0915	21.0207	19.1573	19.9332	21.3934	20.2551	22.4312	21.1643	18.7662	20.8021	TRUE	0.337823	0.868871	1.82623			17.7915	18.878	18.0483	18.4104	18.3174	18.2891	20.9163	17.4844	18.3612	17.7675	18.0038	18.5067		0.793433	0.217526	1.16274
P62854	RPS26	RPS26	40S ribosomal protein S26 (Small ribosomal subunit protein eS26)	2	22.6647	22.2252	20.3939	18.1723	22.4186	21.1749	22.0789	22.7301	19.6651	22.9215	22.8029	22.0397	TRUE	0.436904	0.864811	1.8211			21.0841	21.4172	21.9522	21.4001	21.549	21.4805	21.476	21.5049	21.8938	21.3758	21.3558	21.5213	TRUE	0.700504	0.0407536	1.02865
O96033	MOCS2	MOCS2 MOCO1	Molybdopterin synthase sulfur carrier subunit (MOCO1-A) (Molybdenum cofactor synthesis protein 2 small subunit) (Molybdenum cofactor synthesis protein 2A) (MOCS2A) (Molybdopterin-synthase small subunit) (Sulfur carrier protein MOCS2A)	3	20.6157	19.3215	18.2831	18.4929	18.5478	19.0522	19.7542	19.6234	19.8445	20.1707	20.1897	19.9165		0.160443	0.864312	1.82047			17.6318	20.3861	19.5303	18.6316	18.275	18.891	19.8503	19.6582	18.9256	18.239	19.2647	19.1876	TRUE	0.630608	0.296611	1.22826
O43396	TXNL1	TXNL1 TRP32 TXL TXNL	Thioredoxin-like protein 1 (32 kDa thioredoxin-related protein)	6	22.4166	19.556	22.2946	18.8775	22.1415	21.0572	22.238	22.1379	21.6684	21.6146	21.9393	21.9196	TRUE	0.307692	0.862394	1.81805			22.0275	21.8723	21.931	21.342	21.5856	21.7517	21.6709	21.9226	21.4382	21.3513	21.444	21.5654	TRUE	0.149768	-0.186274	0.878873
Q5T0D9	TPRG1L	TPRG1L FAM79A MOVER	Tumor protein p63-regulated gene 1-like protein (Mossy fiber terminal-associated vertebrate-specific presynaptic protein) (Protein FAM79A)	4	22.1687	21.2177	19.5063	22.0451	21.6749	21.3225	22.4274	22.641	21.599	22.1441	22.1033	22.183	TRUE	0.0891032	0.860406	1.81555			21.2533	21.1765	21.0169	21.0449	21.7679	21.2519	21.3925	21.2594	20.8494	20.8659	21.3042	21.1343	TRUE	0.336439	-0.117603	0.921718
Q9BRX8	PRXL2A	PRXL2A C10orf58 FAM213A PAMM PRO2290 PSEC0139 UNQ611/PRO1198	Peroxiredoxin-like 2A (Peroxiredoxin-like 2 activated in M-CSF stimulated monocytes) (Protein PAMM) (Redox-regulatory protein FAM213A)	5	21.4511	18.4816	21.106	19.9173	21.7793	20.5471	21.0348	21.0276	21.6304	21.6966	21.6432	21.4065	TRUE	0.203915	0.85946	1.81436			20.9776	20.2644	20.7478	20.1536	20.0182	20.4323	21.418	21.0182	20.7808	21.2393	20.4723	20.9857	TRUE	0.0344784	0.553396	1.46754
P23229	ITGA6	ITGA6	Integrin alpha-6 (CD49 antigen-like family member F) (VLA-6) (CD antigen CD49f) [Cleaved into: Integrin alpha-6 heavy chain; Integrin alpha-6 light chain; Processed integrin alpha-6 (Alpha6p)]	5	20.3593	19.6717	17.6798	19.7762	18.9269	19.2828	19.7017	20.9969	19.4185	21.3418	19.2453	20.1408		0.130368	0.858086	1.81263			19.7536	20.9139	19.1396	19.6013	18.1061	19.5029	19.9502	20.7934	19.9993	17.272	18.4316	19.2893	TRUE	0.718541	-0.213596	0.862385
P01009	SERPINA1	SERPINA1 AAT PI PRO0684 PRO2209	Alpha-1-antitrypsin (Alpha-1 protease inhibitor) (Alpha-1-antiproteinase) (Serpin A1) [Cleaved into: Short peptide from AAT (SPAAT)]	5	18.7431	19.7953	20.7531	20.1733	22.9511	20.4832	21.9154	19.7069	20.9945	20.1012	23.9272	21.3291	TRUE	0.239596	0.845859	1.79733			17.4144	21.7254	21.9108	20.3721	21.5201	20.5885	21.908	21.8387	21.6705	20.8887	21.9307	21.6473	TRUE	0.28989	1.05878	2.08318
Q7RTP6	MICAL3	MICAL3 KIAA0819 KIAA1364	[F-actin]-monooxygenase MICAL3 (EC 1.14.13.225) (Molecule interacting with CasL protein 3) (MICAL-3)	6	18.4947	19.3801	20.6262	19.9353	20.2261	19.7325	24.0148	19.9583	19.5072	18.8661	20.5431	20.5779		0.526203	0.845415	1.79678			19.2493	19.061	19.5342	20.027	18.9053	19.3554	19.5872	19.2885	19.4945	20.2313	19.7125	19.6628	TRUE	0.0919642	0.307432	1.2375
P16389	KCNA2	KCNA2	Potassium voltage-gated channel subfamily A member 2 (NGK1) (Voltage-gated K(+) channel HuKIV) (Voltage-gated potassium channel HBK5) (Voltage-gated potassium channel subunit Kv1.2)	4	20.5153	18.7371	19.8482	19.7485	18.9464	19.5591	20.4325	20.3935	19.2039	20.5113	21.4796	20.4041	TRUE	0.215067	0.845046	1.79632			19.8068	19.7598	21.0555	20.1132	19.7617	20.0994	20.6515	19.5469	20.7473	20.7394	20.6551	20.468	TRUE	0.231009	0.36864	1.29113
Q15233	NONO	NONO NRB54	Non-POU domain-containing octamer-binding protein (NonO protein) (54 kDa nuclear RNA- and DNA-binding protein) (55 kDa nuclear protein) (DNA-binding p52/p100 complex, 52 kDa subunit) (NMT55) (p54(nrb)) (p54nrb)	8	19.1903	18.7516	22.7143	21.9532	22.2547	20.9728	21.893	22.451	21.9355	21.9265	20.8794	21.8171	TRUE	0.445279	0.844235	1.79531			21.3059	21.3635	22.017	21.9598	21.031	21.5354	20.9902	20.7297	21.1985	22.0792	21.261	21.2517	TRUE	0.23754	-0.283697	0.821483
Q9Y394	DHRS7	DHRS7 DHRS7A RETSDR4 SDR34C1 CGI-86 UNQ285/PRO3448	Dehydrogenase/reductase SDR family member 7 (EC 1.1.-.-) (Retinal short-chain dehydrogenase/reductase 4) (retSDR4) (Short chain dehydrogenase/reductase family 34C member 1)	2	21.4572	19.1403	21.1759	18.8788	19.4549	20.0214	21.3312	20.2749	21.9695	18.6283	22.1042	20.8617	TRUE	0.183882	0.840217	1.79032			19.0212	20.0551	19.471	20.2123	20.3554	19.823	20.8644	20.2128	21.1793	20.2875	20.3955	20.5879	TRUE	0.138146	0.764878	1.69923
Q96DG6	CMBL	CMBL	Carboxymethylenebutenolidase homolog (EC 3.1.-.-)	4	22.9065	22.9413	21.8448	22.2982	19.2272	21.8436	23.2787	22.3851	22.6679	22.5958	22.4782	22.6811	TRUE	0.262814	0.837536	1.787			21.2754	21.5465	21.3352	21.2993	21.3979	21.3709	21.7391	18.9024	21.4454	21.3348	20.9857	20.8815	TRUE	0.42877	-0.489398	0.712322
Q86VS8	HOOK3	HOOK3	Protein Hook homolog 3 (h-hook3) (hHK3)	2	23.1888	23.5881	23.0217	23.7138	18.7887	22.4602	22.9554	23.4157	23.3894	23.7284	22.9962	23.297	TRUE	0.380188	0.836817	1.7861			18.3273	18.6351	18.6407	22.0404	22.1887	19.9664	21.7599	21.6662	22.008	22.073	22.2451	21.9504	TRUE	0.0670192	1.98401	3.95591
P42858	HTT	HTT HD IT15	Huntingtin (Huntington disease protein) (HD protein) [Cleaved into: Huntingtin, myristoylated N-terminal fragment]	7	21.337	21.5325	17.6913	21.5097	21.2697	20.668	21.2805	22.1251	21.1823	21.4239	21.5117	21.5047	TRUE	0.282781	0.836688	1.78595			20.1001	19.5133	21.377	21.5127	20.1879	20.5382	20.2734	20.1115	21.2283	21.23	19.9956	20.5678	TRUE	0.863717	0.0295742	1.02071
P11441	UBL4A	UBL4A DXS254E GDX UBL4	Ubiquitin-like protein 4A (Ubiquitin-like protein GDX)	3	19.6061	21.7414	19.0391	21.9313	19.6981	20.4032	20.6979	21.712	21.2385	21.3365	21.2138	21.2397	TRUE	0.175646	0.836541	1.78576			20.1468	19.7634	20.5685	20.6854	20.8354	20.3999	19.0744	20.0136	20.5118	20.3067	20.0622	19.9938	TRUE	0.163017	-0.406149	0.754635
Q9Y3C8	UFC1	UFC1 CGI-126 HSPC155	Ubiquitin-fold modifier-conjugating enzyme 1 (Ufm1-conjugating enzyme 1)	2	21.6444	21.8709	19.5922	21.7213	20.0504	20.9758	21.5746	21.9122	21.8551	21.7385	21.9562	21.8073	TRUE	0.181659	0.831497	1.77953			20.8253	18.5803	20.6124	21.0448	20.8426	20.3811	21.0391	20.924	20.9534	20.5852	20.7715	20.8546	TRUE	0.386229	0.473539	1.38851
Q15493	RGN	RGN SMP30	Regucalcin (RC) (Gluconolactonase) (GNL) (EC 3.1.1.17) (Senescence marker protein 30) (SMP-30)	2	18.4765	18.8671	19.8	18.0953	19.8925	19.0263	19.442	19.8926	19.6903	19.3661	20.886	19.8554		0.0262565	0.829087	1.77656			19.3467	19.7447	17.4684	17.1238	19.5689	18.6505	19.4754	19.6048	17.9366	19.7919	20.1197	19.3857	TRUE	0.214509	0.735154	1.66458
P48539	PCP4	PCP4 PEP19	Calmodulin regulator protein PCP4 (Brain-specific polypeptide PEP-19) (Purkinje cell protein 4)	2	22.0706	22.0753	18.248	23.8757	19.878	21.2295	21.959	21.9917	21.8875	22.2872	22.1052	22.0461	TRUE	0.430906	0.816613	1.76127			17.8464	18.6528	19.3326	17.7918	19.1327	18.5513	18.664	17.6222	19.4485	17.8367	20.6551	18.8453		0.528135	0.29402	1.22605
P17152	TMEM11	TMEM11 C17orf35 PM1	Transmembrane protein 11, mitochondrial (Protein PM1) (Protein PMI)	2	21.2093	19.3493	18.8875	21.0346	21.302	20.3565	21.002	20.9744	21.0194	21.327	21.5235	21.1693	TRUE	0.14562	0.81272	1.75652			19.9012	20.4377	21.0043	21.2221	20.4406	20.6012	20.688	20.5587	21.2054	20.6641	20.7554	20.7743	TRUE	0.468026	0.173152	1.12752
P43378	PTPN9	PTPN9	Tyrosine-protein phosphatase non-receptor type 9 (EC 3.1.3.48) (Protein-tyrosine phosphatase MEG2) (PTPase MEG2)	2	18.6905	20.9182	19.2006	19.6897	18.2383	19.3474	19.1167	19.7918	20.6406	20.5731	20.6504	20.1545		0.240427	0.807064	1.74965			18.3656	19.2464	18.8248	18.8929	18.1215	18.6902	19.1172	19.1269	18.4771	19.1238	18.7733	18.9237	TRUE	0.334295	0.233448	1.17564
O15143	ARPC1B	ARPC1B ARC41	Actin-related protein 2/3 complex subunit 1B (Arp2/3 complex 41 kDa subunit) (p41-ARC)	4	19.319	20.8638	19.9763	20.8031	20.128	20.218	20.9411	21.2466	22.0857	21.8699	18.9711	21.0229	TRUE	0.229828	0.804855	1.74697			19.0249	19.1067	16.9104	18.6804	18.7647	18.4974	20.3248	19.6572	19.3535	19.1286	19.162	19.5252	TRUE	0.0577588	1.0278	2.03891			TRUE
Q6IQ22	RAB12	RAB12	Ras-related protein Rab-12	5	22.2534	22.2991	19.0762	22.5609	22.2076	21.6794	22.2059	22.4246	22.4206	22.6967	22.6676	22.4831	TRUE	0.277873	0.803627	1.74548			21.1526	21.1443	21.1349	20.8635	21.0536	21.0698	21.2824	20.8508	21.1442	20.926	20.6996	20.9806	TRUE	0.414831	-0.0891914	0.940049
O60883	GPR37L1	GPR37L1 ETBRLP2	G-protein coupled receptor 37-like 1 (Endothelin B receptor-like protein 2) (ETBR-LP-2)	4	22.9147	23.3305	20.0584	23.4072	22.6953	22.4812	22.921	23.1159	23.5989	23.8452	22.9344	23.2831	TRUE	0.311844	0.801873	1.74336			22.0271	22.5223	21.856	22.0875	21.522	22.003	22.3691	22.4251	22.5182	22.458	22.416	22.4373	TRUE	0.0600887	0.43429	1.35125
O95716	RAB3D	RAB3D GOV RAB16	Ras-related protein Rab-3D	7	23.0605	23.7487	20.501	23.6819	19.8184	22.1621	22.592	22.9892	23.047	22.8651	23.2497	22.9486	TRUE	0.436986	0.786511	1.7249			18.5269	17.6974	19.0419	22.8887	22.712	20.1734	22.7568	22.454	18.1394	18.0446	22.2523	20.7294	TRUE	0.770529	0.556025	1.47021
O43143	DHX15	DHX15 DBP1 DDX15	Pre-mRNA-splicing factor ATP-dependent RNA helicase DHX15 (EC 3.6.4.13) (ATP-dependent RNA helicase #46) (DEAH box protein 15)	3	19.3231	18.1989	18.9607	19.1787	19.6568	19.0636	20.2586	20.3237	20.0429	18.7186	19.8951	19.8478		0.144598	0.784152	1.72208			19.877	19.883	20.0381	19.6892	19.2967	19.7568	18.568	19.5262	19.7348	19.7521	19.5508	19.4264	TRUE	0.287851	-0.330416	0.795307
Q9H3Z4	DNAJC5	DNAJC5 CLN4	DnaJ homolog subfamily C member 5 (Ceroid-lipofuscinosis neuronal protein 4) (Cysteine string protein) (CSP)	6	23.8719	23.407	23.099	23.2975	23.6582	23.4667	23.8328	23.996	24.8006	24.2782	24.3316	24.2479	TRUE	0.0511459	0.781124	1.71847			22.9495	22.6768	22.9762	23.5146	22.8631	22.9961	23.6535	23.1732	23.7267	23.2723	23.2221	23.4096	TRUE	0.0815504	0.413507	1.33192
Q9UPQ0	LIMCH1	LIMCH1 KIAA1102	LIM and calponin homology domains-containing protein 1	3	18.5654	20.0703	19.2335	20.2037	20.2383	19.6623	20.8837	20.4682	20.2627	20.3584	20.2379	20.4422	TRUE	0.138814	0.779918	1.71703			19.2161	18.9765	18.6512	18.2315	17.4158	18.4982	18.6917	20.043	18.6915	19.3343	18.5174	19.0556		0.174902	0.557336	1.47155
P13473	LAMP2	LAMP2	Lysosome-associated membrane glycoprotein 2 (LAMP-2) (Lysosome-associated membrane protein 2) (CD107 antigen-like family member B) (LGP-96) (CD antigen CD107b)	2	21.0695	20.9015	21.6372	20.5311	18.7213	20.5721	22.6171	21.5246	19.2464	21.8291	21.4997	21.3434	TRUE	0.422469	0.771285	1.70679			18.5932	17.0712	17.8773	19.1396	18.6851	18.2733	17.9061	18.8007	20.8958	18.5769	17.8235	18.8006		0.537253	0.527341	1.44127
Q9UBV8	PEF1	PEF1 ABP32 UNQ1845/PRO3573	Peflin (PEF protein with a long N-terminal hydrophobic domain) (Penta-EF hand domain-containing protein 1)	2	19.9717	19.3879	19.6018	21.2795	19.2693	19.902	19.5019	21.0626	21.2373	22.1025	19.4458	20.67	TRUE	0.13856	0.767959	1.70286			20.5294	19.1518	20.3319	20.6437	20.8448	20.3003	19.0782	19.6502	17.9695	20.6989	18.0036	19.0801	TRUE	0.135684	-1.22024	0.429212
P10253	GAA	GAA	Lysosomal alpha-glucosidase (EC 3.2.1.20) (Acid maltase) (Aglucosidase alfa) [Cleaved into: 76 kDa lysosomal alpha-glucosidase; 70 kDa lysosomal alpha-glucosidase]	4	20.3729	19.9063	21.5977	20.6986	20.0073	20.5166	21.8922	21.3117	20.6599	22.0324	20.5255	21.2843	TRUE	0.171655	0.767767	1.70263			19.1772	19.2978	20.1065	19.0387	19.5079	19.4256	20.1629	19.3545	20.1659	19.9157	19.8069	19.8812	TRUE	0.0848702	0.455577	1.37133
Q9NX00	TMEM160	TMEM160	Transmembrane protein 160	2	20.4944	19.8965	19.4926	19.8391	20.9125	20.127	20.9393	21.4893	20.5254	20.8288	20.6582	20.8882	TRUE	0.0713211	0.761208	1.69491			18.5064	18.0139	19.1474	20.6596	19.7913	19.2237	19.9071	17.2271	19.9538	20.3006	18.1938	19.1165	TRUE	0.852498	-0.107276	0.928339
O75376	NCOR1	NCOR1 KIAA1047	Nuclear receptor corepressor 1 (N-CoR) (N-CoR1)	2	25.0051	23.3564	23.7258	24.3604	18.8309	23.0557	25.1548	24.9506	24.6337	23.1791	21.1304	23.8097	TRUE	0.278089	0.753985	1.68644			23.8148	24.251	22.8731	22.422	23.6038	23.3929	21.4495	24.04	23.3346	22.1608	22.1294	22.6229	TRUE	0.202981	-0.770083	0.586384
O75044	SRGAP2	SRGAP2 ARHGAP34 FNBP2 KIAA0456 SRGAP2A	SLIT-ROBO Rho GTPase-activating protein 2 (srGAP2) (Formin-binding protein 2) (Rho GTPase-activating protein 34)	5	21.5564	21.8036	19.5023	22.1645	19.7599	20.9574	21.4777	22.1993	21.889	22.2255	20.7549	21.7093	TRUE	0.169061	0.751915	1.68403			18.4719	18.1374	19.4157	20.2275	18.4848	18.9475	19.7111	18.0036	17.7483	17.7385	18.2939	18.2991		0.375314	-0.648384	0.637995
P16112	ACAN	ACAN AGC1 CSPG1 MSK16	Aggrecan core protein (Cartilage-specific proteoglycan core protein) (CSPCP) (Chondroitin sulfate proteoglycan core protein 1) (Chondroitin sulfate proteoglycan 1) [Cleaved into: Aggrecan core protein 2]	3	20.529	19.463	18.8608	19.1848	19.5353	19.5146	21.1891	20.0967	20.2383	19.9182	19.8769	20.2638		0.0117769	0.749238	1.6809			19.5199	19.3513	22.2249	19.5606	18.5543	19.8422	19.3721	18.2906	21.7441	19.4175	19.3493	19.6347	TRUE	0.528889	-0.207484	0.866046
Q9Y6R7	FCGBP	FCGBP	IgGFc-binding protein (Fcgamma-binding protein antigen) (FcgammaBP)	4	21.5593	21.3455	21.7801	19.5365	19.8004	20.8044	21.4893	21.9708	22.8713	22.1137	19.3223	21.5535	TRUE	0.231563	0.749106	1.68075			19.9885	18.2903	18.6202	20.7716	18.561	19.2463	21.4633	17.3371	18.9767	20.9391	17.8247	19.3082		0.893491	0.0618511	1.0438
P02689	PMP2	PMP2	Myelin P2 protein (Peripheral myelin protein 2)	3	20.3248	21.5643	19.0618	22.208	21.797	20.9912	20.597	21.7371	22.62	22.4269	21.3092	21.738	TRUE	0.35598	0.74686	1.67814			20.6567	21.254	22.3298	19.515	20.1514	20.7814	20.8996	20.2773	21.8163	19.5506	19.8337	20.4755	TRUE	0.225076	-0.305893	0.808942
P01861	IGHG4	IGHG4	Immunoglobulin heavy constant gamma 4 (Ig gamma-4 chain C region)	7	20.0327	19.578	19.4404	20.5246	19.0993	19.735	20.6432	19.903	20.0364	20.1302	21.6951	20.4816		0.207492	0.746553	1.67778			19.2449	21.2129	21.0976	18.4877	22.4452	20.4977	20.588	21.1354	22.9879	18.1163	23.1744	21.2004	TRUE	0.172219	0.702739	1.62759
P21817	RYR1	RYR1 RYDR	Ryanodine receptor 1 (RYR-1) (RyR1) (Skeletal muscle calcium release channel) (Skeletal muscle ryanodine receptor) (Skeletal muscle-type ryanodine receptor) (Type 1 ryanodine receptor)	4	21.8044	20.6421	19.316	20.0478	20.041	20.3703	18.7919	21.8267	21.759	21.5237	21.6735	21.115	TRUE	0.482163	0.744697	1.67562			17.9307	17.6211	21.7139	17.5394	18.4717	18.6553	19.6954	17.722	19.5646	17.5457	17.5294	18.4114		0.724739	-0.243912	0.844453
P07948	LYN	LYN JTK8	Tyrosine-protein kinase Lyn (EC 2.7.10.2) (Lck/Yes-related novel protein tyrosine kinase) (V-yes-1 Yamaguchi sarcoma viral related oncogene homolog) (p53Lyn) (p56Lyn)	3	19.7248	19.7093	18.8927	20.1899	19.6973	19.6428	20.0372	20.9748	20.4798	20.9692	19.4175	20.3757	TRUE	0.0925526	0.732906	1.66198			17.8761	17.6353	17.5262	19.1735	18.8695	18.2161	18.922	19.4623	19.9463	18.4381	17.8704	18.9278		0.355454	0.711672	1.6377
Q9BSJ8	ESYT1	ESYT1 FAM62A KIAA0747 MBC2	Extended synaptotagmin-1 (E-Syt1) (Membrane-bound C2 domain-containing protein)	10	22.176	19.1817	21.9171	21.3759	22.9837	21.5269	22.7883	21.7218	22.4653	21.9037	22.3761	22.251	TRUE	0.226848	0.724164	1.65194			21.1943	20.2288	21.9144	21.7753	20.791	21.1808	22.0483	21.6145	21.8303	22.2265	21.4687	21.8377	TRUE	0.0526855	0.65692	1.57671
P28799	GRN	GRN	Progranulin (PGRN) (Acrogranin) (Epithelin precursor) (Glycoprotein of 88 Kda) (GP88) (Glycoprotein 88) (Granulin precursor) (PC cell-derived growth factor) (PCDGF) (Proepithelin) (PEPI) [Cleaved into: Paragranulin; Granulin-1 (Granulin G); Granulin-2 (Granulin F); Granulin-3 (Epithelin-2) (Granulin B); Granulin-4 (Epithelin-1) (Granulin A); Granulin-5 (Granulin C); Granulin-6 (Granulin D); Granu…	5	19.918	21.4059	24.2954	18.8051	22.1429	21.3135	23.2399	23.5181	20.0223	23.9831	19.4218	22.037	TRUE	0.7094	0.723596	1.65129			20.8581	20.7193	19.2446	18.7546	18.5693	19.6292	21.5494	21.7683	21.6637	17.7968	21.3701	20.8297	TRUE	0.147793	1.20049	2.29818				TRUE
Q15714	TSC22D1	TSC22D1 KIAA1994 TGFB1I4 TSC22 hucep-2	TSC22 domain family protein 1 (Cerebral protein 2) (Regulatory protein TSC-22) (TGFB-stimulated clone 22 homolog) (Transforming growth factor beta-1-induced transcript 4 protein)	3	21.1691	21.3341	20.6093	19.0872	21.1346	20.6669	21.4987	21.2907	21.5159	21.3572	21.286	21.3897	TRUE	0.158874	0.722843	1.65043			20.7611	20.4532	18.9578	20.6728	20.4289	20.2548	20.7732	20.1337	20.82	20.583	20.8242	20.6268	TRUE	0.394137	0.372042	1.29418
Q5VWZ2	LYPLAL1	LYPLAL1	Lysophospholipase-like protein 1 (EC 3.1.2.-)	3	21.1821	21.5487	20.1012	19.2981	20.8633	20.5987	20.2667	21.5482	22.427	21.4711	20.8746	21.3175	TRUE	0.329166	0.71886	1.64588			18.1347	19.845	18.1011	19.4615	19.1515	18.9387	19.6196	19.8412	18.3809	19.3074	19.475	19.3248	TRUE	0.252047	0.386089	1.30685
Q8TBX8	PIP4K2C	PIP4K2C PIP5K2C	Phosphatidylinositol 5-phosphate 4-kinase type-2 gamma (EC 2.7.1.149) (Phosphatidylinositol 5-phosphate 4-kinase type II gamma) (PI(5)P 4-kinase type II gamma) (PIP4KII-gamma)	6	22.2024	18.6757	22.1446	22.2846	22.3668	21.5348	21.8001	22.2712	22.0425	22.1851	22.9587	22.2515	TRUE	0.386446	0.716713	1.64343			21.2622	21.0403	21.4809	22.0819	21.4396	21.461	21.5476	20.9222	21.6214	21.8128	21.1513	21.4111	TRUE	0.683212	-0.049902	0.966002
O75431	MTX2	MTX2	Metaxin-2 (Mitochondrial outer membrane import complex protein 2)	3	22.1901	22.3731	19.2726	22.473	19.2488	21.1115	21.5197	21.8594	21.8904	22.0421	21.8158	21.8255	TRUE	0.405103	0.713966	1.64031			20.5999	20.8826	20.8767	21.2559	20.9018	20.9033	20.3189	20.4007	21.022	20.9232	20.8287	20.6987	TRUE	0.134431	-0.20464	0.867755
O43676	NDUFB3	NDUFB3	NADH dehydrogenase [ubiquinone] 1 beta subcomplex subunit 3 (Complex I-B12) (CI-B12) (NADH-ubiquinone oxidoreductase B12 subunit)	3	19.179	20.1077	19.244	20.2749	20.4043	19.842	20.3589	19.5515	19.7479	20.7581	22.3591	20.5551		0.161946	0.713141	1.63937			22.1606	21.1992	21.4415	21.3226	20.9543	21.4156	21.2361	21.0539	21.0568	21.1122	21.053	21.1024	TRUE	0.141571	-0.313213	0.804847
P10636	MAPT	MAPT MAPTL MTBT1 TAU	Microtubule-associated protein tau (Neurofibrillary tangle protein) (Paired helical filament-tau) (PHF-tau)	22	28.0117	28.5928	27.3025	28.4147	27.2255	27.9095	28.8323	28.7389	29.1489	28.5942	27.7917	28.6212	TRUE	0.0833994	0.711744	1.63778			27.1612	26.5861	26.9455	26.9213	27.1726	26.9573	27.7439	27.2093	27.5741	26.7305	27.5066	27.3529	TRUE	0.0646292	0.395584	1.31548
Q9UJ14	GGT7	GGT7 GGTL3 GGTL5	Glutathione hydrolase 7 (EC 3.4.19.13) (Gamma-glutamyltransferase 7) (GGT 7) (EC 2.3.2.2) (Gamma-glutamyltransferase-like 3) (Gamma-glutamyltransferase-like 5) (Gamma-glutamyltranspeptidase 7) [Cleaved into: Glutathione hydrolase 7 heavy chain; Glutathione hydrolase 7 light chain]	3	22.358	22.1528	18.9935	18.8066	22.3607	20.9343	22.4452	22.8166	19.8752	22.3249	20.7521	21.6428	TRUE	0.439934	0.708524	1.63413			20.8189	18.9315	20.2708	21.3644	20.9158	20.4603	18.4453	20.3031	20.8213	21.0869	20.922	20.3157	TRUE	0.828198	-0.144559	0.904656
Q9H3H3	C11orf68	C11orf68 BLES03	UPF0696 protein C11orf68 (Basophilic leukemia-expressed protein Bles03) (Protein p5326)	4	21.3197	18.7545	19.3831	21.2431	21.2556	20.3912	20.8735	21.127	21.0002	21.1113	21.3666	21.0957	TRUE	0.267452	0.704519	1.6296			21.003	19.9488	20.6853	21.4683	18.4116	20.3034	20.875	20.1277	20.7122	21.12	20.612	20.6894	TRUE	0.450362	0.385987	1.30675
O00233	PSMD9	PSMD9	26S proteasome non-ATPase regulatory subunit 9 (26S proteasome regulatory subunit p27)	2	19.8655	18.8217	18.3708	18.6899	18.4841	18.8464	19.2509	18.9895	19.0046	20.9834	19.5257	19.5508		0.218705	0.704407	1.62947			19.7599	19.78	19.0975	20.0022	18.242	19.3763	19.8706	19.5699	19.7964	19.6118	19.7086	19.7115	TRUE	0.37769	0.335168	1.26152
P20700	LMNB1	LMNB1 LMN2 LMNB	Lamin-B1	4	21.4043	19.1447	19.766	20.5661	19.5081	20.0778	20.9226	20.8375	21.1787	21.6786	19.2367	20.7708	TRUE	0.196339	0.693	1.61664			18.5296	17.821	17.8376	19.0903	18.4008	18.3358	19.3509	18.1449	18.1361	16.9938	20.0163	18.5284		0.771677	0.19253	1.14277
P51665	PSMD7	PSMD7 MOV34L	26S proteasome non-ATPase regulatory subunit 7 (26S proteasome regulatory subunit RPN8) (26S proteasome regulatory subunit S12) (Mov34 protein homolog) (Proteasome subunit p40)	2	21.2269	19.6723	19.6099	21.0874	19.2655	20.1724	21.3188	21.1073	20.9771	21.3316	19.5732	20.8616	TRUE	0.0782873	0.689185	1.61237			19.0825	18.428	18.2784	19.0158	18.3449	18.6299	18.8343	17.8096	18.1374	19.8013	18.0756	18.5316		0.69732	-0.0982872	0.934141
Q8IZR5	CMTM4	CMTM4 CKLFSF4	CKLF-like MARVEL transmembrane domain-containing protein 4 (Chemokine-like factor superfamily member 4)	2	22.6492	23.2743	18.7924	23.0286	19.3308	21.415	22.7143	23.1024	22.875	23.1061	18.7227	22.1041	TRUE	0.466652	0.689048	1.61222			21.0381	18.8343	21.1129	20.8833	21.6191	20.6975	20.8435	20.8032	21.4732	20.6622	21.4368	21.0438	TRUE	0.455981	0.346243	1.27125
Q9BUT1	BDH2	BDH2 DHRS6 SDR15C1 UNQ6308/PRO20933	3-hydroxybutyrate dehydrogenase type 2 (EC 1.1.1.-) (EC 1.1.1.30) (Dehydrogenase/reductase SDR family member 6) (Oxidoreductase UCPA) (R-beta-hydroxybutyrate dehydrogenase) (Short chain dehydrogenase/reductase family 15C member 1)	4	21.2331	21.599	21.0437	19.3649	19.3236	20.5129	21.7683	22.3969	21.313	19.4738	21.0562	21.2016	TRUE	0.0737688	0.688774	1.61191			18.6822	21.3255	21.0201	20.4953	20.7748	20.4596	21.1006	19.2196	21.408	20.516	20.8482	20.6185	TRUE	0.835738	0.158876	1.11642
Q6GMV3	PTRHD1	PTRHD1 C2orf79	Putative peptidyl-tRNA hydrolase PTRHD1 (EC 3.1.1.29) (Peptidyl-tRNA hydrolase domain-containing protein 1)	3	19.0143	18.4787	19.2398	21.7884	18.4726	19.3988	18.9155	19.9879	20.2017	19.8525	21.4615	20.0838		0.452022	0.685051	1.60776			21.4177	22.023	20.7627	20.6206	17.584	20.4816	20.9674	22.0655	21.228	20.8709	21.2244	21.2712	TRUE	0.339456	0.789639	1.72864
Q92954	PRG4	PRG4 MSF SZP	Proteoglycan 4 (Lubricin) (Megakaryocyte-stimulating factor) (Superficial zone proteoglycan) [Cleaved into: Proteoglycan 4 C-terminal part]	3	22.1731	19.4376	22.1889	19.0518	21.7225	20.9148	21.9816	21.6818	19.6608	22.2788	22.364	21.5934	TRUE	0.534477	0.678629	1.60062			20.8902	20.1696	20.3698	20.7633	20.8082	20.6002	20.7632	20.6785	20.5556	21.0895	20.9227	20.8019	TRUE	0.13047	0.201681	1.15004
Q13136	PPFIA1	PPFIA1 LIP1	Liprin-alpha-1 (LAR-interacting protein 1) (LIP-1) (Protein tyrosine phosphatase receptor type f polypeptide-interacting protein alpha-1) (PTPRF-interacting protein alpha-1)	9	19.4765	20.4936	20.2256	18.1149	19.3819	19.5385	19.7501	20.723	20.5544	19.6334	20.4156	20.2153		0.0578997	0.676785	1.59857			17.0523	20.5631	18.1033	20.6075	20.6762	19.4005	19.2755	20.6392	18.5139	20.7939	20.5388	19.9523	TRUE	0.265965	0.551793	1.46591
Q13442	PDAP1	PDAP1 HASPP28	28 kDa heat- and acid-stable phosphoprotein (PDGF-associated protein) (PAP) (PDGFA-associated protein 1) (PAP1)	3	20.887	19.6197	19.6807	21.1134	19.988	20.2578	21.3843	21.071	20.8567	21.0661	20.2898	20.9336	TRUE	0.0719335	0.675811	1.59749			20.2737	19.0787	18.4331	19.6278	17.8973	19.0621	18.1322	18.1055	18.9321	18.6115	18.5082	18.4579		0.308116	-0.604185	0.657843
P29972	AQP1	AQP1 CHIP28	Aquaporin-1 (AQP-1) (Aquaporin-CHIP) (Urine water channel) (Water channel protein for red blood cells and kidney proximal tubule)	1	21.7016	21.1012	19.3899	22.2757	19.9997	20.8936	22.2264	22.3384	20.6426	23.0128	19.6129	21.5666	TRUE	0.0885294	0.673003	1.59439			19.575	21.6912	19.3305	17.6227	20.2169	19.6873	18.9234	20.2703	18.098	19.4553	18.9292	19.1352	TRUE	0.417046	-0.552032	0.682059			TRUE	TRUE
Q93045	STMN2	STMN2 SCG10 SCGN10	Stathmin-2 (Superior cervical ganglion-10 protein) (Protein SCG10)	6	22.8558	19.49	21.9842	22.9797	22.6745	21.9968	23.4125	23.0607	23.0098	20.6744	23.1847	22.6684	TRUE	0.511692	0.671593	1.59283			22.3126	21.485	22.3144	22.7649	22.952	22.3658	22.459	22.2759	22.751	22.3743	22.5878	22.4896	TRUE	0.616937	0.12384	1.08963
P49815	TSC2	TSC2 TSC4	Tuberin (Tuberous sclerosis 2 protein)	3	19.4114	19.5637	19.1577	18.6044	18.295	19.0064	19.7122	19.1891	19.5845	19.8846	20.0012	19.6743		0.145062	0.667883	1.58874			17.7925	18.1968	19.1729	19.3662	18.9191	18.6895	18.7221	18.3811	19.5025	18.9723	19.3745	18.9905	TRUE	0.232382	0.300996	1.23199
P01011	SERPINA3	SERPINA3 AACT GIG24 GIG25	Alpha-1-antichymotrypsin (ACT) (Cell growth-inhibiting gene 24/25 protein) (Serpin A3) [Cleaved into: Alpha-1-antichymotrypsin His-Pro-less]	6	22.9413	23.2389	25.4977	23.3608	23.3769	23.6831	24.4659	24.1165	24.4007	24.2921	24.4626	24.3475	TRUE	0.217818	0.664432	1.58494			21.4269	22.5971	21.6853	21.1039	22.5176	21.8662	23.1534	23.2918	22.6043	21.9995	22.8429	22.7784	TRUE	0.0165215	0.912202	1.88192	TRUE	TRUE
Q96CV9	OPTN	OPTN FIP2 GLC1E HIP7 HYPL NRP	Optineurin (E3-14.7K-interacting protein) (FIP-2) (Huntingtin yeast partner L) (Huntingtin-interacting protein 7) (HIP-7) (Huntingtin-interacting protein L) (NEMO-related protein) (Optic neuropathy-inducing protein) (Transcription factor IIIA-interacting protein) (TFIIIA-IntP)	8	22.5382	22.7321	19.1571	22.5422	22.7725	21.9484	22.4287	22.7144	22.6435	22.6658	22.6038	22.6113	TRUE	0.401934	0.662836	1.58319			20.8688	20.7628	21.0471	21.051	20.6519	20.8763	20.9369	21.4226	20.5929	21.0445	21.0532	21.01	TRUE	0.519385	0.133691	1.0971
P46976	GYG1	GYG1 GYG	Glycogenin-1 (GN-1) (GN1) (EC 2.4.1.186)	5	21.0676	21.2974	19.7118	21.4298	20.7188	20.8451	21.3322	21.4424	21.2181	21.4702	21.9898	21.4905	TRUE	0.103957	0.645431	1.56421			21.2207	21.8883	21.2523	20.0786	20.6408	21.0162	21.0099	21.9582	21.5978	20.2203	20.7412	21.1055	TRUE	0.372891	0.0893543	1.06389
P14866	HNRNPL	HNRNPL HNRPL P/OKcl.14	Heterogeneous nuclear ribonucleoprotein L (hnRNP L)	3	22.0304	22.7915	20.0854	22.2042	20.0731	21.4369	21.7428	22.1584	22.5406	22.291	21.6773	22.082	TRUE	0.337162	0.645119	1.56387			18.321	21.0648	21.3684	21.8368	20.6593	20.6501	20.6321	20.4793	18.6872	20.8626	20.8929	20.3108	TRUE	0.698774	-0.339242	0.790457
P16070	CD44	CD44 LHR MDU2 MDU3 MIC4	CD44 antigen (CDw44) (Epican) (Extracellular matrix receptor III) (ECMR-III) (GP90 lymphocyte homing/adhesion receptor) (HUTCH-I) (Heparan sulfate proteoglycan) (Hermes antigen) (Hyaluronate receptor) (Phagocytic glycoprotein 1) (PGP-1) (Phagocytic glycoprotein I) (PGP-I) (CD antigen CD44)	6	22.6517	21.3451	23.8462	22.5935	19.7169	22.0307	23.7422	22.6086	23.5957	24.4576	18.9574	22.6723	TRUE	0.262205	0.641638	1.5601			21.3929	24.4077	18.5946	17.9077	20.9557	20.6517	22.1817	24.1539	21.7141	18.0009	22.299	21.6699	TRUE	0.161442	1.0182	2.0254			TRUE	TRUE
P23469	PTPRE	PTPRE	Receptor-type tyrosine-protein phosphatase epsilon (Protein-tyrosine phosphatase epsilon) (R-PTP-epsilon) (EC 3.1.3.48)	5	19.6903	19.2698	17.9091	20.1055	19.0763	19.2102	19.6273	20.2109	19.795	20.3024	19.307	19.8485	TRUE	0.145376	0.638307	1.5565			20.1209	18.2831	19.9641	20.6408	17.7735	19.3565	18.2247	20.5194	18.9007	19.1189	20.0571	19.3642		0.993799	0.00767975	1.00534
P55107	GDF10	GDF10 BMP3B	Growth/differentiation factor 10 (GDF-10) (Bone morphogenetic protein 3B) (BMP-3B) (Bone-inducing protein) (BIP)	3	19.4066	19.8649	20.1755	19.7099	19.662	19.7638	21.0567	18.264	20.8121	21.5727	20.3041	20.4019	TRUE	0.357281	0.638145	1.55633			18.7088	17.5126	17.427	18.4783	18.7216	18.1697	19.0231	18.4122	17.3777	18.2415	19.3157	18.474		0.215286	0.304351	1.23486			TRUE
Q9UM54	MYO6	MYO6 KIAA0389	Unconventional myosin-VI (Unconventional myosin-6)	5	18.6651	19.8018	21.582	20.899	18.6664	19.9229	20.6801	20.7167	20.7063	20.9828	19.704	20.558	TRUE	0.261631	0.635112	1.55306			19.6021	20.0647	16.7083	19.2373	19.4935	19.0212	20.0033	19.7887	19.5775	19.5612	19.5656	19.6993	TRUE	0.292883	0.678072	1.6
P55010	EIF5	EIF5	Eukaryotic translation initiation factor 5 (eIF-5)	3	21.624	19.3681	22.0514	21.2809	21.6082	21.1865	21.6283	21.9029	21.7969	22.2665	21.5115	21.8212	TRUE	0.291121	0.634712	1.55263			20.8044	21.1593	21.2362	21.0397	20.8124	21.0104	18.2464	17.211	21.4071	20.483	20.9001	19.6495	TRUE	0.169458	-1.3609	0.38934
Q9UNH7	SNX6	SNX6	Sorting nexin-6 (TRAF4-associated factor 2) [Cleaved into: Sorting nexin-6, N-terminally processed]	4	21.3156	21.6224	20.5794	19.907	18.8421	20.4533	21.2859	20.3844	21.951	22.1358	19.6547	21.0824	TRUE	0.349527	0.629048	1.54654			18.2172	20.3872	20.1476	20.2892	20.1983	19.8479	19.3219	19.9908	20.176	17.7663	19.8543	19.4219	TRUE	0.509956	-0.426044	0.7443
Q92783	STAM	STAM STAM1	Signal transducing adapter molecule 1 (STAM-1)	3	21.2475	21.3699	20.7374	21.1293	19.2402	20.7449	21.2665	21.4498	21.148	21.439	21.5408	21.3688	TRUE	0.216226	0.623956	1.5411			20.7	20.1533	20.5379	21.1383	20.7766	20.6612	20.4296	20.2471	20.783	20.381	20.0347	20.3751	TRUE	0.238978	-0.286128	0.8201
Q5JRX3	PITRM1	PITRM1 KIAA1104 MP1 PREP	Presequence protease, mitochondrial (hPreP) (EC 3.4.24.-) (Pitrilysin metalloproteinase 1) (Metalloprotease 1) (hMP1)	6	21.5215	22.353	18.893	19.368	22.2966	20.8864	21.41	21.8044	20.7485	20.9385	22.6455	21.5094	TRUE	0.255021	0.622982	1.54006			20.3111	18.5807	20.0113	20.113	19.8658	19.7764	20.1343	19.9284	19.9843	20.0265	20.507	20.1161	TRUE	0.307412	0.339719	1.26551
Q9BPX5	ARPC5L	ARPC5L	Actin-related protein 2/3 complex subunit 5-like protein (Arp2/3 complex 16 kDa subunit 2) (ARC16-2)	2	21.3547	20.3774	21.6626	20.1144	21.9702	21.0958	21.5859	21.7002	21.5612	21.943	21.7762	21.7133	TRUE	0.202517	0.617447	1.53416			20.9792	19.1937	20.5124	20.6683	21.1325	20.4972	21.3582	20.801	20.3094	20.8026	21.0171	20.8576	TRUE	0.333348	0.360418	1.2838
Q9HBH5	RDH14	RDH14 PAN2 SDR7C4 UNQ529/PRO1072	Retinol dehydrogenase 14 (EC 1.1.1.300) (Alcohol dehydrogenase PAN2) (Short chain dehydrogenase/reductase family 7C member 4)	4	19.2664	21.5858	20.0231	21.3832	19.1123	20.2741	20.8899	21.4847	19.0914	21.527	21.4639	20.8914	TRUE	0.360536	0.617244	1.53394			17.878	20.2568	19.2146	20.2122	19.9298	19.4983	20.5415	20.5187	20.1958	21.0335	20.9178	20.6415	TRUE	0.046894	1.1432	2.2087
O95721	SNAP29	SNAP29	Synaptosomal-associated protein 29 (SNAP-29) (Soluble 29 kDa NSF attachment protein) (Vesicle-membrane fusion protein SNAP-29)	3	21.3883	18.3739	19.8644	20.516	21.2927	20.2871	21.1168	21.6063	20.4209	21.5275	19.8453	20.9034	TRUE	0.471673	0.616291	1.53293			20.1096	18.3617	20.2048	18.5718	20.1483	19.4792	18.6806	18.9284	18.5985	19.8502	19.989	19.2093		0.654181	-0.269893	0.829381
Q5VTU8	ATP5F1EP2	ATP5F1EP2 ATP5EP2	ATP synthase subunit epsilon-like protein, mitochondrial (ATP synthase F1 subunit epsilon pseudogene 2)	2	24.7352	25.6832	20.4581	25.508	25.4426	24.3654	24.3419	25.0239	25.1812	24.8387	25.5139	24.9799	TRUE	0.584947	0.614519	1.53105			24.3754	18.3112	24.1668	24.1138	24.1441	23.0223	23.7905	23.6078	23.9863	24.2219	23.725	23.8663	TRUE	0.492726	0.844071	1.79511
P84090	ERH	ERH	Enhancer of rudimentary homolog	2	22.5767	22.2015	20.4856	17.987	21.9236	21.0349	22.3215	22.4301	22.1839	19.4177	21.8875	21.6481	TRUE	0.198297	0.613227	1.52968			18.3339	17.8767	20.4461	22.446	21.5659	20.1337	21.0949	21.2563	18.3964	21.2632	21.6858	20.7393	TRUE	0.601091	0.605608	1.52162
P51808	DYNLT3	DYNLT3 TCTE1L TCTE1XL	Dynein light chain Tctex-type 3 (Protein 91/23) (T-complex-associated testis-expressed 1-like)	2	19.309	18.9935	18.9822	19.6106	18.7508	19.1292	18.2072	19.8595	19.5712	21.0122	20.0592	19.7419		0.247951	0.612656	1.52907			19.914	21.0611	18.298	19.6613	19.2948	19.6459	19.7863	20.4575	20.0479	19.9529	20.7583	20.2006	TRUE	0.289276	0.554736	1.4689
Q13045	FLII	FLII FLIL	Protein flightless-1 homolog	3	19.9552	18.6351	19.0287	17.999	18.717	18.867	19.4626	19.1473	19.3679	19.3728	20.0443	19.479		0.151797	0.612002	1.52838			18.3839	17.9363	19.5469	18.1399	16.7951	18.1604	18.5905	18.6675	18.9201	18.7367	18.5046	18.6839	TRUE	0.239769	0.523465	1.4374
P63313	TMSB10	TMSB10 PTMB10 THYB10	Thymosin beta-10	5	23.2027	19.2672	19.1325	23.8219	23.6524	21.8153	22.6077	23.627	23.4654	18.6175	23.808	22.4251	TRUE	0.749193	0.609798	1.52605			24.0737	22.5396	23.604	23.7341	23.9936	23.589	22.9124	22.8175	23.6667	24.0272	22.9791	23.2806	TRUE	0.391876	-0.308456	0.807506
Q9NUU7	DDX19A	DDX19A DDX19L	ATP-dependent RNA helicase DDX19A (EC 3.6.4.13) (DDX19-like protein) (DEAD box protein 19A)	4	21.0631	21.6949	19.2212	18.2424	19.7281	19.9899	20.7915	19.6984	20.7927	20.842	20.8116	20.5873	TRUE	0.494816	0.597322	1.51291			20.0043	18.5169	17.2792	19.754	19.0814	18.9272	19.2204	19.5515	19.2279	17.48	16.9882	18.4936	TRUE	0.632781	-0.43355	0.740437
Q9UBT2	UBA2	UBA2 SAE2 UBLE1B HRIHFB2115	SUMO-activating enzyme subunit 2 (EC 2.3.2.-) (Anthracycline-associated resistance ARX) (Ubiquitin-like 1-activating enzyme E1B) (Ubiquitin-like modifier-activating enzyme 2)	2	19.7633	19.3678	18.6788	20.8111	18.69	19.4622	19.4897	19.8129	19.0556	20.5914	21.3267	20.0553		0.327268	0.593061	1.50844			20.0025	17.5526	20.3611	20.2433	17.8295	19.1978	19.44	19.9019	18.8968	20.0633	19.4538	19.5511	TRUE	0.643944	0.353341	1.27752
O14827	RASGRF2	RASGRF2 GRF2	Ras-specific guanine nucleotide-releasing factor 2 (Ras-GRF2) (Ras guanine nucleotide exchange factor 2)	4	20.081	18.621	19.7533	21.5499	20.6604	20.1331	20.5432	21.0773	21.2143	19.6584	21.1358	20.7258	TRUE	0.457889	0.592683	1.50805			19.7374	18.8852	18.9087	18.7606	18.2313	18.9046	20.3564	19.473	18.6585	17.5426	20.1061	19.2273		0.563653	0.322702	1.25067
Q9UHD9	UBQLN2	UBQLN2 N4BP4 PLIC2 HRIHFB2157	Ubiquilin-2 (Chap1) (DSK2 homolog) (Protein linking IAP with cytoskeleton 2) (PLIC-2) (hPLIC-2) (Ubiquitin-like product Chap1/Dsk2)	3	22.5398	20.8536	22.4474	21.2315	21.8657	21.7876	22.0937	22.4661	22.6882	22.0864	22.5512	22.3771	TRUE	0.158527	0.589529	1.50476			20.3266	20.1296	20.8823	20.4406	21.8137	20.7186	18.2252	20.5064	18.1547	21.1704	21.2518	19.8617	TRUE	0.274515	-0.856879	0.552146
P50440	GATM	GATM AGAT	Glycine amidinotransferase, mitochondrial (EC 2.1.4.1) (L-arginine:glycine amidinotransferase) (Transamidinase)	5	19.9191	18.85	17.84	19.1845	19.0696	18.9727	18.7883	18.3213	20.013	20.771	19.9019	19.5591		0.400046	0.586443	1.50154			18.0397	19.6589	19.7435	18.3801	19.401	19.0446	19.1503	20.3175	19.6126	20.4408	20.1806	19.9404	TRUE	0.0653671	0.895716	1.86053
Q7L1I2	SV2B	SV2B KIAA0735	Synaptic vesicle glycoprotein 2B	5	23.7701	24.8228	20.4427	24.2397	24.3799	23.531	23.723	23.9735	24.6734	23.5118	24.7001	24.1164	TRUE	0.565863	0.585325	1.50038			23.1804	22.2105	22.5927	23.6896	23.0773	22.9501	22.7682	22.5983	22.8729	23.3102	22.7388	22.8577	TRUE	0.625898	-0.0924301	0.937942
P01834	IGKC	IGKC	Immunoglobulin kappa constant (Ig kappa chain C region) (Ig kappa chain C region AG) (Ig kappa chain C region CUM) (Ig kappa chain C region EU) (Ig kappa chain C region OU) (Ig kappa chain C region ROY) (Ig kappa chain C region TI)	7	23.0606	23.782	25.0771	24.0086	23.5005	23.8857	24.154	24.4819	24.7893	24.2883	24.6359	24.4699	TRUE	0.0942401	0.584137	1.49914			22.0919	23.1596	22.8002	23.9544	23.8111	23.1634	22.4416	23.1382	23.9626	23.1081	24.1338	23.3569	TRUE	0.583309	0.193434	1.14348
Q86UW8	HAPLN4	HAPLN4 BRAL2 KIAA1926	Hyaluronan and proteoglycan link protein 4 (Brain link protein 2)	9	18.557	22.8342	18.8136	21.6047	19.7089	20.3037	21.7053	21.9261	19.7576	21.7152	19.3329	20.8874	TRUE	0.457076	0.583738	1.49873			17.8766	20.9605	22.5996	21.7446	18.4934	20.3349	20.6631	18.9601	21.8486	21.5117	21.1339	20.8235	TRUE	0.635213	0.488541	1.40303
P12694	BCKDHA	BCKDHA	2-oxoisovalerate dehydrogenase subunit alpha, mitochondrial (EC 1.2.4.4) (Branched-chain alpha-keto acid dehydrogenase E1 component alpha chain) (BCKDE1A) (BCKDH E1-alpha)	5	21.4569	20.2445	19.507	21.6317	21.1903	20.8061	21.1169	21.6292	21.3711	21.6989	21.0879	21.3808	TRUE	0.261537	0.574683	1.48935			19.4078	20.5328	19.8837	19.6766	19.906	19.8814	19.5495	20.5253	20.1134	19.8966	19.8692	19.9908	TRUE	0.122676	0.109389	1.07877
O95502	NPTXR	NPTXR	Neuronal pentraxin receptor	10	23.3819	23.1602	22.7402	24.1265	22.3804	23.1578	24.0465	23.3275	23.1004	24.8013	23.3863	23.7324	TRUE	0.016351	0.574564	1.48923			21.2245	21.9046	17.4648	21.085	21.2168	20.5791	22.7802	22.0926	20.87	21.2202	22.2576	21.8441	TRUE	0.101863	1.265	2.40327
Q8N465	D2HGDH	D2HGDH D2HGD	D-2-hydroxyglutarate dehydrogenase, mitochondrial (EC 1.1.99.-)	2	18.5994	19.0377	19.6878	19.8341	19.2579	19.2834	19.4912	19.6198	19.7144	19.7249	20.7149	19.853	TRUE	0.118121	0.569658	1.48417			18.0781	18.9011	19.5213	18.2101	18.1236	18.5668	17.0924	17.4282	18.3743	18.5738	18.7393	18.0416		0.282755	-0.525238	0.694844
Q66K14	TBC1D9B	TBC1D9B KIAA0676	TBC1 domain family member 9B	8	21.1881	21.4792	20.8728	21.6877	21.3531	21.3162	21.8135	21.8217	21.9798	22.0595	21.7547	21.8858	TRUE	0.0164798	0.569641	1.48415			20.1021	20.3702	17.9378	19.2278	20.0727	19.5421	18.5506	20.2201	17.9735	20.2807	20.1187	19.4287	TRUE	0.79911	-0.113406	0.924403
Q99584	S100A13	S100A13	Protein S100-A13 (S100 calcium-binding protein A13)	5	21.9462	22.6187	20.9928	21.9285	21.6201	21.8213	22.4854	22.9679	22.1297	22.3562	22.0119	22.3902	TRUE	0.0173682	0.568962	1.48346			21.8236	22.2972	22.3096	21.2856	21.8594	21.9151	22.2652	22.7402	22.6524	21.8624	21.7816	22.2604	TRUE	0.0369474	0.345288	1.2704
P13667	PDIA4	PDIA4 ERP70 ERP72	Protein disulfide-isomerase A4 (EC 5.3.4.1) (Endoplasmic reticulum resident protein 70) (ER protein 70) (ERp70) (Endoplasmic reticulum resident protein 72) (ER protein 72) (ERp-72) (ERp72)	4	19.162	19.2777	19.1059	19.5258	19.3502	19.2843	21.3104	19.7417	19.4891	19.411	19.3028	19.851		0.240566	0.566693	1.48113			20.2289	20.7164	20.6895	20.0514	20.1154	20.3603	20.25	20.3871	20.0007	19.771	19.8491	20.0516	TRUE	0.0525764	-0.308747	0.807342
Q12846	STX4	STX4 STX4A	Syntaxin-4 (Renal carcinoma antigen NY-REN-31)	6	21.6531	22.1921	22.0209	22.3282	20.1179	21.6624	21.3087	23.3752	24.117	22.7713	19.5642	22.2273	TRUE	0.314002	0.564828	1.47921			21.0002	20.8034	20.9811	18.1998	20.8441	20.3657	20.8444	20.9346	16.2723	21.4126	21.1574	20.1243	TRUE	0.858658	-0.241449	0.845896
P67870	CSNK2B	CSNK2B CK2N G5A	Casein kinase II subunit beta (CK II beta) (Phosvitin) (Protein G5a)	2	19.3623	19.6691	19.2166	19.6042	18.4951	19.2695	20.2788	18.8883	18.5271	20.1335	21.3415	19.8339		0.440742	0.564387	1.47876			18.6144	20.3295	19.0034	20.1945	20.0242	19.6332	20.149	20.0154	20.2675	19.9675	17.6261	19.6051	TRUE	0.970002	-0.0280788	0.980725
Q9H0U4	RAB1B	RAB1B	Ras-related protein Rab-1B	8	22.7766	21.1447	19.3171	20.1277	23.9162	21.4565	20.4371	22.5483	23.7674	19.5012	23.8473	22.0203	TRUE	0.647233	0.563805	1.47816			22.524	21.7731	22.2649	21.9004	22.6936	22.2312	21.9086	22.1434	22.8733	22.7918	21.3104	22.2055	TRUE	0.954536	-0.0257034	0.982342
P28472	GABRB3	GABRB3	Gamma-aminobutyric acid receptor subunit beta-3 (GABA(A) receptor subunit beta-3)	6	21.3331	19.2676	18.5538	20.9184	19.1554	19.8457	20.2671	20.4838	20.612	20.6201	20.0634	20.4093	TRUE	0.367872	0.563615	1.47797			18.5918	18.1348	18.9132	19.0688	17.9078	18.5233	19.0257	18.8748	18.2981	19.1237	19.0851	18.8815		0.305561	0.358154	1.28179
O00186	STXBP3	STXBP3	Syntaxin-binding protein 3 (Platelet Sec1 protein) (PSP) (Protein unc-18 homolog 3) (Unc18-3) (Protein unc-18 homolog C) (Unc-18C)	4	19.4781	19.5222	19.1888	20.3821	19.0877	19.5318	20.5147	19.0552	21.3924	20.0764	19.4381	20.0954		0.313052	0.563568	1.47792			20.2128	20.4076	20.4353	20.0487	20.3555	20.292	19.9536	20.4711	19.9938	20.1538	19.956	20.1057	TRUE	0.179637	-0.18632	0.878845
P27105	STOM	STOM BND7 EPB72	Erythrocyte band 7 integral membrane protein (Protein 7.2b) (Stomatin)	8	23.7395	23.2996	24.2577	23.7886	22.7564	23.5684	24.2919	24.0145	24.8268	24.4253	23.0996	24.1316	TRUE	0.000816066	0.563269	1.47761			22.2511	23.1581	21.3371	22.4117	22.1469	22.261	22.2992	23.3314	21.8463	23.068	22.4605	22.6011	TRUE	0.0366018	0.340091	1.26584
P04083	ANXA1	ANXA1 ANX1 LPC1	Annexin A1 (Annexin I) (Annexin-1) (Calpactin II) (Calpactin-2) (Chromobindin-9) (Lipocortin I) (Phospholipase A2 inhibitory protein) (p35)	23	24.0245	24.3823	25.373	23.1882	22.6343	23.9205	27.2459	23.4738	24.9644	24.5659	22.1617	24.4824	TRUE	0.5069	0.561901	1.47621			22.4735	24.6863	22.4564	25.0812	21.8387	23.3072	23.6764	24.6389	22.6351	21.5552	23.1425	23.1296	TRUE	0.849757	-0.177592	0.884177			TRUE
Q08629	SPOCK1	SPOCK1 SPOCK TIC1 TICN1	Testican-1 (Protein SPOCK)	2	18.8963	18.618	20.6436	18.9217	18.6656	19.149	20.1323	19.6117	18.9922	19.9687	19.8286	19.7067	TRUE	0.370971	0.557685	1.47191			17.0407	17.0878	18.2389	18.122	18.7669	17.8513	18.2328	17.8406	18.3436	18.0543	18.8312	18.2605	TRUE	0.165928	0.409227	1.32797			TRUE	TRUE
Q9UBQ0	VPS29	VPS29 DC15 DC7 MDS007	Vacuolar protein sorting-associated protein 29 (hVPS29) (PEP11 homolog) (Vesicle protein sorting 29)	5	23.3772	24.306	19.9592	23.8666	23.6416	23.0301	23.6459	23.694	23.9206	23.321	23.3572	23.5877	TRUE	0.554237	0.557637	1.47186			22.4776	22.1195	22.3258	22.2078	22.294	22.2849	22.1346	22.1651	22.2849	22.2234	22.3963	22.2409	TRUE	0.603246	-0.0440762	0.969911
Q9BW30	TPPP3	TPPP3 CGI-38	Tubulin polymerization-promoting protein family member 3 (TPPP/p20)	8	22.5551	23.309	22.8715	23.3653	22.2713	22.8744	23.4198	23.4593	23.6889	23.5931	22.9982	23.4319	TRUE	0.0216764	0.55742	1.47164			21.9355	23.1914	22.2877	21.1346	21.6997	22.0498	21.9376	22.6507	22.4899	21.8868	21.3952	22.072	TRUE	0.925151	0.0222412	1.01554
P19623	SRM	SRM SPS1 SRML1	Spermidine synthase (SPDSY) (EC 2.5.1.16) (Putrescine aminopropyltransferase)	4	20.2086	20.7207	19.3423	20.9722	21.4421	20.5372	21.0886	21.1141	20.7512	21.1363	21.3756	21.0932	TRUE	0.103477	0.556004	1.47019			20.3594	20.6462	19.9108	20.1729	20.9808	20.414	20.4019	20.3679	20.2054	19.9623	20.2205	20.2316	TRUE	0.359376	-0.182437	0.881213
P63215	GNG3	GNG3 GNGT3	Guanine nucleotide-binding protein G(I)/G(S)/G(O) subunit gamma-3	3	17.7018	20.5016	19.1	19.6584	20.3727	19.4669	19.2286	17.6011	19.7394	19.4839	24.0505	20.0207		0.634045	0.553808	1.46796			22.8399	18.9805	23.1084	23.9183	22.8032	22.3301	22.481	18.39	22.5384	23.4721	22.3719	21.8507	TRUE	0.000397675	-0.479406	0.717273
P69905	HBA1;	HBA1; HBA2	Hemoglobin subunit alpha (Alpha-globin) (Hemoglobin alpha chain)	10	29.8216	29.3134	29.1072	28.8785	29.5383	29.3318	29.6919	30.095	29.6074	29.6701	30.3475	29.8824	TRUE	0.037326	0.550575	1.46467			29.0599	29.206	28.4013	27.4658	28.2454	28.4757	29.6669	29.2474	28.4497	28.3316	28.7752	28.8941	TRUE	0.0615044	0.418437	1.33648
P62987	UBA52	UBA52 UBCEP2	Ubiquitin-60S ribosomal protein L40 (CEP52) (Ubiquitin A-52 residue ribosomal protein fusion product 1) [Cleaved into: Ubiquitin; 60S ribosomal protein L40 (Large ribosomal subunit protein eL40)]	8	28.3009	27.6164	29.1291	28.1281	28.3896	28.3128	28.8117	28.8784	29.1439	28.7412	28.7182	28.8587	TRUE	0.0569219	0.545845	1.45988			27.2928	26.77	27.7867	27.5799	27.4904	27.384	28.0686	27.3423	28.0379	27.5508	27.6445	27.7288	TRUE	0.076567	0.344874	1.27004
P02671	FGA	FGA	Fibrinogen alpha chain [Cleaved into: Fibrinopeptide A; Fibrinogen alpha chain]	15	23.6536	24.8424	24.5079	24.7371	23.6768	24.2836	24.3184	24.8086	25.532	24.9339	24.5352	24.8256	TRUE	0.053379	0.542039	1.45603			22.2368	23.3169	22.5736	21.1061	23.3272	22.5121	22.8558	23.0595	23.1179	22.0122	23.6043	22.9299	TRUE	0.100357	0.417839	1.33593
P68871	HBB	HBB	Hemoglobin subunit beta (Beta-globin) (Hemoglobin beta chain) [Cleaved into: LVV-hemorphin-7; Spinorphin]	15	29.7207	29.8563	28.607	28.5516	29.5991	29.2669	29.6064	30.2006	29.3857	29.4535	30.3971	29.8087	TRUE	0.0462356	0.541744	1.45573			29.2799	29.3213	28.1918	27.0915	28.0036	28.3776	29.773	29.2834	27.9656	27.7151	28.6319	28.6738	TRUE	0.173326	0.296172	1.22788
Q92932	PTPRN2	PTPRN2 KIAA0387	Receptor-type tyrosine-protein phosphatase N2 (R-PTP-N2) (EC 3.1.3.-) (EC 3.1.3.48) (Islet cell autoantigen-related protein) (IAR) (ICAAR) (Phogrin) [Cleaved into: IA-2beta60]	4	20.4106	21.2249	19.3187	20.988	18.2712	20.0427	20.5391	21.1275	20.5929	21.5095	19.1442	20.5826	TRUE	0.0946136	0.539975	1.45395			18.7602	17.9644	19.4199	20.0882	18.5781	18.9622	17.9443	17.9238	18.4111	20.3699	19.0009	18.73		0.467231	-0.232144	0.851369
P01034	CST3	CST3	Cystatin-C (Cystatin-3) (Gamma-trace) (Neuroendocrine basic polypeptide) (Post-gamma-globulin)	2	22.9214	23.7878	22.7867	23.5578	23.1057	23.2319	23.8846	24.0685	23.4573	23.6694	23.7781	23.7716	TRUE	0.0239808	0.539693	1.45366			22.4188	21.2093	22.4859	21.8757	22.0956	22.0171	22.529	21.5636	22.7669	22.124	22.4771	22.2921	TRUE	0.00448948	0.275065	1.21005
O75525	KHDRBS3	KHDRBS3 SALP SLM2	KH domain-containing, RNA-binding, signal transduction-associated protein 3 (RNA-binding protein T-Star) (Sam68-like mammalian protein 2) (SLM-2) (Sam68-like phosphotyrosine protein)	3	19.6635	18.7018	18.5709	19.3846	18.3485	18.9339	19.2441	18.44	19.5067	20.8133	19.3591	19.4727		0.218585	0.538798	1.45276			19.3704	17.9823	20.079	19.5095	19.2644	19.2411	19.0281	17.3951	19.3479	19.7174	19.3895	18.9756	TRUE	0.229642	-0.265504	0.831908
Q86Y39	NDUFA11	NDUFA11	NADH dehydrogenase [ubiquinone] 1 alpha subcomplex subunit 11 (Complex I-B14.7) (CI-B14.7) (NADH-ubiquinone oxidoreductase subunit B14.7)	3	18.848	20.3727	18.8166	20.2093	18.4806	19.3454	20.358	20.5612	18.9835	19.0079	20.4915	19.8804		0.397814	0.534992	1.44893			19.7466	20.3385	20.3491	18.9122	19.7316	19.8156	20.4182	20.4592	20.5798	20.5849	20.5059	20.5096	TRUE	0.0648514	0.694017	1.61778
P21333	FLNA	FLNA FLN FLN1	Filamin-A (FLN-A) (Actin-binding protein 280) (ABP-280) (Alpha-filamin) (Endothelial actin-binding protein) (Filamin-1) (Non-muscle filamin)	48	24.7557	24.2383	25.0426	24.5339	23.9235	24.4988	25.3672	24.7671	25.3814	25.5292	24.1132	25.0316	TRUE	0.0177064	0.532813	1.44675			23.1975	24.7885	23.26	22.9641	23.3711	23.5162	23.6058	24.7315	23.4727	23.0093	23.6752	23.6989	TRUE	0.0967452	0.182677	1.13499
Q9UHL4	DPP7	DPP7 DPP2 QPP	Dipeptidyl peptidase 2 (EC 3.4.14.2) (Dipeptidyl aminopeptidase II) (Dipeptidyl peptidase 7) (Dipeptidyl peptidase II) (DPP II) (Quiescent cell proline dipeptidase)	4	20.5055	21.0107	21.3161	20.968	19.2791	20.6159	20.1722	21.9695	21.2542	22.5888	19.754	21.1477	TRUE	0.204907	0.531854	1.44579			18.6545	17.9014	19.0955	17.039	18.6032	18.2587	18.6821	18.3578	20.6575	19.1023	18.4527	19.0505		0.143241	0.791787	1.73122
Q765P7	MTSS2	MTSS2 MTSS1L	Protein MTSS 2 (Actin-bundling with BAIAP2 homology protein 1) (ABBA-1) (MTSS1-like protein)	7	22.5393	21.8636	21.0758	21.8683	21.3569	21.7408	22.1584	22.3576	22.3846	22.7075	21.7372	22.2691	TRUE	0.131098	0.528272	1.4422			20.5445	20.4691	21.033	21.162	22.042	21.0501	21.5509	22.0089	21.1024	20.6	20.9741	21.2473	TRUE	0.703607	0.197144	1.14643
P55327	TPD52	TPD52	Tumor protein D52 (Protein N8)	3	22.1534	19.4143	21.4629	19.1877	18.2422	20.0921	21.6767	21.6007	20.7943	19.6963	19.3275	20.6191		0.371889	0.526989	1.44092			21.0061	21.6874	20.6906	21.5434	21.9057	21.3667	21.6943	21.3807	19.5862	21.4907	21.4116	21.1127	TRUE	0.434356	-0.253945	0.8386
Q9P265	DIP2B	DIP2B KIAA1463	Disco-interacting protein 2 homolog B (DIP2 homolog B)	5	21.2106	19.2522	21.6839	20.8686	21.0169	20.8064	21.2093	21.3987	21.3557	21.3715	21.3306	21.3332	TRUE	0.286758	0.526716	1.44065			19.8516	19.7233	20.4495	19.8971	19.9464	19.9736	20.2037	20.2181	19.7013	19.9071	20.1438	20.0348	TRUE	0.792611	0.0612167	1.04335
Q92805	GOLGA1	GOLGA1	Golgin subfamily A member 1 (Golgin-97)	3	19.0614	18.6486	19.8277	20.0927	20.4009	19.6063	19.073	19.8232	19.3367	19.7485	22.6805	20.1324		0.374489	0.526138	1.44007			20.9925	21.1816	21.3259	19.2153	21.4925	20.8415	21.314	20.9017	21.1324	18.7325	18.9811	20.2123	TRUE	0.267481	-0.629223	0.646525
P62310	LSM3	LSM3 MDS017	U6 snRNA-associated Sm-like protein LSm3	2	21.2193	20.3955	19.2951	20.7796	19.2979	20.1975	20.6654	20.3184	20.9072	21.0653	20.6574	20.7227	TRUE	0.275355	0.525262	1.4392			19.9563	19.4915	20.3522	19.8507	20.1107	19.9523	19.5588	19.6285	19.0211	19.628	19.7924	19.5258	TRUE	0.155247	-0.426531	0.744049
A6NDG6	PGP	PGP	Glycerol-3-phosphate phosphatase (G3PP) (EC 3.1.3.21) (Aspartate-based ubiquitous Mg(2+)-dependent phosphatase) (AUM) (EC 3.1.3.48) (Phosphoglycolate phosphatase) (PGP)	2	19.1003	18.8177	19.2432	20.6638	21.655	19.896	19.0434	21.0697	20.8762	19.6352	21.4787	20.4206		0.438603	0.524635	1.43857			21.4813	17.0466	21.2832	17.9937	20.1096	19.5829	21.1155	19.9753	20.6567	20.5537	20.2884	20.5179	TRUE	0.281767	0.935023	1.91192
Q9NT62	ATG3	ATG3 APG3 APG3L	Ubiquitin-like-conjugating enzyme ATG3 (EC 2.3.2.-) (Autophagy-related protein 3) (APG3-like) (hApg3) (Protein PC3-96)	4	21.6487	19.0908	19.59	20.7355	21.1123	20.4354	21.372	21.1688	20.9991	21.478	19.7791	20.9594	TRUE	0.435785	0.523951	1.43789			20.0316	20.4862	20.3469	20.1411	20.3162	20.2644	18.821	20.1556	18.7673	19.9557	20.2061	19.5812	TRUE	0.0839739	-0.683228	0.62277
O76024	WFS1	WFS1	Wolframin	7	22.1327	23.09	21.0878	22.7912	21.8069	22.1817	22.2892	23.152	23.2768	22.7374	22.0603	22.7031	TRUE	0.282238	0.521423	1.43537			21.1191	21.6419	20.9755	21.8604	21.458	21.411	21.494	21.3886	21.788	21.6419	21.0719	21.4769	TRUE	0.786969	0.0658875	1.04673
Q8NE62	CHDH	CHDH	Choline dehydrogenase, mitochondrial (CDH) (CHD) (EC 1.1.99.1)	9	20.9279	22.4639	19.86	21.932	18.274	20.6915	21.0369	21.8544	21.472	21.8207	19.8806	21.2129	TRUE	0.319584	0.521373	1.43532			19.355	21.813	19.9286	20.9904	19.3584	20.2891	19.6801	21.9712	20.4687	21.5346	19.9651	20.7239	TRUE	0.00661863	0.434847	1.35177
Q9UGV2	NDRG3	NDRG3	Protein NDRG3 (N-myc downstream-regulated gene 3 protein)	3	22.5854	23.1686	18.6579	22.7515	22.8844	22.0096	22.5462	22.6726	22.3496	22.6666	22.3734	22.5217	TRUE	0.557408	0.512103	1.42613			21.8804	21.1954	21.784	21.7142	21.3952	21.5938	21.689	21.1272	21.8482	21.6604	21.6075	21.5865	TRUE	0.919003	-0.0073864	0.994893
Q8N4Q0	ZADH2	ZADH2 PTGR3	Prostaglandin reductase 3 (PRG-3) (EC 1.3.1.48) (Zinc-binding alcohol dehydrogenase domain-containing protein 2)	3	17.7896	19.45	20.1373	21.0441	20.2893	19.7421	20.8541	20.3816	19.6144	20.2556	20.1497	20.2511	TRUE	0.508995	0.509008	1.42307			17.8897	18.3794	20.9141	19.1636	18.5179	18.973	19.3552	18.5056	18.8041	17.3379	17.3914	18.2788	TRUE	0.354656	-0.694109	0.618091
O43169	CYB5B	CYB5B CYB5M OMB5	Cytochrome b5 type B (Cytochrome b5 outer mitochondrial membrane isoform)	3	20.5708	19.7703	19.842	18.9302	18.5731	19.5373	21.5567	18.8945	20.4241	19.7135	19.6358	20.0449		0.226859	0.507614	1.4217			20.2435	19.8756	19.4886	20.2107	20.5748	20.0787	20.3245	20.9149	20.1535	19.96	21.1163	20.4938	TRUE	0.140271	0.415186	1.33347
Q13884	SNTB1	SNTB1 SNT2B1	Beta-1-syntrophin (59 kDa dystrophin-associated protein A1 basic component 1) (DAPA1B) (BSYN2) (Syntrophin-2) (Tax interaction protein 43) (TIP-43)	7	22.5697	22.0858	21.5738	21.9426	19.2245	21.4793	22.264	22.4295	22.0048	22.4117	20.8085	21.9837	TRUE	0.172936	0.50444	1.41857			20.0962	21.8925	20.6623	19.4958	21.0312	20.6356	20.5785	21.6024	20.5199	19.8914	21.0354	20.7255	TRUE	0.582475	0.0899044	1.0643
P58549	FXYD7	FXYD7	FXYD domain-containing ion transport regulator 7	2	19.9616	20.1322	18.7079	20.0712	19.2038	19.6153	19.3387	18.9421	19.6718	18.8577	23.7685	20.1158		0.670192	0.500407	1.41461			22.0253	18.6992	23.3708	24.0365	22.2439	22.0751	19.2568	21.216	22.3129	17.9307	21.6353	20.4703	TRUE	0.319289	-1.60482	0.328777
Q6ZVM7	TOM1L2	TOM1L2	TOM1-like protein 2 (Target of Myb-like protein 2)	8	22.0627	22.627	22.3159	22.4302	23.0733	22.5018	22.7137	22.6729	23.0733	22.9368	23.6008	22.9995	TRUE	0.0149667	0.497694	1.41195			21.7874	20.7559	21.5051	21.3982	21.3707	21.3635	21.7078	21.3452	21.7607	21.4046	21.3308	21.5098	TRUE	0.307285	0.146363	1.10678
Q9H598	SLC32A1	SLC32A1 VGAT VIAAT	Vesicular inhibitory amino acid transporter (GABA and glycine transporter) (Solute carrier family 32 member 1) (Vesicular GABA transporter) (hVIAAT)	3	19.5512	19.1043	19.6666	19.2762	20.4138	19.6024	20.099	21.54	20.8519	19.2626	18.743	20.0993		0.504291	0.496901	1.41118			20.5409	20.6507	20.3835	20.4842	21.4456	20.701	20.4156	20.143	20.3581	17.3724	20.444	19.7466	TRUE	0.167028	-0.954381	0.516063
O75077	ADAM23	ADAM23 MDC3	Disintegrin and metalloproteinase domain-containing protein 23 (ADAM 23) (Metalloproteinase-like, disintegrin-like, and cysteine-rich protein 3) (MDC-3)	4	19.7188	21.7139	20.6579	21.618	21.522	21.0461	20.9468	21.7225	21.1306	21.7738	22.1324	21.5412	TRUE	0.0802317	0.495089	1.40941			21.0343	19.9373	21.982	21.6453	20.6764	21.0551	20.6975	20.7478	21.7665	21.4569	20.7835	21.0904	TRUE	0.872656	0.0353695	1.02482
Q13131	PRKAA1	PRKAA1 AMPK1	5'-AMP-activated protein kinase catalytic subunit alpha-1 (AMPK subunit alpha-1) (EC 2.7.11.1) (Acetyl-CoA carboxylase kinase) (ACACA kinase) (EC 2.7.11.27) (Hydroxymethylglutaryl-CoA reductase kinase) (HMGCR kinase) (EC 2.7.11.31) (Tau-protein kinase PRKAA1) (EC 2.7.11.26)	2	19.8775	20.6517	19.4386	20.9566	19.1959	20.024	20.204	20.916	20.1452	20.9451	20.3776	20.5176	TRUE	0.0753569	0.493533	1.40789			17.5706	19.7184	20.5446	19.842	19.561	19.4473	18.4109	20.2448	19.3583	19.7633	20.2376	19.603	TRUE	0.695372	0.155649	1.11392
Q9Y3Q8	TSC22D4	TSC22D4 THG1 TILZ2	TSC22 domain family protein 4 (TSC22-related-inducible leucine zipper protein 2) (Tsc-22-like protein THG-1)	1	19.4104	19.2946	19.4706	20.1525	18.5686	19.3793	19.3034	19.9018	19.5215	20.5675	20.0664	19.8721	TRUE	0.154865	0.49277	1.40714			17.9313	18.8366	20.0676	18.7359	18.3985	18.794	17.893	19.0166	17.6895	18.4527	18.5599	18.3223	TRUE	0.384891	-0.471677	0.721126
P01023	A2M	A2M CPAMD5 FWP007	Alpha-2-macroglobulin (Alpha-2-M) (C3 and PZP-like alpha-2-macroglobulin domain-containing protein 5)	18	23.9992	24.2081	24.0734	24.035	23.9159	24.0463	24.2418	24.4849	24.6034	24.4515	24.9066	24.5376	TRUE	0.0219581	0.491323	1.40573			23.7999	23.8496	22.8108	22.6806	23.3637	23.3009	24.3941	24.0283	23.603	22.8561	23.7538	23.7271	TRUE	0.023716	0.42614	1.34363
Q96AQ6	PBXIP1	PBXIP1 HPIP	Pre-B-cell leukemia transcription factor-interacting protein 1 (Hematopoietic PBX-interacting protein)	15	24.3294	24.0699	24.3243	24.3015	22.211	23.8472	24.7056	24.4609	25.0584	24.9147	22.5466	24.3372	TRUE	0.00326157	0.490029	1.40447			22.6307	23.3629	22.1555	22.1694	22.9199	22.6477	23.0335	23.5584	22.5919	22.5943	23.5042	23.0564	TRUE	0.00277454	0.408749	1.32753					TRUE
Q13151	HNRNPA0	HNRNPA0 HNRPA0	Heterogeneous nuclear ribonucleoprotein A0 (hnRNP A0)	5	20.0919	19.0828	19.1005	19.8296	19.1331	19.4476	18.9221	21.2022	20.2575	19.6786	19.6206	19.9362		0.431926	0.48864	1.40312			19.6813	18.4384	20.7567	20.0106	19.7225	19.7219	19.3959	19.3432	19.9931	20.4283	19.4071	19.7135	TRUE	0.978802	-0.00837784	0.99421
Q14643	ITPR1	ITPR1 INSP3R1	Inositol 1,4,5-trisphosphate receptor type 1 (IP3 receptor isoform 1) (IP3R 1) (InsP3R1) (Type 1 inositol 1,4,5-trisphosphate receptor) (Type 1 InsP3 receptor)	8	18.7801	20.9401	20.5601	19.945	20.8773	20.2205	20.5841	21.7233	21.3545	20.8382	19.0411	20.7083	TRUE	0.469763	0.48774	1.40225			20.7754	18.3537	21.0397	21.3408	20.307	20.3633	20.097	19.7169	20.5763	21.1438	20.1196	20.3307	TRUE	0.932383	-0.0325729	0.977675
P84103	SRSF3	SRSF3 SFRS3 SRP20	Serine/arginine-rich splicing factor 3 (Pre-mRNA-splicing factor SRP20) (Splicing factor, arginine/serine-rich 3)	3	23.1881	22.0763	23.0365	22.4403	22.3444	22.6171	22.9696	23.3457	22.7129	23.1908	23.3047	23.1047	TRUE	0.203337	0.487618	1.40213			18.6008	21.7606	22.8816	18.9082	21.874	20.805	21.711	21.8805	22.409	21.6737	21.8899	21.9128	TRUE	0.216583	1.10778	2.15513
P11532	DMD	DMD	Dystrophin	5	21.4917	22.1203	21.0958	21.665	18.6525	21.0051	20.9032	22.0593	21.6069	21.9523	20.9379	21.4919	TRUE	0.373534	0.48683	1.40136			20.531	21.3461	21.0568	20.3885	21.1884	20.9022	20.277	21.1421	20.4735	20.7634	20.9495	20.7211	TRUE	0.307416	-0.181077	0.882044
P49407	ARRB1	ARRB1 ARR1	Beta-arrestin-1 (Arrestin beta-1) (Non-visual arrestin-2)	9	22.9988	22.3475	22.5839	22.5181	23.0956	22.7088	23.2696	23.0965	23.4331	22.7866	23.3897	23.1951	TRUE	0.0194882	0.486316	1.40086			22.4082	22.5868	22.0959	21.8557	22.1106	22.2114	22.7971	22.7445	22.0914	22.172	22.3666	22.4343	TRUE	0.0309927	0.222871	1.16705
Q08380	LGALS3BP	LGALS3BP M2BP	Galectin-3-binding protein (Basement membrane autoantigen p105) (Lectin galactoside-binding soluble 3-binding protein) (Mac-2-binding protein) (MAC2BP) (Mac-2 BP) (Tumor-associated antigen 90K)	2	20.0395	20.2076	20.5671	20.023	20.4738	20.2622	20.9357	20.4721	20.7498	20.6364	20.9464	20.7481	TRUE	0.018989	0.48587	1.40043			19.8881	19.8338	19.9074	18.8924	19.561	19.6166	20.242	18.3955	19.97	19.1357	19.4727	19.4432	TRUE	0.6221	-0.173401	0.88675
Q9UM19	HPCAL4	HPCAL4	Hippocalcin-like protein 4 (HLP4)	6	22.1864	22.0835	21.7772	20.6485	21.4934	21.6378	21.4593	22.2249	22.5432	22.5284	21.8539	22.1219	TRUE	0.319088	0.484159	1.39877			20.5994	20.6424	19.8999	20.5445	21.3679	20.6108	20.5117	20.7091	20.3012	20.9181	18.1499	20.118	TRUE	0.513119	-0.492833	0.710628
Q29940	HLA-B	HLA-B HLAB	HLA class I histocompatibility antigen, B alpha chain (Human leukocyte antigen B) (HLA-B)	5	21.7523	21.1758	21.0232	21.3658	20.2565	21.1147	22.128	21.7196	22.1979	22.1691	19.7652	21.596	TRUE	0.158446	0.48126	1.39596			17.5273	20.6318	19.6803	17.7353	20.2304	19.161	18.87	19.9656	19.2387	19.1547	19.9289	19.4316	TRUE	0.585865	0.270544	1.20626
Q96SZ5	ADO	ADO C10orf22	2-aminoethanethiol dioxygenase (EC 1.13.11.19) (Cysteamine dioxygenase)	3	18.4939	20.3086	19.3325	19.4549	19.447	19.4073	18.4691	19.1346	20.9011	20.8088	20.1231	19.8873		0.390486	0.479983	1.39473			17.5817	19.468	20.1835	20.3622	19.7535	19.4698	19.9079	19.6574	20.0204	20.3703	19.9991	19.991	TRUE	0.317626	0.521268	1.43522
P48681	NES	NES Nbla00170	Nestin	6	20.6213	18.2492	19.799	20.4755	19.9274	19.8145	20.9354	20.513	21.0992	18.6203	20.3028	20.2941	TRUE	0.521553	0.479665	1.39442			18.8908	19.2945	19.2149	19.5753	18.9202	19.1792	18.7413	17.7111	18.9509	18.5332	17.8358	18.3545		0.0379757	-0.824693	0.564603
P02042	HBD	HBD	Hemoglobin subunit delta (Delta-globin) (Hemoglobin delta chain)	11	22.8258	23.4844	22.5294	22.5126	23.3538	22.9412	22.9871	23.8021	23.3855	22.813	24.1164	23.4208	TRUE	0.0255275	0.479607	1.39436			22.232	22.7457	21.645	20.8157	21.4477	21.7772	22.4243	22.3059	21.0321	21.6705	21.4349	21.7735	TRUE	0.989335	-0.0036766	0.997455
Q9NZ45	CISD1	CISD1 C10orf70 ZCD1 MDS029	CDGSH iron-sulfur domain-containing protein 1 (MitoNEET)	4	23.9255	23.9709	19.4593	23.859	24.6286	23.1687	23.5199	23.4812	23.5614	23.6305	24.0478	23.6482	TRUE	0.625193	0.479512	1.39427			23.7465	23.2616	23.6243	23.4561	22.9366	23.405	23.1199	22.9427	23.4695	23.5545	23.2195	23.2612	TRUE	0.416456	-0.143819	0.90512
O95298	NDUFC2	NDUFC2 HLC1	NADH dehydrogenase [ubiquinone] 1 subunit C2 (Complex I-B14.5b) (CI-B14.5b) (Human lung cancer oncogene 1 protein) (HLC-1) (NADH-ubiquinone oxidoreductase subunit B14.5b)	4	23.6177	23.7357	23.4918	23.9151	19.1131	22.7747	22.3885	23.4214	23.0139	23.2843	24.1568	23.253	TRUE	0.699244	0.478314	1.39311			22.9967	22.5258	22.7665	22.9373	22.6339	22.772	22.3699	22.3313	23.0758	22.7454	22.2245	22.5494	TRUE	0.225159	-0.222652	0.856989
Q15796	SMAD2	SMAD2 MADH2 MADR2	Mothers against decapentaplegic homolog 2 (MAD homolog 2) (Mothers against DPP homolog 2) (JV18-1) (Mad-related protein 2) (hMAD-2) (SMAD family member 2) (SMAD 2) (Smad2) (hSMAD2)	2	18.8724	18.3008	19.4108	18.8229	18.6924	18.8199	18.983	18.5965	18.9633	20.2307	19.7165	19.298	TRUE	0.221768	0.478149	1.39296			17.6841	18.2408	19.5897	18.1909	17.9984	18.3408	17.7481	17.9998	17.6163	18.5273	17.7515	17.9286	TRUE	0.366374	-0.412194	0.75148
P60953	CDC42	CDC42	Cell division control protein 42 homolog (EC 3.6.5.2) (G25K GTP-binding protein)	6	24.8402	24.257	24.7614	20.874	24.8159	23.9097	24.6004	23.6082	24.602	23.8232	25.3025	24.3873	TRUE	0.49962	0.477555	1.39238			23.5327	23.8362	23.945	23.7622	23.6034	23.7359	24.4153	23.8262	24.037	24.2794	24.2485	24.1613	TRUE	0.0648458	0.425359	1.34291
P07437	TUBB	TUBB TUBB5 OK/SW-cl.56	Tubulin beta chain (Tubulin beta-5 chain)	29	27.581	24.2151	27.5935	26.8439	27.39	26.7247	27.1997	27.066	27.0875	27.4654	27.1879	27.2013	TRUE	0.488434	0.476585	1.39145			25.717	26.0491	25.8401	26.4396	26.6264	26.1344	26.239	26.3322	26.1302	26.5588	26.2202	26.2961	TRUE	0.358097	0.161641	1.11856
Q8NC44	RETREG2	RETREG2 C2orf17 FAM134A MAG2	Reticulophagy regulator 2	2	19.6735	20.3029	18.4328	19.8986	20.5236	19.7663	20.5916	20.6738	19.1621	20.7487	20.0321	20.2417	TRUE	0.140906	0.475366	1.39027			19.0249	18.9374	18.4022	20.2235	19.129	19.1434	19.2775	18.9181	19.3093	18.6734	19.1439	19.0644	TRUE	0.854454	-0.07896	0.94674
P55268	LAMB2	LAMB2 LAMS	Laminin subunit beta-2 (Laminin B1s chain) (Laminin-11 subunit beta) (Laminin-14 subunit beta) (Laminin-15 subunit beta) (Laminin-3 subunit beta) (Laminin-4 subunit beta) (Laminin-7 subunit beta) (Laminin-9 subunit beta) (S-laminin subunit beta) (S-LAM beta)	20	23.7802	23.4206	23.1129	23.504	23.5219	23.4679	23.6888	23.9168	24.2623	24.389	23.4538	23.9421	TRUE	0.129474	0.474236	1.38918			22.7463	23.295	22.9435	22.8618	22.1247	22.7943	22.8108	23.343	22.411	22.4876	22.4275	22.696	TRUE	0.55767	-0.0982952	0.934136
Q9H269	VPS16	VPS16	Vacuolar protein sorting-associated protein 16 homolog (hVPS16)	7	21.0513	21.692	21.2967	21.9421	21.1693	21.4303	22.3204	22.185	21.1141	22.4055	21.474	21.8998	TRUE	0.114934	0.469518	1.38465			20.2495	20.8751	20.4354	20.7062	20.2426	20.5018	20.5301	20.6643	21.2612	20.7247	20.6437	20.7648	TRUE	0.209593	0.263029	1.2
Q3LXA3	TKFC	TKFC DAK	Triokinase/FMN cyclase (Bifunctional ATP-dependent dihydroxyacetone kinase/FAD-AMP lyase (cyclizing)) [Includes: ATP-dependent dihydroxyacetone kinase (DHA kinase) (EC 2.7.1.28) (EC 2.7.1.29) (Glycerone kinase) (Triokinase) (Triose kinase); FAD-AMP lyase (cyclizing) (EC 4.6.1.15) (FAD-AMP lyase (cyclic FMN forming)) (FMN cyclase)]	3	19.5407	19.4809	18.8511	19.0608	19.4991	19.2865	20.1659	20.4905	19.6091	18.9808	19.5268	19.7546	TRUE	0.0915197	0.468095	1.38328			18.9888	19.7606	19.1623	18.6791	18.6684	19.0518	18.884	19.4526	19.0677	19.4803	19.0912	19.1952	TRUE	0.521159	0.143329	1.10445
Q15599	SLC9A3R2	SLC9A3R2 NHERF2	Na(+)/H(+) exchange regulatory cofactor NHE-RF2 (NHERF-2) (NHE3 kinase A regulatory protein E3KARP) (SRY-interacting protein 1) (SIP-1) (Sodium-hydrogen exchanger regulatory factor 2) (Solute carrier family 9 isoform A3 regulatory factor 2) (Tyrosine kinase activator protein 1) (TKA-1)	4	21.7619	21.7509	21.7974	21.8381	21.3457	21.6988	22.3768	22.0895	22.1233	22.419	21.8231	22.1663	TRUE	0.00143858	0.467498	1.38271			20.4716	17.7189	20.6747	20.9373	20.732	20.1069	19.9944	20.2998	20.7201	20.9744	20.9476	20.5873	TRUE	0.422243	0.480369	1.3951
P56134	ATP5MF	ATP5MF ATP5J2 ATP5JL	ATP synthase subunit f, mitochondrial (ATP synthase membrane subunit f)	3	23.2493	22.2135	22.7526	22.0574	22.7555	22.6057	22.6402	22.7944	22.5972	23.4718	23.8495	23.0706	TRUE	0.28544	0.464981	1.3803			21.9452	22.272	22.3188	21.9955	22.412	22.1887	22.2459	22.217	22.4253	22.5809	22.0537	22.3045	TRUE	0.507805	0.115852	1.08361
P68402	PAFAH1B2	PAFAH1B2 PAFAHB	Platelet-activating factor acetylhydrolase IB subunit beta (EC 3.1.1.47) (PAF acetylhydrolase 30 kDa subunit) (PAF-AH 30 kDa subunit) (PAF-AH subunit beta) (PAFAH subunit beta)	4	22.1382	20.1712	21.7182	21.1841	18.9036	20.8231	18.7248	21.9004	22.0336	21.4752	22.299	21.2866	TRUE	0.701265	0.46353	1.37891			19.7036	21.2114	21.9854	20.9518	21.2299	21.0164	21.7874	22.1549	21.8707	21.7563	21.8818	21.8902	TRUE	0.0688478	0.87382	1.83251
Q92542	NCSTN	NCSTN KIAA0253 UNQ1874/PRO4317	Nicastrin	3	21.2126	21.0111	21.9247	20.8973	21.365	21.2822	21.8398	21.6039	21.4462	21.6587	22.177	21.7451	TRUE	0.124637	0.462969	1.37838			19.9285	19.8552	20.0706	19.6596	19.989	19.9006	21.1152	20.4065	20.9172	20.5892	20.4315	20.6919	TRUE	0.00408752	0.791328	1.73067	TRUE	TRUE		TRUE
Q96DE0	NUDT16	NUDT16	U8 snoRNA-decapping enzyme (EC 3.6.1.62) (IDP phosphatase) (IDPase) (EC 3.6.1.64) (Inosine diphosphate phosphatase) (Nucleoside diphosphate-linked moiety X motif 16) (Nudix motif 16) (Nudix hydrolase 16) (U8 snoRNA-binding protein H29K) (m7GpppN-mRNA hydrolase)	4	20.9691	21.3939	20.2081	20.8597	19.0334	20.4928	19.4541	21.4332	21.161	21.2851	21.4421	20.9551	TRUE	0.508305	0.46226	1.3777			19.1141	20.184	19.7291	20.0096	19.9123	19.7898	19.9311	19.9123	20.5107	20.3396	19.6881	20.0764	TRUE	0.289035	0.286535	1.21971
Q9UNM6	PSMD13	PSMD13	26S proteasome non-ATPase regulatory subunit 13 (26S proteasome regulatory subunit RPN9) (26S proteasome regulatory subunit S11) (26S proteasome regulatory subunit p40.5)	6	21.4628	22.6579	21.8823	19.8842	21.7126	21.52	21.9146	22.3008	22.0431	21.9641	21.6813	21.9808	TRUE	0.339828	0.46083	1.37633			20.6981	20.8049	21.2495	21.0933	20.5115	20.8715	20.9022	21.3662	20.49	21.3321	21.4179	21.1017	TRUE	0.454323	0.230213	1.17301
Q01968	OCRL	OCRL OCRL1	Inositol polyphosphate 5-phosphatase OCRL (EC 3.1.3.36) (EC 3.1.3.56) (Inositol polyphosphate 5-phosphatase OCRL-1) (OCRL-1) (Lowe oculocerebrorenal syndrome protein) (Phosphatidylinositol 3,4,5-triphosphate 5-phosphatase) (EC 3.1.3.86)	3	20.849	18.7174	20.4712	21.6749	19.0812	20.1587	20.7574	18.82	21.2734	21.4468	20.7926	20.618	TRUE	0.270796	0.459295	1.37487			19.2377	17.8294	18.4861	20.3466	17.929	18.7658	18.8629	17.8991	18.4741	17.5221	18.9	18.3316		0.53317	-0.434116	0.740147
Q9Y490	TLN1	TLN1 KIAA1027 TLN	Talin-1	40	24.4214	24.3741	24.1493	24.3412	23.9695	24.2511	24.5872	24.7903	25.0676	25.2315	23.8669	24.7087	TRUE	0.0840575	0.457611	1.37327			23.384	23.9091	23.5405	23.3316	23.0917	23.4514	23.5565	23.9815	23.5231	23.4638	23.5788	23.6207	TRUE	0.119066	0.169366	1.12456
P60842	EIF4A1	EIF4A1 DDX2A EIF4A	Eukaryotic initiation factor 4A-I (eIF-4A-I) (eIF4A-I) (EC 3.6.4.13) (ATP-dependent RNA helicase eIF4A-1)	14	21.4074	21.8103	24.231	21.7602	18.8368	21.6091	22.617	21.9389	22.5519	21.8335	21.3907	22.0664	TRUE	0.548877	0.457278	1.37295			20.5875	21.8579	18.7143	20.7177	20.8527	20.546	18.6525	21.439	18.706	19.737	21.0907	19.925	TRUE	0.184676	-0.621007	0.650217
O15126	SCAMP1	SCAMP1 SCAMP	Secretory carrier-associated membrane protein 1 (Secretory carrier membrane protein 1)	5	22.3535	21.9054	21.9033	22.3187	21.0469	21.9055	22.3899	22.693	22.4865	22.5318	21.7094	22.3621	TRUE	0.0324945	0.45659	1.37229			21.6039	21.1105	21.0983	21.0507	21.5631	21.2853	21.1835	21.2394	21.5441	20.8134	21.3867	21.2334	TRUE	0.750989	-0.0518944	0.964669
P06307	CCK	CCK	Cholecystokinin (CCK) [Cleaved into: Cholecystokinin-58 (CCK58); Cholecystokinin-58 desnonopeptide ((1-49)-CCK58); Cholecystokinin-39 (CCK39); Cholecystokinin-33 (CCK33); Cholecystokinin-25 (CCK25); Cholecystokinin-18 (CCK18); Cholecystokinin-12 (CCK12); Cholecystokinin-8 (CCK8); Cholecystokinin-7 (CCK7); Cholecystokinin-5 (CCK5)]	2	19.3697	20.3573	19.6575	18.6028	21.978	19.9931	18.9655	22.6538	19.5079	18.8802	22.2355	20.4486		0.394367	0.455527	1.37128			18.6833	20.8143	18.5046	21.7315	18.2005	19.5868	18.4233	20.8467	21.3989	18.299	21.2042	20.0345	TRUE	0.725565	0.447624	1.36379
P46778	RPL21	RPL21	60S ribosomal protein L21 (Large ribosomal subunit protein eL21)	2	19.8288	19.8557	19.3172	20.0114	18.8798	19.5786	19.1806	19.7695	20.8641	20.4895	19.8653	20.0338		0.303956	0.455196	1.37097			18.043	20.0335	18.8979	18.1835	18.7345	18.7785	18.4146	19.1682	19.4512	19.6479	20.0925	19.3549	TRUE	0.24146	0.57639	1.49111
O14880	MGST3	MGST3	Microsomal glutathione S-transferase 3 (Microsomal GST-3) (Glutathione peroxidase MGST3) (EC 1.11.1.-) (LTC4 synthase MGST3) (EC 4.4.1.20) (Microsomal glutathione S-transferase III) (Microsomal GST-III)	3	22.7016	19.4148	19.1888	20.3055	22.0318	20.7285	22.3488	22.598	18.964	19.5885	22.4054	21.181	TRUE	0.555899	0.452449	1.36836			19.9912	18.874	20.6899	20.9513	20.779	20.2571	21.018	21.8351	21.9853	21.1728	21.1463	21.4315	TRUE	0.0743431	1.1744	2.257
O75093	SLIT1	SLIT1 KIAA0813 MEGF4 SLIL1	Slit homolog 1 protein (Slit-1) (Multiple epidermal growth factor-like domains protein 4) (Multiple EGF-like domains protein 4)	3	20.4944	20.7424	18.703	19.8977	19.8643	19.9404	20.6182	20.0585	20.6235	21.0112	19.652	20.3927	TRUE	0.391129	0.452292	1.36821			18.4519	19.1659	18.7412	19.4806	17.9793	18.7638	19.168	18.6045	18.3109	17.5427	16.7265	18.0705		0.193111	-0.693269	0.618451			TRUE	TRUE
Q8N3E9	PLCD3	PLCD3 KIAA1964	1-phosphatidylinositol 4,5-bisphosphate phosphodiesterase delta-3 (EC 3.1.4.11) (Phosphoinositide phospholipase C-delta-3) (Phospholipase C-delta-3) (PLC-delta-3)	10	21.7636	22.1246	21.4387	21.6842	21.6419	21.7306	21.4181	22.504	22.7247	22.4137	21.8368	22.1795	TRUE	0.174252	0.448877	1.36498			20.9267	22.3361	21.4396	21.4327	20.9084	21.4087	21.2617	22.3535	21.7592	20.7502	21.1132	21.4476	TRUE	0.847209	0.0388561	1.0273
Q86YS7	C2CD5	C2CD5 CDP138 KIAA0528	C2 domain-containing protein 5 (C2 domain-containing phosphoprotein of 138 kDa)	4	19.3103	20.2634	20.178	20.6335	18.3282	19.7427	20.49	20.6707	19.5888	20.2572	19.939	20.1892		0.354657	0.446441	1.36267			19.4483	19.5999	20.4211	20.0036	19.7604	19.8467	19.7608	19.3023	19.3381	20.3185	19.7917	19.7023	TRUE	0.608606	-0.144399	0.904756
P20039	NA	NA	NA	5	18.1956	19.6339	19.4886	19.0097	20.3762	19.3408	18.26	20.2702	19.971	18.697	21.7378	19.7872		0.189329	0.446365	1.3626			19.2111	17.9414	19.2751	18.6299	18.5147	18.7144	21.9379	18.4554	19.9906	21.4419	18.3207	20.0293	TRUE	0.0984859	1.31488	2.48781			TRUE
Q7L9L4	MOB1B	MOB1B MOB4A MOBKL1A	MOB kinase activator 1B (Mob1 homolog 1A) (Mob1A) (Mob1B) (Mps one binder kinase activator-like 1A)	3	20.258	20.0163	19.655	20.5763	21.0153	20.3042	20.3685	20.6489	20.7602	20.6032	21.3707	20.7503	TRUE	0.0847831	0.446122	1.36237			19.4569	19.6112	18.8142	18.5666	19.2418	19.1381	19.4596	19.4335	19.1936	19.164	19.6368	19.3775	TRUE	0.166648	0.239349	1.18046
P04179	SOD2	SOD2	Superoxide dismutase [Mn], mitochondrial (EC 1.15.1.1)	9	25.0267	24.8222	24.9385	24.7766	25.0056	24.9139	25.1276	25.0293	25.9165	25.368	25.3561	25.3595	TRUE	0.0464664	0.445608	1.36189			24.2078	24.5081	24.6487	24.1438	24.2898	24.3596	24.7818	24.8636	24.6381	24.4336	24.4613	24.6357	TRUE	0.0466496	0.27606	1.21088
P15121	AKR1B1	AKR1B1 ALDR1 ALR2	Aldo-keto reductase family 1 member B1 (EC 1.1.1.300) (EC 1.1.1.372) (EC 1.1.1.54) (Aldehyde reductase) (Aldose reductase) (AR) (EC 1.1.1.21)	12	24.7484	24.9906	24.1437	24.8262	24.6087	24.6635	24.9836	25.113	24.8866	24.9371	25.6201	25.1081	TRUE	0.0719497	0.444559	1.3609			23.9974	24.3105	23.9058	23.9847	23.9168	24.023	24.4158	24.0799	24.4114	23.7339	23.9063	24.1094	TRUE	0.617031	0.086404	1.06172
P02656	APOC3	APOC3	Apolipoprotein C-III (Apo-CIII) (ApoC-III) (Apolipoprotein C3)	2	25.7253	25.9012	25.7775	25.5162	25.2245	25.6289	25.6438	25.5052	26.6071	26.1788	26.4234	26.0717	TRUE	0.208604	0.442725	1.35917			24.5445	24.494	24.7833	25.5959	24.7868	24.8409	24.9637	24.2254	24.5752	24.7144	24.3839	24.5725	TRUE	0.267645	-0.268401	0.830239
Q9Y2Z0	SUGT1	SUGT1	Protein SGT1 homolog (Protein 40-6-3) (Sgt1) (Suppressor of G2 allele of SKP1 homolog)	6	22.6751	23.7062	20.4198	23.4242	22.9901	22.6431	22.7329	23.262	23.2332	22.9274	23.2636	23.0838	TRUE	0.510617	0.440714	1.35728			21.8435	21.7431	21.4518	21.7021	22.1667	21.7814	21.593	21.3488	21.8989	20.9955	21.1438	21.396	TRUE	0.193811	-0.385393	0.76557
Q9NZQ3	NCKIPSD	NCKIPSD AF3P21 SPIN90	NCK-interacting protein with SH3 domain (54 kDa VacA-interacting protein) (54 kDa vimentin-interacting protein) (VIP54) (90 kDa SH3 protein interacting with Nck) (AF3p21) (Dia-interacting protein 1) (DIP-1) (Diaphanous protein-interacting protein) (SH3 adapter protein SPIN90) (WASP-interacting SH3-domain protein) (WISH) (Wiskott-Aldrich syndrome protein-interacting protein)	11	21.5929	19.2758	21.1636	20.8412	22.3641	21.0475	21.3681	21.4097	21.2111	20.9838	22.4676	21.4881	TRUE	0.361668	0.44055	1.35712			20.9681	20.3413	20.7023	21.1335	20.6311	20.7552	20.5844	20.899	20.7489	21.487	20.8995	20.9238	TRUE	0.35308	0.16852	1.1239
Q96HC4	PDLIM5	PDLIM5 ENH L9	PDZ and LIM domain protein 5 (Enigma homolog) (Enigma-like PDZ and LIM domains protein)	5	21.5204	21.5027	21.5158	21.6412	19.0531	21.0466	21.8653	21.833	21.5907	21.8588	20.2735	21.4843	TRUE	0.0957248	0.437635	1.35438			19.868	20.4813	19.8625	18.4153	20.0607	19.7375	19.8581	19.9378	19.8331	17.7145	19.9255	19.4538	TRUE	0.116339	-0.283728	0.821466
P41091	EIF2S3	EIF2S3 EIF2G	Eukaryotic translation initiation factor 2 subunit 3 (Eukaryotic translation initiation factor 2 subunit gamma X) (eIF-2-gamma X) (eIF-2gX)	7	22.1986	22.463	22.331	22.6657	22.5274	22.4371	22.9566	22.9927	22.7281	22.9304	22.7629	22.8742	TRUE	0.010315	0.437048	1.35383			21.6992	21.8729	21.4879	21.3327	21.3951	21.5575	21.4324	21.4207	21.5793	21.1602	21.0768	21.3339	TRUE	0.0694338	-0.22368	0.856378
Q9UNF0	PACSIN2	PACSIN2	Protein kinase C and casein kinase substrate in neurons protein 2 (Syndapin-2) (Syndapin-II) (SdpII)	9	23.1951	22.8004	22.4148	22.65	23.0134	22.8147	23.0086	23.2212	23.5299	23.2531	23.2442	23.2514	TRUE	0.111301	0.436693	1.3535			22.0636	21.6437	21.6737	21.0489	21.7285	21.6317	22.2928	22.9392	21.5224	21.2753	21.7791	21.9618	TRUE	0.259262	0.330074	1.25708
Q8TD22	SFXN5	SFXN5	Sideroflexin-5	5	22.5871	22.1793	22.2391	22.6735	22.3662	22.409	22.8632	23.0006	22.7243	23.1244	22.514	22.8453	TRUE	0.0186507	0.436245	1.35308			21.5676	21.0911	21.5156	21.6813	21.8709	21.5453	21.5286	21.4286	21.8084	22.1879	21.8746	21.7656	TRUE	0.100899	0.220311	1.16498
P09429	HMGB1	HMGB1 HMG1	High mobility group protein B1 (High mobility group protein 1) (HMG-1)	3	22.393	22.9188	19.6039	22.8066	22.5324	22.0509	23.9182	19.2233	23.3465	23.3235	22.6103	22.4844	TRUE	0.738471	0.43343	1.35044			22.2005	21.8455	22.2914	21.5209	21.6179	21.8952	22.4753	22.6235	22.6025	22.2829	22.4111	22.4791	TRUE	0.00800289	0.583827	1.49882
Q9P2B2	PTGFRN	PTGFRN CD9P1 EWIF FPRP KIAA1436	Prostaglandin F2 receptor negative regulator (CD9 partner 1) (CD9P-1) (Glu-Trp-Ile EWI motif-containing protein F) (EWI-F) (Prostaglandin F2-alpha receptor regulatory protein) (Prostaglandin F2-alpha receptor-associated protein) (CD antigen CD315)	2	19.3374	19.2626	19.505	19.6081	18.8503	19.3127	20.2	20.3804	18.4558	18.9025	20.787	19.7451		0.487461	0.432444	1.34952			18.545	19.1182	18.3776	19.7337	19.3144	19.0178	19.4467	19.1764	19.8919	17.557	19.6237	19.1391	TRUE	0.856013	0.121364	1.08776
O15079	SNPH	SNPH KIAA0374	Syntaphilin	8	23.5702	24.3162	19.512	23.9915	23.7239	23.0228	23.3905	23.5457	23.1045	23.6483	23.5721	23.4522	TRUE	0.61921	0.429451	1.34672			22.978	22.1706	22.4197	22.5516	22.1106	22.4461	22.8023	21.8705	22.1135	22.1906	21.8279	22.161	TRUE	0.000714132	-0.285143	0.82066
Q14257	RCN2	RCN2 ERC55	Reticulocalbin-2 (Calcium-binding protein ERC-55) (E6-binding protein) (E6BP)	7	22.2971	20.6404	21.436	20.9685	21.421	21.3526	22.2544	22.0652	20.9381	21.9137	21.7276	21.7798	TRUE	0.28107	0.427216	1.34464			20.4604	21.1032	20.2851	21.1486	20.8648	20.7724	20.9429	20.6934	20.6673	20.6472	20.3138	20.6529	TRUE	0.626337	-0.11951	0.920501
Q9H0Q0	FAM49A	FAM49A	Protein FAM49A	7	21.7559	19.2995	21.2718	21.4099	21.0055	20.9485	21.0436	21.874	21.1039	21.1929	21.6615	21.3752	TRUE	0.502861	0.426661	1.34412			20.5032	20.6136	20.2523	20.3173	20.5741	20.4521	20.0618	20.1712	19.8355	20.3624	20.1774	20.1217	TRUE	0.0247778	-0.330437	0.795295
Q14008	CKAP5	CKAP5 KIAA0097	Cytoskeleton-associated protein 5 (Colonic and hepatic tumor overexpressed gene protein) (Ch-TOG)	12	22.7913	22.3813	20.2151	22.7096	22.4356	22.1066	22.6777	22.6057	22.7321	22.3995	22.2495	22.5329	TRUE	0.46634	0.426337	1.34382			21.9554	21.9549	21.8454	21.8162	21.8254	21.8794	21.5799	21.802	21.6106	21.7038	21.6976	21.6788	TRUE	0.0144244	-0.200673	0.870145
P08294	SOD3	SOD3	Extracellular superoxide dismutase [Cu-Zn] (EC-SOD) (EC 1.15.1.1)	3	22.4588	21.7129	21.2003	20.9897	21.1017	21.4927	22.9278	19.3004	23.0285	21.6136	22.7216	21.9184	TRUE	0.60435	0.425677	1.3432			21.0187	19.8596	20.2252	20.4921	20.4569	20.4105	22.4822	21.1552	21.4865	21.7371	21.9874	21.7697	TRUE	1.94258e-05	1.35918	2.56539	TRUE	TRUE
Q5VIR6	VPS53	VPS53 PP13624	Vacuolar protein sorting-associated protein 53 homolog	3	20.5652	20.6633	18.0357	19.5839	20.9124	19.9521	20.0743	20.5494	19.442	20.4488	21.3729	20.3775	TRUE	0.27683	0.425389	1.34293			19.6313	19.3616	18.1774	18.1844	19.5031	18.9715	18.8154	18.1301	17.2573	19.3941	19.0825	18.5359	TRUE	0.369546	-0.435662	0.739355
P0DPI2	GATD3A	GATD3A C21orf33	Glutamine amidotransferase-like class 1 domain-containing protein 3A, mitochondrial	9	25.7098	23.938	24.8533	25.2652	25.3384	25.0209	25.5239	25.3313	25.3395	25.5507	25.4798	25.445	TRUE	0.186006	0.424107	1.34174			23.831	23.6318	23.556	23.8692	23.6618	23.71	23.7049	23.7405	23.7844	24.1155	23.7959	23.8282	TRUE	0.150166	0.118262	1.08543
Q99523	SORT1	SORT1	Sortilin (100 kDa NT receptor) (Glycoprotein 95) (Gp95) (Neurotensin receptor 3) (NT3) (NTR3)	3	19.5776	20.7409	18.5344	19.5518	18.9527	19.4715	20.061	19.2856	19.8182	20.1977	20.1105	19.8946		0.439158	0.423148	1.34085			19.8478	19.8896	19.3947	19.2483	18.6346	19.403	18.1112	19.2798	19.5372	19.7744	19.3971	19.2199	TRUE	0.70658	-0.183089	0.880815
Q15814	TBCC	TBCC	Tubulin-specific chaperone C (Tubulin-folding cofactor C) (CFC)	5	21.2189	21.673	18.7445	21.3956	21.5145	20.9093	21.2812	21.4532	21.15	21.3874	21.3896	21.3323	TRUE	0.443528	0.422974	1.34069			20.3744	19.7256	17.7715	17.8491	20.8531	19.3147	19.8286	19.7212	18.5022	20.2362	20.1679	19.6912	TRUE	0.538808	0.376495	1.29818
P43007	SLC1A4	SLC1A4 ASCT1 SATT	Neutral amino acid transporter A (Alanine/serine/cysteine/threonine transporter 1) (ASCT-1) (SATT) (Solute carrier family 1 member 4)	4	22.3559	21.7762	22.0829	21.3587	22.6641	22.0475	22.2527	22.6524	22.0627	22.3644	23.0107	22.4686	TRUE	0.136293	0.421032	1.33889			21.1245	21.7123	21.251	21.0994	22.1152	21.4605	22.1977	22.1788	21.9516	22.242	22.3439	22.1828	TRUE	0.0143958	0.722324	1.64984	TRUE	TRUE
O14525	ASTN1	ASTN1 ASTN KIAA0289	Astrotactin-1	3	18.9628	18.0654	20.1948	17.9512	19.0656	18.848	18.8932	18.8713	18.9415	19.3331	20.2953	19.2669	TRUE	0.439302	0.418951	1.33696			19.0088	18.1173	18.7081	18.7848	18.9676	18.7173	18.3978	17.931	18.223	18.5603	18.0244	18.2273		0.0239623	-0.490028	0.712011
P02675	FGB	FGB	Fibrinogen beta chain [Cleaved into: Fibrinopeptide B; Fibrinogen beta chain]	10	23.1652	24.2496	24.6487	24.2673	22.9578	23.8577	23.6524	24.1784	25.0205	24.29	24.2305	24.2744	TRUE	0.154931	0.416636	1.33481			22.7934	23.8877	22.1096	21.4789	22.6203	22.578	23.0633	23.4035	22.391	22.3643	23.1052	22.8655	TRUE	0.26635	0.287501	1.22052
P60033	CD81	CD81 TAPA1 TSPAN28	CD81 antigen (26 kDa cell surface protein TAPA-1) (Target of the antiproliferative antibody 1) (Tetraspanin-28) (Tspan-28) (CD antigen CD81)	3	21.2937	21.0226	20.8568	21.7484	20.4548	21.0752	21.5437	21.4901	21.6112	22.1718	20.6395	21.4913	TRUE	0.0139388	0.416025	1.33425			19.8687	21.4104	20.2293	19.814	20.294	20.3233	20.7606	21.1335	20.311	20.5138	20.573	20.6584	TRUE	0.186384	0.3351	1.26146
P07108	DBI	DBI	Acyl-CoA-binding protein (ACBP) (Diazepam-binding inhibitor) (DBI) (Endozepine) (EP)	9	23.8464	24.0703	23.6298	24.0304	24.3742	23.9902	24.8998	24.2998	24.4324	24.0559	24.3343	24.4045	TRUE	0.130276	0.414227	1.33258			24.8041	25.002	24.0607	22.9324	24.2566	24.2111	24.8271	24.7304	24.3243	23.3789	24.0565	24.2634	TRUE	0.72008	0.0522831	1.0369
Q99471	PFDN5	PFDN5 MM1 PFD5	Prefoldin subunit 5 (Myc modulator 1) (c-Myc-binding protein Mm-1)	3	19.9031	17.9893	18.505	20.226	19.8916	19.303	20.7152	20.3646	18.6782	19.252	19.5661	19.7152		0.510802	0.412186	1.3307			18.4327	19.4244	18.5271	18.6637	20.136	19.0368	18.2572	18.8769	19.8319	20.1417	19.7994	19.3814	TRUE	0.469892	0.34465	1.26984
Q53H12	AGK	AGK MULK	Acylglycerol kinase, mitochondrial (hAGK) (EC 2.7.1.107) (EC 2.7.1.138) (EC 2.7.1.94) (Multiple substrate lipid kinase) (HsMuLK) (MuLK) (Multi-substrate lipid kinase)	4	19.0512	20.6091	20.9744	21.4806	19.1721	20.2575	20.8929	20.8201	20.5768	20.4247	20.6329	20.6695	TRUE	0.493584	0.412003	1.33053			20.7556	20.5836	20.7763	20.85	20.2807	20.6492	20.4073	20.5336	20.7614	20.5821	20.791	20.6151	TRUE	0.831062	-0.0341648	0.976597
Q14CZ8	HEPACAM	HEPACAM	Hepatocyte cell adhesion molecule (Protein hepaCAM)	11	25.5178	25.7429	24.3378	25.8774	23.1554	24.9263	25.9854	25.5705	25.1955	26.3564	23.5761	25.3368	TRUE	0.0681489	0.41053	1.32917			23.5405	24.1677	23.6551	23.3373	24.5072	23.8416	23.4467	24.0092	24.3253	23.5215	24.4631	23.9531	TRUE	0.501298	0.111562	1.0804
Q7Z7B0	FILIP1	FILIP1 KIAA1275	Filamin-A-interacting protein 1 (FILIP)	2	20.4423	19.0568	19.2241	19.0666	19.6296	19.4839	18.8397	19.4245	20.6598	19.1783	21.3621	19.8929		0.525746	0.409008	1.32777			18.7419	17.6384	18.3995	19.5625	20.3239	18.9332	20.1011	19.7373	18.1567	19.9926	19.6357	19.5247	TRUE	0.311461	0.591453	1.50676
Q17R89	ARHGAP44	ARHGAP44 KIAA0672 RICH2	Rho GTPase-activating protein 44 (NPC-A-10) (Rho-type GTPase-activating protein RICH2) (RhoGAP interacting with CIP4 homologs protein 2) (RICH-2)	3	19.2331	21.9122	19.0807	21.1713	21.7592	20.6313	20.6389	20.8673	21.1449	20.9104	21.6125	21.0348	TRUE	0.521274	0.403516	1.32273			19.7803	19.5324	18.1274	19.9715	19.998	19.4819	18.2727	19.5643	18.0587	20.232	19.5875	19.143	TRUE	0.337811	-0.338875	0.790658
O95372	LYPLA2	LYPLA2 APT2	Acyl-protein thioesterase 2 (APT-2) (EC 3.1.2.-) (Lysophospholipase II) (LPL-II) (LysoPLA II)	2	20.2054	18.7036	20.2491	20.4922	18.9071	19.7115	19.8389	19.6703	21.2647	20.275	19.5256	20.1149		0.240527	0.403412	1.32263			20.3243	20.3544	20.5309	18.8196	19.9503	19.9959	20.1219	20.2294	20.3126	17.8802	20.0662	19.722	TRUE	0.196346	-0.273848	0.827111
Q92734	TFG	TFG	Protein TFG (TRK-fused gene protein)	2	21.1259	19.0184	21.1752	18.8793	22.8533	20.6104	21.6146	19.9842	21.5892	22.3613	19.5179	21.0135	TRUE	0.730407	0.403037	1.32229			18.2583	18.8261	21.2975	18.3792	17.8272	18.9177	19.4999	20.9115	17.7972	21.0416	21.0955	20.0691	TRUE	0.39518	1.15147	2.22141
P14415	ATP1B2	ATP1B2	Sodium/potassium-transporting ATPase subunit beta-2 (Adhesion molecule in glia) (AMOG) (Sodium/potassium-dependent ATPase subunit beta-2)	6	25.4534	25.675	24.842	25.8461	26.2856	25.6204	25.3855	25.8786	26.2703	25.9821	26.5879	26.0209	TRUE	0.203919	0.400451	1.31992			24.5871	24.6923	24.9879	25.3884	24.9481	24.9208	24.5074	24.5792	25.14	24.8904	24.6388	24.7512	TRUE	0.198023	-0.169625	0.889073
P09110	ACAA1	ACAA1 ACAA PTHIO	3-ketoacyl-CoA thiolase, peroxisomal (EC 2.3.1.16) (Acetyl-CoA acyltransferase) (Beta-ketothiolase) (Peroxisomal 3-oxoacyl-CoA thiolase)	4	20.4954	19.6686	20.7081	19.7576	20.8164	20.2892	20.4606	20.1168	20.7524	21.0205	21.0965	20.6894	TRUE	0.159686	0.40015	1.31965			17.3846	18.8714	19.7848	19.2705	19.4973	18.9617	19.8156	19.5523	20.314	20.0957	19.583	19.8721	TRUE	0.0850826	0.910382	1.87954
O43865	AHCYL1	AHCYL1 DCAL IRBIT XPVKONA	S-adenosylhomocysteine hydrolase-like protein 1 (DC-expressed AHCY-like molecule) (IP(3)Rs binding protein released with IP(3)) (IRBIT) (Putative adenosylhomocysteinase 2) (S-adenosyl-L-homocysteine hydrolase 2) (AdoHcyase 2)	13	25.6309	25.9612	25.3094	26.0134	26.0414	25.7912	25.764	26.2749	26.485	26.2828	26.1378	26.1889	TRUE	0.115909	0.397662	1.31737			24.5729	25.1197	24.9111	24.5843	24.4806	24.7337	25.22	25.0401	25.0427	24.7597	24.6025	24.933	TRUE	0.172916	0.199293	1.14814
P02794	FTH1	FTH1 FTH FTHL6 OK/SW-cl.84 PIG15	Ferritin heavy chain (Ferritin H subunit) (EC 1.16.3.1) (Cell proliferation-inducing gene 15 protein) [Cleaved into: Ferritin heavy chain, N-terminally processed]	11	27.6611	27.1181	26.8768	27.6727	27.3359	27.3329	28.1002	27.2723	28.1755	27.341	27.7626	27.7303	TRUE	0.208259	0.397391	1.31712			26.8905	26.6607	27.1413	26.732	26.3909	26.7631	26.8851	26.6503	27.6055	26.4321	26.4449	26.8036	TRUE	0.757548	0.0405022	1.02847
O75347	TBCA	TBCA	Tubulin-specific chaperone A (TCP1-chaperonin cofactor A) (Tubulin-folding cofactor A) (CFA)	5	23.8445	23.0151	22.7681	23.6082	23.8173	23.4106	23.927	23.9679	23.3081	23.5106	24.3204	23.8068	TRUE	0.0988746	0.396157	1.316			23.3239	23.0465	23.0643	22.8079	23.0435	23.0572	23.5866	22.993	23.3086	22.5407	22.7894	23.0437	TRUE	0.912146	-0.0135616	0.990644
P01876	IGHA1	IGHA1	Immunoglobulin heavy constant alpha 1 (Ig alpha-1 chain C region) (Ig alpha-1 chain C region BUR) (Ig alpha-1 chain C region TRO)	12	23.9718	25.124	25.2932	23.8978	23.1774	24.2929	24.7863	25.4707	25.6487	24.0726	23.4659	24.6888	TRUE	0.0224189	0.395982	1.31584			22.7475	23.7316	22.1708	24.3519	24.1327	23.4269	22.3513	23.682	22.3999	21.9775	24.3844	22.959	TRUE	0.394458	-0.467881	0.723026
P53618	COPB1	COPB1 COPB MSTP026	Coatomer subunit beta (Beta-coat protein) (Beta-COP)	3	18.57	21.0609	21.9661	21.0769	19.0117	20.3371	21.1064	19.0886	21.2807	21.1348	21.0504	20.7322	TRUE	0.663308	0.395042	1.31498			20.6092	20.3667	21.2788	20.28	19.9854	20.504	20.3578	20.3302	20.3547	20.2202	20.5996	20.3725	TRUE	0.621619	-0.131517	0.912871
P04080	CSTB	CSTB CST6 STFB	Cystatin-B (CPI-B) (Liver thiol proteinase inhibitor) (Stefin-B)	5	24.1049	24.1022	23.9924	24.0158	23.6537	23.9738	25.3257	24.4306	24.1108	23.776	24.1946	24.3675	TRUE	0.181381	0.393719	1.31378			23.2492	23.7509	22.9052	23.1987	23.0832	23.2374	23.8389	23.4409	23.1102	22.6419	23.3309	23.2726	TRUE	0.873047	0.0351299	1.02465
P00915	CA1	CA1	Carbonic anhydrase 1 (EC 4.2.1.1) (Carbonate dehydratase I) (Carbonic anhydrase B) (CAB) (Carbonic anhydrase I) (CA-I)	6	21.8537	22.3469	20.8571	21.1047	22.1894	21.6703	21.9757	22.2678	21.8005	21.3384	22.9313	22.0627	TRUE	0.112043	0.392389	1.31256			22.1764	21.5563	20.9657	20.1707	20.9237	21.1586	22.2895	21.2963	21.0263	20.8304	20.482	21.1849	TRUE	0.895623	0.0263454	1.01843
P36969	GPX4	GPX4	Phospholipid hydroperoxide glutathione peroxidase (PHGPx) (EC 1.11.1.12) (Glutathione peroxidase 4) (GPx-4) (GSHPx-4)	5	22.0728	22.0898	19.0503	22.1308	22.5909	21.5869	22.3257	21.7945	21.6123	21.8109	22.3524	21.9792	TRUE	0.516944	0.392227	1.31242			21.9694	22.0063	21.465	21.7694	21.2623	21.6945	21.8451	21.6508	21.4302	21.3371	21.7781	21.6082	TRUE	0.633079	-0.0862511	0.941967
Q9NRQ2	PLSCR4	PLSCR4 GIG43	Phospholipid scramblase 4 (PL scramblase 4) (Ca(2+)-dependent phospholipid scramblase 4) (Cell growth-inhibiting gene 43 protein) (TRA1)	2	19.7366	18.8899	20.1734	18.8706	18.5763	19.2493	18.8624	19.7394	18.8688	20.8732	19.863	19.6414		0.570879	0.39203	1.31224			18.6074	20.6122	18.7752	17.6875	18.0669	18.7498	18.9282	19.403	19.108	17.5765	19.1606	18.8353	TRUE	0.832015	0.0854191	1.061
Q8IWQ3	BRSK2	BRSK2 C11orf7 PEN11B SADA STK29 HUSSY-12	Serine/threonine-protein kinase BRSK2 (EC 2.7.11.1) (Brain-selective kinase 2) (EC 2.7.11.26) (Brain-specific serine/threonine-protein kinase 2) (BR serine/threonine-protein kinase 2) (Serine/threonine-protein kinase 29) (Serine/threonine-protein kinase SAD-A)	5	18.8978	20.5965	19.2053	20.0094	19.4124	19.6243	20.3999	19.8468	19.1015	21.5212	19.2051	20.0149		0.451515	0.390634	1.31097			19.9515	16.9578	20.4127	20.9654	20.2431	19.7061	18.1643	19.813	20.1842	20.4229	19.7133	19.6595	TRUE	0.954897	-0.0465439	0.968253
P02751	FN1	FN1 FN	Fibronectin (FN) (Cold-insoluble globulin) (CIG) [Cleaved into: Anastellin; Ugl-Y1; Ugl-Y2; Ugl-Y3]	11	23.2003	22.8599	23.1831	22.9461	22.595	22.9569	23.2427	23.0246	23.6108	23.4806	23.3663	23.345	TRUE	0.0407434	0.388129	1.3087			21.8929	22.1311	21.417	21.9102	21.8991	21.85	22.0479	21.9267	21.7012	21.9524	21.9097	21.9076	TRUE	0.517738	0.0575413	1.04069
P69892	HBG2	HBG2	Hemoglobin subunit gamma-2 (Gamma-2-globin) (Hb F Ggamma) (Hemoglobin gamma-2 chain) (Hemoglobin gamma-G chain)	3	21.3836	21.0987	19.0532	21.0788	21.0471	20.7323	21.3286	21.3228	22.9717	18.5525	21.4174	21.1186	TRUE	0.726424	0.386319	1.30705			17.9607	17.6698	18.6143	18.9068	18.42	18.3143	18.1132	17.065	18.7761	19.869	18.9758	18.5598		0.397971	0.245514	1.18552
O75663	TIPRL	TIPRL	TIP41-like protein (Putative MAPK-activating protein PM10) (Type 2A-interacting protein) (TIP)	3	19.9161	19.5444	19.0146	19.8874	20.0216	19.6768	19.8485	20.2595	20.378	20.0015	19.8197	20.0614	TRUE	0.25623	0.3846	1.3055			18.8058	20.2783	20.0212	20.0957	18.0213	19.4445	19.8422	19.8411	19.8709	20.3332	20.0226	19.982	TRUE	0.290662	0.537521	1.45148
O14964	HGS	HGS HRS	Hepatocyte growth factor-regulated tyrosine kinase substrate (Hrs) (Protein pp110)	6	22.5669	22.2868	21.69	22.3401	20.7798	21.9327	22.4019	22.336	22.4784	22.1941	22.1758	22.3172	TRUE	0.278307	0.384504	1.30541			20.7162	20.9713	18.9531	21.2875	20.9275	20.5711	20.958	21.1712	21.3547	21.2711	20.6568	21.0824	TRUE	0.348005	0.511239	1.42527
O14745	SLC9A3R1	SLC9A3R1 NHERF NHERF1	Na(+)/H(+) exchange regulatory cofactor NHE-RF1 (NHERF-1) (Ezrin-radixin-moesin-binding phosphoprotein 50) (EBP50) (Regulatory cofactor of Na(+)/H(+) exchanger) (Sodium-hydrogen exchanger regulatory factor 1) (Solute carrier family 9 isoform A3 regulatory factor 1)	10	24.5073	25.3616	23.9627	25.1721	23.8081	24.5624	25.1143	25.2905	25.0421	25.3802	23.9027	24.946	TRUE	0.137151	0.383614	1.30461			23.9209	24.2502	23.8691	23.9593	24.4731	24.0945	23.7746	23.5753	24.2167	23.8181	24.2453	23.926	TRUE	0.358007	-0.168544	0.88974
Q13228	SELENBP1	SELENBP1 SBP	Methanethiol oxidase (MTO) (EC 1.8.3.4) (56 kDa selenium-binding protein) (SBP56) (SP56) (Selenium-binding protein 1)	19	24.7987	24.3257	24.2925	24.234	24.7893	24.4881	25.0919	24.6425	24.7817	24.7213	25.1198	24.8714	TRUE	0.000893054	0.383389	1.3044			24.4313	24.9536	24.2225	23.7513	24.3651	24.3448	24.7301	24.9685	24.6412	23.7781	24.1338	24.4503	TRUE	0.409639	0.105566	1.07592
Q9BRA2	TXNDC17	TXNDC17 TXNL5	Thioredoxin domain-containing protein 17 (14 kDa thioredoxin-related protein) (TRP14) (Protein 42-9-9) (Thioredoxin-like protein 5)	4	22.19	20.4015	19.5185	20.2061	21.6685	20.7969	21.4596	21.4357	19.8335	20.9093	22.2623	21.1801	TRUE	0.27238	0.38315	1.30419			20.8062	21.8693	20.3434	20.1876	20.6844	20.7782	21.4091	21.5024	21.124	20.7448	21.5294	21.2619	TRUE	0.0920324	0.483767	1.39839
Q9GZT4	SRR	SRR	Serine racemase (EC 5.1.1.18) (D-serine ammonia-lyase) (D-serine dehydratase) (EC 4.3.1.18) (L-serine ammonia-lyase) (L-serine dehydratase) (EC 4.3.1.17)	3	21.1393	19.2171	19.4171	20.6459	20.1818	20.1202	20.8446	20.5409	20.5741	20.7942	19.7588	20.5025	TRUE	0.352715	0.382308	1.30343			19.0397	17.4405	18.4358	17.7386	18.3497	18.2009	18.7097	18.5562	18.0414	18.5565	19.1422	18.6012		0.274706	0.400337	1.31982
P02790	HPX	HPX	Hemopexin (Beta-1B-glycoprotein)	4	18.9976	19.6827	18.9263	20.0815	17.8163	19.1009	19.2333	19.856	18.4303	20.316	19.5774	19.4826		0.362234	0.38169	1.30287			19.8464	19.0761	19.0854	18.4457	19.4813	19.187	20.5453	19.3048	19.3711	19.0051	21.1814	19.8815	TRUE	0.0592675	0.694556	1.61839
P23610	F8A1;	F8A1; F8A2; F8A3	40-kDa huntingtin-associated protein (HAP40) (CpG island protein) (Factor VIII intron 22 protein)	2	19.6963	19.7487	19.1608	19.176	20.2715	19.6107	19.6335	20.1857	20.2197	19.4397	20.474	19.9905	TRUE	0.113126	0.379866	1.30122			18.9249	18.8386	19.3298	19.036	19.2525	19.0763	18.2313	16.7163	18.5222	16.8374	18.9342	17.8483	TRUE	0.034376	-1.22807	0.426888	TRUE
Q7L576	CYFIP1	CYFIP1 KIAA0068	Cytoplasmic FMR1-interacting protein 1 (Specifically Rac1-associated protein 1) (Sra-1) (p140sra-1)	17	22.6093	22.6385	22.8022	22.961	22.3138	22.665	22.9147	23.2473	23.0388	23.4242	22.594	23.0438	TRUE	0.00538126	0.378838	1.30029			21.6426	22.2694	21.6073	21.4663	21.9607	21.7893	21.99	22.3063	21.4237	21.807	21.7982	21.865	TRUE	0.549514	0.0757858	1.05393
Q92882	OSTF1	OSTF1	Osteoclast-stimulating factor 1	3	20.9928	21.3819	20.7784	21.4281	20.9558	21.1074	21.0118	21.5652	21.7605	21.8416	21.2469	21.4852	TRUE	0.083108	0.377794	1.29935			19.8375	20.0947	20.3488	20.047	17.2157	19.5087	20.2109	20.4617	20.0659	20.0837	20.1415	20.1927	TRUE	0.298856	0.683996	1.60658
P07305	H1-0	H1-0 H1F0 H1FV	Histone H1.0 (Histone H1') (Histone H1(0)) [Cleaved into: Histone H1.0, N-terminally processed]	5	23.9728	24.5041	24.2658	24.5971	24.0978	24.2875	23.552	24.4218	25.6585	25.0928	24.591	24.6632	TRUE	0.290565	0.375711	1.29748			23.3957	24.0214	23.6689	23.2536	17.9386	22.4557	23.5532	23.3359	24.2785	23.1723	22.933	23.4546	TRUE	0.383064	0.998938	1.99853
P33176	KIF5B	KIF5B KNS KNS1	Kinesin-1 heavy chain (Conventional kinesin heavy chain) (Ubiquitous kinesin heavy chain) (UKHC)	10	21.3946	21.3365	20.8135	21.9041	19.673	21.0243	22.067	21.1482	21.4315	21.4366	20.914	21.3994	TRUE	0.293167	0.375105	1.29693			18.8129	20.3047	17.5165	20.2821	20.1767	19.4186	18.1897	19.5002	20.0798	19.8924	19.9707	19.5266	TRUE	0.87065	0.107975	1.07771
P42765	ACAA2	ACAA2	3-ketoacyl-CoA thiolase, mitochondrial (EC 2.3.1.16) (Acetyl-CoA acetyltransferase) (EC 2.3.1.9) (Acetyl-CoA acyltransferase) (Acyl-CoA hydrolase, mitochondrial) (EC 3.1.2.-) (EC 3.1.2.1) (EC 3.1.2.2) (Beta-ketothiolase) (Mitochondrial 3-oxoacyl-CoA thiolase) (T1)	12	23.6527	23.8147	23.0857	23.8395	23.6699	23.6125	23.9511	24.051	24.1581	24.0182	23.7509	23.9859	TRUE	0.104481	0.373352	1.29536			22.5663	23.2117	22.7357	22.5292	23.0208	22.8127	22.7837	22.9576	23.473	22.6422	22.918	22.9549	TRUE	0.450048	0.142131	1.10353
Q01130	SRSF2	SRSF2 SFRS2	Serine/arginine-rich splicing factor 2 (Protein PR264) (Splicing component, 35 kDa) (Splicing factor SC35) (SC-35) (Splicing factor, arginine/serine-rich 2)	2	22.5286	19.9744	18.4786	22.9105	18.7172	20.5219	18.559	23.0744	19.7907	22.8921	20.1596	20.8951		0.770028	0.373284	1.2953			21.4971	19.2089	18.7598	22.2352	21.5298	20.6462	18.9365	17.3765	22.0201	21.7177	18.5887	19.7279	TRUE	0.459621	-0.918283	0.529138
Q7Z460	CLASP1	CLASP1 KIAA0622 MAST1	CLIP-associating protein 1 (Cytoplasmic linker-associated protein 1) (Multiple asters homolog 1) (Protein Orbit homolog 1) (hOrbit1)	5	20.5402	19.6449	19.8242	19.5072	20.3261	19.9685	20.0243	20.2643	19.1757	21.0267	21.2158	20.3414	TRUE	0.421637	0.372863	1.29492			18.4198	17.9868	18.739	18.657	20.0479	18.7701	18.2693	19.1607	19.6206	19.4105	19.5705	19.2063		0.242013	0.436223	1.35306
P41594	GRM5	GRM5 GPRC1E MGLUR5	Metabotropic glutamate receptor 5 (mGluR5)	4	21.2946	22.6449	19.5016	19.4316	19.1911	20.4127	20.4119	21.4649	21.2082	20.8214	20.0208	20.7854	TRUE	0.563175	0.372691	1.29477			19.0677	20.1607	20.7623	20.853	18.9973	19.9682	20.4983	17.5652	18.2201	20.7859	20.7009	19.5541	TRUE	0.679131	-0.414106	0.750484
P40925	MDH1	MDH1 MDHA	Malate dehydrogenase, cytoplasmic (EC 1.1.1.37) (Cytosolic malate dehydrogenase) (Diiodophenylpyruvate reductase) (EC 1.1.1.96)	15	26.1957	26.3042	25.2722	25.9242	27.3152	26.2023	26.3674	26.5204	26.0629	26.1025	27.8142	26.5735	TRUE	0.037476	0.37119	1.29342			27.0794	26.565	26.8455	26.3675	26.3664	26.6448	26.9535	26.437	27.0676	26.3533	26.1587	26.594	TRUE	0.534944	-0.0507488	0.965435
P0DOX5	NA	NA	Immunoglobulin gamma-1 heavy chain (Immunoglobulin gamma-1 heavy chain NIE)	12	24.0483	25.5404	27.1768	25.4164	25.6585	25.5681	25.7694	25.8723	26.2691	25.7861	25.999	25.9392	TRUE	0.422722	0.371103	1.29334			23.1823	24.2675	23.9262	24.1097	23.6658	23.8303	24.0188	24.5465	24.7326	24.8816	25.4564	24.7272	TRUE	0.0217854	0.896845	1.86199	TRUE	TRUE
Q9Y276	BCS1L	BCS1L BCS1	Mitochondrial chaperone BCS1 (h-BCS1) (BCS1-like protein)	3	18.5926	20.9436	19.4374	21.1067	20.8941	20.1948	21.1538	19.32	21.318	20.2898	20.7349	20.5633	TRUE	0.668421	0.368427	1.29094			18.455	17.767	19.9247	18.3474	19.9085	18.8805	18.5744	19.6438	17.1994	19.2011	16.7351	18.2708		0.57408	-0.609753	0.655309
P11310	ACADM	ACADM	Medium-chain specific acyl-CoA dehydrogenase, mitochondrial (MCAD) (EC 1.3.8.7)	7	21.452	22.0556	21.128	22.0804	20.8998	21.5232	21.6309	21.9795	22.19	22.2484	21.402	21.8902	TRUE	0.135262	0.366997	1.28967			20.6868	21.2196	21.334	21.2122	21.0008	21.0907	21.799	21.4512	21.4195	21.1962	21.3625	21.4457	TRUE	0.150339	0.355005	1.27899
P98160	HSPG2	HSPG2	Basement membrane-specific heparan sulfate proteoglycan core protein (HSPG) (Perlecan) (PLC) [Cleaved into: Endorepellin; LG3 peptide]	22	23.9366	23.051	22.2369	23.0904	23.8718	23.2374	23.612	23.4108	23.4499	24.0852	23.457	23.603	TRUE	0.332092	0.36562	1.28844			22.5911	22.2562	22.5827	22.6707	21.2656	22.2733	22.3712	22.439	22.1964	22.1607	22.0499	22.2434	TRUE	0.905045	-0.0298153	0.979546
O60443	GSDME	GSDME DFNA5 ICERE1	Gasdermin-E (Inversely correlated with estrogen receptor expression 1) (ICERE-1) (Non-syndromic hearing impairment protein 5) [Cleaved into: Gasdermin-E, N-terminal (GSDME-NT); Gasdermin-E, C-terminal (GSDME-CT)]	3	19.4251	20.3555	19.5615	19.8551	18.3626	19.512	21.8325	19.4346	18.9759	19.7466	19.3963	19.8772		0.580578	0.365229	1.28809			18.2339	19.9625	19.5786	19.1443	19.3727	19.2584	19.1847	19.3056	18.2509	18.2418	19.1941	18.8354	TRUE	0.339659	-0.422992	0.745876
Q8IWT6	LRRC8A	LRRC8A KIAA1437 LRRC8 SWELL1 UNQ221/PRO247	Volume-regulated anion channel subunit LRRC8A (Leucine-rich repeat-containing protein 8A) (Swelling protein 1)	4	19.7037	20.1878	19.6289	18.0113	19.1429	19.3349	19.9032	19.7543	20.2291	20.2544	18.3584	19.6999	TRUE	0.527237	0.364948	1.28784			18.2357	18.6701	18.4777	18.6358	18.384	18.4806	18.6266	18.1411	19.644	17.8364	18.9518	18.64	TRUE	0.682918	0.159342	1.11678
Q9UFN0	NIPSNAP3A	NIPSNAP3A NIPSNAP4 HSPC299	Protein NipSnap homolog 3A (NipSnap3A) (Protein NipSnap homolog 4) (NipSnap4) (Target for Salmonella secreted protein C) (TassC)	5	22.9693	20.1745	22.5683	21.8765	22.4061	21.9989	22.6395	22.6118	22.0631	22.1101	22.3901	22.3629	TRUE	0.532687	0.363987	1.28698			20.8157	21.8668	21.4028	20.585	21.5355	21.2412	21.4895	22.1448	21.6404	21.3262	21.8641	21.693	TRUE	0.0129892	0.451833	1.36778
Q96GR2	ACSBG1	ACSBG1 BGM KIAA0631 LPD	Long-chain-fatty-acid--CoA ligase ACSBG1 (EC 6.2.1.3) (Acyl-CoA synthetase bubblegum family member 1) (hBG1) (hsBG) (hsBGM) (Lipidosin)	4	20.3785	20.6126	19.5861	20.0018	18.8902	19.8938	20.5347	20.7347	20.5794	21.0031	18.4357	20.2575	TRUE	0.264551	0.36368	1.2867			19.105	17.9605	19.5929	17.9384	19.0737	18.7341	18.4643	20.3534	18.6844	19.1126	19.8193	19.2868	TRUE	0.414057	0.552679	1.46681
O43491	EPB41L2	EPB41L2	Band 4.1-like protein 2 (Generally expressed protein 4.1) (4.1G)	24	25.3186	25.221	24.741	25.2771	24.5536	25.0223	25.8009	25.3211	25.4741	25.9797	24.3528	25.3857	TRUE	0.114708	0.363479	1.28652			23.6584	24.2221	23.9044	23.3124	24.3115	23.8818	24.0081	24.5859	24.1356	23.6032	24.2738	24.1213	TRUE	0.0307313	0.239531	1.18061
P61019	RAB2A	RAB2A RAB2	Ras-related protein Rab-2A	14	25.7289	25.2669	25.137	25.4382	25.7721	25.4686	26.0799	25.7057	25.2602	25.8953	26.2155	25.8313	TRUE	0.00444756	0.362706	1.28584			24.276	24.3937	24.1641	24.3418	24.2145	24.278	24.778	24.4325	24.4505	24.5907	24.6064	24.5716	TRUE	0.0192688	0.293618	1.22571
O14662	STX16	STX16	Syntaxin-16 (Syn16)	3	20.5812	19.3019	19.7954	20.2958	19.8877	19.9724	20.5372	21.106	20.5449	20.8916	18.5938	20.3347	TRUE	0.516275	0.362301	1.28547			18.5288	18.5324	18.9862	19.2673	18.9723	18.8574	19.0269	19.5889	19.4531	19.0115	18.1958	19.0552	TRUE	0.570485	0.197853	1.14699
P08758	ANXA5	ANXA5 ANX5 ENX2 PP4	Annexin A5 (Anchorin CII) (Annexin V) (Annexin-5) (Calphobindin I) (CBP-I) (Endonexin II) (Lipocortin V) (Placental anticoagulant protein 4) (PP4) (Placental anticoagulant protein I) (PAP-I) (Thromboplastin inhibitor) (Vascular anticoagulant-alpha) (VAC-alpha)	18	25.9282	25.5176	26.2452	25.796	25.5898	25.8153	26.2885	26.0227	26.2588	26.4259	25.8872	26.1766	TRUE	0.0257842	0.361277	1.28456			24.9629	25.9582	25.1961	23.9083	24.5457	24.9143	25.5668	26.0373	25.4474	24.789	24.9872	25.3655	TRUE	0.0314687	0.45127	1.36724
Q13501	SQSTM1	SQSTM1 ORCA OSIL	Sequestosome-1 (EBI3-associated protein of 60 kDa) (EBIAP) (p60) (Phosphotyrosine-independent ligand for the Lck SH2 domain of 62 kDa) (Ubiquitin-binding protein p62)	6	21.6744	22.3521	22.0901	22.1007	22.0786	22.0592	22.6432	22.2494	23.0688	22.1808	21.9505	22.4185	TRUE	0.229143	0.359359	1.28286			20.9192	21.1732	21.5974	18.2967	21.1702	20.6313	21.0632	22.2516	21.6016	20.4697	21.401	21.3574	TRUE	0.149463	0.726065	1.65412					TRUE
Q8N8Y2	ATP6V0D2	ATP6V0D2	V-type proton ATPase subunit d 2 (V-ATPase subunit d 2) (Vacuolar proton pump subunit d 2)	2	19.7617	18.006	18.8409	18.2803	20.403	19.0584	19.1135	19.5855	19.6718	18.555	20.1518	19.4155		0.416036	0.357166	1.28091			17.7352	18.9678	18.5833	19.1139	19.3099	18.742	18.2833	19.5699	18.3915	19.8971	20.9297	19.4143	TRUE	0.0809836	0.672286	1.5936
Q16134	ETFDH	ETFDH	Electron transfer flavoprotein-ubiquinone oxidoreductase, mitochondrial (ETF-QO) (ETF-ubiquinone oxidoreductase) (EC 1.5.5.1) (Electron-transferring-flavoprotein dehydrogenase) (ETF dehydrogenase)	5	22.0431	22.2744	19.2563	22.0673	22.2966	21.5876	21.7173	21.8565	22.0199	22.022	22.107	21.9446	TRUE	0.586806	0.357019	1.28078			21.3653	20.7634	20.6477	20.719	20.6929	20.8377	20.7876	21.0521	20.6545	20.2336	20.8267	20.7109	TRUE	0.501489	-0.126776	0.915876
Q71DI3	HIST2H3A;	HIST2H3A; HIST2H3C H3F2 H3FM; HIST2H3D	Histone H3.2 (Histone H3/m) (Histone H3/o)	4	26.9052	27.2148	27.7821	27.1123	26.2689	27.0567	27.1151	27.1854	27.6381	27.7185	27.3885	27.4091	TRUE	0.201505	0.352441	1.27672			26.0646	26.1062	26.7621	25.8343	25.5328	26.06	26.3502	25.8516	26.7117	25.7306	25.8243	26.0937	TRUE	0.773159	0.0337086	1.02364
Q5T5C0	STXBP5	STXBP5 LLGL3	Syntaxin-binding protein 5 (Lethal(2) giant larvae protein homolog 3) (Tomosyn-1)	11	22.2005	22.901	21.9317	22.1911	22.7283	22.3905	22.5454	23.0317	22.594	22.7547	22.7765	22.7404	TRUE	0.0421744	0.349929	1.2745			21.6512	21.1335	21.3106	21.8623	21.974	21.5863	21.9574	21.7451	21.7535	22.0826	21.9493	21.8976	TRUE	0.0436616	0.31126	1.24079
Q9NS69	TOMM22	TOMM22 TOM22	Mitochondrial import receptor subunit TOM22 homolog (hTom22) (1C9-2) (Translocase of outer membrane 22 kDa subunit homolog)	4	20.7481	20.2412	20.1772	20.5689	20.2249	20.3921	20.8366	20.514	20.5011	20.9675	20.8861	20.7411	TRUE	0.0201303	0.34898	1.27366			19.3885	19.0796	19.403	20.2272	20.0683	19.6333	18.9384	19.47	19.0457	20.1859	17.5845	19.0449	TRUE	0.301248	-0.588397	0.665081
O75348	ATP6V1G1	ATP6V1G1 ATP6G ATP6G1 ATP6J	V-type proton ATPase subunit G 1 (V-ATPase subunit G 1) (V-ATPase 13 kDa subunit 1) (Vacuolar proton pump subunit G 1) (Vacuolar proton pump subunit M16)	5	20.7333	20.9791	18.7985	20.876	19.2464	20.1267	20.9219	19.017	21.0447	20.9829	20.4086	20.475	TRUE	0.64294	0.348388	1.27314			17.7243	18.3671	18.0135	18.2761	18.3169	18.1396	18.5257	17.1124	18.7439	18.8416	19.4703	18.5388		0.400207	0.399206	1.31878
O75936	BBOX1	BBOX1 BBH BBOX	Gamma-butyrobetaine dioxygenase (EC 1.14.11.1) (Gamma-butyrobetaine hydroxylase) (Gamma-BBH) (Gamma-butyrobetaine,2-oxoglutarate dioxygenase)	5	20.8191	21.2406	22.3264	21.895	19.2819	21.1126	21.0743	21.76	22.0922	22.5142	19.8528	21.4587	TRUE	0.0938658	0.346095	1.27112			20.2153	22.207	18.7967	19.1795	20.0204	20.0838	20.8734	21.2652	21.0314	20.4411	19.5293	20.6281	TRUE	0.399142	0.54431	1.45832					TRUE
P05090	APOD	APOD	Apolipoprotein D (Apo-D) (ApoD)	5	22.6122	23.4343	23.711	23.3033	23.2441	23.261	23.7396	23.7711	23.409	23.656	23.4559	23.6063	TRUE	0.206001	0.345353	1.27046			21.8935	22.494	21.9194	21.5132	20.8025	21.7245	22.3575	21.7697	21.9325	21.1892	21.0329	21.6564	TRUE	0.760865	-0.0681522	0.953859
Q9Y266	NUDC	NUDC	Nuclear migration protein nudC (Nuclear distribution protein C homolog)	5	22.7706	23.3676	22.4143	23.2431	22.8503	22.9292	23.5418	23.0093	23.2275	22.8998	23.6909	23.2739	TRUE	0.291841	0.344703	1.26989			22.4184	21.7235	22.0769	22.2297	22.594	22.2085	22.306	21.8422	22.2585	21.7793	21.8155	22.0003	TRUE	0.313047	-0.208187	0.865625
P37802	TAGLN2	TAGLN2 KIAA0120 CDABP0035	Transgelin-2 (Epididymis tissue protein Li 7e) (SM22-alpha homolog)	9	22.7956	22.6589	23.2364	23.1133	21.4698	22.6548	23.0527	22.7842	23.241	23.6489	22.2697	22.9993	TRUE	0.0750997	0.34446	1.26968			21.6647	22.6269	21.2678	20.7001	21.3742	21.5267	21.3112	22.5554	21.0453	20.6732	21.7691	21.4709	TRUE	0.681754	-0.0558895	0.962001
O14639	ABLIM1	ABLIM1 ABLIM KIAA0059 LIMAB1	Actin-binding LIM protein 1 (abLIM-1) (Actin-binding LIM protein family member 1) (Actin-binding double zinc finger protein) (LIMAB1) (Limatin)	16	24.221	24.1776	23.3141	24.4551	23.1553	23.8646	24.2636	24.1708	24.6781	24.4959	23.4292	24.2075	TRUE	0.257477	0.342932	1.26833			22.0797	22.3102	22.5074	22.0766	23.3331	22.4614	22.2706	22.5483	22.8907	21.7786	22.6223	22.4221	TRUE	0.856038	-0.0393196	0.973114
O00115	DNASE2	DNASE2 DNASE2A DNL2	Deoxyribonuclease-2-alpha (EC 3.1.22.1) (Acid DNase) (Deoxyribonuclease II alpha) (DNase II alpha) (Lysosomal DNase II) (R31240_2)	2	18.6563	18.6638	19.4292	20.0246	18.8418	19.1231	19.571	19.6183	19.0754	18.9945	20.0678	19.4654		0.478972	0.342274	1.26775			19.1759	19.1054	17.6553	19.4269	19.0594	18.8846	18.5806	19.0807	18.3097	17.9441	19.2485	18.6327	TRUE	0.530742	-0.251859	0.839814
P53990	IST1	IST1 KIAA0174	IST1 homolog (hIST1) (Putative MAPK-activating protein PM28)	5	21.8159	22.0196	18.5219	22.9354	19.5535	20.9693	22.0385	22.7205	18.5204	21.4339	21.8378	21.3102	TRUE	0.605791	0.340949	1.26659			20.2504	20.7696	20.3167	19.6565	17.1942	19.6375	21.2303	20.6345	21.2495	21.6618	17.9442	20.5441	TRUE	0.0563808	0.906602	1.87463
Q8NEU8	APPL2	APPL2 DIP13B	DCC-interacting protein 13-beta (Dip13-beta) (Adapter protein containing PH domain, PTB domain and leucine zipper motif 2)	2	18.8251	18.7267	19.3777	19.3744	20.3671	19.3342	19.8711	19.3618	19.2899	20.1666	19.6841	19.6747		0.344217	0.340526	1.26622			18.4701	18.7218	18.2031	18.3876	18.1743	18.3914	19.6252	19.2997	18.8623	18.1295	19.072	18.9977	TRUE	0.0637434	0.606386	1.52244
Q9H9A6	LRRC40	LRRC40	Leucine-rich repeat-containing protein 40	5	20.4219	20.9085	20.3715	19.5564	18.889	20.0294	20.3035	20.5991	20.0147	20.6023	20.3302	20.37	TRUE	0.416423	0.340521	1.26621			19.5348	19.9088	18.4672	19.3546	19.2482	19.3027	18.9144	19.4184	19.0897	19.2219	19.2335	19.1756	TRUE	0.590929	-0.127141	0.915644
P23381	WARS1	WARS1 IFI53 WARS WRS	Tryptophan--tRNA ligase, cytoplasmic (EC 6.1.1.2) (Interferon-induced protein 53) (IFP53) (Tryptophanyl-tRNA synthetase) (TrpRS) (hWRS) [Cleaved into: T1-TrpRS; T2-TrpRS]	8	22.2507	21.5155	21.6391	21.4427	23.0485	21.9793	22.331	21.6575	21.757	22.5408	23.3091	22.3191	TRUE	0.151433	0.339779	1.26556			21.8357	21.9019	21.4167	21.2227	21.6383	21.603	22.2901	21.8055	22.2046	21.7073	22.0146	22.0044	TRUE	0.0482191	0.401388	1.32078
Q99536	VAT1	VAT1	Synaptic vesicle membrane protein VAT-1 homolog (EC 1.-.-.-)	9	22.506	23.8169	23.5397	23.7261	22.7778	23.2733	23.474	23.8387	23.8375	24.3915	22.5124	23.6108	TRUE	0.2001	0.337507	1.26357			22.4443	23.2478	22.3721	21.4978	22.0096	22.3143	22.6268	23.007	22.4174	22.0294	22.4575	22.5076	TRUE	0.238388	0.193278	1.14336
P30038	ALDH4A1	ALDH4A1 ALDH4 P5CDH	Delta-1-pyrroline-5-carboxylate dehydrogenase, mitochondrial (P5C dehydrogenase) (EC 1.2.1.88) (Aldehyde dehydrogenase family 4 member A1) (L-glutamate gamma-semialdehyde dehydrogenase)	13	25.8195	25.8357	25.2831	25.7188	25.4415	25.6197	26.0924	26.1468	26.0557	25.9404	25.5445	25.956	TRUE	0.0426188	0.336268	1.26249			24.4273	24.8697	24.8872	24.1936	25.5361	24.7828	24.8122	25.0688	24.849	24.8407	25.4904	25.0122	TRUE	0.156434	0.22944	1.17238
Q9H479	FN3K	FN3K	Fructosamine-3-kinase (EC 2.7.1.171) (Protein-psicosamine 3-kinase FN3K) (Protein-ribulosamine 3-kinase FN3K) (EC 2.7.1.172)	7	23.1884	23.6171	22.4452	23.1511	22.8847	23.0573	23.4527	23.325	23.2547	23.7221	23.2062	23.3921	TRUE	0.143356	0.334859	1.26125			22.3106	22.7424	22.6406	22.4738	22.2453	22.4825	22.341	22.17	22.8253	22.6424	22.337	22.4631	TRUE	0.89714	-0.0194138	0.986634
Q5SQI0	ATAT1	ATAT1 C6orf134 MEC17 Nbla00487	Alpha-tubulin N-acetyltransferase 1 (Alpha-TAT) (Alpha-TAT1) (TAT) (EC 2.3.1.108) (Acetyltransferase mec-17 homolog)	5	22.1175	22.9395	21.5635	22.5286	22.17	22.2638	22.1885	23.0371	22.6909	22.7275	22.3484	22.5985	TRUE	0.168962	0.33466	1.26108			21.0825	20.5359	20.8266	21.3298	21.0809	20.9711	21.0053	21.0075	20.6816	20.8632	20.5958	20.8307	TRUE	0.464145	-0.140475	0.907221
O15212	PFDN6	PFDN6 HKE2 PFD6	Prefoldin subunit 6 (Protein Ke2)	2	21.2462	20.7287	19.0066	22.0087	20.4437	20.6868	22.2712	22.0095	21.2612	18.4079	21.1531	21.0206	TRUE	0.759241	0.333755	1.26029			20.4939	20.3043	19.7307	20.9791	20.5189	20.4054	19.9594	20.0489	19.7018	20.5278	16.2168	19.2909	TRUE	0.236841	-1.11447	0.461861
Q9BXK5	BCL2L13	BCL2L13 MIL1 CD003	Bcl-2-like protein 13 (Bcl2-L-13) (Bcl-rambo) (Protein Mil1)	3	21.4115	18.7025	18.9636	19.2424	20.2568	19.7154	20.8643	20.6065	18.6781	20.4011	19.6949	20.049		0.545231	0.333627	1.26018			20.0967	19.9981	20.2596	20.283	20.1377	20.155	20.2258	19.7556	19.8549	20.0144	19.4379	19.8577	TRUE	0.0907395	-0.297296	0.813776
P04792	HSPB1	HSPB1 HSP27 HSP28	Heat shock protein beta-1 (HspB1) (28 kDa heat shock protein) (Estrogen-regulated 24 kDa protein) (Heat shock 27 kDa protein) (HSP 27) (Stress-responsive protein 27) (SRP27)	19	28.7486	27.0506	29.4794	27.9054	27.343	28.1054	29.4227	28.189	28.5199	28.8638	27.1939	28.4379	TRUE	0.443111	0.332503	1.2592			25.9758	26.6176	25.6227	25.4513	26.4326	26.02	26.4508	26.994	26.0481	25.6062	26.6382	26.3475	TRUE	0.00637199	0.32747	1.25481					TRUE
Q9P121	NTM	NTM IGLON2 NT UNQ297/PRO337	Neurotrimin (hNT) (IgLON family member 2)	6	23.0221	23.0738	22.1788	22.3821	18.2127	21.7739	21.9675	22.2228	22.6332	22.0518	21.6559	22.1062	TRUE	0.706072	0.332344	1.25906			21.9321	21.7271	22.2826	21.3999	21.0709	21.6825	21.575	21.5705	21.8169	21.5288	21.674	21.633	TRUE	0.809221	-0.0495049	0.966268
P10412	H1-4	H1-4 H1F4 HIST1H1E	Histone H1.4 (Histone H1b) (Histone H1s-4)	10	25.8328	26.6909	26.3693	26.6574	26.129	26.3359	26.4586	26.4865	27.1752	26.6959	26.523	26.6678	TRUE	0.148121	0.331953	1.25872			25.4462	25.1524	25.4878	25.0531	24.7083	25.1696	25.5836	24.93	25.6667	24.4532	24.8598	25.0987	TRUE	0.663847	-0.0708969	0.952046
P25098	GRK2	GRK2 ADRBK1 BARK BARK1	Beta-adrenergic receptor kinase 1 (Beta-ARK-1) (EC 2.7.11.15) (G-protein coupled receptor kinase 2)	9	21.8642	21.8502	21.3763	21.9413	21.4485	21.6961	22.1288	22.1383	21.8642	22.4398	21.5548	22.0252	TRUE	0.0112453	0.329079	1.25621			20.3901	20.2753	20.3258	20.7639	20.9518	20.5414	20.4867	20.4926	20.3212	20.7797	20.8124	20.5785	TRUE	0.562233	0.0371716	1.0261
Q15118	PDK1	PDK1 PDHK1	[Pyruvate dehydrogenase (acetyl-transferring)] kinase isozyme 1, mitochondrial (EC 2.7.11.2) (Pyruvate dehydrogenase kinase isoform 1) (PDH kinase 1)	2	19.3339	19.6371	18.917	18.7421	19.6197	19.2499	19.0394	18.9034	20.573	18.8473	20.5299	19.5786	TRUE	0.485547	0.32867	1.25585			17.942	18.9735	18.0229	18.7269	17.1079	18.1546	18.486	17.7454	18.5051	17.3512	16.7756	17.7727		0.400939	-0.38197	0.767389
P09874	PARP1	PARP1 ADPRT PPOL	Poly [ADP-ribose] polymerase 1 (PARP-1) (EC 2.4.2.30) (ADP-ribosyltransferase diphtheria toxin-like 1) (ARTD1) (DNA ADP-ribosyltransferase PARP1) (EC 2.4.2.-) (NAD(+) ADP-ribosyltransferase 1) (ADPRT 1) (Poly[ADP-ribose] synthase 1) (Protein poly-ADP-ribosyltransferase PARP1) (EC 2.4.2.-)	5	20.6611	20.9616	20.3987	20.8869	20.0355	20.5888	20.649	20.8932	20.8478	21.1416	21.0327	20.9129	TRUE	0.167378	0.324126	1.25191			19.9379	19.9523	20.2364	19.4836	19.963	19.9146	19.0881	19.3524	18.7897	19.6474	19.5612	19.2878	TRUE	0.0767716	-0.626871	0.647579
Q14155	ARHGEF7	ARHGEF7 COOL1 KIAA0142 P85SPR PAK3BP PIXB Nbla10314	Rho guanine nucleotide exchange factor 7 (Beta-Pix) (COOL-1) (PAK-interacting exchange factor beta) (p85)	7	21.5204	21.9391	20.9433	21.6907	21.2526	21.4692	21.8929	22.0328	21.552	21.7411	21.743	21.7923	TRUE	0.0417235	0.323145	1.25105			20.6963	20.5087	20.7094	20.9301	20.6624	20.7014	20.3682	20.5651	19.7751	21.0975	20.711	20.5034	TRUE	0.383059	-0.197991	0.871764
Q9NX46	ADPRHL2	ADPRHL2 ARH3	ADP-ribose glycohydrolase ARH3 (ADP-ribosylhydrolase 3) (O-acetyl-ADP-ribose deacetylase ARH3) (EC 3.5.1.-) (Poly(ADP-ribose) glycohydrolase ARH3) (EC 3.2.1.143) ([Protein ADP-ribosylarginine] hydrolase-like protein 2) ([Protein ADP-ribosylserine] hydrolase) (EC 3.2.2.-)	2	19.3327	19.9814	19.7053	20.1632	18.0679	19.4501	19.6979	19.0218	19.2194	20.2487	20.6708	19.7717		0.628415	0.321638	1.24975			19.7131	20.2325	18.3437	20.103	19.8359	19.6456	19.7327	19.8833	19.878	20.0828	19.6082	19.837	TRUE	0.606162	0.191332	1.14182
P00441	SOD1	SOD1	Superoxide dismutase [Cu-Zn] (EC 1.15.1.1) (Superoxide dismutase 1) (hSod1)	9	24.7713	24.6333	24.7118	24.357	26.5297	25.0006	25.1116	24.9214	25.1439	24.8323	26.6022	25.3223	TRUE	0.0103209	0.321633	1.24974			24.8201	24.0368	24.8269	23.9704	23.8009	24.291	25.2749	24.4065	25.0582	24.1843	23.9805	24.5809	TRUE	0.00522212	0.289857	1.22252
Q15691	MAPRE1	MAPRE1	Microtubule-associated protein RP/EB family member 1 (APC-binding protein EB1) (End-binding protein 1) (EB1)	7	22.4556	22.6664	22.5684	22.7742	21.155	22.3239	22.916	23.2992	22.8208	23.1535	21.0334	22.6446	TRUE	0.0644897	0.320669	1.24891			21.5859	21.9385	21.5454	21.0454	21.3267	21.4884	21.9369	21.6667	21.3355	20.7955	21.3057	21.4081	TRUE	0.52856	-0.0803444	0.945832
O00442	RTCA	RTCA RPC RPC1 RTC1 RTCD1	RNA 3'-terminal phosphate cyclase (RNA cyclase) (RNA-3'-phosphate cyclase) (EC 6.5.1.4) (RNA terminal phosphate cyclase domain-containing protein 1) (RTC domain-containing protein 1)	4	18.7341	19.4793	18.9552	19.3523	20.5389	19.412	18.9409	19.9351	20.5841	18.6926	20.5088	19.7323		0.442232	0.320314	1.2486			19.9882	17.4822	18.3136	19.3884	17.9546	18.6254	19.2009	19.558	18.6585	19.5842	19.7034	19.341	TRUE	0.247073	0.71563	1.6422
Q92572	AP3S1	AP3S1 CLAPS3	AP-3 complex subunit sigma-1 (AP-3 complex subunit sigma-3A) (Adaptor-related protein complex 3 subunit sigma-1) (Clathrin-associated/assembly/adaptor protein, small 3) (Sigma-3A-adaptin) (Sigma3A-adaptin) (Sigma-adaptin 3a)	3	21.0198	21.3242	18.8318	21.7489	19.6883	20.5226	21.2476	21.5499	21.4623	20.0806	19.8741	20.8429	TRUE	0.663472	0.320305	1.24859			17.2912	18.3696	20.1717	18.0218	18.1382	18.3985	17.6458	17.8435	19.2204	20.7282	20.4643	19.1805		0.350893	0.781973	1.71948
Q15049	MLC1	MLC1 KIAA0027 WKL1	Membrane protein MLC1	8	23.048	23.119	22.2771	23.7295	21.1246	22.6597	23.8422	23.5087	22.762	23.9215	20.8589	22.9787	TRUE	0.143345	0.319003	1.24747			20.9909	22.5355	20.9423	20.3755	21.9747	21.3638	20.8231	22.3303	21.4766	21.0565	22.2053	21.5784	TRUE	0.297327	0.214579	1.16036
Q07866	KLC1	KLC1 KLC KNS2	Kinesin light chain 1 (KLC 1)	11	22.9225	23.8022	22.5172	23.5898	23.1484	23.196	23.0262	23.2723	24.1478	23.4142	23.7122	23.5145	TRUE	0.441982	0.318509	1.24704			21.8517	21.4545	21.8047	22.2013	22.08	21.8784	22.3235	22.1612	22.0236	21.7642	21.6482	21.9841	TRUE	0.674368	0.105712	1.07603
Q9NTX5	ECHDC1	ECHDC1	Ethylmalonyl-CoA decarboxylase (EC 4.1.1.94) (Enoyl-CoA hydratase domain-containing protein 1) (Methylmalonyl-CoA decarboxylase) (MMCD)	4	22.0713	21.8694	21.5661	21.7429	19.8548	21.4209	22.0238	21.6768	21.3403	22.0224	21.6265	21.738	TRUE	0.444837	0.317084	1.24581			20.7035	21.0521	20.4736	20.3573	20.3249	20.5823	20.7298	20.249	20.7862	20.2227	20.2781	20.4532	TRUE	0.522519	-0.129099	0.914403
Q9Y4F1	FARP1	FARP1 CDEP PLEKHC2	FERM, ARHGEF and pleckstrin domain-containing protein 1 (Chondrocyte-derived ezrin-like protein) (FERM, RhoGEF and pleckstrin domain-containing protein 1) (Pleckstrin homology domain-containing family C member 2) (PH domain-containing family C member 2)	15	24.26	25.0537	24.0429	23.8866	23.6098	24.1706	24.5006	24.72	24.9444	24.2622	24.0076	24.487	TRUE	0.184557	0.316374	1.2452			22.5289	23.1093	22.1404	22.3778	22.8956	22.6104	22.8632	23.2392	22.9724	22.6219	23.0964	22.9586	TRUE	0.0499904	0.348194	1.27297
P25787	PSMA2	PSMA2 HC3 PSC3	Proteasome subunit alpha type-2 (EC 3.4.25.1) (Macropain subunit C3) (Multicatalytic endopeptidase complex subunit C3) (Proteasome component C3)	5	22.0296	20.2006	23.8394	22.0056	21.5453	21.9241	23.0093	22.0911	21.8342	21.951	22.3128	22.2397	TRUE	0.656365	0.315576	1.24451			22.1111	21.8027	21.9193	21.6029	21.6464	21.8165	21.9084	21.8726	21.8751	21.6075	22.1323	21.8792	TRUE	0.614441	0.062714	1.04443
Q15181	PPA1	PPA1 IOPPP PP	Inorganic pyrophosphatase (EC 3.6.1.1) (Pyrophosphate phospho-hydrolase) (PPase)	5	22.0032	21.9875	21.6415	22.2882	21.9384	21.9718	22.2185	22.46	22.1944	22.2706	22.2846	22.2856	TRUE	0.0356855	0.313846	1.24302			21.5849	22.2127	21.8311	18.031	21.7207	21.0761	21.4362	21.5849	21.392	21.3333	21.2424	21.3978	TRUE	0.689766	0.321687	1.24979
P02679	FGG	FGG PRO2061	Fibrinogen gamma chain	11	23.0453	23.5395	24.168	23.5801	22.4057	23.3477	22.7893	23.6094	24.3744	24.0062	23.52	23.6599	TRUE	0.24462	0.312118	1.24153			21.5043	23.0248	21.6871	20.8875	22.1763	21.856	22.5379	22.8933	22.0849	21.844	22.7231	22.4166	TRUE	0.0561796	0.560633	1.47492
P14543	NID1	NID1 NID	Nidogen-1 (NID-1) (Entactin)	8	22.5031	21.776	21.6601	21.8733	21.9464	21.9518	21.9076	22.0309	22.5438	22.8878	21.935	22.261	TRUE	0.354992	0.309269	1.23908			21.0311	21.6234	21.1304	21.3717	19.9587	21.0231	21.2629	21.2336	20.9005	20.406	20.6331	20.8872	TRUE	0.651472	-0.135845	0.910136
O76054	SEC14L2	SEC14L2 C22orf6 KIAA1186 KIAA1658	SEC14-like protein 2 (Alpha-tocopherol-associated protein) (TAP) (hTAP) (Squalene transfer protein) (Supernatant protein factor) (SPF)	8	23.2781	23.7088	21.9737	23.499	22.4229	22.9765	22.8558	23.4153	23.9506	23.607	22.5977	23.2853	TRUE	0.514522	0.308813	1.23869			21.5233	22.6437	21.4018	20.929	21.7037	21.6403	22.1007	22.7005	22.2562	20.6091	20.8079	21.6949	TRUE	0.869931	0.0545841	1.03856
Q9Y4G8	RAPGEF2	RAPGEF2 KIAA0313 NRAPGEP PDZGEF1	Rap guanine nucleotide exchange factor 2 (Cyclic nucleotide ras GEF) (CNrasGEF) (Neural RAP guanine nucleotide exchange protein) (nRap GEP) (PDZ domain-containing guanine nucleotide exchange factor 1) (PDZ-GEF1) (RA-GEF-1) (Ras/Rap1-associating GEF-1)	6	21.937	21.1255	21.1831	21.5725	22.2404	21.6117	21.392	21.8162	21.9045	21.6811	22.8077	21.9203	TRUE	0.267863	0.308614	1.23852			20.6086	20.739	20.4183	21.0235	21.0389	20.7657	20.7777	20.6754	21.027	21.1241	20.8363	20.8881	TRUE	0.424141	0.122449	1.08858
Q8WY54	PPM1E	PPM1E CAMKN KIAA1072 POPX1	Protein phosphatase 1E (EC 3.1.3.16) (Ca(2+)/calmodulin-dependent protein kinase phosphatase N) (CaMKP-N) (CaMKP-nucleus) (CaMKN) (Partner of PIX 1) (Partner of PIX-alpha) (Partner of PIXA)	6	21.4363	21.5264	20.0596	21.8191	22.0225	21.3728	21.3721	21.6613	21.4461	22.3345	21.5889	21.6806	TRUE	0.377249	0.3078	1.23782			21.3277	21.4859	18.9737	19.1794	20.4472	20.2828	19.8332	20.1468	19.2287	19.1196	20.2037	19.7064	TRUE	0.177942	-0.576362	0.670653
P20042	EIF2S2	EIF2S2 EIF2B	Eukaryotic translation initiation factor 2 subunit 2 (Eukaryotic translation initiation factor 2 subunit beta) (eIF-2-beta)	2	18.6908	18.7015	19.9628	18.9458	20.3672	19.3336	19.0901	19.4713	19.8931	19.9147	19.8178	19.6374		0.334556	0.30378	1.23437			18.6314	19.2954	19.2951	17.6294	19.929	18.9561	19.3784	19.1904	19.3494	17.3121	19.1536	18.8768	TRUE	0.766332	-0.079285	0.946527
Q16864	ATP6V1F	ATP6V1F ATP6S14 VATF	V-type proton ATPase subunit F (V-ATPase subunit F) (V-ATPase 14 kDa subunit) (Vacuolar proton pump subunit F)	5	22.9523	22.9219	22.7096	23.2397	23.0022	22.9651	22.7719	23.0048	23.7574	23.4935	23.3167	23.2688	TRUE	0.21235	0.303716	1.23432			22.3365	21.7087	21.6647	22.2625	22.3621	22.0669	21.9872	21.3981	22.158	22.383	22.29	22.0433	TRUE	0.886006	-0.0236298	0.983755
Q9NQ66	PLCB1	PLCB1 KIAA0581	1-phosphatidylinositol 4,5-bisphosphate phosphodiesterase beta-1 (EC 3.1.4.11) (PLC-154) (Phosphoinositide phospholipase C-beta-1) (Phospholipase C-I) (PLC-I) (Phospholipase C-beta-1) (PLC-beta-1)	27	24.1867	24.8188	22.9751	24.2508	25.1388	24.274	24.1894	24.4305	24.3309	24.1449	25.7883	24.5768	TRUE	0.388599	0.302796	1.23353			24.0904	23.3998	24.0469	24.3099	23.5782	23.885	24.0939	23.4063	23.823	24.1713	23.5701	23.8129	TRUE	0.196782	-0.0721138	0.951243
Q9HAV0	GNB4	GNB4	Guanine nucleotide-binding protein subunit beta-4 (Transducin beta chain 4)	11	19.7977	20.7006	20.2981	19.2097	19.1764	19.8365	22.0327	20.4165	19.0012	19.9272	19.3144	20.1384		0.632814	0.301896	1.23276			20.86	21.0933	20.6356	20.546	20.6092	20.7488	18.2883	21.4676	20.8557	16.7029	20.6117	19.5853	TRUE	0.247615	-1.16357	0.446406
Q92820	GGH	GGH	Gamma-glutamyl hydrolase (EC 3.4.19.9) (Conjugase) (GH) (Gamma-Glu-X carboxypeptidase)	4	18.9512	18.1584	21.4631	19.2299	19.2732	19.4151	19.5684	19.6088	20.0955	19.6519	19.6537	19.7157	TRUE	0.548937	0.300532	1.2316			20.0576	19.107	19.3761	18.1359	17.5391	18.8431	18.7774	18.6937	19.2183	18.5514	18.3468	18.7175		0.744178	-0.12563	0.916604
Q9UPY6	WASF3	WASF3 KIAA0900 SCAR3 WAVE3	Wiskott-Aldrich syndrome protein family member 3 (WASP family protein member 3) (Protein WAVE-3) (Verprolin homology domain-containing protein 3)	5	23.0244	22.8156	19.6343	22.0996	21.9222	21.8992	22.4269	22.4581	21.9901	22.7781	21.3376	22.1982	TRUE	0.624887	0.298933	1.23023			20.4396	20.5343	20.7207	21.1376	21.5592	20.8783	20.5231	20.5095	20.5346	20.7243	21.2434	20.707	TRUE	0.133254	-0.171337	0.888019
Q96MZ0	GDAP1L1	GDAP1L1	Ganglioside-induced differentiation-associated protein 1-like 1 (GDAP1-L1)	5	22.0978	19.5124	20.3858	21.1919	21.5482	20.9472	21.548	21.8685	20.1766	20.9202	21.7122	21.2451	TRUE	0.602067	0.297907	1.22936			20.2806	20.6468	20.8216	20.9627	20.8831	20.719	20.533	20.8551	20.9443	21.0139	20.9804	20.8653	TRUE	0.0164231	0.146379	1.10679
Q9Y333	LSM2	LSM2 C6orf28 G7B	U6 snRNA-associated Sm-like protein LSm2 (Protein G7b) (Small nuclear ribonuclear protein D homolog) (snRNP core Sm-like protein Sm-x5)	1	19.8088	20.125	18.5029	19.2595	18.6935	19.2779	19.476	19.5195	20.3167	19.6886	18.8632	19.5728	TRUE	0.522347	0.294846	1.22675			17.8738	18.0757	18.3514	18.2351	18.2875	18.1647	18.0211	18.2607	19.1319	18.048	18.5911	18.4105	TRUE	0.191333	0.245858	1.1858
Q9UIJ7	AK3	AK3 AK3L1 AK6 AKL3L	GTP:AMP phosphotransferase AK3, mitochondrial (EC 2.7.4.10) (Adenylate kinase 3) (AK 3) (Adenylate kinase 3 alpha-like 1)	12	24.3574	24.128	23.9184	24.5466	24.0088	24.1919	24.509	24.3705	24.5726	24.7872	24.1906	24.486	TRUE	0.0326488	0.294113	1.22613			23.211	23.5836	23.0423	23.2734	23.1611	23.2543	23.2581	23.706	23.1058	23.5532	23.4922	23.4231	TRUE	0.0431274	0.168774	1.1241
Q9UHY7	ENOPH1	ENOPH1 MASA MSTP145	Enolase-phosphatase E1 (EC 3.1.3.77) (2,3-diketo-5-methylthio-1-phosphopentane phosphatase) (MASA homolog)	4	19.1588	18.8005	19.3199	18.6432	21.3647	19.4574	20.0474	18.3465	19.4179	20.1612	20.7822	19.751		0.504738	0.293613	1.22571			19.4388	20.7267	19.6476	19.3781	20.383	19.9148	19.7278	20.161	20.0811	19.4354	19.5229	19.7856	TRUE	0.632728	-0.129183	0.914349
P61026	RAB10	RAB10	Ras-related protein Rab-10	6	24.9586	25.3676	25.4704	25.2185	25.1799	25.239	24.8698	25.6484	25.8667	25.5186	25.7522	25.5312	TRUE	0.054249	0.292137	1.22445			23.8658	23.6033	24.2266	23.9081	24.3106	23.9829	23.9321	24.1623	24.1162	23.7682	24.6685	24.1295	TRUE	0.341507	0.146557	1.10692
O43157	PLXNB1	PLXNB1 KIAA0407 PLXN5 SEP	Plexin-B1 (Semaphorin receptor SEP)	5	21.2452	20.4532	20.3236	20.8698	19.6643	20.5112	21.0432	20.8819	19.917	21.5067	20.6664	20.803	TRUE	0.327961	0.291814	1.22418			19.6316	20.6405	19.7293	19.6037	19.7782	19.8767	19.8583	20.6431	19.893	20.1903	20.3262	20.1822	TRUE	0.0540471	0.30549	1.23584
Q9H0B6	KLC2	KLC2	Kinesin light chain 2 (KLC 2)	6	21.4844	21.3821	21.0358	21.8621	21.1538	21.3836	21.245	21.7798	22.3532	21.3637	21.6344	21.6752	TRUE	0.409194	0.291624	1.22402			20.0125	20.0902	20.1546	20.811	20.2688	20.2674	16.4032	19.7873	19.8247	20.5537	19.9302	19.2998	TRUE	0.21683	-0.967609	0.511353
P27695	APEX1	APEX1 APE APE1 APEX APX HAP1 REF1	DNA-(apurinic or apyrimidinic site) lyase (EC 3.1.-.-) (EC 4.2.99.18) (APEX nuclease) (APEN) (Apurinic-apyrimidinic endonuclease 1) (AP endonuclease 1) (APE-1) (REF-1) (Redox factor-1) [Cleaved into: DNA-(apurinic or apyrimidinic site) lyase, mitochondrial]	4	21.1927	20.9526	21.0597	19.2939	20.102	20.5202	21.1105	20.9417	20.0469	21.4913	20.4652	20.8111	TRUE	0.610773	0.290938	1.22344			18.8849	17.2703	20.5336	18.1308	18.4371	18.6513	19.0936	20.3457	19.1152	21.0856	20.3472	19.9975	TRUE	0.193061	1.34615	2.54232
O76041	NEBL	NEBL LNEBL	Nebulette (Actin-binding Z-disk protein)	3	22.0221	22.0978	17.9121	22.1863	19.4097	20.7256	19.6604	21.6246	21.6618	22.3751	19.7581	21.016	TRUE	0.783828	0.290403	1.22298			19.0747	21.0334	20.9396	20.5438	21.2803	20.5743	20.5347	20.6355	20.7243	18.3823	20.7645	20.2082	TRUE	0.558728	-0.366074	0.775891
Q99460	PSMD1	PSMD1	26S proteasome non-ATPase regulatory subunit 1 (26S proteasome regulatory subunit RPN2) (26S proteasome regulatory subunit S1) (26S proteasome subunit p112)	10	21.7593	21.4697	21.8572	21.9378	21.4151	21.6878	22.057	22.2805	21.7787	21.5153	22.259	21.9781	TRUE	0.305324	0.290275	1.22287			21.2252	21.4853	21.1287	21.2357	20.7479	21.1646	21.1057	21.4185	21.1386	20.9949	21.3153	21.1946	TRUE	0.841037	0.0300449	1.02104
Q15084	PDIA6	PDIA6 ERP5 P5 TXNDC7	Protein disulfide-isomerase A6 (EC 5.3.4.1) (Endoplasmic reticulum protein 5) (ER protein 5) (ERp5) (Protein disulfide isomerase P5) (Thioredoxin domain-containing protein 7)	6	22.2684	22.023	22.3456	22.3624	22.7105	22.342	22.6226	22.5568	22.3471	22.7237	22.9066	22.6313	TRUE	0.0320224	0.289365	1.2221			20.9731	21.6915	21.4261	21.1428	21.6289	21.3725	21.7639	21.6796	21.8417	21.4614	21.5966	21.6686	TRUE	0.123197	0.296167	1.22788
P61457	PCBD1	PCBD1 DCOH PCBD	Pterin-4-alpha-carbinolamine dehydratase (PHS) (EC 4.2.1.96) (4-alpha-hydroxy-tetrahydropterin dehydratase) (Dimerization cofactor of hepatocyte nuclear factor 1-alpha) (DCoH) (Dimerization cofactor of HNF1) (Phenylalanine hydroxylase-stimulating protein) (Pterin carbinolamine dehydratase) (PCD)	5	22.6203	21.6383	21.5531	21.809	21.7525	21.8746	22.5908	22.0306	21.5752	22.3127	22.2955	22.161	TRUE	0.0775023	0.286336	1.21954			21.1597	21.6185	21.4981	21.2025	21.651	21.4259	21.775	21.2368	21.2071	20.7378	21.3427	21.2599	TRUE	0.448306	-0.166053	0.891278
P09455	RBP1	RBP1 CRBP1	Retinol-binding protein 1 (Cellular retinol-binding protein) (CRBP) (Cellular retinol-binding protein I) (CRBP-I)	3	18.423	18.9428	19.0369	17.6489	19.1524	18.6408	19.6879	17.573	18.4428	19.694	19.2364	18.9268		0.66701	0.285987	1.21924			18.4528	19.3671	18.5707	19.8389	18.7359	18.9931	18.558	19.3357	18.7196	17.8487	18.2676	18.5459	TRUE	0.327198	-0.447149	0.733491
Q15111	PLCL1	PLCL1	Inactive phospholipase C-like protein 1 (PLC-L1) (Phospholipase C-deleted in lung carcinoma) (Phospholipase C-related but catalytically inactive protein) (PRIP)	1	19.7466	18.3605	18.0263	19.7199	19.7832	19.1273	19.363	19.0053	20.282	18.9744	19.4413	19.4132		0.626896	0.285888	1.21916			17.7496	17.4628	18.4444	18.5528	18.0916	18.0602	19.5377	18.2123	18.2135	18.0778	18.2145	18.4511	TRUE	0.389673	0.39089	1.3112
Q14165	MLEC	MLEC KIAA0152	Malectin	2	20.6016	20.9222	19.3219	20.9442	20.5495	20.4679	20.6392	20.7328	20.5181	20.6693	21.1954	20.7509	TRUE	0.368187	0.283055	1.21677			19.7977	19.8784	19.0911	18.9433	18.8772	19.3175	18.7083	19.653	20.2254	18.6708	19.0668	19.2649	TRUE	0.891344	-0.0526718	0.964149
P53992	SEC24C	SEC24C KIAA0079	Protein transport protein Sec24C (SEC24-related protein C)	3	19.2652	19.6487	18.8921	18.9432	20.9692	19.5437	20.535	18.2694	21.2595	19.7341	19.3339	19.8264		0.733806	0.282715	1.21648			17.7369	20.1966	20.2381	20.3259	20.3151	19.7625	20.2014	20.1513	19.5116	20.4655	20.1983	20.1056	TRUE	0.56647	0.343137	1.26851
Q14315	FLNC	FLNC ABPL FLN2	Filamin-C (FLN-C) (FLNc) (ABP-280-like protein) (ABP-L) (Actin-binding-like protein) (Filamin-2) (Gamma-filamin)	11	20.5438	20.5807	20.2512	20.3127	19.7959	20.2969	21.6354	20.3192	21.1557	21.1448	18.6378	20.5786	TRUE	0.548997	0.281725	1.21565			18.3538	20.1313	18.3216	17.7315	19.4577	18.7992	18.7262	19.7551	19.7537	18.4286	17.9729	18.9273		0.809308	0.1281	1.09285
P52272	HNRNPM	HNRNPM HNRPM NAGR1	Heterogeneous nuclear ribonucleoprotein M (hnRNP M)	9	23.1652	22.3052	23.0523	23.1687	22.6624	22.8708	23.2895	23.4042	23.1102	23.3049	22.6477	23.1513	TRUE	0.245613	0.28055	1.21466			21.9919	21.8901	23.0729	22.5765	22.0421	22.3147	21.5947	21.5791	22.5719	22.2262	22.1245	22.0193	TRUE	0.0413871	-0.29541	0.814841
O14744	PRMT5	PRMT5 HRMT1L5 IBP72 JBP1 SKB1	Protein arginine N-methyltransferase 5 (PRMT5) (EC 2.1.1.320) (72 kDa ICln-binding protein) (Histone-arginine N-methyltransferase PRMT5) (Jak-binding protein 1) (Shk1 kinase-binding protein 1 homolog) (SKB1 homolog) (SKB1Hs) [Cleaved into: Protein arginine N-methyltransferase 5, N-terminally processed]	6	22.1922	22.836	22.257	22.5175	22.3574	22.432	22.0082	22.5067	23.3936	22.8756	22.7739	22.7116	TRUE	0.341665	0.279589	1.21385			21.2719	21.5084	20.9739	18.4779	21.2164	20.6897	21.4337	21.4696	21.5303	20.4764	20.6812	21.1182	TRUE	0.375456	0.428527	1.34586
Q02952	AKAP12	AKAP12 AKAP250	A-kinase anchor protein 12 (AKAP-12) (A-kinase anchor protein 250 kDa) (AKAP 250) (Gravin) (Myasthenia gravis autoantigen)	12	24.3794	24.1388	22.2946	23.8172	23.7168	23.6694	24.3438	24.0468	23.6651	23.9501	23.7281	23.9468	TRUE	0.371395	0.277406	1.21201			22.9586	22.2744	23.5763	22.9748	23.2634	23.0095	22.8624	22.7361	23.4206	23.0403	23.3741	23.0867	TRUE	0.514339	0.0771938	1.05496
Q92686	NRGN	NRGN	Neurogranin (Ng) (RC3) [Cleaved into: NEUG(55-78)]	3	27.9152	26.7976	25.2887	26.9425	27.7341	26.9356	25.9078	27.5594	27.3723	26.9146	28.3073	27.2123	TRUE	0.699599	0.276645	1.21137			26.6391	23.7149	27.4062	27.8121	27.8179	26.678	18.5333	24.7989	28.9728	27.2742	25.969	25.1096	TRUE	0.419025	-1.56837	0.337188
P55084	HADHB	HADHB MSTP029	Trifunctional enzyme subunit beta, mitochondrial (TP-beta) [Includes: 3-ketoacyl-CoA thiolase (EC 2.3.1.155) (EC 2.3.1.16) (Acetyl-CoA acyltransferase) (Beta-ketothiolase)]	19	25.4907	26.0059	25.6961	25.9018	25.2502	25.6689	25.7851	25.923	26.1514	26.3324	25.5359	25.9456	TRUE	0.0452574	0.27662	1.21135			24.3358	25.4097	24.1598	23.9048	24.4076	24.4435	24.5523	25.341	24.8842	24.4173	24.7688	24.7927	TRUE	0.0598254	0.349183	1.27384
P51149	RAB7A	RAB7A RAB7	Ras-related protein Rab-7a	14	25.789	24.6956	25.6918	25.5248	24.9965	25.3396	26.1118	25.7856	25.3085	25.8988	24.9762	25.6162	TRUE	0.321364	0.276612	1.21135			24.6573	25.1819	24.2204	24.1851	24.8059	24.6101	24.9414	25.1121	24.5562	24.6698	25.1918	24.8943	TRUE	0.0396628	0.284133	1.21768
P09382	LGALS1	LGALS1	Galectin-1 (Gal-1) (14 kDa laminin-binding protein) (HLBP14) (14 kDa lectin) (Beta-galactoside-binding lectin L-14-I) (Galaptin) (HBL) (HPL) (Lactose-binding lectin 1) (Lectin galactoside-binding soluble 1) (Putative MAPK-activating protein PM12) (S-Lac lectin 1)	7	24.7215	24.4253	24.3405	24.1399	24.3986	24.4051	24.8842	24.6417	24.5141	24.739	24.627	24.6812	TRUE	0.0278241	0.27606	1.21088			24.2865	24.8554	24.1661	23.6671	23.7653	24.1481	24.4512	24.4672	24.2203	23.552	24.2014	24.1784	TRUE	0.836402	0.0303555	1.02126
P02511	CRYAB	CRYAB CRYA2 HSPB5	Alpha-crystallin B chain (Alpha(B)-crystallin) (Heat shock protein beta-5) (HspB5) (Renal carcinoma antigen NY-REN-27) (Rosenthal fiber component)	14	27.8116	25.6867	27.8755	27.1042	26.7108	27.0378	28.1254	26.4517	27.8976	27.3681	26.7261	27.3138	TRUE	0.113372	0.276027	1.21086			25.695	26.7899	25.69	24.5481	25.9157	25.7277	25.9985	26.7409	25.4415	25.0736	26.0211	25.8551	TRUE	0.397501	0.127398	1.09232
P78357	CNTNAP1	CNTNAP1 CASPR NRXN4	Contactin-associated protein 1 (Caspr) (Caspr1) (Neurexin IV) (Neurexin-4) (p190)	33	25.6889	26.0299	25.9484	26.4806	25.9008	26.0097	26.3962	26.2451	26.0679	26.6752	26.0417	26.2852	TRUE	0.0653595	0.275505	1.21042			24.8078	24.6057	25.3112	24.7786	24.3665	24.774	25.1784	24.8733	24.9898	24.8601	24.6994	24.9202	TRUE	0.313788	0.146236	1.10668
P49354	FNTA	FNTA	Protein farnesyltransferase/geranylgeranyltransferase type-1 subunit alpha (EC 2.5.1.58) (EC 2.5.1.59) (CAAX farnesyltransferase subunit alpha) (FTase-alpha) (Ras proteins prenyltransferase subunit alpha) (Type I protein geranyl-geranyltransferase subunit alpha) (GGTase-I-alpha)	3	19.6185	18.6377	20.9457	18.1653	20.0025	19.4739	18.2507	20.6363	20.4857	19.8986	19.4676	19.7478		0.70389	0.273854	1.20903			18.4515	19.0945	18.1237	18.6029	18.1882	18.4922	18.5215	18.7249	17.4453	18.8626	18.0752	18.3259	TRUE	0.370319	-0.166256	0.891152
Q15717	ELAVL1	ELAVL1 HUR	ELAV-like protein 1 (Hu-antigen R) (HuR)	4	21.7035	21.4222	21.3876	21.9975	21.1766	21.5375	21.6816	22.0592	22.0032	22.0389	21.272	21.811	TRUE	0.132828	0.273478	1.20872			20.8341	20.5204	21.1051	21.2359	20.6833	20.8757	20.1874	20.3505	20.4295	20.8551	20.8506	20.5346	TRUE	0.0958761	-0.341148	0.789413
P06396	GSN	GSN	Gelsolin (AGEL) (Actin-depolymerizing factor) (ADF) (Brevin)	28	27.6446	27.729	27.5882	27.6511	26.9188	27.5063	27.9561	27.8233	28.1209	27.9483	27.0461	27.7789	TRUE	0.0253215	0.272615	1.208			26.4101	26.9166	26.4258	25.6545	26.7175	26.4249	26.4733	26.7902	26.7844	25.7893	26.5825	26.4839	TRUE	0.554193	0.0590164	1.04176
Q99880	H2BC13	H2BC13 H2BFC HIST1H2BL	Histone H2B type 1-L (Histone H2B.c) (H2B/c)	7	23.4109	24.4728	24.2617	23.8376	23.903	23.9772	24.6497	24.2058	24.0234	24.1746	24.1918	24.249	TRUE	0.375624	0.271851	1.20736			24.3894	23.3303	24.284	23.6424	23.0588	23.741	23.8567	22.8813	24.27	22.8361	22.886	23.346	TRUE	0.0466506	-0.394955	0.760513
Q99816	TSG101	TSG101	Tumor susceptibility gene 101 protein (ESCRT-I complex subunit TSG101)	5	21.1808	21.5702	21.9158	21.1833	18.687	20.9074	20.9543	21.4727	21.1476	21.2073	21.1127	21.1789	TRUE	0.650487	0.271491	1.20705			18.1614	19.6871	19.6464	19.4074	19.653	19.3111	19.009	19.8409	19.8982	19.7998	19.4949	19.6086	TRUE	0.145034	0.297494	1.22901
Q3ZCM7	TUBB8	TUBB8	Tubulin beta-8 chain (Tubulin beta 8 class VIII)	11	23.6582	18.9725	23.2558	20.5315	22.9194	21.8675	22.8469	22.2714	19.9854	22.0797	23.5103	22.1387	TRUE	0.818862	0.271262	1.20686			20.8929	23.9559	23.2531	23.9064	23.6184	23.1253	23.4448	23.4409	23.1646	24.0623	23.7998	23.5825	TRUE	0.443679	0.457136	1.37281
P26196	DDX6	DDX6 HLR2 RCK	Probable ATP-dependent RNA helicase DDX6 (EC 3.6.4.13) (ATP-dependent RNA helicase p54) (DEAD box protein 6) (Oncogene RCK)	4	20.9617	19.6062	21.3655	20.4651	20.9774	20.6752	21.119	20.9711	20.7267	20.8192	21.0958	20.9464	TRUE	0.44648	0.271179	1.20679			20.3579	20.6329	20.5505	20.5163	20.3954	20.4906	20.31	20.3653	20.5388	20.6556	20.2847	20.4309	TRUE	0.418393	-0.0597401	0.959437
Q53HC9	EIPR1	EIPR1 TSSC1	EARP and GARP complex-interacting protein 1 (Endosome-associated recycling protein-interacting protein) (Golgi-associated retrograde protein-interacting protein) (Tumor-suppressing STF cDNA 1 protein) (Tumor-suppressing subchromosomal transferable fragment candidate gene 1 protein)	5	22.1765	22.2663	20.3792	22.1252	21.9916	21.7878	22.2031	21.7366	22.279	21.9146	22.1609	22.0588	TRUE	0.557453	0.271046	1.20668			21.0263	20.7525	18.4323	21.4291	20.8334	20.4947	20.7474	20.2	20.9084	20.7902	20.4501	20.6192	TRUE	0.843517	0.124501	1.09013
Q66K74	MAP1S	MAP1S BPY2IP1 C19orf5 MAP8 VCY2IP1	Microtubule-associated protein 1S (MAP-1S) (BPY2-interacting protein 1) (Microtubule-associated protein 8) (Variable charge Y chromosome 2-interacting protein 1) (VCY2-interacting protein 1) (VCY2IP-1) [Cleaved into: MAP1S heavy chain; MAP1S light chain]	6	22.328	20.6862	21.5485	22.0411	21.5346	21.6277	22.2429	22.1712	21.1987	22.4468	21.4297	21.8979	TRUE	0.455801	0.270164	1.20594			20.6792	21.0704	21.8817	21.9233	21.7691	21.4647	20.7972	20.9999	21.6662	21.8899	21.3992	21.3505	TRUE	0.241029	-0.114252	0.923861
Q14344	GNA13	GNA13	Guanine nucleotide-binding protein subunit alpha-13 (G alpha-13) (G-protein subunit alpha-13)	13	23.6839	23.8439	23.8315	23.9956	22.8113	23.6332	23.8196	23.9935	24.0384	24.3058	23.3508	23.9016	TRUE	0.0226341	0.2684	1.20447			22.1602	23.5183	22.3133	21.7648	22.2184	22.395	22.312	23.1777	22.5408	22.1547	22.6984	22.5767	TRUE	0.272282	0.181701	1.13422
Q99733	NAP1L4	NAP1L4 NAP2	Nucleosome assembly protein 1-like 4 (Nucleosome assembly protein 2) (NAP-2)	9	23.5595	23.7129	22.6599	23.4575	22.4038	23.1587	23.2372	23.5392	23.5732	23.5286	23.2555	23.4267	TRUE	0.358894	0.268021	1.20415			22.1391	21.8407	21.9007	22.1015	22.4225	22.0809	22.0869	21.8072	22.2864	21.8755	22.2791	22.067	TRUE	0.901987	-0.0138592	0.99044
Q9H845	ACAD9	ACAD9	Complex I assembly factor ACAD9, mitochondrial (Acyl-CoA dehydrogenase family member 9) (ACAD-9) (EC 1.3.8.-)	4	18.776	21.8168	18.6203	20.9683	21.5508	20.3464	20.6343	20.7719	21.1908	21.1195	19.351	20.6135	TRUE	0.777841	0.267043	1.20334			19.7253	20.1381	19.0481	20.1948	20.1644	19.8541	18.3035	20.1992	20.1253	20.6822	20.1293	19.8879	TRUE	0.938859	0.0337513	1.02367
P52209	PGD	PGD PGDH	6-phosphogluconate dehydrogenase, decarboxylating (EC 1.1.1.44)	15	25.0056	24.6815	24.5284	24.6697	24.7293	24.7229	25.4125	24.7698	24.8322	24.8186	25.1127	24.9892	TRUE	0.0136923	0.266249	1.20268			23.8866	24.6176	23.5373	23.8978	23.7318	23.9342	23.9668	24.3896	23.9223	23.6427	24.0678	23.9978	TRUE	0.661987	0.0636135	1.04508
P62805	H4C1	H4C1 H4/A H4FA HIST1H4A; H4C2 H4/I H4FI HIST1H4B; H4C3 H4/G H4FG HIST1H4C; H4C4 H4/B H4FB HIST1H4D; H4C5 H4/J H4FJ HIST1H4E; H4C6 H4/C H4FC HIST1H4F; H4C8 H4/H H4FH HIST1H4H; H4C9 H4/M H4FM HIST1H4I; H4C11 H4/E H4FE HIST1H4J; H4C12 H4/D H4FD HIST1H4K; H4C13 H4/K H4FK HIST1H4L; H4C14 H4/N H4F2 H4FN HIST2H4 HIST2H4A; H4C15 H4/O H4FO HIST2H4B; H4-16 HIST4H4	Histone H4	14	28.7361	28.5906	29.3638	28.6795	28.7832	28.8306	29.0791	28.9059	29.3567	29.2504	28.8846	29.0953	TRUE	0.0583365	0.264711	1.2014			27.462	27.8269	27.9957	27.3072	27.0032	27.519	27.7977	27.3352	27.6893	27.2751	27.4187	27.5032	TRUE	0.932668	-0.0158428	0.989079
Q9Y5X3	SNX5	SNX5	Sorting nexin-5	6	21.2984	21.6625	20.8446	21.298	20.9562	21.212	21.2968	21.4679	21.379	21.7538	21.4792	21.4753	TRUE	0.15667	0.263387	1.20029			20.5387	20.2736	20.0666	20.2679	20.7554	20.3804	20.4934	20.9999	20.7005	20.2834	20.2814	20.5517	TRUE	0.488304	0.1713	1.12607
P50479	PDLIM4	PDLIM4 RIL	PDZ and LIM domain protein 4 (LIM protein RIL) (Reversion-induced LIM protein)	2	19.6515	19.8748	19.174	19.7877	20.3133	19.7602	19.4544	20.1786	20.1716	20.5969	19.7068	20.0217	TRUE	0.433564	0.261422	1.19866			18.349	19.9226	18.1916	17.8886	18.59	18.5883	18.4666	18.9218	19.4204	18.5893	18.7309	18.8258	TRUE	0.557044	0.237467	1.17892
Q99418	CYTH2	CYTH2 ARNO PSCD2 PSCD2L	Cytohesin-2 (ARF exchange factor) (ARF nucleotide-binding site opener) (Protein ARNO) (PH, SEC7 and coiled-coil domain-containing protein 2)	2	20.4422	18.6587	19.9577	19.7115	20.6123	19.8765	20.102	20.2231	19.9032	19.8898	20.5634	20.1363	TRUE	0.483035	0.259759	1.19728			19.4141	18.1328	19.2723	19.989	19.9678	19.3552	19.7521	18.8952	19.291	19.9714	19.4209	19.4661	TRUE	0.634722	0.110929	1.07992
Q96AB3	ISOC2	ISOC2	Isochorismatase domain-containing protein 2	3	23.0054	19.0978	19.9204	22.2903	22.4621	21.3552	18.8206	22.3808	21.7626	22.4402	22.6704	21.6149	TRUE	0.845954	0.25971	1.19724			21.1498	18.1303	21.2762	21.0562	21.4384	20.6102	21.076	20.9408	18.8632	21.1735	21.4219	20.6951	TRUE	0.92321	0.0849407	1.06064
P62857	RPS28	RPS28	40S ribosomal protein S28 (Small ribosomal subunit protein eS28)	3	21.8436	21.7938	21.9028	22.2315	21.9077	21.9359	21.8517	22.1185	22.4825	22.6242	21.8991	22.1952	TRUE	0.08513	0.259337	1.19693			20.5991	21.1499	21.1924	21.3514	20.8171	21.022	20.8802	20.6519	21.3434	21.1928	20.6969	20.953	TRUE	0.63691	-0.0689476	0.953333
Q9HBL0	TNS1	TNS1 TNS	Tensin-1	7	21.7312	20.5876	20.0566	21.5752	19.2724	20.6446	21.1901	21.3574	20.0533	22.0759	19.8385	20.9031	TRUE	0.336617	0.258451	1.19619			18.4245	20.378	18.6075	18.9931	17.9932	18.8793	19.6432	19.8326	19.6027	17.6293	19.975	19.3365	TRUE	0.497134	0.457275	1.37295
P11413	G6PD	G6PD	Glucose-6-phosphate 1-dehydrogenase (G6PD) (EC 1.1.1.49)	14	23.6534	23.2156	23.1594	22.9145	22.7166	23.1319	23.7899	23.4291	23.4005	23.1553	23.169	23.3888	TRUE	0.00807172	0.25686	1.19488			22.1872	22.6594	22.2888	21.4602	22.1634	22.1518	22.4918	22.6392	22.2711	21.4039	22.1739	22.196	TRUE	0.539726	0.0441719	1.03109
P54764	EPHA4	EPHA4 HEK8 SEK TYRO1	Ephrin type-A receptor 4 (EC 2.7.10.1) (EPH-like kinase 8) (EK8) (hEK8) (Tyrosine-protein kinase TYRO1) (Tyrosine-protein kinase receptor SEK)	11	22.1608	22.9755	21.7537	23.1452	23.4136	22.6898	22.5928	23.2362	22.7743	23.1297	22.9917	22.9449	TRUE	0.347047	0.255165	1.19347			21.9408	21.9954	21.4043	22.1532	22.0138	21.9015	21.9989	21.7899	21.444	21.7612	21.8727	21.7733	TRUE	0.198642	-0.128147	0.915006
P21291	CSRP1	CSRP1 CSRP CYRP	Cysteine and glycine-rich protein 1 (Cysteine-rich protein 1) (CRP) (CRP1) (Epididymis luminal protein 141) (HEL-141)	9	25.6098	25.4104	25.0872	25.2805	24.251	25.1278	26.1709	25.7021	25.2658	25.361	24.4022	25.3804	TRUE	0.0400652	0.252597	1.19135			25.0972	26.279	25.1449	24.0099	25.1376	25.1337	25.1348	26.1301	25.2069	24.8083	25.3344	25.3229	TRUE	0.307687	0.189162	1.1401
P33121	ACSL1	ACSL1 FACL1 FACL2 LACS LACS1 LACS2	Long-chain-fatty-acid--CoA ligase 1 (EC 6.2.1.3) (Acyl-CoA synthetase 1) (ACS1) (Arachidonate--CoA ligase) (EC 6.2.1.15) (Long-chain acyl-CoA synthetase 1) (LACS 1) (Long-chain acyl-CoA synthetase 2) (LACS 2) (Long-chain fatty acid-CoA ligase 2) (Palmitoyl-CoA ligase 1) (Palmitoyl-CoA ligase 2) (Phytanate--CoA ligase) (EC 6.2.1.24)	3	19.0602	19.74	19.499	20.0764	19.3878	19.5527	19.8456	20.0726	20.0908	19.9913	19.0197	19.804	TRUE	0.302782	0.251313	1.19029			18.7344	18.6255	18.4319	18.2646	16.8092	18.1731	19.4005	19.1333	18.574	18.3466	18.5796	18.8068	TRUE	0.105935	0.633684	1.55152
O95747	OXSR1	OXSR1 KIAA1101 OSR1	Serine/threonine-protein kinase OSR1 (EC 2.7.11.1) (Oxidative stress-responsive 1 protein)	3	20.7677	20.9617	19.2233	21.2202	19.3385	20.3023	20.7356	21.1008	20.8605	20.9793	19.087	20.5526	TRUE	0.51861	0.250363	1.18951			19.8341	19.7263	20.1314	19.8371	19.9368	19.8931	19.5857	19.6064	19.6343	19.8984	19.7141	19.6878	TRUE	0.0870423	-0.205334	0.867338
Q9HAV7	GRPEL1	GRPEL1 GREPEL1	GrpE protein homolog 1, mitochondrial (HMGE) (Mt-GrpE#1)	2	22.247	18.4491	20.5433	21.3691	18.9751	20.3167	21.2265	21.6597	21.8333	19.5949	18.5107	20.565	TRUE	0.795506	0.24829	1.1878			20.3835	18.408	20.7248	17.1463	20.5778	19.4481	18.2956	20.2795	19.2178	20.6552	20.4342	19.7765	TRUE	0.769505	0.328347	1.25557
Q96P70	IPO9	IPO9 IMP9 KIAA1192 RANBP9 HSPC273	Importin-9 (Imp9) (Ran-binding protein 9) (RanBP9)	2	18.5051	19.3836	18.6229	19.9428	19.8122	19.2533	19.1324	19.5311	19.3829	19.4454	20.0159	19.5015	TRUE	0.323522	0.248223	1.18774			18.6671	19.2678	17.9223	18.9523	18.675	18.6969	17.4842	18.9602	18.9034	19.0841	18.3025	18.5469	TRUE	0.693161	-0.150019	0.901239
P11047	LAMC1	LAMC1 LAMB2	Laminin subunit gamma-1 (Laminin B2 chain) (Laminin-1 subunit gamma) (Laminin-10 subunit gamma) (Laminin-11 subunit gamma) (Laminin-2 subunit gamma) (Laminin-3 subunit gamma) (Laminin-4 subunit gamma) (Laminin-6 subunit gamma) (Laminin-7 subunit gamma) (Laminin-8 subunit gamma) (Laminin-9 subunit gamma) (S-laminin subunit gamma) (S-LAM gamma)	11	23.1998	23.0559	23.0254	22.8746	22.6627	22.9637	23.2074	23.046	23.4261	23.8241	22.5541	23.2115	TRUE	0.274264	0.247867	1.18745			21.9909	22.3814	22.5224	21.9435	20.9217	21.952	21.8177	22.5038	21.1128	21.0113	22.0634	21.7018	TRUE	0.600913	-0.250174	0.840795
P07237	P4HB	P4HB ERBA2L PDI PDIA1 PO4DB	Protein disulfide-isomerase (PDI) (EC 5.3.4.1) (Cellular thyroid hormone-binding protein) (Prolyl 4-hydroxylase subunit beta) (p55)	13	23.2977	23.4347	23.4741	23.1386	23.5776	23.3845	23.7333	23.5657	23.8204	23.474	23.5595	23.6306	TRUE	0.0410167	0.246043	1.18595			22.8785	22.8926	22.9009	22.8146	22.5446	22.8062	22.9224	23.0808	23.0077	22.3901	22.4564	22.7715	TRUE	0.762418	-0.034761	0.976193
P36873	PPP1CC	PPP1CC	Serine/threonine-protein phosphatase PP1-gamma catalytic subunit (PP-1G) (EC 3.1.3.16) (Protein phosphatase 1C catalytic subunit)	11	21.4597	20.9329	20.9841	20.7035	21.1968	21.0554	20.9134	21.3176	21.3526	21.4986	21.4127	21.299	TRUE	0.329523	0.243557	1.18391			19.8535	18.1351	20.2769	20.3333	20.4268	19.8051	19.5733	20.197	20.1573	19.9873	20.5193	20.0869	TRUE	0.566382	0.281738	1.21566
O75382	TRIM3	TRIM3 BERP RNF22 RNF97	Tripartite motif-containing protein 3 (Brain-expressed RING finger protein) (RING finger protein 22) (RING finger protein 97)	7	21.6631	22.567	21.6785	22.1537	21.9611	22.0047	22.0532	22.338	22.3367	21.9736	22.5334	22.247	TRUE	0.266186	0.242294	1.18287			21.045	20.0658	21.125	21.3548	20.6176	20.8416	21.2607	20.8219	21.0116	21.5025	21.023	21.1239	TRUE	0.12281	0.282311	1.21614
Q9NYU2	UGGT1	UGGT1 GT UGCGL1 UGGT UGT1 UGTR	UDP-glucose:glycoprotein glucosyltransferase 1 (UGT1) (hUGT1) (EC 2.4.1.-) (UDP--Glc:glycoprotein glucosyltransferase) (UDP-glucose ceramide glucosyltransferase-like 1)	3	19.8112	19.0254	20.0811	18.8179	20.1625	19.5796	19.7982	20.0689	19.8099	20.0874	19.3442	19.8217	TRUE	0.574827	0.242113	1.18272			17.9804	18.84	18.9728	18.76	19.1801	18.7467	19.0778	18.6938	18.4566	19.4292	18.252	18.7819	TRUE	0.929556	0.035178	1.02468
Q9UHG2	PCSK1N	PCSK1N	ProSAAS (Proprotein convertase subtilisin/kexin type 1 inhibitor) (Proprotein convertase 1 inhibitor) (pro-SAAS) [Cleaved into: KEP; Big SAAS (b-SAAS); Little SAAS (l-SAAS) (N-proSAAS); Big PEN-LEN (b-PEN-LEN) (SAAS CT(1-49)); PEN; Little LEN (l-LEN); Big LEN (b-LEN) (SAAS CT(25-40))]	14	26.6878	26.8082	26.9249	27.1256	26.7216	26.8536	26.6129	27.0186	27.1624	27.5194	27.1649	27.0956	TRUE	0.0561362	0.242015	1.18264			24.7561	24.1664	25.1819	26.076	25.3661	25.1093	25.394	24.9807	25.3761	25.9902	25.3932	25.4268	TRUE	0.14358	0.317542	1.24621
Q00059	TFAM	TFAM TCF6 TCF6L2	Transcription factor A, mitochondrial (mtTFA) (Mitochondrial transcription factor 1) (MtTF1) (Transcription factor 6) (TCF-6) (Transcription factor 6-like 2)	5	23.2973	23.462	22.5146	23.7026	22.9634	23.188	23.3236	23.4109	23.4986	23.2881	23.6285	23.43	TRUE	0.395138	0.241978	1.18261			22.2436	21.8012	22.1198	22.4534	22.3318	22.19	21.6269	21.6601	22.1477	21.9001	21.8796	21.8429	TRUE	0.0492465	-0.347107	0.786159
Q15388	TOMM20	TOMM20 KIAA0016	Mitochondrial import receptor subunit TOM20 homolog (Mitochondrial 20 kDa outer membrane protein) (Outer mitochondrial membrane receptor Tom20)	3	21.7552	22.7607	21.4427	20.0211	19.2043	21.0368	22.1306	21.7272	21.7029	19.6278	21.2054	21.2788	TRUE	0.658197	0.241935	1.18258			21.0042	20.4491	20.9746	21.4828	21.0867	20.9995	20.5011	17.2873	18.9523	21.0933	17.9738	19.1616	TRUE	0.0382574	-1.83792	0.279725	TRUE
P63220	RPS21	RPS21	40S ribosomal protein S21 (Small ribosomal subunit protein eS21)	4	21.9628	22.0979	21.5936	22.5764	21.5222	21.9506	21.8221	22.7889	22.0844	22.7306	21.5302	22.1912	TRUE	0.192454	0.240664	1.18154			21.3596	20.541	20.8307	20.5638	21.0547	20.87	20.2878	20.285	20.8811	20.5016	20.4002	20.4711	TRUE	0.125743	-0.398827	0.758475
Q8TEA8	DTD1	DTD1 C20orf88 DUEB HARS2	D-aminoacyl-tRNA deacylase 1 (DTD) (EC 3.1.1.96) (DNA-unwinding element-binding protein B) (DUE-B) (Gly-tRNA(Ala) deacylase) (Histidyl-tRNA synthase-related)	2	22.3142	22.1335	21.4113	22.5313	21.8262	22.0433	22.1513	22.4448	22.2283	22.3364	22.2542	22.283	TRUE	0.276383	0.239735	1.18078			21.4151	18.7002	21.8462	21.6492	21.449	21.0119	21.8556	21.106	21.5392	21.6104	21.3879	21.4998	TRUE	0.379696	0.487897	1.4024
Q9BXW6	OSBPL1A	OSBPL1A ORP1 OSBP8 OSBPL1 OSBPL1B	Oxysterol-binding protein-related protein 1 (ORP-1) (OSBP-related protein 1)	2	19.6917	19.1193	19.4901	20.1306	19.7583	19.638	19.7932	20.0469	19.4063	20.1262	20.015	19.8775	TRUE	0.25689	0.239465	1.18055			17.5423	19.045	17.7546	19.4679	18.3342	18.4288	18.6109	19.3629	18.1029	19.8689	19.1506	19.0193		0.0169213	0.590448	1.50571
P29401	TKT	TKT	Transketolase (TK) (EC 2.2.1.1)	24	26.6486	26.5818	26.6895	26.7121	26.5731	26.641	27.0148	26.7797	27.1797	26.5933	26.8301	26.8795	TRUE	0.0801172	0.238509	1.17977			26.0377	26.3302	25.9784	25.9306	25.974	26.0502	26.361	26.5711	26.1341	26.2461	26.1507	26.2926	TRUE	0.00214712	0.2424	1.18296
Q13011	ECH1	ECH1	Delta(3,5)-Delta(2,4)-dienoyl-CoA isomerase, mitochondrial (EC 5.3.3.-)	8	23.8245	23.673	22.9219	23.7426	23.3943	23.5113	23.8765	23.895	23.672	23.7524	23.5509	23.7493	TRUE	0.14886	0.238063	1.17941			22.6213	23.1057	22.1265	22.267	22.7659	22.5773	23.1858	22.6299	22.5701	22.3209	22.6999	22.6813	TRUE	0.606489	0.104053	1.07479
Q96HE7	ERO1A	ERO1A ERO1L UNQ434/PRO865	ERO1-like protein alpha (ERO1-L) (ERO1-L-alpha) (EC 1.8.4.-) (Endoplasmic oxidoreductin-1-like protein) (Endoplasmic reticulum oxidoreductase alpha) (Oxidoreductin-1-L-alpha)	3	19.3531	18.9116	20.9762	19.6379	20.4378	19.8633	20.971	19.6453	19.5192	20.2595	20.1059	20.1002		0.674773	0.236861	1.17843			19.0133	19.698	17.7716	20.4592	19.9901	19.3864	18.0135	19.5666	19.8093	20.0971	17.3541	18.9681	TRUE	0.608616	-0.41835	0.74828
Q6F5E8	CARMIL2	CARMIL2 LRRC16C RLTPR	Capping protein, Arp2/3 and myosin-I linker protein 2 (Capping protein regulator and myosin 1 linker 2) (F-actin-uncapping protein RLTPR) (Leucine-rich repeat-containing protein 16C) (RGD, leucine-rich repeat, tropomodulin and proline-rich-containing protein)	4	21.8791	22.9968	20.261	22.2837	22.9462	22.0734	21.5505	22.5421	22.2189	22.4366	22.7977	22.3092	TRUE	0.622342	0.235781	1.17754			21.7864	21.4361	21.1407	21.5705	21.8481	21.5564	21.3327	20.5208	21.3152	21.0752	21.1642	21.0816	TRUE	0.0592365	-0.474745	0.719594
P30084	ECHS1	ECHS1	Enoyl-CoA hydratase, mitochondrial (EC 4.2.1.17) (Enoyl-CoA hydratase 1) (Short-chain enoyl-CoA hydratase) (SCEH)	12	24.6527	24.4065	24.2878	24.3582	25.1868	24.5784	24.4608	24.9357	25.0472	24.7804	24.8378	24.8124	TRUE	0.336575	0.233987	1.17608			24.0957	24.1208	23.7452	24.0949	24.1544	24.0422	23.874	23.8909	23.862	24.1436	23.966	23.9473	TRUE	0.267058	-0.0948986	0.936338
Q9P2R3	ANKFY1	ANKFY1 ANKHZN KIAA1255	Rabankyrin-5 (Rank-5) (Ankyrin repeat and FYVE domain-containing protein 1) (Ankyrin repeats hooked to a zinc finger motif)	9	21.421	20.8993	22.0761	21.6231	21.1949	21.4429	21.5261	21.9928	21.848	22.6993	20.3114	21.6755	TRUE	0.575928	0.232651	1.17499			20.6261	21.5791	20.319	20.3549	20.5384	20.6835	20.9306	21.4238	20.4734	21.2333	20.7816	20.9685	TRUE	0.165242	0.285028	1.21843
O95573	ACSL3	ACSL3 ACS3 FACL3 LACS3	Long-chain-fatty-acid--CoA ligase 3 (EC 6.2.1.3) (Arachidonate--CoA ligase) (EC 6.2.1.15) (Long-chain acyl-CoA synthetase 3) (LACS 3)	5	21.1139	21.0513	19.6312	20.9311	21.0455	20.7546	20.9131	21.0144	20.8184	20.9319	21.256	20.9868	TRUE	0.401438	0.232186	1.17461			20.5087	20.6941	21.0367	20.7784	20.2298	20.6496	20.2983	20.5906	20.1577	20.1998	20.0007	20.2494	TRUE	0.0498282	-0.400143	0.757783
O60493	SNX3	SNX3	Sorting nexin-3 (Protein SDP3)	9	23.6463	24.2466	23.6092	24.3474	23.6246	23.8948	23.865	24.349	24.2932	24.3252	23.7908	24.1247	TRUE	0.129015	0.229855	1.17272			23.0367	22.7679	22.9772	23.3584	23.0924	23.0465	22.5605	22.6419	23.0189	22.9618	22.647	22.766	TRUE	0.0508804	-0.280491	0.823311
Q9UHD8	SEPTIN9	SEPTIN9 KIAA0991 MSF SEPT9	Septin-9 (MLL septin-like fusion protein MSF-A) (MLL septin-like fusion protein) (Ovarian/Breast septin) (Ov/Br septin) (Septin D1)	18	24.728	25.1395	24.128	24.6009	24.2945	24.5782	25.1505	24.7608	24.7182	24.9099	24.5005	24.808	TRUE	0.235985	0.229812	1.17268			23.9037	23.8053	24.3445	24.1219	24.2299	24.0811	24.0333	24.0292	24.2229	24.2207	24.2335	24.1479	TRUE	0.319019	0.0668526	1.04743
P20591	MX1	MX1	Interferon-induced GTP-binding protein Mx1 (Interferon-induced protein p78) (IFI-78K) (Interferon-regulated resistance GTP-binding protein MxA) (Myxoma resistance protein 1) (Myxovirus resistance protein 1) [Cleaved into: Interferon-induced GTP-binding protein Mx1, N-terminally processed]	8	21.5532	19.8482	22.9519	20.3851	19.5741	20.8625	21.6844	19.5577	22.8289	21.7377	19.6438	21.0905	TRUE	0.47684	0.227988	1.1712			17.8064	18.3152	18.5055	18.2958	17.543	18.0932	19.5373	18.3815	18.4527	17.8761	17.5295	18.3554		0.524516	0.262238	1.19934
Q13247	SRSF6	SRSF6 SFRS6 SRP55	Serine/arginine-rich splicing factor 6 (Pre-mRNA-splicing factor SRP55) (Splicing factor, arginine/serine-rich 6)	3	21.716	21.7396	18.0007	22.2442	21.4395	21.028	21.4867	21.7426	22.0812	19.5169	21.4501	21.2555	TRUE	0.845258	0.227495	1.1708			20.2396	18.6841	21.5161	21.411	19.5338	20.2769	18.0593	19.8235	18.2484	20.196	20.0747	19.2804	TRUE	0.292402	-0.996529	0.501205
P78417	GSTO1	GSTO1 GSTTLP28	Glutathione S-transferase omega-1 (GSTO-1) (EC 2.5.1.18) (Glutathione S-transferase omega 1-1) (GSTO 1-1) (Glutathione-dependent dehydroascorbate reductase) (EC 1.8.5.1) (Monomethylarsonic acid reductase) (MMA(V) reductase) (EC 1.20.4.2) (S-(Phenacyl)glutathione reductase) (SPG-R)	6	23.3226	22.6522	23.775	21.9697	24.2108	23.1861	23.4468	23.5259	23.0879	22.2964	24.7106	23.4135	TRUE	0.430551	0.22744	1.17076			23.6244	23.2568	23.6658	22.9003	23.5616	23.4018	23.2862	23.0565	23.7264	22.6609	23.2687	23.1997	TRUE	0.0441967	-0.202046	0.869317
P34897	SHMT2	SHMT2	Serine hydroxymethyltransferase, mitochondrial (SHMT) (EC 2.1.2.1) (Glycine hydroxymethyltransferase) (Serine methylase)	10	22.8652	23.1346	22.9975	23.5112	22.8362	23.069	23.1503	22.9352	23.5938	23.6535	23.1421	23.295	TRUE	0.155671	0.226022	1.16961			21.8676	22.2663	21.2347	21.3667	21.7692	21.7009	21.5324	21.7667	21.5484	21.1787	21.5864	21.5225	TRUE	0.259909	-0.178382	0.883693
Q16778	HIST2H2BE	HIST2H2BE H2BFQ	Histone H2B type 2-E (Histone H2B-GL105) (Histone H2B.q) (H2B/q)	7	27.4537	27.7702	27.4328	27.4547	27.2078	27.4639	27.8387	27.5658	27.4682	28.0108	27.5587	27.6885	TRUE	0.174665	0.224594	1.16845			27.2584	26.9842	27.4179	26.1788	26.0502	26.7779	27.1731	26.7257	27.0129	26.4738	26.6206	26.8012	TRUE	0.903238	0.0233006	1.01628
Q8NEV1	CSNK2A3	CSNK2A3 CSNK2A1P	Casein kinase II subunit alpha 3 (CK II alpha 3) (EC 2.7.11.1) (Casein kinase II alpha 1 polypeptide pseudogene)	7	22.8393	22.1602	22.4557	22.5097	22.4178	22.4765	23.1005	22.6221	22.3282	22.7495	22.7043	22.7009	TRUE	0.0803664	0.224398	1.16829			21.3079	21.6149	21.5027	21.7538	21.9665	21.6292	21.4927	21.606	21.4003	21.7719	21.9022	21.6346	TRUE	0.917372	0.00546989	1.0038
Q02252	ALDH6A1	ALDH6A1 MMSDH	Methylmalonate-semialdehyde dehydrogenase [acylating], mitochondrial (MMSDH) (Malonate-semialdehyde dehydrogenase [acylating]) (EC 1.2.1.18) (EC 1.2.1.27) (Aldehyde dehydrogenase family 6 member A1)	23	26.5393	26.3631	25.75	26.6266	25.885	26.2328	26.7272	26.5527	26.1572	26.6592	26.1863	26.4565	TRUE	0.0234266	0.223695	1.16772			25.2516	25.6514	25.4955	25.286	25.8479	25.5065	25.2503	25.9197	25.8367	25.6783	25.9855	25.7341	TRUE	0.0333997	0.227626	1.17091
Q96QK1	VPS35	VPS35 MEM3 TCCCTA00141	Vacuolar protein sorting-associated protein 35 (hVPS35) (Maternal-embryonic 3) (Vesicle protein sorting 35)	19	25.7455	25.9161	25.327	25.8382	25.6001	25.6854	25.8019	26.0009	26.0316	26.0364	25.6678	25.9077	TRUE	0.14543	0.222319	1.16661			24.5737	24.4852	24.2555	24.4475	24.5246	24.4573	24.7288	24.627	24.5853	24.3496	24.8124	24.6206	TRUE	0.0944362	0.163322	1.11986
O95394	PGM3	PGM3 AGM1	Phosphoacetylglucosamine mutase (PAGM) (EC 5.4.2.3) (Acetylglucosamine phosphomutase) (N-acetylglucosamine-phosphate mutase) (Phosphoglucomutase-3) (PGM 3)	4	18.6737	18.7443	20.2195	19.7715	20.3023	19.5422	18.5007	19.6091	19.781	18.8828	22.0474	19.7642		0.666176	0.221968	1.16632			20.7666	21.2357	21.3838	20.8517	20.9758	21.0427	21.1351	21.4097	21.4627	20.7435	18.0968	20.5695	TRUE	0.478757	-0.47319	0.72037
P11766	ADH5	ADH5 ADHX FDH	Alcohol dehydrogenase class-3 (EC 1.1.1.1) (Alcohol dehydrogenase 5) (Alcohol dehydrogenase class chi chain) (Alcohol dehydrogenase class-III) (Glutathione-dependent formaldehyde dehydrogenase) (FALDH) (FDH) (GSH-FDH) (EC 1.1.1.-) (S-(hydroxymethyl)glutathione dehydrogenase) (EC 1.1.1.284)	10	22.8142	21.8498	21.3896	21.9751	22.4846	22.1027	23.1523	22.1509	21.8365	22.0401	22.4418	22.3243	TRUE	0.071189	0.22168	1.16609			22.5811	23.1875	22.551	22.1039	22.1412	22.5129	22.3877	23.0222	22.445	21.9632	22.5709	22.4778	TRUE	0.779241	-0.0351109	0.975957
Q16288	NTRK3	NTRK3 TRKC	NT-3 growth factor receptor (EC 2.7.10.1) (GP145-TrkC) (Trk-C) (Neurotrophic tyrosine kinase receptor type 3) (TrkC tyrosine kinase)	4	21.4927	22.2649	19.261	21.7389	21.5238	21.2563	21.1023	21.8276	21.5782	21.3886	21.4881	21.477	TRUE	0.697862	0.220704	1.1653			20.7718	20.5305	19.0268	20.6683	21.092	20.4179	20.2884	20.2617	20.1309	20.4997	20.3654	20.3092	TRUE	0.749737	-0.10867	0.927443
O94760	DDAH1	DDAH1 DDAH	N(G),N(G)-dimethylarginine dimethylaminohydrolase 1 (DDAH-1) (Dimethylarginine dimethylaminohydrolase 1) (EC 3.5.3.18) (DDAHI) (Dimethylargininase-1)	20	27.1385	27.033	26.076	26.8038	27.3217	26.8746	27.2532	27.0729	26.7823	26.9742	27.3913	27.0948	TRUE	0.149162	0.220211	1.1649			26.6651	26.9466	26.7599	26.5286	26.6594	26.7119	26.9526	26.8894	26.9772	26.4818	26.6475	26.7897	TRUE	0.343958	0.0777863	1.0554
Q13526	PIN1	PIN1	Peptidyl-prolyl cis-trans isomerase NIMA-interacting 1 (EC 5.2.1.8) (Peptidyl-prolyl cis-trans isomerase Pin1) (PPIase Pin1) (Rotamase Pin1)	8	25.4816	25.5228	24.7085	25.3305	25.3347	25.2756	25.2725	25.621	25.6812	25.5842	25.3201	25.4958	TRUE	0.338487	0.220153	1.16486			23.9484	23.8902	23.6135	24.5553	24.2101	24.0435	24.2169	23.904	23.9293	24.0728	23.7422	23.973	TRUE	0.704747	-0.0704548	0.952338
P30041	PRDX6	PRDX6 AOP2 KIAA0106	Peroxiredoxin-6 (EC 1.11.1.15) (1-Cys peroxiredoxin) (1-Cys PRX) (24 kDa protein) (Acidic calcium-independent phospholipase A2) (aiPLA2) (EC 3.1.1.4) (Antioxidant protein 2) (Liver 2D page spot 40) (Non-selenium glutathione peroxidase) (NSGPx) (Red blood cells page spot 12)	19	26.2191	26.1129	26.0361	25.4688	26.2682	26.021	26.685	26.2986	25.7834	26.1801	26.2535	26.2401	TRUE	0.268143	0.219113	1.16402			25.8127	27.1092	25.6182	24.4134	25.8564	25.762	26.2071	27.1441	25.7919	25.0484	25.7715	25.9926	TRUE	0.147675	0.230624	1.17334
P27824	CANX	CANX	Calnexin (IP90) (Major histocompatibility complex class I antigen-binding protein p88) (p90)	13	24.984	24.9908	24.8153	25.1517	24.4528	24.8789	24.9878	25.1371	25.2276	25.2417	24.882	25.0952	TRUE	0.0667676	0.216311	1.16176			23.5115	23.9681	23.6557	23.1738	23.8452	23.6308	23.4532	24.0093	23.8638	23.4078	23.4207	23.631	TRUE	0.999089	0.000144577	1.0001
Q92973	TNPO1	TNPO1 KPNB2 MIP1 TRN	Transportin-1 (Importin beta-2) (Karyopherin beta-2) (M9 region interaction protein) (MIP)	6	22.0863	21.4467	21.5206	21.6687	21.3114	21.6067	21.817	21.7888	22.0868	21.8432	21.5784	21.8229	TRUE	0.191272	0.216113	1.1616			20.3676	20.9074	20.6869	20.6543	20.5683	20.6369	20.6878	20.7799	20.643	20.697	20.6603	20.6936	TRUE	0.496079	0.0566994	1.04008
Q5T848	GPR158	GPR158 KIAA1136	Probable G-protein coupled receptor 158	3	19.3545	20.5371	20.924	18.5682	18.5224	19.5813	18.9947	19.7702	19.3786	20.8103	20.0315	19.7971		0.777324	0.215815	1.16136			19.9784	17.5977	17.9027	20.3599	20.0503	19.1778	19.5449	18.1447	20.5687	20.0558	20.0228	19.6674	TRUE	0.438559	0.489556	1.40401
P54727	RAD23B	RAD23B	UV excision repair protein RAD23 homolog B (HR23B) (hHR23B) (XP-C repair-complementing complex 58 kDa protein) (p58)	9	24.6977	25.2076	24.4285	24.7371	24.9905	24.8123	24.6024	25.0073	25.4602	24.9123	25.1573	25.0279	TRUE	0.376186	0.215601	1.16119			23.7297	23.0983	23.5112	23.6391	23.6083	23.5173	23.8111	23.4345	23.778	23.068	23.4723	23.5128	TRUE	0.979193	-0.00453949	0.996858
Q13409	DYNC1I2	DYNC1I2 DNCI2 DNCIC2	Cytoplasmic dynein 1 intermediate chain 2 (Cytoplasmic dynein intermediate chain 2) (Dynein intermediate chain 2, cytosolic) (DH IC-2)	8	22.9227	23.0309	22.5437	23.1479	22.6534	22.8597	23.0401	22.9331	23.5598	23.2219	22.6169	23.0744	TRUE	0.352096	0.214626	1.1604			21.772	21.996	22.0359	21.6781	22.061	21.9086	21.828	21.6553	22.2673	21.3429	21.4058	21.6999	TRUE	0.255855	-0.208727	0.8653
Q8NBS9	TXNDC5	TXNDC5 TLP46 UNQ364/PRO700	Thioredoxin domain-containing protein 5 (Endoplasmic reticulum resident protein 46) (ER protein 46) (ERp46) (Thioredoxin-like protein p46)	3	20.1711	19.5184	19.7276	19.5495	19.5834	19.71	19.7959	19.5403	20.2423	20.4695	19.5711	19.9238	TRUE	0.39823	0.21382	1.15975			17.8978	17.1427	18.0701	19.0195	18.0057	18.0272	18.7849	18.5939	18.9768	19.1619	18.4375	18.791		0.0270675	0.763837	1.698
Q93077	HIST1H2AC	HIST1H2AC H2AFL	Histone H2A type 1-C (Histone H2A/l)	6	28.7437	28.3177	29.4217	28.5649	27.9408	28.5978	28.7573	28.8175	28.7074	29.1976	28.576	28.8111	TRUE	0.455446	0.213387	1.15941			27.1081	27.6594	28.0457	27.1275	26.7925	27.3466	27.7345	27.7329	27.7783	27.4407	27.5145	27.6402	TRUE	0.180833	0.293551	1.22565
P33316	DUT	DUT	Deoxyuridine 5'-triphosphate nucleotidohydrolase, mitochondrial (dUTPase) (EC 3.6.1.23) (dUTP pyrophosphatase)	6	21.6677	21.1659	21.4591	19.3177	21.5175	21.0256	21.0057	21.9925	21.365	21.5793	20.2485	21.2382	TRUE	0.747995	0.212621	1.15879			20.704	20.365	20.7978	20.9619	20.6901	20.7038	20.8734	18.5483	20.875	20.3546	17.5888	19.648	TRUE	0.165098	-1.05576	0.481043
P23468	PTPRD	PTPRD	Receptor-type tyrosine-protein phosphatase delta (Protein-tyrosine phosphatase delta) (R-PTP-delta) (EC 3.1.3.48)	14	23.1617	23.9266	23.2332	23.9657	23.9767	23.6528	23.3503	23.7523	24.0332	24.0675	24.1233	23.8653	TRUE	0.254766	0.212539	1.15873			22.6884	21.9572	22.6831	22.5386	22.515	22.4765	22.3692	22.212	23.0277	22.4036	22.0746	22.4174	TRUE	0.722627	-0.0590298	0.959909
Q14203	DCTN1	DCTN1	Dynactin subunit 1 (150 kDa dynein-associated polypeptide) (DAP-150) (DP-150) (p135) (p150-glued)	36	25.8856	26.2971	25.3452	25.8376	25.52	25.7771	25.9316	26.1021	26.0124	26.1196	25.7737	25.9879	TRUE	0.213647	0.210782	1.15732			24.7233	24.5665	24.6701	24.9683	24.8287	24.7514	24.7397	24.8499	24.8721	24.9426	24.7259	24.826	TRUE	0.360328	0.0746849	1.05313
Q86SX6	GLRX5	GLRX5 C14orf87	Glutaredoxin-related protein 5, mitochondrial (Monothiol glutaredoxin-5)	2	20.4822	20.1402	19.8476	20.8605	19.6704	20.2002	20.8213	19.9632	20.9964	20.1417	20.1294	20.4104	TRUE	0.539866	0.210239	1.15688			19.3149	19.5819	19.0081	17.2084	17.7101	18.5647	20.1201	18.7745	18.0293	18.6333	18.4733	18.8061		0.640416	0.241428	1.18216
P53004	BLVRA	BLVRA BLVR BVR	Biliverdin reductase A (BVR A) (EC 1.3.1.24) (Biliverdin-IX alpha-reductase)	7	22.575	20.878	21.2058	21.8577	22.5939	21.8221	22.1885	22.1344	21.8394	21.87	22.1259	22.0316	TRUE	0.555645	0.209563	1.15634			21.5595	21.5373	21.8567	21.4227	21.7404	21.6233	21.2591	21.67	21.6469	21.6268	21.7477	21.5901	TRUE	0.748994	-0.0332401	0.977223
Q12904	AIMP1	AIMP1 EMAP2 SCYE1	Aminoacyl tRNA synthase complex-interacting multifunctional protein 1 (Multisynthase complex auxiliary component p43) [Cleaved into: Endothelial monocyte-activating polypeptide 2 (EMAP-2) (Endothelial monocyte-activating polypeptide II) (EMAP-II) (Small inducible cytokine subfamily E member 1)]	3	19.7412	20.3097	19.9627	18.7315	19.9993	19.7489	19.499	21.0064	20.7774	19.1294	19.3778	19.958		0.492173	0.209115	1.15598			18.7906	20.2087	17.6298	17.7586	18.9448	18.6665	18.9334	17.9077	19.0613	19.4293	19.414	18.9491	TRUE	0.709477	0.282634	1.21641
Q10567	AP1B1	AP1B1 ADTB1 BAM22 CLAPB2	AP-1 complex subunit beta-1 (Adaptor protein complex AP-1 subunit beta-1) (Adaptor-related protein complex 1 subunit beta-1) (Beta-1-adaptin) (Beta-adaptin 1) (Clathrin assembly protein complex 1 beta large chain) (Golgi adaptor HA1/AP1 adaptin beta subunit)	26	22.7013	23.3894	22.8782	22.986	23.0897	23.0089	23.056	23.1365	23.4108	22.6025	23.8811	23.2174	TRUE	0.410189	0.208465	1.15546			21.6775	21.1413	21.5309	21.8087	21.1837	21.4684	21.5734	21.3542	21.3888	21.5413	21.3957	21.4507	TRUE	0.864846	-0.0177422	0.987777
P62495	ETF1	ETF1 ERF1 RF1 SUP45L1	Eukaryotic peptide chain release factor subunit 1 (Eukaryotic release factor 1) (eRF1) (Protein Cl1) (TB3-1)	2	19.8165	20.0294	20.1524	19.6619	20.0709	19.9462	20.1587	20.0181	20.5637	20.3194	19.7114	20.1542	TRUE	0.306696	0.208034	1.15511			18.0881	18.0608	19.3153	19.2239	18.5141	18.6404	19.237	19.4413	18.6971	19.9697	19.346	19.3382	TRUE	0.115431	0.697767	1.62199
P30086	PEBP1	PEBP1 PBP PEBP	Phosphatidylethanolamine-binding protein 1 (PEBP-1) (HCNPpp) (Neuropolypeptide h3) (Prostatic-binding protein) (Raf kinase inhibitor protein) (RKIP) [Cleaved into: Hippocampal cholinergic neurostimulating peptide (HCNP)]	15	27.9595	27.4262	27.2662	27.6531	28.1137	27.6838	28.172	27.9075	27.7809	27.635	27.9477	27.8886	TRUE	0.201372	0.204845	1.15256			27.4856	27.8155	27.1613	27.1663	27.3656	27.3989	27.5244	27.7346	27.4152	27.3212	27.4533	27.4898	TRUE	0.18045	0.0908718	1.06501
Q99436	PSMB7	PSMB7 Z	Proteasome subunit beta type-7 (EC 3.4.25.1) (Macropain chain Z) (Multicatalytic endopeptidase complex chain Z) (Proteasome subunit Z)	2	19.1307	19.6625	19.754	19.02	22.0001	19.9135	20.5531	19.1168	19.271	19.5631	22.0831	20.1174		0.605061	0.203942	1.15184			20.967	19.0912	18.4999	18.3818	17.6207	18.9121	21.0748	20.7261	20.9058	17.9598	17.7204	19.6774	TRUE	0.226113	0.76525	1.69966
P21579	SYT1	SYT1 SVP65 SYT	Synaptotagmin-1 (Synaptotagmin I) (SytI) (p65)	14	25.6417	25.6318	25.0029	25.5731	26.2784	25.6256	25.6874	25.7386	25.48	25.7228	26.517	25.8292	TRUE	0.053803	0.203573	1.15155			25.1219	24.9722	24.9471	25.2371	24.8901	25.0337	25.4559	25.0705	24.9831	25.2176	25.0852	25.1625	TRUE	0.108213	0.128776	1.09337
Q92673	SORL1	SORL1 C11orf32	Sortilin-related receptor (Low-density lipoprotein receptor relative with 11 ligand-binding repeats) (LDLR relative with 11 ligand-binding repeats) (LR11) (SorLA-1) (Sorting protein-related receptor containing LDLR class A repeats) (SorLA)	4	19.9654	20.0384	20.1592	20.1915	20.507	20.1723	20.5161	20.5304	19.025	20.538	21.2642	20.3747	TRUE	0.584234	0.202455	1.15065			18.0698	17.6632	18.3382	18.3771	16.7622	17.8421	18.6613	18.8603	17.715	17.7319	19.3903	18.4718		0.362313	0.62965	1.54719
P05060	CHGB	CHGB SCG1	Secretogranin-1 (Chromogranin-B) (CgB) (Secretogranin I) (SgI) [Cleaved into: PE-11; GAWK peptide; CCB peptide]	16	23.6791	23.8065	23.0954	25.3174	22.8005	23.7398	24.0559	23.6814	24.1972	25.4985	22.2732	23.9412	TRUE	0.49994	0.201482	1.14988			22.3245	22.8219	21.2572	20.95	22.279	21.9265	22.2515	22.5407	21.0455	21.4168	22.0095	21.8528	TRUE	0.626626	-0.073716	0.950187
P0DN79	CBSL	CBSL	Cystathionine beta-synthase-like protein (EC 4.2.1.22) (Beta-thionase) (Serine sulfhydrase)	4	22.0561	23.0803	22.4697	22.1902	22.817	22.5227	22.0797	22.6883	22.5026	23.5207	22.8289	22.724	TRUE	0.530378	0.201371	1.14979			21.445	21.7669	21.0697	20.269	21.0847	21.1271	20.8814	21.3632	18.5763	20.2783	20.5404	20.3279	TRUE	0.14071	-0.799147	0.574689
P42167	TMPO	TMPO LAP2	Lamina-associated polypeptide 2, isoforms beta/gamma (Thymopoietin, isoforms beta/gamma) (TP beta/gamma) (Thymopoietin-related peptide isoforms beta/gamma) (TPRP isoforms beta/gamma) [Cleaved into: Thymopoietin (TP) (Splenin); Thymopentin (TP5)]	3	21.9419	21.9717	18.7478	21.8281	21.3054	21.159	21.9704	21.7018	21.793	21.8949	19.4363	21.3593	TRUE	0.813507	0.200315	1.14895			19.4218	20.3225	22.0093	17.8956	20.4815	20.0261	20.7141	20.2545	21.7782	21.3098	21.4594	21.1032	TRUE	0.174647	1.07709	2.10978
P0DMV9	HSPA1B	HSPA1B HSP72	Heat shock 70 kDa protein 1B (Heat shock 70 kDa protein 2) (HSP70-2) (HSP70.2)	34	28.8025	27.6686	28.3296	28.1273	28.9088	28.3674	29.2302	28.1022	28.339	28.3352	28.8253	28.5664	TRUE	0.132705	0.198988	1.14789			27.8595	27.9347	27.6422	27.2084	27.772	27.6834	28.1768	27.9189	27.8049	27.3147	27.8077	27.8046	TRUE	0.103402	0.121236	1.08767
P22033	MMUT	MMUT MUT	Methylmalonyl-CoA mutase, mitochondrial (MCM) (EC 5.4.99.2) (Methylmalonyl-CoA isomerase)	6	19.2	20.547	19.9323	21.1816	21.6476	20.5017	20.8193	20.8051	20.6524	20.3691	20.8552	20.7002	TRUE	0.690543	0.198514	1.14752			20.2585	20.2212	19.9106	19.5952	20.068	20.0107	20.1306	20.161	20.4883	19.9188	20.4758	20.2349	TRUE	0.176128	0.224215	1.16814
O43678	NDUFA2	NDUFA2	NADH dehydrogenase [ubiquinone] 1 alpha subcomplex subunit 2 (Complex I-B8) (CI-B8) (NADH-ubiquinone oxidoreductase B8 subunit)	5	23.571	23.568	22.9931	24.2455	23.6675	23.609	23.7033	23.8698	23.6813	24.0056	23.7744	23.8069	TRUE	0.259945	0.197885	1.14702			23.1431	23.1117	23.0649	23.6702	23.054	23.2088	22.986	22.6702	23.0603	23.327	22.8186	22.9724	TRUE	0.0349347	-0.236333	0.8489
Q9NWS8	RMND1	RMND1 C6orf96	Required for meiotic nuclear division protein 1 homolog	3	22.131	21.4741	20.2782	18.9451	22.1268	20.991	21.7973	21.2985	19.511	21.5267	21.8105	21.1888	TRUE	0.759799	0.19778	1.14693			20.8995	20.6518	21.1003	20.5557	20.6869	20.7788	19.8815	20.3608	20.4918	20.8438	20.4387	20.4033	TRUE	0.156696	-0.375525	0.770825
P35270	SPR	SPR	Sepiapterin reductase (SPR) (EC 1.1.1.153)	2	21.1335	21.0552	19.3893	20.9281	21.5875	20.8187	20.9882	20.8484	20.7469	21.2367	21.2621	21.0165	TRUE	0.557315	0.197735	1.1469			19.2816	19.824	19.0647	19.4702	19.9146	19.511	19.6313	19.7279	20.226	19.9259	19.8343	19.8691	TRUE	0.193729	0.358041	1.28168
Q8IVD9	NUDCD3	NUDCD3 KIAA1068	NudC domain-containing protein 3	7	21.5336	21.5013	21.3657	21.5448	21.4223	21.4735	21.615	21.8022	21.6121	21.7386	21.586	21.6708	TRUE	0.00609343	0.197227	1.14649			19.0944	19.6365	20.4883	20.1863	20.3179	19.9447	19.9285	19.7271	20.0167	18.1665	21.2982	19.8274	TRUE	0.839562	-0.117293	0.921916
P21399	ACO1	ACO1 IREB1	Cytoplasmic aconitate hydratase (Aconitase) (EC 4.2.1.3) (Citrate hydro-lyase) (Ferritin repressor protein) (Iron regulatory protein 1) (IRP1) (Iron-responsive element-binding protein 1) (IRE-BP 1)	7	21.4409	18.9454	20.9278	21.4574	19.1933	20.393	21.5931	21.3164	20.6054	18.768	20.6626	20.5891	TRUE	0.831635	0.196149	1.14564			20.7776	21.3101	21.2702	19.5268	21.161	20.8092	20.9721	21.4634	20.9776	20.1903	21.0442	20.9295	TRUE	0.500011	0.120377	1.08702
P05091	ALDH2	ALDH2 ALDM	Aldehyde dehydrogenase, mitochondrial (EC 1.2.1.3) (ALDH class 2) (ALDH-E2) (ALDHI)	28	27.4022	27.674	27.0263	27.6622	27.0339	27.3597	27.424	27.6214	27.7141	27.8808	27.1348	27.555	TRUE	0.210502	0.195271	1.14494			26.3176	26.6403	26.3221	26.2309	26.6404	26.4303	26.5729	26.7806	26.5544	26.6281	26.7993	26.6671	TRUE	0.00651977	0.236805	1.17838
P07910	HNRNPC	HNRNPC HNRPC	Heterogeneous nuclear ribonucleoproteins C1/C2 (hnRNP C1/C2)	7	23.0277	22.628	22.7772	22.7758	22.4584	22.7334	22.9158	23.2213	22.9019	23.438	22.166	22.9286	TRUE	0.359876	0.195163	1.14485			21.7916	21.9861	22.5724	22.6024	21.8778	22.1661	21.3732	21.4676	22.123	22.1396	22.078	21.8363	TRUE	0.0688785	-0.329803	0.795645
P61006	RAB8A	RAB8A MEL RAB8	Ras-related protein Rab-8A (Oncogene c-mel)	4	20.9724	19.3478	20.8575	19.4071	21.0706	20.3311	21.1541	21.0645	19.9791	21.1304	19.2998	20.5256	TRUE	0.793527	0.194511	1.14434			19.9671	20.6027	19.8515	20.2129	20.8238	20.2916	18.5222	19.9995	17.8963	19.9089	20.5922	19.3838	TRUE	0.0554078	-0.907783	0.533004
Q71UI9	H2AFV	H2AFV H2AV	Histone H2A.V (H2A.F/Z)	4	22.5041	22.7779	23.3574	22.9991	22.3998	22.8077	23.0961	22.7113	23.4514	23.01	22.7276	22.9993	TRUE	0.185456	0.1916	1.14203			22.1103	22.0389	22.5872	21.6031	21.5996	21.9878	22.0349	21.6064	22.4013	21.3842	21.7234	21.8301	TRUE	0.158473	-0.157753	0.89642
Q9Y570	PPME1	PPME1 PME1 PP2593 PRO0750	Protein phosphatase methylesterase 1 (PME-1) (EC 3.1.1.89)	7	21.816	20.6096	21.69	21.1159	22.1263	21.4716	21.6288	21.5189	21.6358	21.6039	21.9284	21.6631	TRUE	0.430928	0.191584	1.14202			20.9373	20.9799	20.7634	20.7492	21.0434	20.8946	20.786	20.8641	20.551	20.8564	21.1545	20.8424	TRUE	0.483232	-0.0522308	0.964444
Q7L5N1	COPS6	COPS6 CSN6 HVIP	COP9 signalosome complex subunit 6 (SGN6) (Signalosome subunit 6) (JAB1-containing signalosome subunit 6) (MOV34 homolog) (Vpr-interacting protein) (hVIP)	4	21.8287	21.6265	22.1443	21.7377	22.0476	21.877	22.207	22.1352	21.9551	22.2115	21.8329	22.0683	TRUE	0.30299	0.191385	1.14186			20.7875	21.4692	20.9195	21.0167	21.2323	21.085	21.2439	21.0831	21.0605	20.8287	21.0904	21.0613	TRUE	0.879458	-0.0236927	0.983712
Q7Z4S6	KIF21A	KIF21A KIAA1708 KIF2	Kinesin-like protein KIF21A (Kinesin-like protein KIF2) (Renal carcinoma antigen NY-REN-62)	21	23.8535	24.2209	23.9482	24.12	23.5176	23.932	23.8599	24.3151	24.4864	24.0874	23.8606	24.1219	TRUE	0.156163	0.189859	1.14065			22.9776	22.6525	22.7757	23.0594	22.962	22.8854	22.8138	22.8932	22.7639	23.1883	22.9703	22.9259	TRUE	0.58559	0.0404644	1.02844
P50454	SERPINH1	SERPINH1 CBP1 CBP2 HSP47 SERPINH2 PIG14	Serpin H1 (47 kDa heat shock protein) (Arsenic-transactivated protein 3) (AsTP3) (Cell proliferation-inducing gene 14 protein) (Collagen-binding protein) (Colligin) (Rheumatoid arthritis-related antigen RA-A47)	2	18.9339	19.2902	19.3509	20.0014	19.1187	19.339	19.213	19.3251	19.4089	19.0508	20.6455	19.5287	TRUE	0.65706	0.189646	1.14048			17.6121	17.7255	19.0558	18.302	18.267	18.1925	17.8311	18.2767	19.179	18.1049	17.7441	18.2272	TRUE	0.859285	0.0346767	1.02433
P17655	CAPN2	CAPN2 CANPL2	Calpain-2 catalytic subunit (EC 3.4.22.53) (Calcium-activated neutral proteinase 2) (CANP 2) (Calpain M-type) (Calpain large polypeptide L2) (Calpain-2 large subunit) (Millimolar-calpain) (M-calpain)	11	22.8591	22.4233	22.2436	22.5853	22.3248	22.4872	22.9098	22.6747	22.6936	22.9462	22.1587	22.6766	TRUE	0.163492	0.189341	1.14024			21.309	22.472	21.8869	20.9285	21.4518	21.6096	21.6454	21.9174	21.4468	21.1239	21.6298	21.5526	TRUE	0.770711	-0.0570007	0.96126
P13611	VCAN	VCAN CSPG2	Versican core protein (Chondroitin sulfate proteoglycan core protein 2) (Chondroitin sulfate proteoglycan 2) (Glial hyaluronate-binding protein) (GHAP) (Large fibroblast proteoglycan) (PG-M)	22	28.2991	27.8074	27.8635	27.9403	26.7643	27.7349	28.4052	27.8618	28.078	28.2158	27.057	27.9236	TRUE	0.0157621	0.188647	1.13969			27.0093	28.5437	26.4875	25.6068	26.899	26.9093	27.2797	27.6207	26.4272	25.5995	26.748	26.735	TRUE	0.432681	-0.174257	0.886224
P61106	RAB14	RAB14	Ras-related protein Rab-14	14	24.678	24.4278	24.8418	24.4782	24.7466	24.6345	24.7406	24.7592	24.7598	25.0184	24.8306	24.8217	TRUE	0.165266	0.187255	1.1386			23.7383	23.571	23.5643	23.9585	23.7483	23.7161	24.117	23.7417	23.8505	24.0818	23.9688	23.952	TRUE	0.00622539	0.235878	1.17762
Q8IW45	NAXD	NAXD CARKD	ATP-dependent (S)-NAD(P)H-hydrate dehydratase (EC 4.2.1.93) (ATP-dependent NAD(P)HX dehydratase) (Carbohydrate kinase domain-containing protein) (NAD(P)HX dehydratase)	12	23.956	24.1886	23.8807	24.0223	23.8923	23.988	24.1191	24.0784	24.2954	24.0851	24.298	24.1752	TRUE	0.137421	0.187196	1.13855			22.9657	23.1307	22.6259	23.0971	23.1127	22.9864	23.3631	23.2995	22.9144	22.9227	22.6764	23.0352	TRUE	0.768055	0.0488224	1.03442
P30626	SRI	SRI	Sorcin (22 kDa protein) (CP-22) (CP22) (V19)	11	26.7976	26.5836	26.4036	26.6033	26.1482	26.5073	26.8649	26.7869	27.0827	26.8615	25.8737	26.6939	TRUE	0.292365	0.18668	1.13814			25.0929	25.5306	25.5766	25.4268	25.3683	25.3991	25.1231	25.4995	25.5138	25.4585	25.4691	25.4128	TRUE	0.653457	0.013718	1.00955
P26639	TARS1	TARS1 TARS	Threonine--tRNA ligase 1, cytoplasmic (EC 6.1.1.3) (Threonyl-tRNA synthetase) (ThrRS) (Threonyl-tRNA synthetase 1)	9	22.5912	21.8311	21.9041	22.6277	23.0541	22.4016	22.6571	22.6261	22.5401	22.4273	22.6865	22.5874	TRUE	0.461593	0.18582	1.13746			22.0105	22.1573	22.0137	21.6513	21.746	21.9158	21.9899	21.8216	21.5656	21.7775	21.8642	21.8037	TRUE	0.398179	-0.112024	0.925289
Q9H254	SPTBN4	SPTBN4 KIAA1642 SPTBN3	Spectrin beta chain, non-erythrocytic 4 (Beta-IV spectrin) (Spectrin, non-erythroid beta chain 3)	17	23.6206	24.324	23.478	24.7738	24.3012	24.0995	23.7851	24.3875	23.9126	24.7666	24.5719	24.2847	TRUE	0.0764973	0.185214	1.13699			21.8805	21.7036	22.6227	22.9035	22.8705	22.3962	21.4742	22.3328	22.3922	22.4583	22.1464	22.1608	TRUE	0.364228	-0.235402	0.849448
P10768	ESD	ESD	S-formylglutathione hydrolase (FGH) (EC 3.1.2.12) (Esterase D) (Methylumbelliferyl-acetate deacetylase) (EC 3.1.1.56)	8	24.3892	23.6191	23.4224	23.6367	23.7045	23.7544	24.4944	24.1246	23.8985	23.746	23.4336	23.9394	TRUE	0.264495	0.185045	1.13685			23.4574	23.9038	22.9759	22.6588	23.3941	23.278	23.3427	23.7644	23.3185	23.3059	23.4447	23.4352	TRUE	0.352571	0.157246	1.11516
P61758	VBP1	VBP1 PFDN3	Prefoldin subunit 3 (HIBBJ46) (von Hippel-Lindau-binding protein 1) (VBP-1) (VHL-binding protein 1)	3	19.8342	20.7934	19.2597	19.0427	18.9258	19.5712	19.9881	20.2589	19.702	19.8789	18.9458	19.7547		0.465218	0.183555	1.13568			19.8302	19.8559	19.9511	20.5338	19.1258	19.8594	19.8492	19.2492	20.1038	20.2161	19.3856	19.7608	TRUE	0.570905	-0.098608	0.933934
O15540	FABP7	FABP7 BLBP FABPB MRG	Fatty acid-binding protein, brain (Brain lipid-binding protein) (BLBP) (Brain-type fatty acid-binding protein) (B-FABP) (Fatty acid-binding protein 7) (Mammary-derived growth inhibitor related)	7	25.1035	25.6507	24.2446	24.9817	25.8195	25.16	25.1484	25.213	25.377	25.0362	25.9372	25.3424	TRUE	0.517971	0.182361	1.13474			24.1747	24.9396	23.694	23.3881	23.9788	24.035	24.6921	24.8178	23.9345	23.7543	24.5236	24.3444	TRUE	0.0627666	0.309404	1.2392
P60983	GMFB	GMFB	Glia maturation factor beta (GMF-beta)	7	23.6196	23.3024	22.8525	23.7521	24.199	23.5451	23.5784	23.8734	23.4963	23.792	23.8912	23.7263	TRUE	0.379735	0.181164	1.1338			23.5289	23.3515	22.841	22.9187	23.3693	23.2019	23.4475	23.1771	22.8873	23.2398	23.2761	23.2056	TRUE	0.968188	0.00368614	1.00256
P00352	ALDH1A1	ALDH1A1 ALDC ALDH1 PUMB1	Retinal dehydrogenase 1 (RALDH 1) (RalDH1) (EC 1.2.1.-) (EC 1.2.1.36) (ALDH-E1) (ALHDII) (Aldehyde dehydrogenase family 1 member A1) (Aldehyde dehydrogenase, cytosolic)	17	22.6331	22.0762	22.373	21.9846	22.423	22.298	23.0175	22.8137	21.6844	22.3806	22.4985	22.4789	TRUE	0.495009	0.180953	1.13363			22.2173	23.4796	21.8581	21.038	22.358	22.1902	22.6609	23.08	21.8587	21.5517	22.0789	22.246	TRUE	0.777466	0.0558582	1.03948
Q93034	CUL5	CUL5 VACM1	Cullin-5 (CUL-5) (Vasopressin-activated calcium-mobilizing receptor 1) (VACM-1)	10	24.2935	23.8624	23.2701	24.4613	24.5489	24.0872	24.6005	24.0567	24.1131	24.0655	24.505	24.2682	TRUE	0.426572	0.180934	1.13362			22.7732	22.7337	22.6126	22.7705	22.9038	22.7588	22.4424	22.2552	22.6549	22.4118	22.4241	22.4377	TRUE	0.02851	-0.32109	0.800465
Q07021	C1QBP	C1QBP GC1QBP HABP1 SF2P32	Complement component 1 Q subcomponent-binding protein, mitochondrial (ASF/SF2-associated protein p32) (Glycoprotein gC1qBP) (C1qBP) (Hyaluronan-binding protein 1) (Mitochondrial matrix protein p32) (gC1q-R protein) (p33) (SF2AP32)	5	22.7475	21.6481	22.1172	21.8616	21.5777	21.9904	22.3952	22.2463	21.8726	22.5778	21.7595	22.1703	TRUE	0.450257	0.179863	1.13278			19.9521	21.9133	21.0326	20.9078	21.028	20.9668	20.6638	21.7513	21.35	21.3922	21.5172	21.3349	TRUE	0.0659711	0.368127	1.29068
Q9UJC5	SH3BGRL2	SH3BGRL2 FASH3	SH3 domain-binding glutamic acid-rich-like protein 2 (Fovea-associated SH3 domain-binding protein)	2	20.9306	19.1021	20.7662	19.7934	21.2666	20.3718	20.9674	20.2347	20.2158	20.1808	21.1576	20.5513	TRUE	0.558747	0.179488	1.13248			19.8255	20.2115	20.3308	20.4415	20.6728	20.2964	20.4457	20.3954	20.412	20.7568	20.8552	20.573	TRUE	0.0417237	0.2766	1.21134
P62851	RPS25	RPS25	40S ribosomal protein S25 (Small ribosomal subunit protein eS25)	3	24.1431	24.4679	24.554	24.5792	23.5536	24.2596	24.2585	24.4564	24.7364	24.4812	24.2559	24.4377	TRUE	0.271547	0.178172	1.13145			25.9818	18.0533	26.6531	17.2459	18.5628	21.2994	25.8201	25.8065	17.707	18.0139	25.7117	22.6119	TRUE	0.68694	1.3125	2.48372
Q8TB36	GDAP1	GDAP1	Ganglioside-induced differentiation-associated protein 1 (GDAP1)	8	24.4466	25.622	24.2324	25.6381	24.8458	24.957	24.881	25.1556	25.4072	25.3742	24.8542	25.1344	TRUE	0.575488	0.177452	1.13089			24.0643	23.4978	23.6419	24.0842	24.0032	23.8583	23.5099	23.4586	23.7408	23.5643	23.4399	23.5427	TRUE	0.0917952	-0.315568	0.803534
P49591	SARS1	SARS1 SARS SERS	Serine--tRNA ligase, cytoplasmic (EC 6.1.1.11) (Seryl-tRNA synthetase) (SerRS) (Seryl-tRNA(Ser/Sec) synthetase)	10	23.0988	22.0848	22.0507	22.1796	22.5251	22.3878	22.8006	22.3358	22.3922	22.415	22.881	22.5649	TRUE	0.217641	0.17715	1.13065			22.2827	22.3376	22.3727	22.2583	21.8614	22.2225	22.2066	22.1868	22.1302	22.3614	22.293	22.2356	TRUE	0.917988	0.0130512	1.00909
Q86WA6	BPHL	BPHL MCNAA	Valacyclovir hydrolase (VACVase) (Valacyclovirase) (EC 3.1.-.-) (Biphenyl hydrolase-like protein) (Biphenyl hydrolase-related protein) (Bph-rp) (Breast epithelial mucin-associated antigen) (MCNAA)	4	19.9405	18.6855	19.74	21.3511	19.1108	19.7656	21.3658	21.2907	18.9977	18.6685	19.3904	19.9426		0.854903	0.177044	1.13056			19.6737	20.4928	18.9327	17.9636	18.8594	19.1844	19.7161	20.058	19.9107	19.5348	20.112	19.8663	TRUE	0.145697	0.681912	1.60426
O95197	RTN3	RTN3 ASYIP NSPL2	Reticulon-3 (Homolog of ASY protein) (HAP) (Neuroendocrine-specific protein-like 2) (NSP-like protein 2) (Neuroendocrine-specific protein-like II) (NSP-like protein II) (NSPLII)	9	23.8011	24.5669	23.1173	23.7743	23.8745	23.8268	24.0384	24.3797	24.1668	23.8586	23.572	24.0031	TRUE	0.500582	0.176279	1.12997			23.5247	22.9135	23.3414	23.3206	22.3983	23.0997	23.0922	22.9131	23.3952	23.2511	22.4331	23.0169	TRUE	0.409641	-0.0827312	0.944268
O00505	KPNA3	KPNA3 QIP2	Importin subunit alpha-4 (Importin alpha Q2) (Qip2) (Karyopherin subunit alpha-3) (SRP1-gamma)	5	21.584	21.1999	18.3765	21.158	21.0863	20.6809	21.6605	21.6404	19.2832	21.8202	19.8767	20.8562	TRUE	0.662241	0.175257	1.12917			20.3556	20.4998	19.9247	19.9893	21.1763	20.3891	20.0657	20.4995	20.1252	20.1265	20.6183	20.287	TRUE	0.51137	-0.102123	0.931661
P11274	BCR	BCR BCR1 D22S11	Breakpoint cluster region protein (EC 2.7.11.1) (Renal carcinoma antigen NY-REN-26)	7	20.8382	21.0924	19.7267	21.2063	20.1047	20.5937	20.7448	21.0993	20.7206	20.7791	20.4997	20.7687	TRUE	0.511285	0.175055	1.12901			18.6352	19.8402	18.2712	18.9809	18.842	18.9139	18.7075	17.8456	18.9243	18.3018	19.2763	18.6111		0.562151	-0.302789	0.810684
Q96AG3	SLC25A46	SLC25A46 TB1	Solute carrier family 25 member 46	3	22.2429	22.961	19.6684	22.4496	21.0805	21.6805	22.1786	22.116	21.2607	22.8796	20.8411	21.8552	TRUE	0.69113	0.174717	1.12874			20.5525	20.9596	19.9798	20.804	20.7188	20.603	20.6411	19.1516	20.2462	20.9054	20.4789	20.2846	TRUE	0.450876	-0.318307	0.80201
P01213	PDYN	PDYN	Proenkephalin-B (Beta-neoendorphin-dynorphin) (Preprodynorphin) [Cleaved into: Alpha-neoendorphin; Beta-neoendorphin; Big dynorphin (Big Dyn); Dynorphin A(1-17) (Dyn-A17) (Dynorphin A); Dynorphin A(1-13); Dynorphin A(1-8); Leu-enkephalin; Rimorphin (Dynorphin B) (Dyn-B) (Dynorphin B(1-13)); Leumorphin (Dynorphin B-29)]	2	19.2509	20.142	19.7507	21.7609	19.6248	20.1059	20.5076	20.5602	20.2522	21.819	18.2543	20.2787	TRUE	0.709818	0.172789	1.12724			18.7739	18.6324	19.5004	18.9648	18.6784	18.91	19.029	18.3632	18.2703	18.5245	18.1169	18.4608		0.134433	-0.449193	0.732452
P14550	AKR1A1	AKR1A1 ALDR1 ALR	Aldo-keto reductase family 1 member A1 (EC 1.1.1.2) (EC 1.1.1.372) (EC 1.1.1.54) (Alcohol dehydrogenase [NADP(+)]) (Aldehyde reductase) (Glucuronate reductase) (EC 1.1.1.19) (Glucuronolactone reductase) (EC 1.1.1.20)	16	24.4819	24.1544	24.1707	24.3896	24.297	24.2987	24.4558	24.3975	24.8653	24.3354	24.3008	24.471	TRUE	0.288414	0.172283	1.12684			23.7006	23.8915	23.6101	23.0132	23.3055	23.5042	23.6301	23.91	23.6368	23.3264	23.3669	23.574	TRUE	0.340332	0.0698689	1.04962
O95817	BAG3	BAG3 BIS	BAG family molecular chaperone regulator 3 (BAG-3) (Bcl-2-associated athanogene 3) (Bcl-2-binding protein Bis) (Docking protein CAIR-1)	9	24.0951	23.1827	22.5588	23.5524	22.5576	23.1893	24.0062	23.5109	22.9933	23.8059	22.4917	23.3616	TRUE	0.179385	0.172271	1.12683			21.7154	22.1186	20.7029	20.8838	22.4865	21.5814	21.7892	21.8027	22.2986	20.9672	22.1987	21.8113	TRUE	0.549356	0.229845	1.17271
P09211	GSTP1	GSTP1 FAEES3 GST3	Glutathione S-transferase P (EC 2.5.1.18) (GST class-pi) (GSTP1-1)	7	24.9091	22.5449	24.8274	23.0664	23.7758	23.8247	25.1613	24.0062	23.2973	23.8114	23.7049	23.9962	TRUE	0.747726	0.171508	1.12624			23.2994	24.4442	23.4576	22.8246	23.6842	23.542	24.1714	24.7375	23.688	23.2648	24.0939	23.9911	TRUE	0.0161885	0.449114	1.3652
P55087	AQP4	AQP4	Aquaporin-4 (AQP-4) (Mercurial-insensitive water channel) (MIWC) (WCH4)	8	26.274	26.3973	24.6295	26.1406	23.5803	25.4043	26.337	26.0148	25.8427	26.1275	23.5568	25.5758	TRUE	0.562196	0.17146	1.1262			23.353	24.8083	24.1139	24.3416	25.6313	24.4496	24.5331	24.9921	24.988	24.6535	25.4852	24.9304	TRUE	0.115878	0.480756	1.39547
Q16822	PCK2	PCK2 PEPCK2	Phosphoenolpyruvate carboxykinase [GTP], mitochondrial (PEPCK-M) (EC 4.1.1.32)	4	19.4784	19.6397	19.5908	19.4099	19.7786	19.5795	19.3937	20.3488	19.6471	19.7371	19.6275	19.7508	TRUE	0.337822	0.171363	1.12612			18.1197	18.9188	18.4912	18.3937	18.553	18.4953	18.6276	19.5123	18.9041	18.7003	18.6569	18.8802	TRUE	0.0105966	0.384946	1.30581
P60660	MYL6	MYL6	Myosin light polypeptide 6 (17 kDa myosin light chain) (LC17) (Myosin light chain 3) (MLC-3) (Myosin light chain alkali 3) (Myosin light chain A3) (Smooth muscle and nonmuscle myosin light chain alkali 6)	8	25.0665	25.3329	25.066	25.3839	24.8052	25.1309	25.1899	25.3152	25.6425	25.6657	24.6946	25.3016	TRUE	0.231969	0.17066	1.12557			24.1045	24.3452	23.7727	23.5211	23.8429	23.9173	23.8899	24.2458	23.6411	23.7388	24.0232	23.9078	TRUE	0.91844	-0.00952721	0.993418
P35580	MYH10	MYH10	Myosin-10 (Cellular myosin heavy chain, type B) (Myosin heavy chain 10) (Myosin heavy chain, non-muscle IIb) (Non-muscle myosin heavy chain B) (NMMHC-B) (Non-muscle myosin heavy chain IIb) (NMMHC II-b) (NMMHC-IIB)	65	26.3124	26.6486	26.2052	26.4732	26.361	26.4001	26.5658	26.6127	26.7556	26.4722	26.4471	26.5707	TRUE	0.187087	0.170604	1.12553			25.3353	25.1119	24.8615	25.4033	25.341	25.2106	25.3994	25.3405	25.3653	25.4866	25.2712	25.3726	TRUE	0.172588	0.161979	1.11882
O43488	AKR7A2	AKR7A2 AFAR AFAR1 AKR7	Aflatoxin B1 aldehyde reductase member 2 (EC 1.1.1.n11) (AFB1 aldehyde reductase 1) (AFB1-AR 1) (Aldoketoreductase 7) (Succinic semialdehyde reductase) (SSA reductase)	11	23.9168	23.6657	23.5706	24.2094	23.6894	23.8104	24.2724	23.9476	23.8566	24.1964	23.625	23.9796	TRUE	0.121371	0.169232	1.12446			22.8186	23.7671	22.7673	22.3099	22.9931	22.9312	23.163	23.4538	22.9432	22.6014	23.1016	23.0526	TRUE	0.35567	0.121412	1.0878
O94967	WDR47	WDR47 KIAA0893	WD repeat-containing protein 47 (Neuronal enriched MAP-interacting protein) (Nemitin)	5	22.463	22.4464	21.5222	22.5862	21.8165	22.1668	22.312	22.7329	22.1352	22.2066	22.2895	22.3352	TRUE	0.420957	0.168396	1.12381			21.3486	21.4192	21.2788	21.2853	21.3967	21.3457	21.3669	21.3844	21.4083	21.2401	21.5893	21.3978	TRUE	0.328516	0.0520916	1.03677
Q8WZA9	IRGQ	IRGQ IRGQ1 FKSG27	Immunity-related GTPase family Q protein	3	18.6605	22.3157	20.95	20.3562	22.1467	20.8858	20.3931	21.5747	20.9216	20.4686	21.9114	21.0539	TRUE	0.707555	0.168071	1.12356			20.4682	18.1009	18.1371	20.7257	20.3933	19.565	20.6219	20.2061	20.2697	20.711	20.2682	20.4154	TRUE	0.177206	0.850348	1.80294
P21397	MAOA	MAOA	Amine oxidase [flavin-containing] A (EC 1.4.3.4) (Monoamine oxidase type A) (MAO-A)	12	24.1724	23.8286	23.3655	23.5695	23.4073	23.6687	23.8651	24.0813	23.7061	24.0039	23.5243	23.8362	TRUE	0.266127	0.167496	1.12311			22.4642	22.5992	22.1522	22.1174	22.3148	22.3295	22.5993	22.7205	22.2554	22.0422	22.685	22.4605	TRUE	0.13867	0.130931	1.095
O75891	ALDH1L1	ALDH1L1 FTHFD	Cytosolic 10-formyltetrahydrofolate dehydrogenase (10-FTHFDH) (FDH) (EC 1.5.1.6) (Aldehyde dehydrogenase family 1 member L1)	35	25.6285	24.9471	24.5046	24.5606	25.2243	24.973	25.792	25.1404	25.0834	24.7042	24.9737	25.1388	TRUE	0.275699	0.165715	1.12172			24.0642	24.0863	24.3497	23.8296	24.2576	24.1175	24.0572	24.5869	24.4158	24.1515	24.654	24.3731	TRUE	0.0582797	0.255601	1.19383
O43674	NDUFB5	NDUFB5	NADH dehydrogenase [ubiquinone] 1 beta subcomplex subunit 5, mitochondrial (Complex I-SGDH) (CI-SGDH) (NADH-ubiquinone oxidoreductase SGDH subunit)	2	22.8043	19.1933	22.1223	23.1588	23.2693	22.1096	22.6191	20.3269	22.902	22.1385	23.3899	22.2753	TRUE	0.683137	0.165705	1.12171			21.8086	21.9464	21.951	22.2343	19.5329	21.4946	21.9718	21.9139	21.971	22.4535	21.907	22.0434	TRUE	0.297515	0.5488	1.46287
Q9HA65	TBC1D17	TBC1D17	TBC1 domain family member 17	7	21.8538	21.9298	21.2337	22.2018	22.0816	21.8601	21.9998	22.2157	21.9159	21.9857	22.0094	22.0253	TRUE	0.348239	0.165148	1.12128			21.0841	21.1986	20.6957	21.4379	21.0153	21.0863	20.1043	20.8523	20.8105	20.9246	20.1583	20.57	TRUE	0.0568777	-0.516277	0.699174
Q9BVK6	TMED9	TMED9 GP25L2	Transmembrane emp24 domain-containing protein 9 (GMP25) (Glycoprotein 25L2) (p24 family protein alpha-2) (p24alpha2) (p25)	3	20.1831	20.8864	22.777	21.0328	20.5124	21.0784	21.649	20.7888	22.4525	20.828	20.4987	21.2434	TRUE	0.642642	0.165033	1.12119			18.5038	19.9474	20.2789	20.7682	20.0687	19.9134	18.3647	16.6966	20.6054	18.0857	18.6535	18.4812	TRUE	0.108037	-1.43221	0.370563
Q16401	PSMD5	PSMD5 KIAA0072	26S proteasome non-ATPase regulatory subunit 5 (26S protease subunit S5 basic) (26S proteasome subunit S5B)	4	20.6845	19.9938	20.4849	20.5443	20.0399	20.3495	20.5603	20.5909	19.868	20.6647	20.8854	20.5138	TRUE	0.560893	0.164356	1.12067			19.1543	19.728	19.5596	19.6084	20.2492	19.6599	19.6072	19.635	19.5287	19.3515	19.4227	19.509	TRUE	0.504831	-0.150874	0.900705
Q99447	PCYT2	PCYT2	Ethanolamine-phosphate cytidylyltransferase (EC 2.7.7.14) (CTP:phosphoethanolamine cytidylyltransferase) (Phosphorylethanolamine transferase)	10	23.8611	24.0853	23.5425	23.9518	24.0603	23.9002	24.0296	24.2043	23.9843	24.0421	24.0591	24.0639	TRUE	0.0938755	0.163708	1.12016			23.6012	23.2568	23.208	23.4232	23.7799	23.4538	23.4524	23.0163	23.3675	23.1498	23.2433	23.2458	TRUE	0.137477	-0.207957	0.865762
O00410	IPO5	IPO5 KPNB3 RANBP5	Importin-5 (Imp5) (Importin subunit beta-3) (Karyopherin beta-3) (Ran-binding protein 5) (RanBP5)	11	22.615	22.157	21.8794	21.3134	22.8013	22.1532	22.9884	22.6331	21.7228	22.0871	22.1527	22.3168	TRUE	0.552434	0.163618	1.12009			21.6527	22.1018	21.5924	21.3085	21.6348	21.658	21.7496	22.0307	21.2591	21.7626	21.8823	21.7369	TRUE	0.589391	0.078817	1.05615
P11142	HSPA8	HSPA8 HSC70 HSP73 HSPA10	Heat shock cognate 71 kDa protein (Heat shock 70 kDa protein 8) (Lipopolysaccharide-associated protein 1) (LAP-1) (LPS-associated protein 1)	33	29.0961	28.8203	28.7475	28.7958	29.7813	29.0482	29.4221	29.2484	28.8915	28.882	29.6127	29.2113	TRUE	0.189008	0.16317	1.11975			28.6056	28.5482	28.2776	28.2078	28.4008	28.408	28.6519	28.3917	28.3798	28.3464	28.512	28.4564	TRUE	0.416075	0.0483685	1.03409
P28289	TMOD1	TMOD1 D9S57E TMOD	Tropomodulin-1 (Erythrocyte tropomodulin) (E-Tmod)	4	22.5813	19.3084	22.4989	22.4644	22.0865	21.7879	22.3571	22.2497	22.4732	22.4604	20.2128	21.9506	TRUE	0.844378	0.162732	1.11941			20.0487	21.0913	20.1513	21.4999	21.2803	20.8143	20.3821	20.7658	20.9933	21.7559	21.0665	20.9927	TRUE	0.442505	0.178412	1.13164
P24534	EEF1B2	EEF1B2 EEF1B EF1B	Elongation factor 1-beta (EF-1-beta)	2	21.2051	20.0539	21.2007	20.711	20.1713	20.6684	21.4197	21.2107	20.6114	20.7102	20.2026	20.8309	TRUE	0.59641	0.162513	1.11924			19.7221	20.4492	19.7233	20.413	19.8007	20.0217	19.4165	19.824	19.1374	19.7216	20.1625	19.6524	TRUE	0.130114	-0.369266	0.774176
Q14914	PTGR1	PTGR1 LTB4DH	Prostaglandin reductase 1 (PRG-1) (EC 1.3.1.-) (15-oxoprostaglandin 13-reductase) (EC 1.3.1.48) (NADP-dependent leukotriene B4 12-hydroxydehydrogenase) (EC 1.3.1.74)	4	21.7903	21.7131	21.0511	21.7791	22.7162	21.81	21.7164	21.9361	21.2668	22.2734	22.6669	21.9719	TRUE	0.195222	0.161929	1.11878			21.5758	22.0864	21.2826	21.1052	21.0895	21.4279	21.7863	21.4718	21.4114	21.0683	21.3519	21.4179	TRUE	0.953217	-0.00995216	0.993125
O00408	PDE2A	PDE2A	cGMP-dependent 3',5'-cyclic phosphodiesterase (EC 3.1.4.17) (Cyclic GMP-stimulated phosphodiesterase) (CGS-PDE) (cGSPDE)	19	24.5049	25.2113	23.9585	25.0478	24.8584	24.7162	24.4748	24.9334	24.9887	24.8351	25.1525	24.8769	TRUE	0.538077	0.16071	1.11784			23.5617	22.7676	23.061	23.4446	23.6463	23.2962	23.7382	23.47	23.2654	23.2582	23.9509	23.5366	TRUE	0.166526	0.240317	1.18125
P09104	ENO2	ENO2	Gamma-enolase (EC 4.2.1.11) (2-phospho-D-glycerate hydro-lyase) (Enolase 2) (Neural enolase) (Neuron-specific enolase) (NSE)	25	28.09	27.3997	26.8507	27.2461	28.1958	27.5564	27.7647	27.3937	27.3255	27.3761	28.7252	27.717	TRUE	0.366981	0.160604	1.11775			27.1294	26.843	27.7911	27.4728	27.556	27.3585	27.9969	27.4466	28.1293	27.5836	27.6297	27.7572	TRUE	0.0571621	0.398775	1.31839
P68036	UBE2L3	UBE2L3 UBCE7 UBCH7	Ubiquitin-conjugating enzyme E2 L3 (EC 2.3.2.23) (E2 ubiquitin-conjugating enzyme L3) (L-UBC) (UbcH7) (Ubiquitin carrier protein L3) (Ubiquitin-conjugating enzyme E2-F1) (Ubiquitin-protein ligase L3)	3	18.9675	19.6775	18.1504	19.4394	19.5034	19.1477	19.4301	19.6678	19.0344	18.9847	19.4227	19.308		0.528308	0.160304	1.11752			20.1523	19.9851	18.0978	19.5247	19.7786	19.5077	20.2303	19.9887	20.4826	19.7341	18.2114	19.7294	TRUE	0.742773	0.221735	1.16613
Q9Y376	CAB39	CAB39 MO25 CGI-66	Calcium-binding protein 39 (MO25alpha) (Protein Mo25)	3	20.2248	20.4384	19.7337	18.8602	18.953	19.642	20.0446	19.8191	19.1395	19.4945	20.5101	19.8015		0.721189	0.15951	1.11691			16.9981	22.8027	18.0125	28.0442	22.979	21.7673	22.9482	22.8939	17.8952	22.8798	23.0087	21.9252	TRUE	0.932847	0.157876	1.11564
P23763	VAMP1	VAMP1 SYB1	Vesicle-associated membrane protein 1 (VAMP-1) (Synaptobrevin-1)	8	22.3697	20.1844	20.8372	19.8377	21.0477	20.8553	21.9511	20.9128	20.3363	21.181	20.6887	21.0139	TRUE	0.691617	0.1586	1.1162			20.0865	20.0661	21.6632	21.5151	21.0441	20.875	20.7893	20.5953	21.6875	21.6266	20.6277	21.0653	TRUE	0.389705	0.190273	1.14098
P07355	ANXA2	ANXA2 ANX2 ANX2L4 CAL1H LPC2D	Annexin A2 (Annexin II) (Annexin-2) (Calpactin I heavy chain) (Calpactin-1 heavy chain) (Chromobindin-8) (Lipocortin II) (Placental anticoagulant protein IV) (PAP-IV) (Protein I) (p36)	24	24.7649	24.2313	28.398	24.6511	23.8837	25.1858	26.5349	25.0872	25.7148	25.5588	23.8249	25.3441	TRUE	0.846562	0.158312	1.11598			23.8698	25.1208	23.2582	23.871	23.0625	23.8365	23.7078	25.0933	22.8997	23.0499	23.6069	23.6715	TRUE	0.499701	-0.164929	0.891972
Q9NS86	LANCL2	LANCL2 GPR69B TASP	LanC-like protein 2 (Testis-specific adriamycin sensitivity protein)	10	23.5268	23.7183	23.3444	23.5777	23.6792	23.5693	23.7593	23.819	23.3781	23.771	23.9088	23.7272	TRUE	0.0156551	0.15796	1.11571			22.5158	22.528	22.2666	22.6359	22.4587	22.481	22.5189	22.7401	22.3209	22.6007	22.9768	22.6315	TRUE	0.210769	0.150487	1.10994
P31146	CORO1A	CORO1A CORO1	Coronin-1A (Coronin-like protein A) (Clipin-A) (Coronin-like protein p57) (Tryptophan aspartate-containing coat protein) (TACO)	20	25.9293	27.0085	25.8192	26.743	26.5594	26.4119	26.1072	26.6998	26.9765	26.4242	26.6364	26.5688	TRUE	0.591404	0.156924	1.11491			25.2609	25.1016	24.5651	25.6866	25.4253	25.2079	25.2205	25.2331	24.9631	25.2931	25.2644	25.1948	TRUE	0.926809	-0.0130688	0.990982
P22830	FECH	FECH	Ferrochelatase, mitochondrial (EC 4.99.1.1) (Heme synthase) (Protoheme ferro-lyase)	4	21.0506	21.8908	20.6462	21.1577	18.9046	20.73	20.7598	21.2368	21.033	21.4559	19.9447	20.886	TRUE	0.62192	0.156057	1.11424			19.9082	19.6446	20.2594	20.2016	19.9227	19.9873	19.6837	20.1264	20.0047	20.0284	20.3857	20.0458	TRUE	0.747348	0.0585106	1.04139
P05556	ITGB1	ITGB1 FNRB MDF2 MSK12	Integrin beta-1 (Fibronectin receptor subunit beta) (Glycoprotein IIa) (GPIIA) (VLA-4 subunit beta) (CD antigen CD29)	7	21.7383	19.8153	21.5201	21.7534	19.877	20.9408	21.579	20.8483	21.2144	21.2765	20.5573	21.0951	TRUE	0.630249	0.15426	1.11285			20.2849	21.4569	18.7936	19.4883	19.5671	19.9182	20.3047	20.9075	17.8262	19.583	19.9319	19.7107	TRUE	0.43835	-0.207523	0.866023
P18085	ARF4	ARF4 ARF2	ADP-ribosylation factor 4	7	22.0699	21.539	22.3088	22.0916	22.6537	22.1326	22.2093	22.1393	22.4069	22.2474	22.4217	22.2849	TRUE	0.314588	0.152327	1.11136			20.226	21.7072	21.1878	20.3759	21.4131	20.982	20.8697	21.3715	21.1401	21.3602	21.2126	21.1908	TRUE	0.461986	0.208825	1.15575
P09486	SPARC	SPARC ON	SPARC (Basement-membrane protein 40) (BM-40) (Osteonectin) (ON) (Secreted protein acidic and rich in cysteine)	3	19.3295	19.1873	19.4082	20.3389	18.6764	19.3881	18.8179	20.4038	19.0835	20.0109	19.3853	19.5403		0.679426	0.152219	1.11128			20.9967	21.5674	18.9424	19.0304	20.2848	20.1643	18.9028	21.0114	18.9564	17.7445	20.604	19.4438	TRUE	0.17606	-0.720507	0.606884
Q4G0N4	NADK2	NADK2 C5orf33 MNADK NADKD1	NAD kinase 2, mitochondrial (EC 2.7.1.23) (Mitochondrial NAD kinase) (NAD kinase domain-containing protein 1, mitochondrial)	16	24.4975	24.4483	23.9983	24.4102	23.841	24.239	24.1531	24.5618	24.6734	24.4718	24.096	24.3912	TRUE	0.406963	0.152181	1.11125			23.1977	23.29	22.8376	22.929	23.3932	23.1295	23.3473	23.3584	23.2086	22.9624	23.19	23.2133	TRUE	0.416939	0.0838631	1.05985
Q92890	UFD1	UFD1 UFD1L	Ubiquitin recognition factor in ER-associated degradation protein 1 (Ubiquitin fusion degradation protein 1) (UB fusion protein 1)	3	20.0004	20.0657	20.6607	19.7406	19.8232	20.0581	20.2683	20.1939	19.7024	20.2011	20.6769	20.2085	TRUE	0.645467	0.150415	1.10989			18.7092	18.777	19.1237	18.1859	18.1711	18.5934	18.6759	18.7907	17.9565	17.4395	19.6427	18.5011	TRUE	0.847373	-0.0923069	0.938022
O75323	NIPSNAP2	NIPSNAP2 GBAS	Protein NipSnap homolog 2 (NipSnap2) (Glioblastoma-amplified sequence)	8	24.7736	25.2794	24.4485	24.996	25.0473	24.909	24.2833	25.1977	25.6718	24.737	25.4052	25.059	TRUE	0.645586	0.150043	1.1096			24.461	24.308	24.142	24.5257	24.3564	24.3586	24.0178	24.2554	24.5235	24.3699	24.0423	24.2418	TRUE	0.45494	-0.116803	0.922229
O75367	MACROH2A1	MACROH2A1 H2AFY	Core histone macro-H2A.1 (Histone macroH2A1) (mH2A1) (Histone H2A.y) (H2A/y) (Medulloblastoma antigen MU-MB-50.205)	3	21.7319	22.0604	22.0061	21.3749	21.4728	21.7292	21.9223	21.7091	21.7683	22.0585	21.9212	21.8759	TRUE	0.49818	0.146658	1.107			21.274	21.0454	22.1117	21.2709	20.4009	21.2206	21.4013	21.1746	21.299	21.088	21.0474	21.2021	TRUE	0.941907	-0.0185406	0.987231
P53602	MVD	MVD MPD	Diphosphomevalonate decarboxylase (EC 4.1.1.33) (Mevalonate (diphospho)decarboxylase) (MDDase) (Mevalonate pyrophosphate decarboxylase)	2	19.516	21.8289	21.9548	21.4804	21.7477	21.3056	21.0905	21.4353	21.7925	21.2203	21.7214	21.452	TRUE	0.706539	0.146443	1.10684			20.4521	20.7604	20.8442	20.1103	20.5409	20.5416	20.1897	20.1829	20.5614	20.3485	20.1528	20.2871	TRUE	0.132964	-0.254522	0.838265
Q15904	ATP6AP1	ATP6AP1 ATP6IP1 ATP6S1 VATPS1 XAP3	V-type proton ATPase subunit S1 (V-ATPase subunit S1) (Protein XAP-3) (V-ATPase Ac45 subunit) (V-ATPase S1 accessory protein) (Vacuolar proton pump subunit S1)	5	23.8861	23.0007	22.9842	23.5781	23.7683	23.4435	23.1645	23.7805	23.7222	23.8451	23.437	23.5899	TRUE	0.64645	0.146361	1.10677			22.6635	21.2086	21.7841	22.6292	22.3688	22.1308	21.9108	21.7292	22.1172	23.0201	22.467	22.2488	TRUE	0.632366	0.117994	1.08522
Q9H444	CHMP4B	CHMP4B C20orf178 SHAX1	Charged multivesicular body protein 4b (Chromatin-modifying protein 4b) (CHMP4b) (SNF7 homolog associated with Alix 1) (SNF7-2) (hSnf7-2) (Vacuolar protein sorting-associated protein 32-2) (Vps32-2) (hVps32-2)	5	22.7468	23.3129	22.9376	22.6506	22.4201	22.8136	22.8689	23.2023	23.0425	22.8724	22.8113	22.9595	TRUE	0.149169	0.145883	1.10641			21.8982	21.5506	21.7254	21.9895	21.6364	21.76	21.7539	21.7824	21.7037	22.274	21.7875	21.8603	TRUE	0.279196	0.100265	1.07197
P49419	ALDH7A1	ALDH7A1 ATQ1	Alpha-aminoadipic semialdehyde dehydrogenase (Alpha-AASA dehydrogenase) (EC 1.2.1.31) (Aldehyde dehydrogenase family 7 member A1) (EC 1.2.1.3) (Antiquitin-1) (Betaine aldehyde dehydrogenase) (EC 1.2.1.8) (Delta1-piperideine-6-carboxylate dehydrogenase) (P6c dehydrogenase)	21	26.1084	25.7954	25.6861	26.0081	25.9708	25.9137	26.4458	25.6509	25.8927	26.2612	26.0473	26.0596	TRUE	0.15741	0.145861	1.10639			25.2991	25.9567	25.2	24.4546	25.3033	25.2427	25.5796	25.6546	25.5138	24.8807	25.3495	25.3956	TRUE	0.302962	0.152903	1.1118
O00445	SYT5	SYT5	Synaptotagmin-5 (Synaptotagmin V) (SytV)	7	21.9568	22.3298	21.4768	22.6917	21.6631	22.0236	22.6731	23.0778	23.3522	19.2499	22.4934	22.1693	TRUE	0.88222	0.145615	1.1062			17.4765	18.1478	19.7578	20.1345	20.7954	19.2624	21.7127	21.0082	18.7752	20.2824	20.7909	20.5139	TRUE	0.271484	1.25149	2.38087
P13716	ALAD	ALAD	Delta-aminolevulinic acid dehydratase (ALADH) (EC 4.2.1.24) (Porphobilinogen synthase)	8	23.6577	22.6063	23.5884	22.6427	22.9913	23.0973	24.036	23.1497	22.4691	23.3671	23.1905	23.2425	TRUE	0.680816	0.145179	1.10587			22.3892	23.4414	22.4009	21.7472	21.9256	22.3809	22.9805	23.2734	22.4368	22.1332	22.4045	22.6457	TRUE	0.136868	0.264843	1.20151
Q96KP4	CNDP2	CNDP2 CN2 CPGL HEL-S-13 PEPA	Cytosolic non-specific dipeptidase (EC 3.4.13.18) (CNDP dipeptidase 2) (Carnosine dipeptidase II) (Epididymis secretory protein Li 13) (Glutamate carboxypeptidase-like protein 1) (Peptidase A)	20	26.6799	26.0548	26.0652	26.3825	26.288	26.2941	26.7863	26.4053	26.3184	26.46	26.2243	26.4389	TRUE	0.114447	0.144804	1.10558			24.9706	25.8587	25.1863	24.7867	25.365	25.2335	25.4078	25.6801	25.6101	25.4685	25.1997	25.4732	TRUE	0.240826	0.239771	1.18081
Q16762	TST	TST	Thiosulfate sulfurtransferase (EC 2.8.1.1) (Rhodanese)	5	22.0283	21.8213	21.8532	22.2736	20.9351	21.7823	22.2407	22.247	22.2568	22.2508	20.6378	21.9266	TRUE	0.350806	0.14433	1.10522			20.7007	21.5322	21.4047	21.1228	21.3988	21.2318	20.686	21.6148	21.748	21.3388	21.024	21.2823	TRUE	0.70092	0.0504986	1.03562
Q9NV96	TMEM30A	TMEM30A C6orf67 CDC50A	Cell cycle control protein 50A (P4-ATPase flippase complex beta subunit TMEM30A) (Transmembrane protein 30A)	6	24.2149	24.3621	23.8552	24.8097	24.0747	24.2633	24.2646	24.3067	24.662	24.6253	24.1786	24.4074	TRUE	0.451242	0.14413	1.10506			23.1286	23.0296	22.638	22.7266	23.3416	22.9729	23.1529	22.8242	23.2618	22.5537	22.9022	22.939	TRUE	0.859884	-0.0339058	0.976772
Q6YN16	HSDL2	HSDL2 C9orf99 SDR13C1	Hydroxysteroid dehydrogenase-like protein 2 (EC 1.-.-.-) (Short chain dehydrogenase/reductase family 13C member 1)	7	23.0915	23.7106	22.934	23.7954	23.2047	23.3472	23.2206	23.7299	23.5525	23.6372	23.3131	23.4907	TRUE	0.328915	0.143437	1.10453			22.3606	22.2994	22.4562	17.7886	22.2473	21.4305	22.4639	22.4776	22.8082	22.3146	22.5339	22.5196	TRUE	0.274194	1.08917	2.12752
Q9UBW8	COPS7A	COPS7A CSN7A DERP10	COP9 signalosome complex subunit 7a (SGN7a) (Signalosome subunit 7a) (Dermal papilla-derived protein 10) (JAB1-containing signalosome subunit 7a)	6	22.3344	22.5539	22.1598	22.3431	22.5274	22.3837	22.2857	22.5287	22.5238	22.7598	22.5292	22.5254	TRUE	0.237685	0.14171	1.10321			22.5149	22.4976	22.4579	22.9776	22.3068	22.5509	22.2615	21.9798	22.372	22.6942	22.3754	22.3366	TRUE	0.095646	-0.214357	0.86193
Q9Y3A5	SBDS	SBDS CGI-97	Ribosome maturation protein SBDS (Shwachman-Bodian-Diamond syndrome protein)	5	22.0359	22.6681	21.619	22.8215	21.8064	22.1902	22.2672	22.4907	22.2557	22.6821	21.9635	22.3318	TRUE	0.390736	0.141654	1.10317			21.2006	21.5634	21.0467	20.5609	21.3932	21.1529	20.5222	20.7263	21.0953	20.5282	20.6474	20.7039	TRUE	0.0760039	-0.449072	0.732514
P30043	BLVRB	BLVRB FLR	Flavin reductase (NADPH) (FR) (EC 1.5.1.30) (Biliverdin reductase B) (BVR-B) (EC 1.3.1.24) (Biliverdin-IX beta-reductase) (Green heme-binding protein) (GHBP) (NADPH-dependent diaphorase) (NADPH-flavin reductase) (FLR)	5	23.2368	23.5278	23.2996	22.9916	22.6631	23.1438	23.2382	23.7083	23.5545	23.3077	22.6171	23.2852	TRUE	0.115769	0.141369	1.10295			21.683	22.3336	21.8986	21.3276	22.087	21.866	22.071	22.3259	21.8998	21.5672	21.7201	21.9168	TRUE	0.712313	0.0508492	1.03587
Q96AE4	FUBP1	FUBP1	Far upstream element-binding protein 1 (FBP) (FUSE-binding protein 1) (DNA helicase V) (hDH V)	6	21.5581	22.3972	20.8415	21.9441	21.0545	21.5591	21.8281	22.3419	21.4945	21.6418	21.1937	21.7	TRUE	0.428982	0.14091	1.1026			21.1083	20.2688	21.3909	21.3025	20.6132	20.9367	20.3126	20.0338	20.7394	20.7973	20.4591	20.4684	TRUE	0.0182437	-0.468305	0.722813
Q15365	PCBP1	PCBP1	Poly(rC)-binding protein 1 (Alpha-CP1) (Heterogeneous nuclear ribonucleoprotein E1) (hnRNP E1) (Nucleic acid-binding protein SUB2.3)	8	25.0214	25.4346	24.757	25.2697	24.6431	25.0252	25.2975	25.3788	25.0349	25.43	24.6887	25.166	TRUE	0.0972146	0.140814	1.10253			24.1066	24.1075	23.9247	24.3988	24.1659	24.1407	23.7147	23.9667	23.9101	24.1648	23.8959	23.9304	TRUE	0.0293908	-0.210272	0.864374
P42025	ACTR1B	ACTR1B CTRN2	Beta-centractin (Actin-related protein 1B) (ARP1B)	10	20.711	19.228	20.3046	19.4453	20.5289	20.0435	20.9301	20.7608	19.6163	19.3929	20.2169	20.1834	TRUE	0.730862	0.139849	1.10179			20.2128	20.1407	20.3904	20.2515	19.2892	20.0569	20.2088	20.3103	20.5787	20.5493	20.1904	20.3675	TRUE	0.116206	0.310608	1.24023
Q9P0K1	ADAM22	ADAM22 MDC2	Disintegrin and metalloproteinase domain-containing protein 22 (ADAM 22) (Metalloproteinase-disintegrin ADAM22-3) (Metalloproteinase-like, disintegrin-like, and cysteine-rich protein 2)	7	21.3656	20.2544	20.8312	20.8285	22.2954	21.115	20.9123	21.0568	20.7172	21.0662	22.5203	21.2546	TRUE	0.540585	0.139524	1.10154			21.0452	20.739	21.7675	21.4167	20.916	21.1769	21.154	21.1132	21.626	20.9652	20.1603	21.0037	TRUE	0.434644	-0.173161	0.886898
P08572	COL4A2	COL4A2	Collagen alpha-2(IV) chain [Cleaved into: Canstatin]	4	23.2924	22.8125	22.3674	22.4565	22.5884	22.7034	22.764	23.0537	23.3776	23.151	21.8674	22.8427	TRUE	0.699998	0.139317	1.10138			22.5391	22.6999	22.4173	21.7788	21.5182	22.1907	22.181	22.4626	22.0234	21.432	21.8152	21.9829	TRUE	0.182228	-0.207804	0.865854
Q9UPW8	UNC13A	UNC13A KIAA1032	Protein unc-13 homolog A (Munc13-1)	4	18.8318	21.3129	18.7696	19.4481	22.0493	20.0823	20.0301	19.8232	20.0795	19.2935	21.8818	20.2216		0.800588	0.139279	1.10135			20.2116	17.2484	20.1704	20.7159	20.2745	19.7241	19.9952	19.9815	18.374	19.9893	20.0461	19.6772	TRUE	0.953245	-0.0469231	0.967999
Q9GZM7	TINAGL1	TINAGL1 GIS5 LCN7 OLRG2 TINAGL PP6614 PSEC0088 UNQ204/PRO230	Tubulointerstitial nephritis antigen-like (Glucocorticoid-inducible protein 5) (Oxidized LDL-responsive gene 2 protein) (OLRG-2) (Tubulointerstitial nephritis antigen-related protein) (TIN Ag-related protein) (TIN-Ag-RP)	5	23.2836	22.0964	21.6182	21.9061	22.8508	22.351	22.8836	22.0921	22.813	22.4815	22.1695	22.4879	TRUE	0.706355	0.136943	1.09957			21.7402	21.708	21.7439	22.0513	20.7095	21.5906	21.3527	21.617	21.153	21.2803	21.3661	21.3538	TRUE	0.397705	-0.236775	0.84864
P47736	RAP1GAP	RAP1GAP KIAA0474 RAP1GA1	Rap1 GTPase-activating protein 1 (Rap1GAP) (Rap1GAP1)	5	22.4578	22.0278	21.7636	22.0332	22.2256	22.1016	21.7131	22.0146	21.8157	22.1314	23.5153	22.238	TRUE	0.697892	0.136415	1.09917			20.6688	20.2086	20.9989	20.2753	21.3564	20.7016	20.8764	20.7316	21.2612	21.2109	21.1289	21.0418	TRUE	0.150426	0.340186	1.26592
P78310	CXADR	CXADR CAR	Coxsackievirus and adenovirus receptor (CAR) (hCAR) (CVB3-binding protein) (Coxsackievirus B-adenovirus receptor) (HCVADR)	4	21.6393	22.6001	19.3323	22.2026	22.1001	21.5749	20.3585	22.0767	22.1593	22.397	21.5633	21.7109	TRUE	0.857771	0.136054	1.0989			20.5784	19.7515	19.0364	19.8434	18.3734	19.5166	18.0595	19.7493	18.1	18.7759	17.8962	18.5162		0.0774006	-1.00043	0.499852
P49748	ACADVL	ACADVL VLCAD	Very long-chain specific acyl-CoA dehydrogenase, mitochondrial (VLCAD) (EC 1.3.8.9)	15	22.7583	23.5124	23.2257	23.2356	22.6319	23.0728	23.1406	23.2654	23.2357	23.571	22.8293	23.2084	TRUE	0.305444	0.135626	1.09857			22.6629	23.1101	22.3744	22.7418	22.0938	22.5966	22.8405	23.2347	22.6302	22.8852	22.3662	22.7914	TRUE	0.00278317	0.194773	1.14454
Q15276	RABEP1	RABEP1 RAB5EP RABPT5 RABPT5A	Rab GTPase-binding effector protein 1 (Rabaptin-4) (Rabaptin-5) (Rabaptin-5alpha) (Renal carcinoma antigen NY-REN-17)	8	23.1855	23.9704	20.1738	23.9646	22.8987	22.8386	23.2314	23.7936	22.2525	23.5225	22.0707	22.9741	TRUE	0.802451	0.135553	1.09851			20.4379	20.4496	20.2911	20.6714	20.4763	20.4652	20.5416	20.0079	18.5281	20.5019	20.1023	19.9363	TRUE	0.17667	-0.528899	0.693084
P46108	CRK	CRK	Adapter molecule crk (Proto-oncogene c-Crk) (p38)	11	23.1165	23.224	23.1662	23.2676	23.3431	23.2235	23.1889	23.5643	23.4419	23.2204	23.3769	23.3585	TRUE	0.141817	0.134996	1.09809			22.7971	22.5617	22.3058	21.8751	22.4859	22.4051	22.4103	22.4968	22.4931	21.5566	22.1543	22.2222	TRUE	0.16545	-0.182903	0.880928
Q9Y617	PSAT1	PSAT1 PSA	Phosphoserine aminotransferase (EC 2.6.1.52) (Phosphohydroxythreonine aminotransferase) (PSAT)	16	25.9036	25.3558	25.3522	24.8658	25.7721	25.4499	26.1427	25.35	25.3709	25.1696	25.891	25.5848	TRUE	0.0891537	0.134937	1.09805			24.8553	26.3398	24.8693	23.6836	24.9315	24.9359	25.3158	26.061	25.3141	24.037	24.9238	25.1303	TRUE	0.252509	0.194429	1.14427
P09525	ANXA4	ANXA4 ANX4	Annexin A4 (35-beta calcimedin) (Annexin IV) (Annexin-4) (Carbohydrate-binding protein p33/p41) (Chromobindin-4) (Endonexin I) (Lipocortin IV) (P32.5) (PP4-X) (Placental anticoagulant protein II) (PAP-II) (Protein II)	12	21.2432	22.3949	24.4145	23.0681	21.2423	22.4726	22.2377	22.7682	23.6817	23.3754	20.9728	22.6072	TRUE	0.672019	0.134583	1.09778			20.5721	21.0153	20.6549	20.7174	20.6272	20.7174	21.417	21.7741	21.412	21.1233	20.7428	21.2939	TRUE	0.0138609	0.576469	1.4912
Q04917	YWHAH	YWHAH YWHA1	14-3-3 protein eta (Protein AS1)	20	28.3399	28.6837	27.4557	28.8089	28.0475	28.2671	28.1009	28.5004	28.5818	28.5342	28.2883	28.4011	TRUE	0.639468	0.133992	1.09733			27.0632	27.0331	26.5931	27.0218	27.3763	27.0175	26.6626	26.898	26.6674	26.6711	26.9871	26.7772	TRUE	0.0597366	-0.240231	0.84661
Q99943	AGPAT1	AGPAT1 G15	1-acyl-sn-glycerol-3-phosphate acyltransferase alpha (EC 2.3.1.51) (1-acylglycerol-3-phosphate O-acyltransferase 1) (1-AGP acyltransferase 1) (1-AGPAT 1) (Lysophosphatidic acid acyltransferase alpha) (LPAAT-alpha) (Protein G15)	2	20.5394	20.0323	18.54	20.5135	20.6793	20.0609	20.6277	20.3902	20.1805	20.3583	19.4161	20.1946	TRUE	0.788811	0.133668	1.09708			18.9089	18.9783	18.4455	19.0716	17.678	18.6164	18.6832	18.6385	19.5894	18.4377	17.8341	18.6366		0.951102	0.0201077	1.01404
Q96CT7	CCDC124	CCDC124	Coiled-coil domain-containing protein 124	3	19.5943	20.8875	20.3819	20.9007	20.2419	20.4013	20.4816	21.1228	19.5767	21.1654	20.3229	20.5339	TRUE	0.651351	0.132632	1.09629			19.0101	18.0318	17.9709	18.5355	20.4705	18.8038	19.7844	17.1187	19.6715	17.5301	20.37	18.895	TRUE	0.86806	0.0911926	1.06525
Q96I99	SUCLG2	SUCLG2	Succinate--CoA ligase [GDP-forming] subunit beta, mitochondrial (EC 6.2.1.4) (GTP-specific succinyl-CoA synthetase subunit beta) (G-SCS) (GTPSCS) (Succinyl-CoA synthetase beta-G chain) (SCS-betaG)	5	19.3988	20.8537	20.0571	19.2608	19.2126	19.7566	19.9858	20.055	18.7558	20.3677	20.2734	19.8876		0.8052	0.130956	1.09502			19.0817	19.5015	18.7025	18.4038	19.3825	19.0144	19.0248	19.4028	18.1508	18.9164	19.5076	19.0005	TRUE	0.9395	-0.0139286	0.990392
Q00839	HNRNPU	HNRNPU C1orf199 HNRPU SAFA U21.1	Heterogeneous nuclear ribonucleoprotein U (hnRNP U) (GRIP120) (Nuclear p120 ribonucleoprotein) (Scaffold-attachment factor A) (SAF-A) (p120) (pp120)	14	24.3857	24.1003	24.0681	24.468	23.5828	24.121	24.2624	24.5469	24.1165	24.4519	23.8807	24.2517	TRUE	0.281174	0.130727	1.09485			23.2415	23.1693	23.7328	23.2883	22.8052	23.2474	22.6099	22.6827	23.1213	22.8743	23.0713	22.8719	TRUE	0.0856123	-0.375541	0.770816
P04899	GNAI2	GNAI2 GNAI2B	Guanine nucleotide-binding protein G(i) subunit alpha-2 (Adenylate cyclase-inhibiting G alpha protein)	17	25.6431	25.615	25.4172	25.7304	25.2178	25.5247	25.7573	25.8153	25.6949	25.8971	25.1086	25.6547	TRUE	0.117943	0.129928	1.09424			24.1831	24.9209	24.1046	24.0753	23.9914	24.255	24.5036	25.2403	24.1846	24.4893	24.6086	24.6053	TRUE	0.0155952	0.350231	1.27476
Q8N3F0	MTURN	MTURN C7orf41	Maturin (Maturin neural progenitor differentiation regulator protein homolog) (Protein Ells1)	2	20.4804	20.4383	19.524	19.8262	19.6192	19.9776	20.4393	20.1996	19.6845	19.9299	20.2838	20.1074	TRUE	0.436846	0.129807	1.09415			17.9364	19.0217	18.5271	18.6319	18.4002	18.5035	17.8067	18.5028	20.0835	18.8212	19.0779	18.8584	TRUE	0.378397	0.354972	1.27896
P05198	EIF2S1	EIF2S1 EIF2A	Eukaryotic translation initiation factor 2 subunit 1 (Eukaryotic translation initiation factor 2 subunit alpha) (eIF-2-alpha) (eIF-2A) (eIF-2alpha)	5	22.609	23.2023	22.9227	22.8648	23.1948	22.9587	22.6977	23.1555	23.3174	22.9992	23.2713	23.0882	TRUE	0.149766	0.12949	1.09391			21.8257	21.8383	21.8549	21.5602	21.4026	21.6964	21.753	21.9492	21.5031	21.4751	21.4842	21.6329	TRUE	0.483425	-0.0634422	0.956978
P30101	PDIA3	PDIA3 ERP57 ERP60 GRP58	Protein disulfide-isomerase A3 (EC 5.3.4.1) (58 kDa glucose-regulated protein) (58 kDa microsomal protein) (p58) (Disulfide isomerase ER-60) (Endoplasmic reticulum resident protein 57) (ER protein 57) (ERp57) (Endoplasmic reticulum resident protein 60) (ER protein 60) (ERp60)	20	26.6174	27.0541	26.3229	26.7515	26.7453	26.6982	26.4828	26.8055	27.1667	26.8578	26.8176	26.8261	TRUE	0.539166	0.127853	1.09267			24.9687	25.0653	24.9525	24.7508	24.7507	24.8976	24.8305	25.1067	24.9005	24.85	24.8031	24.8981	TRUE	0.990938	0.000513458	1.00036
Q92506	HSD17B8	HSD17B8 FABGL HKE6 RING2 SDR30C1	Estradiol 17-beta-dehydrogenase 8 (EC 1.1.1.62) (17-beta-hydroxysteroid dehydrogenase 8) (17-beta-HSD 8) (3-ketoacyl-[acyl-carrier-protein] reductase alpha subunit) (KAR alpha subunit) (3-oxoacyl-[acyl-carrier-protein] reductase) (EC 1.1.1.-) (Protein Ke6) (Ke-6) (Really interesting new gene 2 protein) (Short chain dehydrogenase/reductase family 30C member 1) (Testosterone 17-beta-dehydrogenase 8…	6	21.4903	22.0955	21.6988	21.6182	21.5753	21.6956	21.6702	22.0665	22.2431	21.6605	21.472	21.8225	TRUE	0.329496	0.12683	1.09189			20.5963	20.983	20.4638	20.2998	20.4256	20.5537	21.0079	20.7752	21.2824	20.245	20.8404	20.8302	TRUE	0.206939	0.276458	1.21122
Q13642	FHL1	FHL1 SLIM1	Four and a half LIM domains protein 1 (FHL-1) (Skeletal muscle LIM-protein 1) (SLIM) (SLIM-1)	9	23.8786	24.3394	23.5602	24.1632	23.5337	23.895	24.2983	24.2315	24.1884	24.0977	23.2918	24.0215	TRUE	0.493568	0.12651	1.09165			23.3217	24.2654	23.3298	22.9153	23.0793	23.3823	23.3911	24.1682	23.1191	23.0461	23.3487	23.4146	TRUE	0.721539	0.0323582	1.02268
P22061	PCMT1	PCMT1	Protein-L-isoaspartate(D-aspartate) O-methyltransferase (PIMT) (EC 2.1.1.77) (L-isoaspartyl protein carboxyl methyltransferase) (Protein L-isoaspartyl/D-aspartyl methyltransferase) (Protein-beta-aspartate methyltransferase)	12	25.7009	26.2145	25.2245	26.2244	26.5166	25.9762	25.5818	25.9556	26.2489	25.9535	26.7734	26.1026	TRUE	0.631568	0.126433	1.09159			25.138	24.9313	25.0893	25.4582	25.4759	25.2185	25.2997	25.0033	25.5049	25.4233	25.2429	25.2948	TRUE	0.516567	0.0762871	1.0543
P00367	GLUD1	GLUD1 GLUD	Glutamate dehydrogenase 1, mitochondrial (GDH 1) (EC 1.4.1.3)	32	28.8931	28.345	28.3208	28.5571	28.4182	28.5068	28.8527	28.7057	28.7094	28.4898	28.4071	28.6329	TRUE	0.283853	0.126078	1.09132			27.7982	28.1675	27.6446	27.4191	28.3112	27.8681	28.1136	28.3475	28.1404	28.1298	28.5428	28.2548	TRUE	0.0163913	0.386704	1.3074
P46782	RPS5	RPS5	40S ribosomal protein S5 (Small ribosomal subunit protein uS7) [Cleaved into: 40S ribosomal protein S5, N-terminally processed]	5	21.7124	22.0909	21.4329	22.2559	20.6872	21.6359	21.6685	22.0541	21.9876	21.8188	21.274	21.7606	TRUE	0.559114	0.12475	1.09032			19.8661	20.7902	20.4734	20.6004	18.8647	20.119	17.484	20.4503	20.2398	20.5694	20.7522	19.8991	TRUE	0.761683	-0.219816	0.858675
P50502	ST13	ST13 AAG2 FAM10A1 HIP SNC6	Hsc70-interacting protein (Hip) (Aging-associated protein 2) (Progesterone receptor-associated p48 protein) (Protein FAM10A1) (Putative tumor suppressor ST13) (Renal carcinoma antigen NY-REN-33) (Suppression of tumorigenicity 13 protein)	7	23.8744	23.8598	22.6987	23.2128	24.0128	23.5317	24.2381	23.6263	23.042	23.3129	24.052	23.6542	TRUE	0.326886	0.122552	1.08866			23.2782	23.1856	23.1651	22.6783	23.121	23.0856	23.2293	23.286	23.2914	22.965	23.0184	23.158	TRUE	0.353004	0.0723667	1.05144
P51659	HSD17B4	HSD17B4 EDH17B4 SDR8C1	Peroxisomal multifunctional enzyme type 2 (MFE-2) (17-beta-hydroxysteroid dehydrogenase 4) (17-beta-HSD 4) (D-bifunctional protein) (DBP) (Multifunctional protein 2) (MPF-2) (Short chain dehydrogenase/reductase family 8C member 1) [Cleaved into: (3R)-hydroxyacyl-CoA dehydrogenase (EC 1.1.1.n12); Enoyl-CoA hydratase 2 (EC 4.2.1.107) (EC 4.2.1.119) (3-alpha,7-alpha,12-alpha-trihydroxy-5-beta-choles…	17	23.8038	24.0026	25.4611	23.9971	23.8089	24.2147	24.151	24.3248	24.5532	24.4258	24.2302	24.337	TRUE	0.660642	0.122296	1.08847			23.075	23.0556	23.625	22.9846	22.928	23.1336	23.4859	23.1734	23.8891	23.3176	23.0622	23.3856	TRUE	0.0111576	0.252002	1.19086
Q7Z6G3	NECAB2	NECAB2 EFCBP2	N-terminal EF-hand calcium-binding protein 2 (EF-hand calcium-binding protein 2) (Neuronal calcium-binding protein 2) (Synaptotagmin-interacting protein 2) (Stip-2)	8	22.9679	23.2785	22.1171	22.5478	23.3397	22.8502	23.2491	22.9591	22.9569	22.2332	23.463	22.9723	TRUE	0.600896	0.122048	1.08828			21.6305	20.9697	21.0777	22.366	22.4429	21.6973	21.2387	21.7881	20.4977	22.3113	22.7066	21.7085	TRUE	0.966296	0.0111568	1.00776
P04279	SEMG1	SEMG1 SEMG	Semenogelin-1 (Cancer/testis antigen 103) (Semenogelin I) (SGI) [Cleaved into: Alpha-inhibin-92; Alpha-inhibin-31; Seminal basic protein]	5	18.6787	19.3423	19.756	19.7684	19.3578	19.3806	20.0012	18.1307	20.387	19.1819	19.8109	19.5023		0.801163	0.121695	1.08801			18.9532	19.3274	18.3305	17.4368	19.2835	18.6663	21.3363	23.5426	18.8824	19.6771	19.3203	20.5517	TRUE	0.0638069	1.88542	3.6946
Q00577	PURA	PURA PUR1	Transcriptional activator protein Pur-alpha (Purine-rich single-stranded DNA-binding protein alpha)	5	24.299	23.1012	23.7021	23.3823	23.5482	23.6066	23.9138	24.1424	23.4611	23.9734	23.1475	23.7276	TRUE	0.701422	0.121093	1.08756			23.1921	22.9132	23.6195	23.6502	23.9234	23.4597	22.9843	22.9557	23.7118	23.3465	23.1585	23.2314	TRUE	0.210629	-0.228343	0.853615
P22234	PAICS	PAICS ADE2 AIRC PAIS	Multifunctional protein ADE2 [Includes: Phosphoribosylaminoimidazole-succinocarboxamide synthase (EC 6.3.2.6) (SAICAR synthetase); Phosphoribosylaminoimidazole carboxylase (EC 4.1.1.21) (AIR carboxylase) (AIRC)]	12	23.126	23.3309	22.6054	22.9779	22.6901	22.9461	23.6579	23.2339	22.8729	23.0301	22.5401	23.067	TRUE	0.390416	0.120943	1.08745			22.6678	22.9698	22.6278	22.7144	22.581	22.7122	22.7818	22.6579	22.6751	22.1838	22.2563	22.511	TRUE	0.17417	-0.201172	0.869844
P07737	PFN1	PFN1	Profilin-1 (Epididymis tissue protein Li 184a) (Profilin I)	10	24.316	24.5046	24.457	24.2707	24.5104	24.4118	24.7107	24.5136	24.5771	24.2513	24.6088	24.5323	TRUE	0.175669	0.120563	1.08716			23.7649	23.9875	23.7973	23.2166	23.7907	23.7114	24.2917	24.2242	23.9286	23.3868	23.6541	23.8971	TRUE	0.155647	0.185683	1.13736
P07099	EPHX1	EPHX1 EPHX EPOX	Epoxide hydrolase 1 (EC 3.3.2.9) (Epoxide hydratase) (Microsomal epoxide hydrolase) (mEH)	18	24.779	24.9355	24.6154	24.6357	24.4176	24.6766	24.9276	24.7253	25.1751	24.6177	24.5382	24.7968	TRUE	0.397501	0.120135	1.08684			24.0812	24.5631	23.3923	23.3061	23.9634	23.8612	23.9986	24.5841	23.4767	23.5591	23.7622	23.8761	TRUE	0.855426	0.0149075	1.01039
P30520	ADSS2	ADSS2 ADSS	Adenylosuccinate synthetase isozyme 2 (AMPSase 2) (AdSS 2) (EC 6.3.4.4) (Adenylosuccinate synthetase, acidic isozyme) (Adenylosuccinate synthetase, liver isozyme) (L-type adenylosuccinate synthetase) (IMP--aspartate ligase 2)	3	19.8834	19.5086	20.523	18.6108	20.1135	19.7279	20.5123	20.1474	19.4759	19.3365	19.7615	19.8467		0.752665	0.118867	1.08588			19.0083	19.139	18.5969	18.5568	19.2616	18.9125	19.1611	19.296	19.517	18.8179	19.316	19.2216	TRUE	0.119006	0.309075	1.23891
Q9BY11	PACSIN1	PACSIN1 KIAA1379	Protein kinase C and casein kinase substrate in neurons protein 1 (Syndapin-1)	23	26.6508	27.0345	25.9049	26.5999	26.6554	26.5691	26.2229	26.9168	26.7385	26.2636	27.294	26.6871	TRUE	0.672333	0.118058	1.08527			25.9788	25.4918	25.7336	26.1157	25.6015	25.7843	26.3965	26.1309	26.0718	26.0306	25.6905	26.0641	TRUE	0.0918321	0.279772	1.214
Q03154	ACY1	ACY1	Aminoacylase-1 (ACY-1) (EC 3.5.1.14) (N-acyl-L-amino-acid amidohydrolase)	5	19.3293	18.6628	18.5513	19.9053	20.4384	19.3774	18.7354	20.0406	20.2142	19.3425	19.1413	19.4948		0.85186	0.117364	1.08475			19.2155	20.1841	19.8075	18.0862	19.5564	19.3699	20.3204	19.9888	19.8784	19.6399	19.5591	19.8773	TRUE	0.21612	0.5074	1.42149
P31939	ATIC	ATIC PURH OK/SW-cl.86	Bifunctional purine biosynthesis protein PURH [Cleaved into: Bifunctional purine biosynthesis protein PURH, N-terminally processed] [Includes: Phosphoribosylaminoimidazolecarboxamide formyltransferase (EC 2.1.2.3) (5-aminoimidazole-4-carboxamide ribonucleotide formyltransferase) (AICAR transformylase); IMP cyclohydrolase (EC 3.5.4.10) (ATIC) (IMP synthase) (Inosinicase)]	15	23.6726	23.2459	23.5505	23.3964	22.9133	23.3557	23.6978	23.4731	23.3597	23.5138	23.318	23.4725	TRUE	0.305838	0.116745	1.08429			22.3856	22.7136	22.6155	22.527	22.5321	22.5548	22.5954	22.8664	22.5799	22.7814	22.6	22.6846	TRUE	0.0662922	0.129848	1.09418
P17844	DDX5	DDX5 G17P1 HELR HLR1	Probable ATP-dependent RNA helicase DDX5 (EC 3.6.4.13) (DEAD box protein 5) (RNA helicase p68)	10	19.4171	19.5065	19.8952	19.703	19.6288	19.6301	19.2401	18.9637	19.1566	21.1378	20.2298	19.7456		0.787907	0.115503	1.08335			16.2058	19.1026	19.4411	20.1292	18.8945	18.7546	17.1336	19.3212	19.0081	20.1454	19.4111	19.0039	TRUE	0.338351	0.249255	1.18859
Q9BQA1	WDR77	WDR77 MEP50 WD45 HKMT1069 Nbla10071	Methylosome protein 50 (MEP-50) (Androgen receptor cofactor p44) (WD repeat-containing protein 77) (p44/Mep50)	2	20.8541	18.7849	19.3161	19.6428	20.3433	19.7882	20.1097	20.2943	20.4692	19.1257	19.5189	19.9036	TRUE	0.829605	0.115328	1.08322			19.6778	19.8443	18.9323	18.8918	17.7997	19.0292	18.4641	17.9314	19.3523	19.3511	18.178	18.6554		0.494811	-0.373797	0.771749
O00483	NDUFA4	NDUFA4	Cytochrome c oxidase subunit NDUFA4 (Complex I-MLRQ) (CI-MLRQ) (NADH-ubiquinone oxidoreductase MLRQ subunit)	4	23.7563	24.4056	20.3343	23.8521	22.2616	22.922	22.867	23.8498	23.1162	23.5512	21.8008	23.037	TRUE	0.872755	0.114979	1.08296			21.8805	22.3829	22.5817	22.0686	22.3017	22.2431	21.8107	22.1576	21.8327	21.8585	21.9762	21.9271	TRUE	0.052343	-0.315973	0.803309
P22570	FDXR	FDXR ADXR	NADPH:adrenodoxin oxidoreductase, mitochondrial (AR) (Adrenodoxin reductase) (EC 1.18.1.6) (Ferredoxin--NADP(+) reductase) (Ferredoxin reductase)	6	21.9402	22.9717	21.2883	21.8343	22.1017	22.0273	22.216	22.5299	22.2861	21.9219	21.7543	22.1416	TRUE	0.680266	0.114396	1.08252			21.0245	21.135	21.8228	21.0835	21.2299	21.2591	21.068	20.8761	20.5682	21.0814	21.259	20.9705	TRUE	0.308766	-0.288601	0.818696
Q93050	ATP6V0A1	ATP6V0A1 ATP6N1 ATP6N1A VPP1	V-type proton ATPase 116 kDa subunit a isoform 1 (V-ATPase 116 kDa isoform a1) (Clathrin-coated vesicle/synaptic vesicle proton pump 116 kDa subunit) (Vacuolar adenosine triphosphatase subunit Ac116) (Vacuolar proton pump subunit 1) (Vacuolar proton translocating ATPase 116 kDa subunit a isoform 1)	25	27.5379	27.5558	27.0659	27.485	27.5216	27.4332	27.5746	27.5439	27.4739	27.5884	27.5555	27.5473	TRUE	0.206704	0.114038	1.08225			26.1183	25.8495	25.8898	26.566	26.3673	26.1582	26.0786	26.1009	26.0669	26.4556	26.2355	26.1875	TRUE	0.725934	0.0293026	1.02052
O43581	SYT7	SYT7 PCANAP7	Synaptotagmin-7 (IPCA-7) (Prostate cancer-associated protein 7) (Synaptotagmin VII) (SytVII)	3	21.2636	20.07	18.2707	21.7001	22.0216	20.6652	20.3472	20.327	21.7309	20.5845	20.9062	20.7792	TRUE	0.902624	0.113969	1.0822			20.9121	19.3775	20.4108	20.6231	18.503	19.9653	18.982	18.0294	18.4398	20.5418	20.2585	19.2503	TRUE	0.36826	-0.715005	0.609203
Q9HC38	GLOD4	GLOD4 C17orf25 CGI-150 My027	Glyoxalase domain-containing protein 4	8	21.7191	22.377	19.3915	21.5647	23.185	21.6475	21.9799	22.045	21.8974	19.5427	23.3392	21.7608	TRUE	0.883271	0.113377	1.08176			22.332	22.2833	21.9051	21.8266	21.9615	22.0617	21.9116	22.2525	21.9976	21.7938	22.3032	22.0517	TRUE	0.939289	-0.0099865	0.993102
O75368	SH3BGRL	SH3BGRL	SH3 domain-binding glutamic acid-rich-like protein	9	23.0185	22.9944	22.5376	22.6688	23.0666	22.8572	23.0474	23.134	22.6381	23.0672	22.9634	22.97	TRUE	0.243196	0.112848	1.08136			23.0205	23.0742	23.2595	22.6126	23.0408	23.0015	23.4185	23.01	23.4477	22.9807	22.7019	23.1118	TRUE	0.472646	0.110253	1.07942
P16930	FAH	FAH	Fumarylacetoacetase (FAA) (EC 3.7.1.2) (Beta-diketonase) (Fumarylacetoacetate hydrolase)	5	21.4153	21.4461	21.7217	21.2604	21.9698	21.5627	21.6111	21.5901	21.5595	21.5488	22.0662	21.6751	TRUE	0.211571	0.112458	1.08107			20.4296	21.2914	21.0079	20.3273	21.1546	20.8422	20.8711	21.3262	21.4077	20.3418	21.0974	21.0089	TRUE	0.187518	0.166705	1.12249
Q9H425	C1orf198	C1orf198	Uncharacterized protein C1orf198	4	19.048	19.5945	19.098	19.5295	19.9422	19.4424	19.2806	19.2302	19.3512	19.1819	20.7271	19.5542		0.63079	0.111754	1.08054			18.6408	20.4282	20.0703	19.5722	20.5114	19.8446	19.7254	19.8811	19.9068	19.6038	19.8459	19.7926	TRUE	0.875321	-0.0519802	0.964611
O95373	IPO7	IPO7 RANBP7	Importin-7 (Imp7) (Ran-binding protein 7) (RanBP7)	6	21.6979	21.9114	21.6634	22.2043	21.3999	21.7754	21.7627	21.9264	21.9435	21.8362	21.9668	21.8871	TRUE	0.509451	0.111747	1.08054			20.7166	20.6123	21.4985	20.8579	20.9274	20.9225	20.5759	20.5097	20.776	20.7853	20.408	20.611	TRUE	0.0757824	-0.311544	0.805779
P13987	CD59	CD59 MIC11 MIN1 MIN2 MIN3 MSK21	CD59 glycoprotein (1F5 antigen) (20 kDa homologous restriction factor) (HRF-20) (HRF20) (MAC-inhibitory protein) (MAC-IP) (MEM43 antigen) (Membrane attack complex inhibition factor) (MACIF) (Membrane inhibitor of reactive lysis) (MIRL) (Protectin) (CD antigen CD59)	4	24.2406	24.1608	24.0385	24.4388	23.7224	24.1202	24.57	24.2201	24.6927	24.0519	23.6233	24.2316	TRUE	0.566531	0.111378	1.08026			23.224	23.3689	23.0902	23.2161	22.9067	23.1612	23.0754	22.7316	23.1847	22.8144	22.8754	22.9363	TRUE	0.162757	-0.22489	0.85566
P25686	DNAJB2	DNAJB2 HSJ1 HSPF3	DnaJ homolog subfamily B member 2 (Heat shock 40 kDa protein 3) (Heat shock protein J1) (HSJ-1)	6	24.745	24.4939	24.2403	25.2344	25.2697	24.7967	24.7294	24.8152	24.9162	24.9046	25.1724	24.9076	TRUE	0.56211	0.110889	1.07989			23.7269	23.0544	23.9978	23.8779	24.0147	23.7344	24.0008	23.2741	24.0315	23.7062	23.8027	23.7631	TRUE	0.785515	0.0287155	1.0201
O60256	PRPSAP2	PRPSAP2	Phosphoribosyl pyrophosphate synthase-associated protein 2 (PRPP synthase-associated protein 2) (41 kDa phosphoribosypyrophosphate synthetase-associated protein) (PAP41)	5	22.7809	23.1871	22.321	23.0467	22.2323	22.7136	22.5534	22.8518	23.2396	22.6788	22.7955	22.8238	TRUE	0.698266	0.110247	1.07941			21.423	21.5746	21.4788	21.5083	21.7541	21.5478	21.6513	21.8123	21.5122	21.3127	21.0628	21.4703	TRUE	0.676692	-0.0775002	0.947698
Q8N2G8	GHDC	GHDC D11LGP1E LGP1	GH3 domain-containing protein	2	20.1254	20.3259	19.9931	19.7792	20.3594	20.1166	20.0838	20.694	20.4371	19.4383	20.475	20.2256	TRUE	0.485961	0.10904	1.07851			19.0155	18.7269	19.2883	19.1393	19.2491	19.0838	19.4206	18.7497	19.5391	19.1575	18.8384	19.1411	TRUE	0.699396	0.057225	1.04046
P32004	L1CAM	L1CAM CAML1 MIC5	Neural cell adhesion molecule L1 (N-CAM-L1) (NCAM-L1) (CD antigen CD171)	21	24.557	25.234	24.4529	25.0451	25.2829	24.9144	24.5035	24.958	25.1681	24.8713	25.6113	25.0224	TRUE	0.586781	0.108034	1.07776			24.4532	22.8824	24.7704	25.0705	24.2529	24.2859	24.3116	23.5215	24.7091	24.8059	24.0218	24.274	TRUE	0.946525	-0.0118896	0.991793
Q96RQ9	IL4I1	IL4I1 FIG1 UNQ636/PRO1265	L-amino-acid oxidase (LAAO) (LAO) (EC 1.4.3.2) (Interleukin-4-induced protein 1) (IL4-induced protein 1) (Protein Fig-1) (hFIG1)	4	19.2234	19.3183	19.0877	20.6417	19.1026	19.4747	19.0882	19.3225	20.1238	20.3067	19.0721	19.5827	TRUE	0.675551	0.107917	1.07767			19.8994	18.0424	18.4663	19.6613	18.6904	18.952	18.8895	18.2377	19.5888	17.6485	18.2311	18.5191		0.460887	-0.43286	0.740792
P51452	DUSP3	DUSP3 VHR	Dual specificity protein phosphatase 3 (EC 3.1.3.16) (EC 3.1.3.48) (Dual specificity protein phosphatase VHR) (Vaccinia H1-related phosphatase) (VHR)	4	21.9126	22.7875	22.0297	22.5544	22.5695	22.3707	22.2411	22.525	22.1306	22.2625	23.2315	22.4782	TRUE	0.584061	0.107436	1.07731			21.6082	21.8753	21.0718	21.5729	21.5742	21.5405	21.5932	21.6723	20.975	21.5001	21.3698	21.4221	TRUE	0.0335849	-0.11841	0.921202
O75935	DCTN3	DCTN3 DCTN22	Dynactin subunit 3 (Dynactin complex subunit 22 kDa subunit) (p22)	6	23.438	24.2799	23.421	23.7185	23.708	23.7131	23.6629	23.8106	24.014	23.8641	23.7498	23.8203	TRUE	0.565744	0.107202	1.07714			22.8245	22.1419	22.4273	22.5884	22.4398	22.4844	22.3567	22.4005	22.7595	22.7321	22.4483	22.5394	TRUE	0.717511	0.0550396	1.03889
P08237	PFKM	PFKM PFKX	ATP-dependent 6-phosphofructokinase, muscle type (ATP-PFK) (PFK-M) (EC 2.7.1.11) (6-phosphofructokinase type A) (Phosphofructo-1-kinase isozyme A) (PFK-A) (Phosphohexokinase)	28	26.3712	26.3489	26.0592	26.5069	26.3397	26.3252	26.2783	26.5048	26.6338	26.442	26.3006	26.4319	TRUE	0.440897	0.106737	1.07679			25.1451	25.4013	25.1553	25.4704	25.2807	25.2906	25.5717	25.7388	25.575	25.6515	25.371	25.5816	TRUE	0.0121387	0.291037	1.22352
Q6YP21	KYAT3	KYAT3 CCBL2 KAT3	Kynurenine--oxoglutarate transaminase 3 (EC 2.6.1.7) (Cysteine-S-conjugate beta-lyase 2) (EC 4.4.1.13) (Kynurenine aminotransferase 3) (Kynurenine aminotransferase III) (KATIII) (Kynurenine--glyoxylate transaminase) (EC 2.6.1.63) (Kynurenine--oxoglutarate transaminase III)	6	20.4668	21.3299	19.6232	20.7594	20.776	20.5911	20.6389	21.0236	20.4972	20.5333	20.7953	20.6976	TRUE	0.63848	0.106585	1.07668			20.3729	20.139	19.3421	20.2536	18.5417	19.7299	19.7791	20.0876	19.5825	19.7748	19.3068	19.7062	TRUE	0.928296	-0.0237049	0.983703
P63208	SKP1	SKP1 EMC19 OCP2 SKP1A TCEB1L	S-phase kinase-associated protein 1 (Cyclin-A/CDK2-associated protein p19) (p19A) (Organ of Corti protein 2) (OCP-2) (Organ of Corti protein II) (OCP-II) (RNA polymerase II elongation factor-like protein) (SIII) (Transcription elongation factor B polypeptide 1-like) (p19skp1)	7	24.2434	23.3523	23.3062	24.0652	23.8137	23.7562	24.4057	23.9336	23.4334	23.8333	23.7078	23.8627	TRUE	0.487216	0.106554	1.07665			23.2506	23.4418	23.155	22.9611	22.9618	23.154	23.0769	23.0733	23.217	23.3538	23.1651	23.1772	TRUE	0.871537	0.0232063	1.01622
P30048	PRDX3	PRDX3 AOP1	Thioredoxin-dependent peroxide reductase, mitochondrial (EC 1.11.1.15) (Antioxidant protein 1) (AOP-1) (HBC189) (Peroxiredoxin III) (Prx-III) (Peroxiredoxin-3) (Protein MER5 homolog)	7	25.6604	26.0274	25.8148	25.9583	26.6642	26.025	25.2803	25.9413	26.3693	26.2225	26.8363	26.13	TRUE	0.544674	0.10492	1.07543			25.2818	25.4228	25.1718	25.2695	25.527	25.3346	25.4731	25.4174	25.5204	25.6286	25.3196	25.4718	TRUE	0.275071	0.137216	1.09978
Q99766	DMAC2L	DMAC2L ATP5S ATPW	ATP synthase subunit s, mitochondrial (ATP synthase-coupling factor B) (FB) (Distal membrane arm assembly complex 2-like protein) (Mitochondrial ATP synthase regulatory component factor B)	4	19.7857	18.6236	19.7199	20.3722	18.7664	19.4536	19.861	19.5277	19.1722	19.7868	19.4424	19.558		0.749709	0.10446	1.07509			19.1465	19.8544	19.1283	19.2674	18.8874	19.2568	18.8994	19.993	19.0305	19.4688	19.3838	19.3551	TRUE	0.485807	0.0983047	1.07051
Q8WVC6	DCAKD	DCAKD	Dephospho-CoA kinase domain-containing protein	2	20.6035	19.5684	20.0471	19.4966	19.9647	19.9361	20.165	20.3657	20.2318	19.8762	19.564	20.0405	TRUE	0.680744	0.104443	1.07508			18.7109	18.6369	17.5577	19.4548	18.7464	18.6213	17.7986	18.217	17.9137	18.7458	17.763	18.0876		0.0930126	-0.533751	0.690756
Q13586	STIM1	STIM1 GOK	Stromal interaction molecule 1	3	21.2893	21.5363	19.3037	21.4649	19.4569	20.6102	19.3198	21.931	20.1933	21.0771	21.0516	20.7146	TRUE	0.872695	0.104332	1.075			19.9075	17.7068	18.3815	17.7085	20.2674	18.7943	17.7669	17.3817	18.8475	18.5868	18.3283	18.1822		0.375896	-0.612107	0.65424
Q3YEC7	RABL6	RABL6 C9orf86 PARF	Rab-like protein 6 (GTP-binding protein Parf) (Partner of ARF) (Rab-like protein 1) (RBEL1)	5	22.191	18.9999	19.2135	19.8163	21.2084	20.2858	19.2731	21.0729	21.1514	19.4933	20.957	20.3895	TRUE	0.915041	0.103729	1.07455			20.5188	20.413	19.1129	20.9418	20.7041	20.3381	20.0652	18.5541	17.982	21.2494	20.7414	19.7184	TRUE	0.191484	-0.619713	0.6508
Q13765	NACA	NACA HSD48	Nascent polypeptide-associated complex subunit alpha (NAC-alpha) (Alpha-NAC) (allergen Hom s 2)	4	20.8584	21.3537	21.7391	19.6234	19.423	20.5995	20.9484	20.979	21.1922	21.0459	19.3499	20.7031	TRUE	0.780907	0.103541	1.07441			17.7594	18.4102	17.8526	17.4992	17.7039	17.845	19.0714	18.022	19.2864	20.3824	18.2932	19.0111		0.0961171	1.16604	2.24394
P36871	PGM1	PGM1	Phosphoglucomutase-1 (PGM 1) (EC 5.4.2.2) (Glucose phosphomutase 1)	19	24.153	24.4749	23.6195	23.9271	25.1479	24.2645	24.23	24.2541	24.0566	23.8828	25.4163	24.368	TRUE	0.42039	0.103496	1.07437			24.4934	24.4209	24.8548	23.5091	24.3496	24.3255	24.2852	24.5202	25.0726	23.7418	23.9326	24.3105	TRUE	0.911906	-0.0150749	0.989605
P63151	PPP2R2A	PPP2R2A	Serine/threonine-protein phosphatase 2A 55 kDa regulatory subunit B alpha isoform (PP2A subunit B isoform B55-alpha) (PP2A subunit B isoform PR55-alpha) (PP2A subunit B isoform R2-alpha) (PP2A subunit B isoform alpha)	11	23.6604	24.4438	23.6483	23.9756	23.6018	23.866	23.7363	23.8757	24.2212	23.9874	24.0267	23.9695	TRUE	0.628817	0.103471	1.07436			22.4634	22.7699	22.5449	22.6197	22.918	22.6632	22.7009	22.7972	22.5365	22.8418	22.479	22.6711	TRUE	0.951694	0.00788155	1.00548
P05413	FABP3	FABP3 FABP11 MDGI	Fatty acid-binding protein, heart (Fatty acid-binding protein 3) (Heart-type fatty acid-binding protein) (H-FABP) (Mammary-derived growth inhibitor) (MDGI) (Muscle fatty acid-binding protein) (M-FABP)	8	24.9839	25.19	23.713	24.9669	26.0207	24.9749	24.6862	25.0269	24.4298	25.0135	26.2353	25.0783	TRUE	0.589521	0.103421	1.07432			24.601	23.7353	24.009	24.2549	24.3139	24.1828	24.5247	23.5736	24.0751	24.0325	24.245	24.0902	TRUE	0.130496	-0.0926586	0.937793
O94819	KBTBD11	KBTBD11 CMLAP KIAA0711 KLHDC7C	Kelch repeat and BTB domain-containing protein 11 (Chronic myelogenous leukemia-associated protein) (Kelch domain-containing protein 7B)	29	26.367	26.6733	25.9124	26.7275	25.9548	26.327	26.3493	26.7157	26.4353	26.8109	25.8409	26.4304	TRUE	0.400406	0.103416	1.07431			25.1568	25.6813	25.151	25.2809	25.3902	25.3321	25.2492	25.2773	25.1657	25.2781	25.1987	25.2338	TRUE	0.334183	-0.098254	0.934163
Q06203	PPAT	PPAT GPAT	Amidophosphoribosyltransferase (ATase) (EC 2.4.2.14) (Glutamine phosphoribosylpyrophosphate amidotransferase) (GPAT)	3	20.2693	19.9975	19.4112	19.3952	18.2966	19.474	19.6318	19.4922	19.466	19.5642	19.7324	19.5773	TRUE	0.792506	0.103346	1.07426			19.1465	19.0754	19.4355	18.1427	18.9592	18.9518	18.4366	17.0789	19.0373	17.658	18.3207	18.1063	TRUE	0.0447279	-0.84554	0.556502	TRUE
P03915	MT-ND5	MT-ND5 MTND5 NADH5 ND5	NADH-ubiquinone oxidoreductase chain 5 (EC 7.1.1.2) (NADH dehydrogenase subunit 5)	2	20.4609	18.0794	19.6638	20.526	19.3864	19.6233	19.6609	19.8041	20.0994	20.3327	18.7348	19.7264	TRUE	0.833344	0.103057	1.07405			19.3054	19.2479	19.3568	19.2883	19.4049	19.3207	19.0787	19.3705	19.3161	19.561	19.3892	19.3431	TRUE	0.802054	0.0224213	1.01566
Q9BT78	COPS4	COPS4 CSN4	COP9 signalosome complex subunit 4 (SGN4) (Signalosome subunit 4) (JAB1-containing signalosome subunit 4)	8	23.2526	23.0569	22.6847	23.0249	23.3434	23.0725	22.8236	23.3283	23.566	23.0093	23.1503	23.1755	TRUE	0.671841	0.103001	1.07401			22.0189	21.9323	22.1461	22.3464	22.318	22.1523	22.2383	21.674	22.2835	22.0987	22.0255	22.064	TRUE	0.466682	-0.0883282	0.940612
Q14195	DPYSL3	DPYSL3 CRMP4 DRP3 ULIP ULIP1	Dihydropyrimidinase-related protein 3 (DRP-3) (Collapsin response mediator protein 4) (CRMP-4) (Unc-33-like phosphoprotein 1) (ULIP-1)	23	25.7918	25.9026	25.335	25.6568	25.4811	25.6335	26.1154	25.9607	25.6447	25.6928	25.2683	25.7364	TRUE	0.358979	0.102915	1.07394			24.7923	25.6976	24.3131	24.6022	24.9	24.861	25.0067	25.654	24.863	24.6459	25.0726	25.0484	TRUE	0.138775	0.187416	1.13872
Q9ULC3	RAB23	RAB23 HSPC137	Ras-related protein Rab-23	3	21.4437	21.8457	21.5778	21.938	21.8393	21.7289	21.8198	21.8991	21.514	22.1968	21.7249	21.8309	TRUE	0.338338	0.102029	1.07328			20.6454	21.0992	19.9196	20.5775	20.7702	20.6024	20.2048	20.5255	20.2199	20.4672	20.2556	20.3346	TRUE	0.175886	-0.267788	0.830592
P11498	PC	PC	Pyruvate carboxylase, mitochondrial (EC 6.4.1.1) (Pyruvic carboxylase) (PCB)	33	25.5725	25.2129	25.2457	25.6261	25.0748	25.3464	25.5301	25.3883	25.5215	25.6641	25.1381	25.4484	TRUE	0.140979	0.102014	1.07327			24.0623	24.5699	24.0591	24.0082	23.8723	24.1144	24.1273	24.4799	24.1787	24.3852	23.9778	24.2298	TRUE	0.199883	0.115422	1.08329
Q99250	SCN2A	SCN2A NAC2 SCN2A1 SCN2A2	Sodium channel protein type 2 subunit alpha (HBSC II) (Sodium channel protein brain II subunit alpha) (Sodium channel protein type II subunit alpha) (Voltage-gated sodium channel subunit alpha Nav1.2)	13	23.4287	24.5984	23.2318	24.5325	24.6814	24.0945	23.7271	24.2544	24.0529	24.2495	24.6979	24.1964	TRUE	0.658074	0.101818	1.07313			22.9225	22.1008	22.8219	23.0102	22.5356	22.6782	22.5611	22.3002	22.769	23.1612	22.6575	22.6898	TRUE	0.915292	0.0116089	1.00808
P62328	TMSB4X	TMSB4X TB4X THYB4 TMSB4	Thymosin beta-4 (T beta-4) (Fx) [Cleaved into: Hematopoietic system regulatory peptide (Seraspenide)]	9	24.9142	25.6359	24.534	25.1313	25.8716	25.2174	25.0649	25.0679	25.5158	24.7983	26.1422	25.3178	TRUE	0.727463	0.100433	1.0721			25.6399	25.1013	25.4131	25.0922	25.5478	25.3589	25.2782	24.7184	25.5074	24.9446	24.8001	25.0497	TRUE	0.0910535	-0.309139	0.807123
Q00796	SORD	SORD	Sorbitol dehydrogenase (SDH) (EC 1.1.1.-) ((R,R)-butanediol dehydrogenase) (EC 1.1.1.4) (L-iditol 2-dehydrogenase) (EC 1.1.1.14) (Polyol dehydrogenase) (Ribitol dehydrogenase) (RDH) (EC 1.1.1.56) (Xylitol dehydrogenase) (XDH) (EC 1.1.1.9)	4	23.086	22.3594	22.5221	23.0352	22.5078	22.7021	23.0072	23.2414	22.6579	23.0285	22.0764	22.8023	TRUE	0.667785	0.100174	1.0719			21.9946	22.5122	21.7315	21.652	22.2393	22.0259	21.5226	21.8461	21.6054	21.3743	21.6281	21.5953	TRUE	0.0132209	-0.430599	0.741954
P60900	PSMA6	PSMA6 PROS27	Proteasome subunit alpha type-6 (EC 3.4.25.1) (27 kDa prosomal protein) (PROS-27) (p27K) (Macropain iota chain) (Multicatalytic endopeptidase complex iota chain) (Proteasome iota chain)	7	22.7813	22.7439	24.1637	22.5955	22.3813	22.9331	23.1157	22.8774	23.1658	22.4063	23.5949	23.032	TRUE	0.796898	0.0988895	1.07095			22.4792	22.2674	22.3748	22.0523	22.2755	22.2898	22.0993	21.9811	22.298	22.1059	22.0945	22.1158	TRUE	0.0846194	-0.174038	0.886358
P18206	VCL	VCL	Vinculin (Metavinculin) (MV)	25	24.6729	25.1507	25.6794	24.8519	23.749	24.8208	24.9911	24.826	25.2999	25.2382	24.2409	24.9192	TRUE	0.625139	0.0984123	1.07059			23.2354	23.7679	22.9274	22.8377	22.8288	23.1194	23.2107	23.6661	22.8549	22.7889	22.9027	23.0847	TRUE	0.311144	-0.0347767	0.976183
P17302	GJA1	GJA1 GJAL	Gap junction alpha-1 protein (Connexin-43) (Cx43) (Gap junction 43 kDa heart protein)	10	24.5503	25.0029	22.7253	25.1668	22.0008	23.8892	24.9776	24.9538	23.815	25.4621	20.7281	23.9873	TRUE	0.813486	0.0980915	1.07036			22.554	24.2314	22.7262	22.1758	23.0728	22.952	23.0203	23.7472	23.3598	22.4768	23.2839	23.1776	TRUE	0.304322	0.225563	1.16923
P17931	LGALS3	LGALS3 MAC2	Galectin-3 (Gal-3) (35 kDa lectin) (Carbohydrate-binding protein 35) (CBP 35) (Galactose-specific lectin 3) (Galactoside-binding protein) (GALBP) (IgE-binding protein) (L-31) (Laminin-binding protein) (Lectin L-29) (Mac-2 antigen)	6	23.6865	23.0261	25.1352	22.9252	23.1134	23.5773	24.3316	23.7534	23.4764	23.6359	23.1779	23.675	TRUE	0.840694	0.0977791	1.07012			22.2272	22.5882	22.5689	22.1638	21.1696	22.1436	22.603	22.7542	22.6172	21.9816	21.9671	22.3846	TRUE	0.219634	0.241037	1.18184
P09972	ALDOC	ALDOC ALDC	Fructose-bisphosphate aldolase C (EC 4.1.2.13) (Brain-type aldolase)	25	28.4223	28.8755	27.8118	28.2255	29.6479	28.5966	28.275	28.7383	28.2835	28.4497	29.7241	28.6941	TRUE	0.449609	0.0975449	1.06995			28.4857	28.3766	28.5035	28.1454	28.4969	28.4016	28.6652	28.1323	28.6935	28.2717	28.131	28.3788	TRUE	0.855112	-0.0228386	0.984294
Q9Y3F4	STRAP	STRAP MAWD UNRIP	Serine-threonine kinase receptor-associated protein (MAP activator with WD repeats) (UNR-interacting protein) (WD-40 repeat protein PT-WD)	7	22.5276	22.979	22.3343	22.4367	22.3495	22.5254	22.6504	22.627	22.8904	22.5736	22.3718	22.6226	TRUE	0.539094	0.0972195	1.06971			21.3834	21.601	21.0795	21.2513	21.7361	21.4103	21.2081	21.6338	21.4383	21.546	21.7532	21.5159	TRUE	0.341694	0.105611	1.07595
Q3SXM5	HSDL1	HSDL1 SDR12C3	Inactive hydroxysteroid dehydrogenase-like protein 1 (Short chain dehydrogenase/reductase family 12C member 3)	5	22.224	21.3765	21.8453	22.1753	22.1527	21.9547	21.6158	22.2396	21.2176	22.7678	22.4166	22.0515	TRUE	0.768331	0.0967285	1.06935			21.053	21.0317	21.1443	21.4031	21.4011	21.2067	21.1738	20.8378	20.9933	20.8825	21.1461	21.0067	TRUE	0.123511	-0.199966	0.870571
Q8N1B4	VPS52	VPS52 SACM2L	Vacuolar protein sorting-associated protein 52 homolog (SAC2 suppressor of actin mutations 2-like protein)	8	21.8106	20.714	21.3097	22.1315	21.7131	21.5358	21.7266	21.6035	21.4695	21.9314	21.4313	21.6325	TRUE	0.671596	0.0966961	1.06932			20.9373	20.6021	20.5314	20.8724	20.8223	20.7531	20.4042	20.6118	20.2392	21.0241	20.9296	20.6418	TRUE	0.442801	-0.111298	0.925755
P13010	XRCC5	XRCC5 G22P2	X-ray repair cross-complementing protein 5 (EC 3.6.4.-) (86 kDa subunit of Ku antigen) (ATP-dependent DNA helicase 2 subunit 2) (ATP-dependent DNA helicase II 80 kDa subunit) (CTC box-binding factor 85 kDa subunit) (CTC85) (CTCBF) (DNA repair protein XRCC5) (Ku80) (Ku86) (Lupus Ku autoantigen protein p86) (Nuclear factor IV) (Thyroid-lupus autoantigen) (TLAA) (X-ray repair complementing defective…	4	18.6511	18.9824	20.8488	20.4613	20.8824	19.9652	21.0324	19.3301	19.7872	20.3827	19.7759	20.0617		0.886888	0.0964508	1.06914			19.0219	19.4749	17.3337	19.0791	18.7131	18.7245	19.16	18.2456	19.3432	19.1353	18.3657	18.85	TRUE	0.824469	0.125436	1.09084
O60869	EDF1	EDF1	Endothelial differentiation-related factor 1 (EDF-1) (Multiprotein-bridging factor 1) (MBF1)	4	21.6421	21.6749	19.2853	22.0415	20.5449	21.0378	21.4628	22.0264	20.4989	21.2503	20.4311	21.1339	TRUE	0.787301	0.0961437	1.06891			20.2844	18.4939	20.7217	20.2023	20.8701	20.1145	20.1408	19.9476	19.2074	20.348	21.1601	20.1608	TRUE	0.92711	0.0463013	1.03261
Q9UDT6	CLIP2	CLIP2 CYLN2 KIAA0291 WBSCR3 WBSCR4 WSCR4	CAP-Gly domain-containing linker protein 2 (Cytoplasmic linker protein 115) (CLIP-115) (Cytoplasmic linker protein 2) (Williams-Beuren syndrome chromosomal region 3 protein) (Williams-Beuren syndrome chromosomal region 4 protein)	17	23.7431	23.7432	23.4299	23.7322	23.8329	23.6963	23.5653	23.775	24.0167	23.8878	23.7165	23.7923	TRUE	0.518601	0.0959679	1.06878			22.3938	22.2266	22.6117	22.8171	22.4872	22.5073	22.1943	22.1843	22.1126	22.504	22.1645	22.2319	TRUE	0.0217664	-0.275363	0.826242
Q15008	PSMD6	PSMD6 KIAA0107 PFAAP4	26S proteasome non-ATPase regulatory subunit 6 (26S proteasome regulatory subunit RPN7) (26S proteasome regulatory subunit S10) (Breast cancer-associated protein SGA-113M) (Phosphonoformate immuno-associated protein 4) (Proteasome regulatory particle subunit p44S10) (p42A)	7	22.2186	22.2858	22.7688	22.073	22.2766	22.3246	22.3096	22.6241	22.4554	22.2278	22.4841	22.4202	TRUE	0.433782	0.0956451	1.06854			21.8554	21.3551	21.3058	21.2851	21.2162	21.4035	21.5899	21.1136	21.4041	21.2732	21.1172	21.2996	TRUE	0.204939	-0.103942	0.930487
Q12765	SCRN1	SCRN1 KIAA0193	Secernin-1	17	26.7117	26.7161	26.2756	26.3541	26.7927	26.57	26.8092	26.7132	26.6366	26.3116	26.8551	26.6651	TRUE	0.250477	0.0950962	1.06814			25.5481	25.8031	25.877	25.1632	25.4647	25.5712	25.5102	25.8971	25.9495	25.4303	25.8507	25.7276	TRUE	0.10675	0.156358	1.11447
O95831	AIFM1	AIFM1 AIF PDCD8	Apoptosis-inducing factor 1, mitochondrial (EC 1.6.99.-) (Programmed cell death protein 8)	7	22.0721	22.0384	21.7083	22.2655	22.5216	22.1212	22.1872	22.1412	22.1034	22.0766	22.5722	22.2161	TRUE	0.365214	0.0949276	1.06801			21.3478	21.3364	21.6573	21.3843	21.4278	21.4307	21.2703	21.4366	21.4448	21.4172	21.2952	21.3728	TRUE	0.361035	-0.0578766	0.960677
Q8N135	LGI4	LGI4 LGIL3 UNQ6515/PRO21485	Leucine-rich repeat LGI family member 4 (LGI1-like protein 3) (Leucine-rich glioma-inactivated protein 4)	2	18.3719	19.8241	19.9509	19.0475	19.15	19.2689	18.6475	19.0848	20.125	19.827	19.1329	19.3634		0.720892	0.0945564	1.06774			17.5511	18.2244	20.1177	19.7955	18.1792	18.7736	19.7356	19.5472	19.9953	19.7912	17.7049	19.3548	TRUE	0.312664	0.581274	1.49617
O43759	SYNGR1	SYNGR1	Synaptogyrin-1	3	23.9436	24.8805	23.6259	24.7105	24.4961	24.3313	23.9115	24.7649	24.5441	24.5314	24.3758	24.4255	TRUE	0.673085	0.0942158	1.06748			23.4239	22.9403	22.9149	23.5558	24.0869	23.3844	23.2468	23.0073	23.2717	23.4051	23.3539	23.257	TRUE	0.516331	-0.127392	0.915485
Q04760	GLO1	GLO1	Lactoylglutathione lyase (EC 4.4.1.5) (Aldoketomutase) (Glyoxalase I) (Glx I) (Ketone-aldehyde mutase) (Methylglyoxalase) (S-D-lactoylglutathione methylglyoxal lyase)	8	24.6433	24.6834	24.1157	23.864	25.1615	24.4936	24.4165	24.5987	24.2541	24.3232	25.346	24.5877	TRUE	0.469714	0.0941143	1.06741			24.6327	24.4973	24.4089	23.9062	24.1065	24.3103	24.565	24.6226	24.4978	24.1704	24.2206	24.4153	TRUE	0.118162	0.104948	1.07546
Q96CX2	KCTD12	KCTD12 C13orf2 KIAA1778 PFET1	BTB/POZ domain-containing protein KCTD12 (Pfetin) (Predominantly fetal expressed T1 domain)	15	24.5186	24.677	24.4014	24.5252	24.1064	24.4457	24.3421	24.6088	24.7723	24.7162	24.2562	24.5391	TRUE	0.390631	0.0934155	1.06689			23.3419	23.6533	22.6079	22.5088	23.4623	23.1148	23.392	23.3923	22.7768	22.7865	23.105	23.0905	TRUE	0.852561	-0.0243107	0.98329
P62136	PPP1CA	PPP1CA PPP1A	Serine/threonine-protein phosphatase PP1-alpha catalytic subunit (PP-1A) (EC 3.1.3.16)	13	20.8166	20.1042	20.9984	20.632	21.2251	20.7553	20.5791	20.6566	20.69	21.3474	20.9693	20.8485	TRUE	0.696854	0.0932049	1.06674			18.6378	19.9521	20.1097	20.2751	19.6973	19.7344	19.6667	18.065	19.5917	19.7676	19.6604	19.3503	TRUE	0.459258	-0.3841	0.766257
Q9BTW9	TBCD	TBCD KIAA0988 SSD1 TFCD PP1096	Tubulin-specific chaperone D (Beta-tubulin cofactor D) (tfcD) (SSD-1) (Tubulin-folding cofactor D)	11	23.2055	23.3336	22.7031	23.4836	22.7471	23.0946	22.7301	23.7209	23.5198	23.3404	22.6248	23.1872	TRUE	0.704811	0.0926224	1.06631			21.6767	21.751	21.7847	22.2553	22.2681	21.9471	21.5959	21.8796	21.7379	21.9786	21.8631	21.811	TRUE	0.217373	-0.136123	0.909961
P28161	GSTM2	GSTM2 GST4	Glutathione S-transferase Mu 2 (EC 2.5.1.18) (GST class-mu 2) (GSTM2-2)	14	24.9883	25.2504	24.7181	24.8745	24.935	24.9533	25.1603	25.0418	25.4491	24.9715	24.6042	25.0454	TRUE	0.644516	0.0921227	1.06594			24.1733	25.3259	24.5478	23.2782	23.9704	24.2591	23.9992	25.0403	24.4834	23.4219	24.0964	24.2082	TRUE	0.575282	-0.0509003	0.965334
P22059	OSBP	OSBP OSBP1	Oxysterol-binding protein 1	4	20.5953	19.5495	19.3975	20.8381	19.5275	19.9816	20.8489	20.7395	19.3138	20.7869	18.6777	20.0734	TRUE	0.794339	0.0917778	1.06568			19.2358	19.6093	19.367	19.9143	20.1853	19.6623	19.6088	18.8602	19.5051	19.8056	19.9873	19.5534	TRUE	0.594397	-0.108933	0.927273
P30046	DDT	DDT	D-dopachrome decarboxylase (EC 4.1.1.84) (D-dopachrome tautomerase) (Phenylpyruvate tautomerase II)	6	22.8141	21.2576	21.6655	21.8048	22.5073	22.0099	22.4708	22.3015	21.6791	21.985	22.0705	22.1014	TRUE	0.745924	0.0915142	1.06549			22.1308	22.2904	21.7904	21.5874	21.672	21.8942	22.5555	22.2255	22.2602	21.9971	22.501	22.3079	TRUE	0.0437816	0.413671	1.33207
Q96GW7	BCAN	BCAN BEHAB CSPG7 UNQ2525/PRO6018	Brevican core protein (Brain-enriched hyaluronan-binding protein) (BEHAB) (Chondroitin sulfate proteoglycan 7)	25	27.3611	27.9171	27.1596	27.7987	27.4639	27.5401	27.3463	27.7196	27.3568	27.73	28.005	27.6315	TRUE	0.517946	0.0914822	1.06546			26.6859	26.7269	26.4975	26.1987	26.5882	26.5394	27.1377	26.2526	26.6427	26.3863	26.726	26.629	TRUE	0.588073	0.089595	1.06407
P46940	IQGAP1	IQGAP1 KIAA0051	Ras GTPase-activating-like protein IQGAP1 (p195)	7	21.7131	21.1425	22.6689	20.9444	19.1892	21.1316	22.0274	21.5553	21.4714	21.8041	19.2505	21.2218	TRUE	0.807787	0.0901279	1.06446			18.6206	18.5883	18.2404	17.3367	17.7041	18.098	20.6079	18.4152	19	18.0432	19.3113	19.0755		0.0610382	0.977512	1.96907
Q9NRW1	RAB6B	RAB6B	Ras-related protein Rab-6B	10	22.8288	23.8572	22.9285	23.6162	23.5453	23.3552	23.0228	23.6633	23.3359	23.755	23.4481	23.445	TRUE	0.449049	0.0898163	1.06423			22.5897	21.996	22.2608	22.0042	22.673	22.3047	22.2427	21.8606	22.3244	21.9226	22.0897	22.088	TRUE	0.12727	-0.216727	0.860516
P43004	SLC1A2	SLC1A2 EAAT2 GLT1	Excitatory amino acid transporter 2 (Glutamate/aspartate transporter II) (Sodium-dependent glutamate/aspartate transporter 2) (Solute carrier family 1 member 2)	15	27.4727	28.5514	26.3837	27.9112	27.3475	27.5333	27.2395	28.1573	27.6209	27.7616	27.3338	27.6226	TRUE	0.776057	0.0893242	1.06387			26.4864	26.1928	26.8344	27.1167	27.1648	26.759	26.8292	26.7914	27.2894	26.9447	27.2306	27.0171	TRUE	0.136016	0.258028	1.19584
P06753	TPM3	TPM3	Tropomyosin alpha-3 chain (Gamma-tropomyosin) (Tropomyosin-3) (Tropomyosin-5) (hTM5)	22	25.6155	26.0569	25.9429	25.8838	25.7646	25.8527	25.4802	26.0135	26.1177	26.1809	25.9161	25.9417	TRUE	0.319057	0.0889431	1.06359			24.6937	25.2336	24.5867	24.7886	24.7876	24.8181	24.9663	24.994	24.9095	24.5527	24.7227	24.829	TRUE	0.932234	0.0109943	1.00765
Q99627	COPS8	COPS8 CSN8	COP9 signalosome complex subunit 8 (SGN8) (Signalosome subunit 8) (COP9 homolog) (hCOP9) (JAB1-containing signalosome subunit 8)	4	22.5087	21.8729	22.0072	22.2678	22.0158	22.1345	22.2827	22.3582	22.2592	22.1885	22.0261	22.2229	TRUE	0.521383	0.0884232	1.06321			20.1685	20.6774	18.2754	20.6489	20.7907	20.1122	20.9439	20.5325	20.6671	20.9749	20.6333	20.7503	TRUE	0.24693	0.63816	1.55634
P19338	NCL	NCL	Nucleolin (Protein C23)	13	23.9017	23.9481	23.8203	23.9024	23.6955	23.8536	23.6996	24.2703	24.1577	23.8581	23.7194	23.941	TRUE	0.453918	0.0874599	1.0625			23.064	23.3362	23.7243	23.3331	22.7854	23.2486	23.105	22.9561	23.5309	23.2216	23.0457	23.1718	TRUE	0.517236	-0.0767742	0.948175
Q13098	GPS1	GPS1 COPS1 CSN1	COP9 signalosome complex subunit 1 (SGN1) (Signalosome subunit 1) (G protein pathway suppressor 1) (GPS-1) (JAB1-containing signalosome subunit 1) (Protein MFH)	10	23.549	24.0429	22.6705	24.0869	22.4129	23.3525	23.1529	23.3504	23.9067	23.7653	23.0242	23.4399	TRUE	0.820401	0.0874519	1.06249			22.0084	22.2714	22.1216	22.334	22.4695	22.241	22.1486	22.2797	22.2838	22.4263	22.2576	22.2792	TRUE	0.603438	0.0382225	1.02685
P60709	ACTB	ACTB	Actin, cytoplasmic 1 (Beta-actin) [Cleaved into: Actin, cytoplasmic 1, N-terminally processed]	33	32.8276	32.6907	32.5667	32.8633	32.8689	32.7635	32.767	32.8849	32.7641	33.0473	32.7725	32.8472	TRUE	0.27657	0.083712	1.05974			31.8034	31.8112	31.5486	31.7502	31.938	31.7703	31.8743	31.9166	31.7424	31.9196	32.0548	31.9015	TRUE	0.00411809	0.131287	1.09527
P23368	ME2	ME2	NAD-dependent malic enzyme, mitochondrial (NAD-ME) (EC 1.1.1.38) (Malic enzyme 2)	9	23.2412	23.3454	22.8744	23.4837	22.9013	23.1692	23.3123	23.0965	23.5171	23.4157	22.9226	23.2529	TRUE	0.606861	0.0836582	1.0597			21.8852	22.3431	21.5583	21.5831	22.0671	21.8874	22.1857	22.3266	21.6599	21.964	21.7122	21.9697	TRUE	0.561077	0.0823151	1.05872
O60831	PRAF2	PRAF2 JM4	PRA1 family protein 2	2	21.7845	20.4041	21.5186	21.6586	19.7593	21.025	21.73	22.2791	19.5086	22.4073	19.6135	21.1077	TRUE	0.90297	0.0826538	1.05896			20.5874	20.9603	19.435	21.2365	21.3858	20.721	19.2456	20.9594	18.7508	21.085	20.7884	20.1659	TRUE	0.0777258	-0.555138	0.680592
P45974	USP5	USP5 ISOT	Ubiquitin carboxyl-terminal hydrolase 5 (EC 3.4.19.12) (Deubiquitinating enzyme 5) (Isopeptidase T) (Ubiquitin thioesterase 5) (Ubiquitin-specific-processing protease 5)	19	25.0248	25.3069	24.9499	25.3699	25.251	25.1805	25.1549	25.1763	25.339	25.1697	25.4743	25.2628	TRUE	0.49534	0.0823338	1.05873			24.2777	24.1768	24.077	24.1528	24.3135	24.1995	24.196	24.1937	24.4266	24.18	24.2331	24.2459	TRUE	0.590133	0.0463459	1.03265
P62899	RPL31	RPL31	60S ribosomal protein L31 (Large ribosomal subunit protein eL31)	2	22.2669	22.1867	22.5488	22.4656	22.7315	22.4399	22.043	22.3473	22.8699	22.7438	22.6045	22.5217	TRUE	0.495862	0.0818066	1.05834			21.0844	21.0004	21.8289	21.4481	21.3762	21.3476	17.7195	20.8825	18.4541	21.2816	21.1304	19.8936	TRUE	0.136665	-1.45398	0.365012
Q15149	PLEC	PLEC PLEC1	Plectin (PCN) (PLTN) (Hemidesmosomal protein 1) (HD1) (Plectin-1)	282	30.1743	30.2151	30.3515	30.2169	29.1026	30.0121	30.2425	30.1446	30.3749	30.588	29.1188	30.0938	TRUE	0.341761	0.0816746	1.05825			28.606	29.9265	28.3404	28.0649	28.8344	28.7544	28.7689	29.5416	28.6321	28.2649	28.7089	28.7833	TRUE	0.828418	0.0288635	1.02021
Q9UH62	ARMCX3	ARMCX3 ALEX3 BM-017 UNQ2517/PRO6007	Armadillo repeat-containing X-linked protein 3 (ARM protein lost in epithelial cancers on chromosome X 3) (Protein ALEX3)	2	18.7131	20.7146	20.6384	20.5497	20.1728	20.1577	20.3415	20.4743	20.5727	20.928	18.8779	20.2389	TRUE	0.872502	0.0811344	1.05785			19.0605	18.9285	19.521	19.4045	19.4449	19.2719	19.9359	19.4306	19.473	20.1833	19.4033	19.6852	TRUE	0.103649	0.413312	1.33174
Q14697	GANAB	GANAB G2AN KIAA0088	Neutral alpha-glucosidase AB (EC 3.2.1.207) (Alpha-glucosidase 2) (Glucosidase II subunit alpha)	20	24.6719	24.612	25.0024	24.428	24.6055	24.664	24.598	24.8886	24.6471	24.6806	24.9104	24.745	TRUE	0.563812	0.0810024	1.05775			23.8626	23.7833	23.7606	23.9427	23.6286	23.7955	23.6976	23.8276	23.7316	23.6786	23.7553	23.7382	TRUE	0.461256	-0.0573833	0.961006
P56192	MARS1	MARS1 MARS	Methionine--tRNA ligase, cytoplasmic (EC 6.1.1.10) (Methionyl-tRNA synthetase) (MetRS)	5	21.0182	20.7556	20.8555	21.1895	20.2559	20.815	21.065	21.007	21.0489	21.0662	20.292	20.8958	TRUE	0.286561	0.080862	1.05765			18.9174	20.1106	19.5396	19.9299	19.3719	19.5739	18.1845	19.9587	19.2804	20.4075	20.0828	19.5828	TRUE	0.974366	0.00891609	1.0062
Q8N1G4	LRRC47	LRRC47 KIAA1185	Leucine-rich repeat-containing protein 47	16	24.359	24.2846	23.8534	24.2827	23.4671	24.0494	24.1165	24.3138	24.0767	24.2691	23.8746	24.1301	TRUE	0.504501	0.0807663	1.05758			22.5366	22.6068	23.168	23.3948	23.2185	22.9849	22.6319	22.4925	23.2311	23.5759	22.8884	22.964	TRUE	0.829162	-0.0209606	0.985576
O43813	LANCL1	LANCL1 GPR69A	Glutathione S-transferase LANCL1 (EC 2.5.1.18) (40 kDa erythrocyte membrane protein) (p40) (LanC-like protein 1)	9	25.651	25.8849	25.5515	25.8868	25.1707	25.629	25.5887	25.7839	25.8376	25.6598	25.678	25.7096	TRUE	0.586324	0.0806252	1.05748			24.7909	24.8787	24.7713	24.3354	24.7822	24.7117	24.8003	24.8072	24.6207	24.3468	24.7245	24.6599	TRUE	0.158367	-0.0518173	0.96472
Q02818	NUCB1	NUCB1 NUC	Nucleobindin-1 (CALNUC)	6	21.6703	21.8864	21.6992	21.8296	19.5625	21.3296	21.2799	20.7403	22.3699	22.5323	20.116	21.4077	TRUE	0.84169	0.0780746	1.05561			20.1747	17.7726	20.5087	21.0511	20.6574	20.0329	20.3578	20.175	18.3778	20.8643	20.5464	20.0643	TRUE	0.967406	0.0313328	1.02196
Q16537	PPP2R5E	PPP2R5E	Serine/threonine-protein phosphatase 2A 56 kDa regulatory subunit epsilon isoform (PP2A B subunit isoform B'-epsilon) (PP2A B subunit isoform B56-epsilon) (PP2A B subunit isoform PR61-epsilon) (PP2A B subunit isoform R5-epsilon)	9	21.7393	21.6621	20.7239	21.4992	21.8145	21.4878	21.9427	21.5077	21.4089	21.4044	21.5647	21.5657	TRUE	0.670047	0.0778702	1.05546			20.9149	20.7512	20.6318	20.646	20.9882	20.7864	20.7018	20.8275	20.141	20.9785	20.7806	20.6859	TRUE	0.514198	-0.100507	0.932705
P80723	BASP1	BASP1 NAP22	Brain acid soluble protein 1 (22 kDa neuronal tissue-enriched acidic protein) (Neuronal axonal membrane protein NAP-22)	19	27.8632	28.3394	27.0675	28.3324	29.5944	28.2394	27.4152	27.7956	28.6572	27.8375	29.8781	28.3167	TRUE	0.858706	0.0773205	1.05506			29.0295	28.3004	28.7651	28.4406	28.2384	28.5548	28.5653	28.3684	29.0201	28.2055	27.6785	28.3676	TRUE	0.29279	-0.187238	0.878286
P62879	GNB2	GNB2	Guanine nucleotide-binding protein G(I)/G(S)/G(T) subunit beta-2 (G protein subunit beta-2) (Transducin beta chain 2)	16	26.497	24.9863	26.1797	25.6857	26.4509	25.9599	26.1481	26.1213	25.9862	26.0372	25.893	26.0372	TRUE	0.812094	0.0772678	1.05502			25.2253	25.4244	24.9641	25.4005	24.8612	25.1751	24.9309	25.5075	25.0111	25.5353	25.3113	25.2592	TRUE	0.517209	0.0841309	1.06005
P07203	GPX1	GPX1	Glutathione peroxidase 1 (GPx-1) (GSHPx-1) (EC 1.11.1.9) (Cellular glutathione peroxidase)	8	22.7205	22.4792	22.404	22.4678	22.6564	22.5456	22.7864	22.6534	22.308	22.4496	22.9154	22.6225	TRUE	0.294884	0.0769604	1.05479			21.8891	21.5405	22.4295	22.1978	21.9562	22.0026	22.2904	21.7139	22.2451	22.2373	22.5282	22.203	TRUE	0.206076	0.200362	1.14899
Q9Y277	VDAC3	VDAC3	Voltage-dependent anion-selective channel protein 3 (VDAC-3) (hVDAC3) (Outer mitochondrial membrane protein porin 3)	7	23.2464	22.793	22.5967	22.9236	23.7816	23.0682	23.4936	23.1384	22.2365	22.858	23.9984	23.145	TRUE	0.583505	0.0767429	1.05463			23.8594	23.6134	22.9748	22.7126	22.7468	23.1814	23.738	23.3725	23.2495	22.8339	22.8094	23.2006	TRUE	0.842414	0.0192604	1.01344
P49189	ALDH9A1	ALDH9A1 ALDH4 ALDH7 ALDH9	4-trimethylaminobutyraldehyde dehydrogenase (TMABA-DH) (TMABALDH) (EC 1.2.1.47) (Aldehyde dehydrogenase E3 isozyme) (Aldehyde dehydrogenase family 9 member A1) (EC 1.2.1.3) (Gamma-aminobutyraldehyde dehydrogenase) (EC 1.2.1.19) (R-aminobutyraldehyde dehydrogenase) [Cleaved into: 4-trimethylaminobutyraldehyde dehydrogenase, N-terminally processed]	17	25.4577	25.0495	25.642	25.2889	25.7684	25.4413	25.6824	25.328	25.3608	25.349	25.8684	25.5177	TRUE	0.478639	0.0764011	1.05438			24.7406	25.5205	24.8421	24.2541	24.8504	24.8415	25.0239	25.3555	24.7575	24.358	25.0237	24.9037	TRUE	0.4929	0.0621914	1.04405
Q09666	AHNAK	AHNAK PM227	Neuroblast differentiation-associated protein AHNAK (Desmoyokin)	72	25.1054	25.2035	26.6934	25.0901	24.3846	25.2954	26.0957	25.0931	25.5895	25.5829	24.4961	25.3715	TRUE	0.838176	0.0760742	1.05415			24.2773	25.2436	23.8811	23.6994	24.2503	24.2704	24.3934	25.1108	24.1445	23.4007	24.2182	24.2535	TRUE	0.870886	-0.016856	0.988384
P01112	HRAS	HRAS HRAS1	GTPase HRas (H-Ras-1) (Ha-Ras) (Transforming protein p21) (c-H-ras) (p21ras) [Cleaved into: GTPase HRas, N-terminally processed]	4	21.2338	20.424	20.7782	20.9809	21.2295	20.9293	21.1189	20.9806	20.7259	20.7701	21.4284	21.0048	TRUE	0.613504	0.07551	1.05373			20.5653	20.3056	20.2681	20.2239	20.4453	20.3616	20.2986	20.0308	20.3205	20.2681	20.4152	20.2666	TRUE	0.264129	-0.0949959	0.936275
P61353	RPL27	RPL27	60S ribosomal protein L27 (Large ribosomal subunit protein eL27)	2	21.284	21.4071	19.4607	21.7829	21.8101	21.149	21.3115	21.2977	21.034	21.1981	21.2792	21.2241	TRUE	0.857609	0.0751167	1.05345			21.1381	21.0748	21.3992	20.7834	20.3408	20.9472	20.7762	20.8209	20.8196	20.9033	20.6701	20.798	TRUE	0.416241	-0.149235	0.901728
P47755	CAPZA2	CAPZA2	F-actin-capping protein subunit alpha-2 (CapZ alpha-2)	11	24.9178	24.9452	24.1842	24.7857	25.0018	24.7669	24.9476	24.908	24.48	24.9266	24.9323	24.8389	TRUE	0.340453	0.0719502	1.05114			23.9447	24.1452	23.717	23.7993	24.2244	23.9661	23.9495	24.1602	23.7746	23.9901	24.127	24.0003	TRUE	0.505231	0.0341484	1.02395
P61163	ACTR1A	ACTR1A CTRN1	Alpha-centractin (Centractin) (ARP1) (Actin-RPV) (Centrosome-associated actin homolog)	11	24.5375	23.4576	24.0813	24.0048	23.957	24.0076	24.1625	24.4724	23.9373	24.2639	23.5612	24.0795	TRUE	0.798716	0.0718201	1.05104			23.2574	23.5745	23.3087	22.8793	22.8902	23.182	23.4681	23.5622	23.3399	23.3899	23.3797	23.428	TRUE	0.0896801	0.245956	1.18588
Q6PIU2	NCEH1	NCEH1 AADACL1 KIAA1363	Neutral cholesterol ester hydrolase 1 (NCEH) (EC 3.1.1.-) (Arylacetamide deacetylase-like 1)	5	22.8829	22.5048	22.4689	22.7238	23.2328	22.7626	22.5322	23.0051	22.6963	22.5797	23.3588	22.8344	TRUE	0.652254	0.0717743	1.05101			22.0656	21.8323	22.5321	22.4665	21.9037	22.1601	22.0057	21.9069	22.4275	22.5859	21.9063	22.1664	TRUE	0.884555	0.0063942	1.00444
Q15907	RAB11B	RAB11B YPT3	Ras-related protein Rab-11B (GTP-binding protein YPT3)	11	24.8459	25.0433	24.5495	25.1689	25.1441	24.9503	24.6606	25.0718	24.8886	25.1905	25.2982	25.0219	TRUE	0.453151	0.0715912	1.05088			23.8794	23.9385	24.171	23.937	23.9297	23.9711	23.9897	24.0008	23.8841	23.8943	23.9998	23.9538	TRUE	0.821297	-0.0173546	0.988043
P40227	CCT6A	CCT6A CCT6 CCTZ	T-complex protein 1 subunit zeta (TCP-1-zeta) (Acute morphine dependence-related protein 2) (CCT-zeta-1) (HTR3) (Tcp20)	16	25.2266	25.3971	24.9811	25.2094	25.4915	25.2611	25.1943	25.5691	25.4798	25.0854	25.3325	25.3322	TRUE	0.589715	0.0710663	1.05049			24.0825	24.3407	24.0073	24.1018	24.3275	24.1719	24.2375	23.9562	24.2215	24.096	24.0405	24.1103	TRUE	0.630683	-0.0616238	0.958185
P29966	MARCKS	MARCKS MACS PRKCSL	Myristoylated alanine-rich C-kinase substrate (MARCKS) (Protein kinase C substrate, 80 kDa protein, light chain) (80K-L protein) (PKCSL)	6	25.1951	25.9604	24.8889	25.3659	26.3699	25.556	24.9124	25.1045	26.1651	25.5779	26.3738	25.6267	TRUE	0.850113	0.0706997	1.05023			24.4971	24.6881	25.0145	24.262	24.9354	24.6794	24.6961	25.0759	25.7149	24.727	24.5746	24.9577	TRUE	0.194705	0.278278	1.21275
P01019	AGT	AGT SERPINA8	Angiotensinogen (Serpin A8) [Cleaved into: Angiotensin-1 (Angiotensin 1-10) (Angiotensin I) (Ang I); Angiotensin-2 (Angiotensin 1-8) (Angiotensin II) (Ang II); Angiotensin-3 (Angiotensin 2-8) (Angiotensin III) (Ang III) (Des-Asp[1]-angiotensin II); Angiotensin-4 (Angiotensin 3-8) (Angiotensin IV) (Ang IV); Angiotensin 1-9; Angiotensin 1-7; Angiotensin 1-5; Angiotensin 1-4]	2	19.2821	19.4273	19.4089	18.12	20.1714	19.2819	18.7436	19.5571	19.6053	19.1769	19.6759	19.3518		0.821688	0.0698074	1.04958			19.3175	20.3984	17.7312	17.5267	18.9964	18.794	19.0613	17.5433	18.9911	19.2631	18.4592	18.6636	TRUE	0.87945	-0.13041	0.913572
Q9Y2Q0	ATP8A1	ATP8A1 ATPIA	Phospholipid-transporting ATPase IA (EC 7.6.2.1) (ATPase class I type 8A member 1) (Chromaffin granule ATPase II) (P4-ATPase flippase complex alpha subunit ATP8A1)	27	25.8027	25.5581	25.4819	26.0946	25.5123	25.6899	25.8706	25.7895	25.6999	26.0407	25.3951	25.7592	TRUE	0.379341	0.0692451	1.04917			24.5249	24.7211	23.6599	23.8673	24.3904	24.2327	24.6809	24.7424	24.241	24.153	24.6836	24.5002	TRUE	0.0449917	0.26745	1.20368
Q7L099	RUFY3	RUFY3 KIAA0871	Protein RUFY3 (RUN and FYVE domain-containing protein 3) (Rap2-interacting protein x) (RIPx) (Single axon-regulated protein) (Singar)	17	24.9228	25.6942	24.7358	25.3434	24.9784	25.1349	25.0762	24.9447	25.3276	25.4618	25.2078	25.2036	TRUE	0.771534	0.0687317	1.04879			24.15	24.0637	24.0367	23.8873	24.1668	24.0609	24.1216	23.8786	24.1358	24.001	23.9827	24.0239	TRUE	0.60063	-0.0369701	0.9747
O14980	XPO1	XPO1 CRM1	Exportin-1 (Exp1) (Chromosome region maintenance 1 protein homolog)	7	21.8537	21.7774	21.5418	21.8114	21.6462	21.7261	22.3805	21.5571	21.6694	21.4552	21.9098	21.7944	TRUE	0.692301	0.0683136	1.04849			20.7243	21.4991	20.9043	20.738	20.9018	20.9535	20.8575	21.0986	20.9846	20.811	20.8311	20.9166	TRUE	0.722539	-0.0369526	0.974712
P00738	HP	HP	Haptoglobin (Zonulin) [Cleaved into: Haptoglobin alpha chain; Haptoglobin beta chain]	15	22.8052	24.0651	23.9625	23.8772	24.0399	23.75	23.1311	24.0024	23.9631	23.5615	24.4297	23.8176	TRUE	0.631055	0.0675781	1.04796			23.267	23.4895	21.4399	21.2192	23.2881	22.5407	23.4997	23.3639	21.5868	21.3086	23.5121	22.6542	TRUE	0.157256	0.113472	1.08183
Q9UI15	TAGLN3	TAGLN3 NP25	Transgelin-3 (Neuronal protein 22) (NP22) (Neuronal protein NP25)	18	26.1597	26.5329	25.4336	26.3604	26.0826	26.1138	26.2987	26.3084	26.2273	26.1137	25.9587	26.1814	TRUE	0.745277	0.0675568	1.04794			25.2098	24.6895	24.7954	25.4336	25.2288	25.0714	25.1725	24.7283	25.0346	25.3282	25.2289	25.0985	TRUE	0.66557	0.0270802	1.01895
Q6ZMI0	PPP1R21	PPP1R21 CCDC128 KLRAQ1	Protein phosphatase 1 regulatory subunit 21 (Coiled-coil domain-containing protein 128) (KLRAQ motif-containing protein 1)	3	20.1069	19.2498	20.9153	19.7127	18.948	19.7865	19.6873	20.0021	20.7645	19.2574	19.55	19.8523		0.810232	0.0657097	1.0466			19.1288	18.8344	19.1007	19.4385	18.6565	19.0318	17.6902	19.0103	18.7171	19.3246	19.1784	18.7841	TRUE	0.499116	-0.247671	0.842255
P40939	HADHA	HADHA HADH	Trifunctional enzyme subunit alpha, mitochondrial (78 kDa gastrin-binding protein) (Monolysocardiolipin acyltransferase) (EC 2.3.1.-) (TP-alpha) [Includes: Long-chain enoyl-CoA hydratase (EC 4.2.1.17); Long chain 3-hydroxyacyl-CoA dehydrogenase (EC 1.1.1.211)]	28	24.994	25.4046	24.9582	24.9671	24.6821	25.0012	25.2433	24.9482	25.2091	25.1345	24.7969	25.0664	TRUE	0.64952	0.065189	1.04622			24.2528	25.3887	24.1775	23.5088	24.549	24.3754	24.5066	25.2936	24.46	24.3994	24.8149	24.6949	TRUE	0.115094	0.319546	1.24794
P29400	COL4A5	COL4A5	Collagen alpha-5(IV) chain	4	23.4675	23.368	22.6538	23.1099	23.3477	23.1894	23.2945	23.6596	23.1806	23.6779	22.4592	23.2544	TRUE	0.823179	0.0649681	1.04606			23.0337	22.7208	23.0801	22.8942	21.2656	22.5989	22.5308	22.3888	22.5358	21.6359	22.2077	22.2598	TRUE	0.396556	-0.339071	0.79055
O75822	EIF3J	EIF3J EIF3S1 PRO0391	Eukaryotic translation initiation factor 3 subunit J (eIF3j) (Eukaryotic translation initiation factor 3 subunit 1) (eIF-3-alpha) (eIF3 p35)	5	20.6163	21.2016	19.6214	21.4568	21.393	20.8578	20.697	20.99	19.8215	21.4695	21.6359	20.9228	TRUE	0.464461	0.0649647	1.04606			20.0325	20.0976	19.7787	19.8887	19.8743	19.9344	20.2013	19.9816	20.3635	20.1177	20.0714	20.1471	TRUE	0.129207	0.21274	1.15889
P84095	RHOG	RHOG ARHG	Rho-related GTP-binding protein RhoG	6	21.0622	21.3528	21.9574	21.9338	19.2705	21.1153	21.3915	21.5733	21.9505	22.1668	18.8183	21.1801	TRUE	0.668876	0.0647598	1.04591			19.6361	20.208	20.1461	18.8419	19.694	19.7052	19.351	20.256	19.8099	18.9011	19.6476	19.5931	TRUE	0.250703	-0.11207	0.925259
Q96FE5	LINGO1	LINGO1 LERN1 LRRN6A UNQ201/PRO227	Leucine-rich repeat and immunoglobulin-like domain-containing nogo receptor-interacting protein 1 (Leucine-rich repeat and immunoglobulin domain-containing protein 1) (Leucine-rich repeat neuronal protein 1) (Leucine-rich repeat neuronal protein 6A)	2	21.2028	21.2653	20.821	21.2484	21.5662	21.2207	21.2859	21.2538	20.6768	21.4046	21.8014	21.2845	TRUE	0.388627	0.0637924	1.04521			19.9618	19.2389	20.7884	20.96	20.5692	20.3037	20.3671	18.9504	20.6325	20.9765	20.4906	20.2834	TRUE	0.871316	-0.0202892	0.986035
Q9UQB3	CTNND2	CTNND2 NPRAP	Catenin delta-2 (Delta-catenin) (GT24) (Neural plakophilin-related ARM-repeat protein) (NPRAP) (Neurojungin)	23	25.1583	25.8803	24.9805	25.7053	24.91	25.3269	25.118	25.601	25.7126	25.7722	24.7489	25.3905	TRUE	0.73711	0.0636604	1.04511			23.5416	23.6454	23.4806	23.3512	23.8304	23.5698	23.4517	23.3435	23.3411	23.3173	23.4963	23.39	TRUE	0.0381397	-0.179839	0.882802
Q01518	CAP1	CAP1 CAP	Adenylyl cyclase-associated protein 1 (CAP 1)	17	24.1615	24.5824	24.4105	24.6344	24.3829	24.4344	24.6519	24.6175	24.4525	24.5814	24.1868	24.498	TRUE	0.609385	0.0636524	1.04511			23.6017	23.9021	23.2641	23.3636	23.4699	23.5203	23.5888	23.8595	23.4396	23.3897	23.6548	23.5865	TRUE	0.238801	0.0661724	1.04694
P54750	PDE1A	PDE1A	Calcium/calmodulin-dependent 3',5'-cyclic nucleotide phosphodiesterase 1A (Cam-PDE 1A) (EC 3.1.4.17) (61 kDa Cam-PDE) (hCam-1)	8	23.3367	23.5904	22.3057	23.4791	23.4548	23.2333	23.2846	23.3695	23.4153	23.1807	23.2322	23.2965	TRUE	0.823271	0.0631107	1.04472			22.5489	21.6141	22.1196	22.3311	22.4056	22.2038	22.0913	22.0094	22.2228	22.4214	22.4203	22.233	TRUE	0.842783	0.0291794	1.02043
P62917	RPL8	RPL8	60S ribosomal protein L8 (Large ribosomal subunit protein uL2)	4	23.3711	23.9551	23.3932	23.9764	23.6431	23.6678	23.1824	23.9012	24.133	24.0115	23.4238	23.7304	TRUE	0.739144	0.0626244	1.04436			22.6553	22.5953	23.1889	23.2802	22.7484	22.8936	22.5362	22.1763	22.9139	22.6834	22.1653	22.495	TRUE	0.0120558	-0.398606	0.758591
Q9BTE1	DCTN5	DCTN5	Dynactin subunit 5 (Dynactin subunit p25)	2	19.3929	20.3568	19.2342	19.5336	19.664	19.6363	19.6729	19.3273	19.3736	19.9323	20.1874	19.6987	TRUE	0.834679	0.0624176	1.04421			18.6828	18.4215	18.7836	18.8548	18.5536	18.6593	18.9725	18.9038	18.903	18.5573	18.544	18.7761	TRUE	0.427461	0.116882	1.08439
Q2NKQ1	SGSM1	SGSM1 KIAA1941 RUTBC2	Small G protein signaling modulator 1 (RUN and TBC1 domain-containing protein 2)	2	20.2179	20.9186	20.3169	20.7192	19.6339	20.3613	20.537	20.9984	20.7508	20.8758	18.9558	20.4236	TRUE	0.765542	0.0622887	1.04412			18.0776	19.0114	19.9673	19.684	19.3349	19.2151	18.4852	17.2461	19.5005	17.9793	17.4097	18.1241		0.0750595	-1.09091	0.469466
P07195	LDHB	LDHB	L-lactate dehydrogenase B chain (LDH-B) (EC 1.1.1.27) (LDH heart subunit) (LDH-H) (Renal carcinoma antigen NY-REN-46)	19	27.9226	28.3145	27.207	27.5951	29.1775	28.0434	28.1399	27.8337	27.9136	27.4393	29.2011	28.1055	TRUE	0.769071	0.062175	1.04404			28.2841	27.9802	28.2364	27.6939	27.7324	27.9854	28.1797	28.2483	28.2524	27.726	27.8853	28.0584	TRUE	0.314968	0.0729744	1.05188
P53999	SUB1	SUB1 PC4 RPO2TC1	Activated RNA polymerase II transcriptional coactivator p15 (Positive cofactor 4) (PC4) (SUB1 homolog) (p14)	4	21.3	22.0386	22.2669	22.2311	18.7766	21.3227	22.1026	22.1797	21.7183	22.1642	18.7592	21.3848	TRUE	0.78968	0.0621643	1.04403			20.2087	20.5846	18.7552	18.9615	20.3565	19.7733	18.607	20.4596	20.4269	20.5296	20.9493	20.1945	TRUE	0.524101	0.421145	1.33899
Q4G0F5	VPS26B	VPS26B	Vacuolar protein sorting-associated protein 26B (Vesicle protein sorting 26B)	9	23.7309	24.0409	23.8755	23.6887	23.6642	23.8	23.8195	23.7788	23.8356	24.3996	23.4764	23.862	TRUE	0.738649	0.0619324	1.04386			22.7458	22.6213	22.2123	22.0121	22.5104	22.4204	22.4599	22.7517	22.4875	22.4677	22.8999	22.6133	TRUE	0.217224	0.192915	1.14307
Q9H0Q3	FXYD6	FXYD6 UNQ521/PRO1056	FXYD domain-containing ion transport regulator 6 (Phosphohippolin)	2	22.3363	21.4437	21.4626	22.5811	19.9134	21.5474	22.1077	22.2814	22.4429	22.0299	19.1818	21.6087	TRUE	0.87168	0.0612907	1.0434			20.4424	20.0807	20.5539	21.3896	21.1862	20.7306	20.4576	20.3873	20.2654	20.8815	21.0099	20.6004	TRUE	0.399444	-0.130206	0.913701
Q16623	STX1A	STX1A STX1	Syntaxin-1A (Neuron-specific antigen HPC-1)	22	27.0187	27.4368	26.6745	27.4309	27.667	27.2456	26.8125	27.6004	27.3407	27.0534	27.724	27.3062	TRUE	0.75185	0.0606163	1.04291			26.2348	25.2187	26.2764	27.1033	26.4232	26.2513	26.2015	25.9046	26.2924	27.1049	26.3948	26.3796	TRUE	0.410135	0.128357	1.09305
Q07157	TJP1	TJP1 ZO1	Tight junction protein ZO-1 (Tight junction protein 1) (Zona occludens protein 1) (Zonula occludens protein 1)	13	23.9674	24.1618	24.1617	24.2654	23.2716	23.9656	24.0423	24.3088	24.1448	24.7864	22.8447	24.0254	TRUE	0.714237	0.0598438	1.04235			22.1698	23.2168	23.0442	22.5423	22.9801	22.7906	22.5374	22.8912	18.6262	22.763	23.0161	21.9667	TRUE	0.414583	-0.823895	0.564915
O43390	HNRNPR	HNRNPR HNRPR	Heterogeneous nuclear ribonucleoprotein R (hnRNP R)	9	23.8352	23.8178	23.8501	23.5191	23.4264	23.6897	23.828	23.9364	23.4773	23.556	23.9458	23.7487	TRUE	0.700341	0.0590057	1.04175			22.799	22.6864	23.5603	23.2825	22.3448	22.9346	22.5963	22.1818	23.0139	23.0322	22.4803	22.6609	TRUE	0.0893962	-0.27372	0.827184
O60749	SNX2	SNX2 TRG9	Sorting nexin-2 (Transformation-related gene 9 protein) (TRG-9)	6	22.4722	22.7406	21.8375	22.2457	21.2077	22.1007	22.2436	22.0673	22.5017	22.3509	21.6329	22.1593	TRUE	0.816851	0.058559	1.04143			20.8785	20.5974	21.3627	21.0433	20.5272	20.8818	20.7896	20.9612	20.6311	20.8093	20.514	20.7411	TRUE	0.472506	-0.140773	0.907033
Q9NZB2	FAM120A	FAM120A C9orf10 KIAA0183 OSSA	Constitutive coactivator of PPAR-gamma-like protein 1 (Oxidative stress-associated Src activator) (Protein FAM120A)	2	20.5995	19.2012	19.4485	20.6863	18.6501	19.7171	19.8141	18.9748	19.6917	20.1396	20.2573	19.7755	TRUE	0.897069	0.0583931	1.04131			17.2351	16.7589	18.5991	17.8645	18.4488	17.7813	18.8518	19.4895	18.8201	17.6118	19.0837	18.7714		0.136848	0.990091	1.98631
Q9C0C9	UBE2O	UBE2O KIAA1734	(E3-independent) E2 ubiquitin-conjugating enzyme (EC 2.3.2.24) (E2/E3 hybrid ubiquitin-protein ligase UBE2O) (Ubiquitin carrier protein O) (Ubiquitin-conjugating enzyme E2 O) (Ubiquitin-conjugating enzyme E2 of 230 kDa) (Ubiquitin-conjugating enzyme E2-230K) (Ubiquitin-protein ligase O)	6	22.4035	22.0357	21.1348	22.1464	22.9546	22.135	22.2174	22.1637	22.2097	22.2635	22.1123	22.1933	TRUE	0.859617	0.0583111	1.04125			21.4598	20.9135	21.8701	21.4491	20.8867	21.3158	21.2172	20.9599	21.4832	21.4652	21.0747	21.24	TRUE	0.507591	-0.0758114	0.948808
P50402	EMD	EMD EDMD STA	Emerin	6	22.7021	23.1521	22.7131	23.219	22.1018	22.7776	22.5924	22.9495	23.289	22.8811	22.4639	22.8352	TRUE	0.758972	0.0575436	1.04069			21.3216	21.0926	21.5587	21.6161	21.3744	21.3927	21.4021	20.94	22.1116	21.3244	21.0912	21.3739	TRUE	0.910861	-0.0188286	0.987034
Q9H313	TTYH1	TTYH1	Protein tweety homolog 1 (hTTY1)	4	23.3692	24.2918	23.5212	23.2883	24.0413	23.7024	23.2175	23.7715	23.6391	24.0453	24.1227	23.7592	TRUE	0.798733	0.0568672	1.0402			22.1521	22.8013	22.46	22.7611	23.1153	22.658	23.5828	22.9495	23.4451	23.0926	22.9446	23.2029	TRUE	0.134396	0.544939	1.45896
P46379	BAG6	BAG6 BAT3 G3	Large proline-rich protein BAG6 (BAG family molecular chaperone regulator 6) (BCL2-associated athanogene 6) (BAG-6) (HLA-B-associated transcript 3) (Protein G3) (Protein Scythe)	9	22.477	22.0742	22.3156	22.678	22.3985	22.3887	22.5671	22.5147	22.4844	22.4146	22.2463	22.4454	TRUE	0.670671	0.056757	1.04013			21.0513	20.7034	21.6223	21.481	21.3533	21.2422	21.0522	20.7834	21.3647	21.8153	21.1253	21.2282	TRUE	0.903091	-0.0140717	0.990294
P50570	DNM2	DNM2 DYN2	Dynamin-2 (EC 3.6.5.5)	22	23.1114	23.397	23.368	23.1785	22.9811	23.2072	23.0495	22.9752	23.6798	23.3357	23.2795	23.2639	TRUE	0.700527	0.0567318	1.04011			22.4391	22.3727	22.1258	21.8409	22.1327	22.1823	22.24	22.4701	21.9616	22.0677	22.3673	22.2213	TRUE	0.697503	0.0390827	1.02746
P23297	S100A1	S100A1 S100A	Protein S100-A1 (S-100 protein alpha chain) (S-100 protein subunit alpha) (S100 calcium-binding protein A1)	3	20.3671	19.73	19.7345	19.0215	19.6974	19.7101	21.6931	19.1873	19.6925	18.1245	20.1332	19.7661		0.892601	0.0560097	1.03959			19.0209	22.3698	20.4143	18.1672	21.5742	20.3093	21.6751	23.0499	21.1019	21.1231	22.5337	21.8967	TRUE	0.0340907	1.58746	3.0052	TRUE	TRUE
O95433	AHSA1	AHSA1 C14orf3 HSPC322	Activator of 90 kDa heat shock protein ATPase homolog 1 (AHA1) (p38)	6	23.0394	23.2853	22.5612	23.4435	23.9867	23.2632	23.0363	23.0887	23.3397	23.2099	23.9181	23.3185	TRUE	0.780493	0.0553158	1.03909			22.8058	22.1	22.2296	22.2879	22.6596	22.4166	22.3784	22.1553	22.3372	22.1196	22.1196	22.222	TRUE	0.203247	-0.194566	0.873836
Q96CW1	AP2M1	AP2M1 CLAPM1 KIAA0109	AP-2 complex subunit mu (AP-2 mu chain) (Adaptin-mu2) (Adaptor protein complex AP-2 subunit mu) (Adaptor-related protein complex 2 subunit mu) (Clathrin assembly protein complex 2 mu medium chain) (Clathrin coat assembly protein AP50) (Clathrin coat-associated protein AP50) (HA2 50 kDa subunit) (Plasma membrane adaptor AP-2 50 kDa protein)	19	25.9465	26.3165	25.358	26.0226	26.7247	26.0737	25.7911	26.0649	26.3831	25.6839	26.7217	26.1289	TRUE	0.835076	0.0552658	1.03905			25.2169	25.1642	25.1003	25.6504	25.0068	25.2277	25.0132	25.1705	25.2568	25.2859	25.0003	25.1453	TRUE	0.415726	-0.0823833	0.944496
Q5SW79	CEP170	CEP170 FAM68A KAB KIAA0470	Centrosomal protein of 170 kDa (Cep170) (KARP-1-binding protein) (KARP1-binding protein)	6	22.2545	22.5142	19.704	22.6309	21.2681	21.6743	21.5249	22.2586	22.0633	22.138	20.6621	21.7294	TRUE	0.929149	0.0550213	1.03887			20.8783	19.2577	18.9381	20.0608	20.0841	19.8438	18.0762	18.9047	19.3654	18.3977	20.6844	19.0857	TRUE	0.307327	-0.758105	0.591272
P16949	STMN1	STMN1 C1orf215 LAP18 OP18	Stathmin (Leukemia-associated phosphoprotein p18) (Metablastin) (Oncoprotein 18) (Op18) (Phosphoprotein p19) (pp19) (Prosolin) (Protein Pr22) (pp17)	11	25.701	25.2499	24.9684	25.3604	26.1174	25.4794	26.0152	25.5978	25.1997	25.2411	25.6178	25.5343	TRUE	0.751058	0.0549114	1.0388			24.995	24.0049	25.3949	25.9538	25.121	25.0939	25.2058	24.5289	25.3692	25.8983	25.2843	25.2573	TRUE	0.190948	0.163383	1.11991
O43598	DNPH1	DNPH1 C6orf108 RCL	2'-deoxynucleoside 5'-phosphate N-hydrolase 1 (EC 3.2.2.-) (c-Myc-responsive protein RCL)	5	20.0373	20.3102	19.6141	18.7188	19.1826	19.5726	18.4977	19.362	21.6661	19.2932	19.318	19.6274		0.934368	0.0547836	1.0387			17.7762	16.5381	20.4567	20.2107	21.046	19.2056	18.6025	18.2724	20.5942	19.5588	20.5182	19.5092	TRUE	0.532021	0.30368	1.23429
Q01650	SLC7A5	SLC7A5 CD98LC LAT1 MPE16	Large neutral amino acids transporter small subunit 1 (4F2 light chain) (4F2 LC) (4F2LC) (CD98 light chain) (Integral membrane protein E16) (E16) (L-type amino acid transporter 1) (hLAT1) (Solute carrier family 7 member 5) (y+ system cationic amino acid transporter)	4	22.9078	22.9726	21.9571	22.4899	22.4787	22.5612	22.5598	22.6542	22.5921	22.4631	22.8038	22.6146	TRUE	0.792162	0.0533627	1.03768			22.1134	20.9339	21.7739	22.8004	22.3219	21.9887	22.3807	21.697	21.7456	22.1569	21.5859	21.9132	TRUE	0.801707	-0.0754696	0.949033
Q9UHC6	CNTNAP2	CNTNAP2 CASPR2 KIAA0868	Contactin-associated protein-like 2 (Cell recognition molecule Caspr2)	11	23.6076	24.0989	22.867	23.7462	23.4496	23.5539	23.2728	24.0835	23.4212	23.7796	23.4786	23.6072	TRUE	0.727798	0.0532799	1.03762			23.1004	21.9939	23.308	23.1708	22.4741	22.8095	22.7945	22.4807	23.1552	23.2393	22.3325	22.8004	TRUE	0.950911	-0.00900917	0.993775
P20338	RAB4A	RAB4A RAB4	Ras-related protein Rab-4A	5	20.949	20.5624	18.8535	20.7104	21.3348	20.482	19.6073	20.9654	19.4612	21.4124	21.2299	20.5353	TRUE	0.894162	0.0532242	1.03758			19.696	19.6142	20.2653	20.6268	18.8215	19.8048	18.2709	20.0511	20.1024	20.4715	20.0211	19.7834	TRUE	0.962821	-0.0213585	0.985304
P02787	TF	TF PRO1400	Serotransferrin (Transferrin) (Beta-1 metal-binding globulin) (Siderophilin)	17	22.5672	23.5334	22.8342	23.3372	24.4299	23.3404	23.2195	23.4322	23.3869	22.3448	24.5819	23.3931	TRUE	0.866679	0.05271	1.03721			23.5438	23.0464	23.6761	22.6962	22.6889	23.1303	23.9003	22.8193	24.0429	23.5183	23.4262	23.5414	TRUE	0.0909066	0.411121	1.32972
P14324	FDPS	FDPS FPS KIAA1293	Farnesyl pyrophosphate synthase (FPP synthase) (FPS) (EC 2.5.1.10) ((2E,6E)-farnesyl diphosphate synthase) (Dimethylallyltranstransferase) (EC 2.5.1.1) (Farnesyl diphosphate synthase) (Geranyltranstransferase)	5	23.5648	22.9139	23.1768	23.296	23.3313	23.2565	23.7615	23.3312	23.2708	22.7149	23.4675	23.3092	TRUE	0.769644	0.0526333	1.03716			22.8329	22.4749	22.8942	19.1034	22.0113	21.8633	23.0532	22.6232	23.0346	23.2153	22.1125	22.8078	TRUE	0.299038	0.944425	1.92442
P06733	ENO1	ENO1 ENO1L1 MBPB1 MPB1	Alpha-enolase (EC 4.2.1.11) (2-phospho-D-glycerate hydro-lyase) (C-myc promoter-binding protein) (Enolase 1) (MBP-1) (MPB-1) (Non-neural enolase) (NNE) (Phosphopyruvate hydratase) (Plasminogen-binding protein)	36	29.0277	28.5895	28.6644	28.3221	28.7869	28.6781	29.164	28.7287	28.3808	28.5386	28.8367	28.7298	TRUE	0.588261	0.0516495	1.03645			28.1141	28.722	27.8376	27.4682	28.2883	28.086	28.5545	28.8721	28.3446	27.8291	28.2945	28.379	TRUE	0.0350736	0.292943	1.22514
P22314	UBA1	UBA1 A1S9T UBE1	Ubiquitin-like modifier-activating enzyme 1 (EC 6.2.1.45) (Protein A1S9) (Ubiquitin-activating enzyme E1)	25	26.9559	26.5404	26.6148	26.8091	26.6129	26.7066	26.8757	26.7988	26.543	26.7801	26.7922	26.758	TRUE	0.504457	0.051329	1.03622			26.022	25.8831	25.8432	25.8604	26.1463	25.951	25.8487	25.8082	25.9954	25.7576	26.0182	25.8856	TRUE	0.313409	-0.0653717	0.955699
P51674	GPM6A	GPM6A M6A	Neuronal membrane glycoprotein M6-a (M6a)	7	27.3258	27.2801	27.2442	27.2598	28.3229	27.4865	27.6178	27.2121	27.8409	26.9082	28.0998	27.5358	TRUE	0.791641	0.0492104	1.0347			27.2438	26.6911	27.041	27.4182	26.0019	26.8792	27.3466	26.7179	27.0923	27.4512	27.2258	27.1668	TRUE	0.287289	0.287577	1.22059
P04156	PRNP	PRNP ALTPRP PRIP PRP	Major prion protein (PrP) (ASCR) (PrP27-30) (PrP33-35C) (CD antigen CD230)	5	24.5732	24.9025	24.3416	25.2312	24.8374	24.7772	24.3798	24.7775	25.1302	25.2295	24.6074	24.8249	TRUE	0.81339	0.0477116	1.03362			23.449	23.2656	23.2106	23.4549	23.0908	23.2942	23.5249	23.3813	23.9584	23.8354	23.8438	23.7088	TRUE	0.0475796	0.414581	1.33291
Q9BRQ6	CHCHD6	CHCHD6 CHCM1 MIC25	MICOS complex subunit MIC25 (Coiled-coil-helix cristae morphology protein 1) (Coiled-coil-helix-coiled-coil-helix domain-containing protein 6)	7	22.8611	22.9223	22.9589	23.5543	23.0045	23.0602	22.1731	23.2661	23.5431	23.414	23.1389	23.107	TRUE	0.841112	0.0468445	1.033			22.3911	22.1167	22.366	22.9042	22.9384	22.5433	22.1452	21.5109	22.3089	22.6352	22.2642	22.1729	TRUE	0.0335933	-0.37039	0.773573
Q9Y2C4	EXOG	EXOG ENDOGL1 ENDOGL2 ENGL	Nuclease EXOG, mitochondrial (EC 3.1.30.-) (Endonuclease G-like 1) (Endo G-like 1)	2	18.6886	19.7411	19.6968	18.8191	19.6905	19.3272	19.1771	19.2225	20.0051	19.7938	18.6688	19.3735		0.903899	0.0462318	1.03256			17.822	18.9334	17.9982	17.7727	18.2658	18.1584	18.1588	18.4403	17.1352	18.3308	18.1434	18.0417	TRUE	0.677486	-0.116761	0.922256
P06732	CKM	CKM CKMM	Creatine kinase M-type (EC 2.7.3.2) (Creatine kinase M chain) (Creatine phosphokinase M-type) (CPK-M) (M-CK)	3	18.5172	19.8688	19.3911	18.4106	24.1063	20.0588	19.311	20.895	19.8965	19.7374	20.6779	20.1036		0.961812	0.0447666	1.03152			18.5855	21.1381	22.771	22.8286	18.694	20.8034	22.7829	17.7133	22.8532	22.6869	21.7546	21.5582	TRUE	0.603267	0.754718	1.6873
Q9BRT3	MIEN1	MIEN1 C17orf37 RDX12 XTP4	Migration and invasion enhancer 1 (HBV X-transactivated gene 4 protein) (HBV XAg-transactivated protein 4) (Protein C35)	3	21.4389	21.8061	20.8543	21.7055	19.4633	21.0536	21.1999	21.2261	21.4891	21.2375	20.3391	21.0983	TRUE	0.88785	0.0447258	1.03149			19.9499	19.6049	19.1234	19.9613	20.0493	19.7378	20.1428	19.6105	19.6446	19.615	19.9368	19.7899	TRUE	0.739355	0.0521706	1.03682
O15173	PGRMC2	PGRMC2 DG6 PMBP	Membrane-associated progesterone receptor component 2 (Progesterone membrane-binding protein) (Steroid receptor protein DG6)	5	21.8948	21.8119	21.7677	22.4352	22.0116	21.9842	22.0472	22.2825	21.8053	22.3874	21.6218	22.0288	TRUE	0.765519	0.0446056	1.0314			21.1423	21.1885	21.3828	21.2648	21.1603	21.2277	21.4585	21.2139	21.476	21.3433	21.3585	21.37	TRUE	0.0513078	0.142311	1.10367
Q9BR76	CORO1B	CORO1B	Coronin-1B (Coronin-2)	9	22.485	23.3193	22.4245	22.8273	22.8851	22.7883	22.5972	22.921	23.1247	23.1181	22.4024	22.8327	TRUE	0.849895	0.044429	1.03127			21.7517	21.6813	21.5546	21.8675	19.2818	21.2274	21.475	21.8064	21.7926	21.7961	21.3565	21.6453	TRUE	0.379481	0.417928	1.33601
Q13636	RAB31	RAB31 RAB22B	Ras-related protein Rab-31 (Ras-related protein Rab-22B)	4	19.0187	21.2602	20.7159	20.9091	20.8393	20.5486	21.3196	20.856	21.1521	19.2562	20.3805	20.5929	TRUE	0.949394	0.0442383	1.03114			17.7419	19.9679	18.3848	19.5019	18.8121	18.8817	20.0201	20.0712	18.2607	20.1185	19.7724	19.6486	TRUE	0.144063	0.766824	1.70152
Q15382	RHEB	RHEB RHEB2	GTP-binding protein Rheb (Ras homolog enriched in brain)	5	22.0414	22.4048	21.7104	22.4953	22.1468	22.1598	21.9062	22.2037	22.2762	22.1591	22.4747	22.204	TRUE	0.809424	0.0442276	1.03113			21.1716	21.3823	20.7021	21.2506	21.4152	21.1843	21.3135	21.3172	21.0554	21.0974	20.7837	21.1134	TRUE	0.689986	-0.0709053	0.95204
Q6P587	FAHD1	FAHD1 C16orf36 YISKL	Acylpyruvase FAHD1, mitochondrial (EC 3.7.1.5) (Fumarylacetoacetate hydrolase domain-containing protein 1) (FAH domain-containing protein 1) (Oxaloacetate decarboxylase) (OAA decarboxylase) (EC 4.1.1.112) (YisK-like protein)	4	20.7518	21.3844	20.3474	19.0397	21.2408	20.5528	20.8613	20.6688	19.4716	21.0938	20.8885	20.5968	TRUE	0.937874	0.0439922	1.03096			19.7804	19.9744	19.9287	18.6672	20.1811	19.7063	20.3538	19.6717	20.1138	18.8982	20.4211	19.8917	TRUE	0.256963	0.18537	1.13711
P17677	GAP43	GAP43	Neuromodulin (Axonal membrane protein GAP-43) (Growth-associated protein 43) (Neural phosphoprotein B-50) (pp46)	13	26.6335	27.2696	25.9042	27.0405	27.7568	26.9209	26.7607	26.6162	26.6672	26.3638	28.4121	26.964	TRUE	0.895734	0.0430607	1.0303			26.881	26.1339	26.8769	26.8776	26.2909	26.6121	26.4391	26.3199	26.8242	26.5786	26.1278	26.4579	TRUE	0.223854	-0.15415	0.898662
Q12931	TRAP1	TRAP1 HSP75	Heat shock protein 75 kDa, mitochondrial (HSP 75) (TNFR-associated protein 1) (Tumor necrosis factor type 1 receptor-associated protein) (TRAP-1)	17	24.8185	23.8976	23.6938	24.2405	24.1096	24.152	24.507	24.3531	23.8602	24.0945	24.1599	24.195	TRUE	0.760759	0.0429321	1.03021			23.0732	23.3367	22.9056	23.2416	23.7266	23.2568	23.1479	23.2237	23.1052	23.4322	23.7108	23.324	TRUE	0.325811	0.0672142	1.04769
Q9Y2T3	GDA	GDA KIAA1258	Guanine deaminase (Guanase) (Guanine aminase) (EC 3.5.4.3) (Guanine aminohydrolase) (GAH) (p51-nedasin)	18	25.1319	24.8231	24.6632	24.8498	25.4861	24.9908	25.3711	25.0407	24.4415	24.7188	25.5952	25.0334	TRUE	0.671126	0.0426216	1.02998			24.454	23.8848	24.0268	24.5736	24.6809	24.324	24.7959	24.4508	24.735	24.8896	25.1172	24.7977	TRUE	0.00293788	0.473631	1.3886
Q14204	DYNC1H1	DYNC1H1 DHC1 DNCH1 DNCL DNECL DYHC KIAA0325	Cytoplasmic dynein 1 heavy chain 1 (Cytoplasmic dynein heavy chain 1) (Dynein heavy chain, cytosolic)	154	28.238	28.4569	28.279	28.3748	28.4062	28.351	28.3316	28.4665	28.4302	28.3793	28.3572	28.393	TRUE	0.303213	0.0419807	1.02953			27.2706	27.4177	27.1488	27.1511	27.2789	27.2534	27.1589	27.444	27.1826	27.2781	27.2088	27.2545	TRUE	0.981186	0.00105438	1.00073
P04040	CAT	CAT	Catalase (EC 1.11.1.6)	14	23.2448	23.7619	24.8202	23.4067	23.0218	23.6511	24.1722	23.2836	24.1263	23.8397	23.043	23.693	TRUE	0.894239	0.04188	1.02945			22.6738	21.978	22.8201	22.1672	22.4213	22.4121	21.7402	21.8929	22.5637	21.6884	21.9493	21.9669	TRUE	0.0353233	-0.445207	0.734479
P19105	MYL12A	MYL12A MLCB MRLC3 RLC	Myosin regulatory light chain 12A (Epididymis secretory protein Li 24) (HEL-S-24) (MLC-2B) (Myosin RLC) (Myosin regulatory light chain 2, nonsarcomeric) (Myosin regulatory light chain MRLC3)	7	23.8254	24.671	23.7157	24.3527	24.1904	24.151	24.1713	24.2534	24.2534	24.3289	23.9572	24.1928	TRUE	0.82535	0.0417881	1.02939			23.0996	23.257	23.0295	23.3228	23.2548	23.1927	23.1383	23.3494	22.8441	23.2301	23.3108	23.1745	TRUE	0.744675	-0.0182114	0.987456
Q9H1Z4	WDR13	WDR13	WD repeat-containing protein 13	9	23.0808	23.362	22.4333	23.4039	23.2025	23.0965	22.5731	23.3905	23.0435	23.1283	23.5556	23.1382	TRUE	0.847292	0.0416588	1.0293			21.9993	21.7599	22.3224	22.2579	21.9234	22.0526	21.8655	21.6066	22.0494	22.2091	21.7707	21.9003	TRUE	0.0130995	-0.152333	0.899794
O95219	SNX4	SNX4	Sorting nexin-4	4	20.9401	21.485	20.679	21.0352	21.7582	21.1795	20.8776	21.3187	21.2188	21.3156	21.3736	21.2209	TRUE	0.813939	0.0413357	1.02907			19.6983	19.7059	20.03	20.1914	20.1777	19.9606	20.1368	19.7991	20.0474	20.1697	20.0729	20.0452	TRUE	0.419615	0.0845558	1.06036
Q9H7Z7	PTGES2	PTGES2 C9orf15 PGES2	Prostaglandin E synthase 2 (Membrane-associated prostaglandin E synthase-2) (mPGE synthase-2) (Microsomal prostaglandin E synthase 2) (mPGES-2) (Prostaglandin-H(2) E-isomerase) (EC 5.3.99.3) [Cleaved into: Prostaglandin E synthase 2 truncated form]	3	20.3236	19.614	20.4324	18.9207	18.3116	19.5205	18.441	20.6834	19.6512	20.2989	18.7343	19.5618		0.949041	0.0412785	1.02903			19.5949	19.7099	19.9011	19.7178	19.8302	19.7508	19.8305	20.0906	20.0329	20.2368	19.8423	20.0066	TRUE	0.0459209	0.255828	1.19402
Q14894	CRYM	CRYM THBP	Ketimine reductase mu-crystallin (EC 1.5.1.25) (NADP-regulated thyroid-hormone-binding protein)	12	25.3438	25.2321	24.0829	25.105	26.7909	25.3109	25.3916	25.1764	24.9071	24.609	26.6745	25.3517	TRUE	0.859647	0.0407806	1.02867			24.9829	24.0802	25.0516	25.5881	25.1453	24.9696	25.0683	24.6444	25.3613	25.6502	25.3904	25.2229	TRUE	0.0492339	0.2533	1.19193
Q9Y4J8	DTNA	DTNA DRP3	Dystrobrevin alpha (DTN-A) (Alpha-dystrobrevin) (Dystrophin-related protein 3)	8	23.5437	23.5571	23.9841	23.773	22.5295	23.4775	23.8423	23.4717	24.0142	23.9809	22.2822	23.5183	TRUE	0.699644	0.040778	1.02867			22.0041	22.3001	21.7335	20.7458	21.8516	21.727	22.2998	22.5219	21.8418	21.379	21.972	22.0029	TRUE	0.0448872	0.275902	1.21075
Q02790	FKBP4	FKBP4 FKBP52	Peptidyl-prolyl cis-trans isomerase FKBP4 (PPIase FKBP4) (EC 5.2.1.8) (51 kDa FK506-binding protein) (FKBP51) (52 kDa FK506-binding protein) (52 kDa FKBP) (FKBP-52) (59 kDa immunophilin) (p59) (FK506-binding protein 4) (FKBP-4) (FKBP59) (HSP-binding immunophilin) (HBI) (Immunophilin FKBP52) (Rotamase) [Cleaved into: Peptidyl-prolyl cis-trans isomerase FKBP4, N-terminally processed]	15	23.9498	23.3717	23.1023	23.3669	23.8465	23.5274	23.8079	23.6346	23.6533	23.2775	23.4677	23.5682	TRUE	0.815604	0.0407642	1.02866			22.6857	22.659	22.8508	22.7239	23.1441	22.8127	22.9986	22.7006	22.9486	22.4409	23.0093	22.8196	TRUE	0.949155	0.00690689	1.0048
P24821	TNC	TNC HXB	Tenascin (TN) (Cytotactin) (GMEM) (GP 150-225) (Glioma-associated-extracellular matrix antigen) (Hexabrachion) (JI) (Myotendinous antigen) (Neuronectin) (Tenascin-C) (TN-C)	40	24.5492	25.5874	25.2157	24.3335	23.5812	24.6534	24.4418	25.0097	24.942	24.962	24.1136	24.6938	TRUE	0.870897	0.0404472	1.02843			23.2114	25.961	19.9988	18.3237	23.0487	22.1087	23.0212	24.9288	20.6877	19.4344	21.7742	21.9693	TRUE	0.779477	-0.139471	0.907852				TRUE
P10114	RAP2A	RAP2A	Ras-related protein Rap-2a (RbBP-30)	10	23.1136	23.5225	23.2648	23.4359	24.1105	23.4895	22.9099	23.5341	23.5485	23.4288	24.2266	23.5296	TRUE	0.642082	0.0400928	1.02818			23.3106	22.7896	22.7839	22.9604	23.2058	23.0101	23.338	22.9472	22.9973	23.2548	22.9878	23.105	TRUE	0.348622	0.0949436	1.06802
P62753	RPS6	RPS6 OK/SW-cl.2	40S ribosomal protein S6 (Phosphoprotein NP33) (Small ribosomal subunit protein eS6)	5	22.9874	23.1285	22.8045	23.379	22.865	23.0329	23.3996	23.0286	23.1909	23.5628	22.1829	23.073	TRUE	0.852772	0.040081	1.02817			21.5263	21.991	21.8583	22.0333	21.8889	21.8595	19.0549	21.7822	22.0046	22.2266	21.8053	21.3747	TRUE	0.388902	-0.484825	0.714584
P63010	AP2B1	AP2B1 ADTB2 CLAPB1	AP-2 complex subunit beta (AP105B) (Adaptor protein complex AP-2 subunit beta) (Adaptor-related protein complex 2 subunit beta) (Beta-2-adaptin) (Beta-adaptin) (Clathrin assembly protein complex 2 beta large chain) (Plasma membrane adaptor HA2/AP2 adaptin beta subunit)	37	26.8002	27.2158	26.1344	26.8479	27.1767	26.835	26.6182	26.8445	26.9399	26.6879	27.28	26.8741	TRUE	0.858679	0.0391018	1.02747			26.1178	25.6581	25.8471	26.1371	25.7719	25.9064	25.8663	25.7337	25.9939	26.1497	26.0061	25.95	TRUE	0.625269	0.0435707	1.03066
Q9UIW2	PLXNA1	PLXNA1 NOV PLXN1	Plexin-A1 (Semaphorin receptor NOV)	19	23.5999	23.9025	22.7043	23.7397	24.0135	23.592	23.1085	23.5805	23.8529	23.3664	24.2469	23.6311	TRUE	0.904042	0.039053	1.02744			22.5105	22.1111	22.1395	22.9442	22.8851	22.5181	22.4042	21.6782	22.7312	23.0101	22.3104	22.4268	TRUE	0.679356	-0.0912922	0.938682
Q15436	SEC23A	SEC23A	Protein transport protein Sec23A (hSec23A) (SEC23-related protein A)	9	21.7234	20.9179	21.5492	21.916	21.6129	21.5439	21.284	21.9034	21.325	21.6819	21.7196	21.5828	TRUE	0.884965	0.0388882	1.02732			20.3282	21.2075	20.5528	20.4077	20.7169	20.6426	20.4137	20.8593	21.2283	20.9997	20.5435	20.8089	TRUE	0.459475	0.166275	1.12216
Q14C86	GAPVD1	GAPVD1 GAPEX5 KIAA1521 RAP6	GTPase-activating protein and VPS9 domain-containing protein 1 (GAPex-5) (Rab5-activating protein 6)	3	18.0356	19.9755	20.0846	20.2882	20.2722	19.7312	20.0933	20.1531	19.1318	20.237	19.2291	19.7689	TRUE	0.949545	0.0376629	1.02645			18.9933	19.2001	18.9496	19.0881	19.1214	19.0705	18.9429	19.2214	19.2311	19.0256	19.1437	19.1129	TRUE	0.533329	0.0424202	1.02984
O95989	NUDT3	NUDT3 DIPP DIPP1	Diphosphoinositol polyphosphate phosphohydrolase 1 (DIPP-1) (EC 3.6.1.52) (Diadenosine 5',5'''-P1,P6-hexaphosphate hydrolase 1) (EC 3.6.1.-) (Nucleoside diphosphate-linked moiety X motif 3) (Nudix motif 3)	5	23.0815	22.9969	22.1459	22.5443	23.838	22.9213	22.8668	23.0475	22.7433	22.6923	23.4448	22.9589	TRUE	0.835287	0.0376179	1.02642			22.7959	22.3027	22.8124	22.7045	22.4113	22.6054	22.9773	22.5839	22.7043	22.3794	23.0042	22.7298	TRUE	0.476636	0.124451	1.09009
Q16531	DDB1	DDB1 XAP1	DNA damage-binding protein 1 (DDB p127 subunit) (DNA damage-binding protein a) (DDBa) (Damage-specific DNA-binding protein 1) (HBV X-associated protein 1) (XAP-1) (UV-damaged DNA-binding factor) (UV-damaged DNA-binding protein 1) (UV-DDB 1) (XPE-binding factor) (XPE-BF) (Xeroderma pigmentosum group E-complementing protein) (XPCe)	17	22.674	22.4897	22.5429	21.7027	23.1228	22.5064	22.9533	22.4958	21.9933	22.4749	22.7995	22.5434	TRUE	0.881083	0.036937	1.02593			22.2502	21.9807	22.5835	22.3961	22.1559	22.2733	22.2631	22.2199	22.3496	22.3504	22.0569	22.248	TRUE	0.760735	-0.0253326	0.982594
P36542	ATP5F1C	ATP5F1C ATP5C ATP5C1 ATP5CL1	ATP synthase subunit gamma, mitochondrial (ATP synthase F1 subunit gamma) (F-ATPase gamma subunit)	10	26.0917	25.7951	25.2804	26.1217	26.5413	25.966	25.7867	25.9576	25.842	25.8259	26.5962	26.0017	TRUE	0.835651	0.0356602	1.02503			25.4411	25.458	25.4674	25.5774	25.1867	25.4261	25.4719	25.3446	25.5558	25.4932	25.4196	25.457	TRUE	0.64681	0.0309216	1.02166
P49589	CARS1	CARS1 CARS	Cysteine--tRNA ligase, cytoplasmic (EC 6.1.1.16) (Cysteinyl-tRNA synthetase) (CysRS)	13	22.8802	22.6065	22.1753	22.5772	22.6414	22.5761	22.7745	22.4462	22.4858	22.7268	22.6248	22.6116	TRUE	0.702694	0.0354832	1.0249			22.3072	22.0083	22.0589	21.9878	22.1793	22.1083	22.1279	21.9708	21.896	21.8699	22.2008	22.0131	TRUE	0.067026	-0.0952377	0.936118
P14625	HSP90B1	HSP90B1 GRP94 TRA1	Endoplasmin (94 kDa glucose-regulated protein) (GRP-94) (Heat shock protein 90 kDa beta member 1) (Tumor rejection antigen 1) (gp96 homolog)	24	25.8193	25.7954	25.7513	25.8605	26.1252	25.8703	25.7643	25.8113	25.9837	25.9259	26.0416	25.9054	TRUE	0.564681	0.0350273	1.02458			24.8363	25.0135	24.8973	24.893	24.6031	24.8486	24.6295	24.7654	24.8385	24.5937	24.4656	24.6585	TRUE	0.0107543	-0.190139	0.876521
P52565	ARHGDIA	ARHGDIA GDIA1	Rho GDP-dissociation inhibitor 1 (Rho GDI 1) (Rho-GDI alpha)	8	25.4164	25.6708	25.2049	25.341	25.9837	25.5234	25.5895	25.7285	25.7019	24.9437	25.8282	25.5584	TRUE	0.828042	0.0350117	1.02457			24.9147	25.1229	24.2841	24.431	24.7019	24.6909	24.5873	24.8201	24.5006	24.3877	24.4151	24.5422	TRUE	0.228343	-0.148772	0.902018
Q8TC12	RDH11	RDH11 ARSDR1 PSDR1 SDR7C1 CGI-82	Retinol dehydrogenase 11 (EC 1.1.1.300) (Androgen-regulated short-chain dehydrogenase/reductase 1) (HCV core-binding protein HCBP12) (Prostate short-chain dehydrogenase/reductase 1) (Retinal reductase 1) (RalR1) (Short chain dehydrogenase/reductase family 7C member 1)	4	21.595	21.5475	21.891	21.6081	21.1558	21.5595	21.5989	21.6667	21.4754	21.7357	21.4958	21.5945	TRUE	0.793436	0.0349987	1.02456			20.7278	20.5964	20.3106	20.5236	20.1749	20.4667	18.6878	20.5898	20.2381	20.4372	19.9751	19.9856	TRUE	0.285903	-0.481119	0.716422
P60520	GABARAPL2	GABARAPL2 FLC3A GEF2	Gamma-aminobutyric acid receptor-associated protein-like 2 (GABA(A) receptor-associated protein-like 2) (Ganglioside expression factor 2) (GEF-2) (General protein transport factor p16) (Golgi-associated ATPase enhancer of 16 kDa) (GATE-16) (MAP1 light chain 3-related protein)	4	22.2557	23.1563	23.3395	22.9694	22.9398	22.9321	23.0959	23.0235	22.933	22.8566	22.9245	22.9667	TRUE	0.878138	0.0345806	1.02426			22.4723	21.876	22.6099	22.7837	21.942	22.3368	21.7725	21.9952	22.5252	22.143	21.8936	22.0659	TRUE	0.179885	-0.270895	0.828805
P37235	HPCAL1	HPCAL1 BDR1	Hippocalcin-like protein 1 (Calcium-binding protein BDR-1) (HLP2) (Visinin-like protein 3) (VILIP-3)	10	24.0636	23.1999	23.3692	24.0321	24.5472	23.8424	23.591	23.8977	23.8503	23.7161	24.3272	23.8765	TRUE	0.890714	0.0340778	1.0239			23.0271	22.8929	22.6956	23.1124	23.1858	22.9828	22.9683	22.8394	22.7186	23.2324	22.937	22.9392	TRUE	0.511911	-0.0436253	0.970214
Q9NQC3	RTN4	RTN4 KIAA0886 NOGO My043 SP1507	Reticulon-4 (Foocen) (Neurite outgrowth inhibitor) (Nogo protein) (Neuroendocrine-specific protein) (NSP) (Neuroendocrine-specific protein C homolog) (RTN-x) (Reticulon-5)	27	25.4364	25.7613	25.0925	25.8663	25.605	25.5523	25.4128	25.6296	25.3821	25.9042	25.6031	25.5863	TRUE	0.651309	0.0340351	1.02387			24.857	24.7441	24.6985	24.5962	24.5721	24.6936	24.7269	24.5537	24.6256	24.4298	24.3606	24.5393	TRUE	0.00320292	-0.154273	0.898585
P26440	IVD	IVD	Isovaleryl-CoA dehydrogenase, mitochondrial (IVD) (EC 1.3.8.4)	6	23.4043	23.7495	22.6604	23.4077	23.3768	23.3197	23.1151	23.4747	23.3381	23.2512	23.5891	23.3536	TRUE	0.863312	0.0338959	1.02377			22.5182	22.2702	22.4158	22.6214	22.6991	22.5049	22.4741	22.4682	22.2325	22.3438	22.8162	22.467	TRUE	0.691396	-0.0379818	0.974017
P53680	AP2S1	AP2S1 AP17 CLAPS2	AP-2 complex subunit sigma (Adaptor protein complex AP-2 subunit sigma) (Adaptor-related protein complex 2 subunit sigma) (Clathrin assembly protein 2 sigma small chain) (Clathrin coat assembly protein AP17) (Clathrin coat-associated protein AP17) (HA2 17 kDa subunit) (Plasma membrane adaptor AP-2 17 kDa protein) (Sigma2-adaptin)	6	24.8965	24.6551	24.6003	25.2409	25.1631	24.9112	24.7628	25.2491	24.7255	24.8685	25.1163	24.9444	TRUE	0.846757	0.0332943	1.02335			23.7322	23.389	23.6872	23.7497	23.3301	23.5776	23.7501	23.7583	23.2992	23.8438	23.5006	23.6304	TRUE	0.694069	0.0527615	1.03725
O75915	ARL6IP5	ARL6IP5 DERP11 JWA PRA2 PRAF3 HSPC127	PRA1 family protein 3 (ADP-ribosylation factor-like protein 6-interacting protein 5) (ARL-6-interacting protein 5) (Aip-5) (Cytoskeleton-related vitamin A-responsive protein) (Dermal papilla-derived protein 11) (GTRAP3-18) (Glutamate transporter EAAC1-interacting protein) (JM5) (Prenylated Rab acceptor protein 2) (Protein JWa) (Putative MAPK-activating protein PM27)	4	23.4403	24.1361	23.1232	24.1269	23.3851	23.6423	23.721	23.9837	23.8351	23.9293	22.9082	23.6755	TRUE	0.881343	0.0331669	1.02326			22.6703	22.4086	22.5374	22.7976	22.7973	22.6423	22.4365	22.7784	22.301	22.6698	22.5464	22.5464	TRUE	0.463845	-0.0958366	0.935729
Q9HD34	LYRM4	LYRM4 C6orf149 ISD11 CGI-203	LYR motif-containing protein 4	3	22.1566	22.801	21.707	21.8474	21.9338	22.0892	21.6132	22.6132	22.4879	21.7614	22.1358	22.1223	TRUE	0.888433	0.0331333	1.02323			21.2362	17.7537	21.1167	20.8926	20.4443	20.2887	18.17	20.5288	21.1552	20.7615	20.6753	20.2582	TRUE	0.975308	-0.0305122	0.979073
P67936	TPM4	TPM4	Tropomyosin alpha-4 chain (TM30p1) (Tropomyosin-4)	23	27.0779	26.9552	26.9342	27.0155	26.9343	26.9834	27.0507	26.9915	26.8392	27.121	27.0797	27.0164	TRUE	0.490298	0.0330246	1.02315			25.6053	26.161	25.6485	26.008	25.7543	25.8354	25.8011	25.9026	25.7148	25.7756	25.6268	25.7642	TRUE	0.463079	-0.0712254	0.951829
P52758	RIDA	RIDA HRSP12	2-iminobutanoate/2-iminopropanoate deaminase (EC 3.5.99.10) (14.5 kDa translational inhibitor protein) (hp14.5) (p14.5) (Heat-responsive protein 12) (Reactive intermediate imine deaminase A homolog) (Translation inhibitor L-PSP ribonuclease) (UK114 antigen homolog)	4	22.915	23.2847	21.9243	23.3343	23.9142	23.0745	23.407	22.693	22.6779	23.0706	23.6881	23.1073	TRUE	0.902919	0.0328022	1.023			22.6849	21.9993	22.9168	21.9113	22.3194	22.3664	22.8326	22.0008	22.9752	22.1461	22.149	22.4208	TRUE	0.47327	0.0543999	1.03843
Q8WUD1	RAB2B	RAB2B	Ras-related protein Rab-2B	10	22.2199	21.7722	20.7309	21.8919	20.7157	21.4661	22.1346	21.7427	21.2488	22.3571	20.0111	21.4988	TRUE	0.889825	0.0327305	1.02295			19.7069	19.1625	18.2205	18.7444	19.0377	18.9744	17.2224	18.608	19.0788	21.274	18.0008	18.8368		0.879858	-0.137585	0.909039
P17174	GOT1	GOT1	Aspartate aminotransferase, cytoplasmic (cAspAT) (EC 2.6.1.1) (EC 2.6.1.3) (Cysteine aminotransferase, cytoplasmic) (Cysteine transaminase, cytoplasmic) (cCAT) (Glutamate oxaloacetate transaminase 1) (Transaminase A)	22	27.2859	27.3693	26.7281	27.0994	28.2952	27.3556	27.1367	27.2326	27.1233	27.1705	28.2777	27.3882	TRUE	0.759309	0.032576	1.02284			27.347	26.471	27.4953	27.267	26.8154	27.0791	27.2837	26.7187	27.4668	27.0949	26.7944	27.0717	TRUE	0.919461	-0.00745544	0.994846
Q9BX66	SORBS1	SORBS1 KIAA0894 KIAA1296 SH3D5	Sorbin and SH3 domain-containing protein 1 (Ponsin) (SH3 domain protein 5) (SH3P12) (c-Cbl-associated protein) (CAP)	13	23.6017	23.5456	23.2487	23.5957	22.9081	23.38	23.528	23.393	23.4933	23.9366	22.7089	23.4119	TRUE	0.784477	0.031992	1.02242			22.1097	22.6879	22.0219	22.0953	22.5341	22.2898	21.9563	22.4204	22.3429	22.1762	22.2975	22.2386	TRUE	0.669548	-0.0511539	0.965164
P16435	POR	POR CYPOR	NADPH--cytochrome P450 reductase (CPR) (P450R) (EC 1.6.2.4)	11	22.2424	22.1148	22.041	22.4545	22.217	22.214	22.4477	22.2417	22.0792	22.2589	22.2001	22.2455	TRUE	0.668018	0.0315598	1.02212			20.9574	21.592	20.9396	21.2023	21.2205	21.1824	20.9537	21.258	21.3237	20.9133	21.2556	21.1409	TRUE	0.76454	-0.0415089	0.971638
P13807	GYS1	GYS1 GYS	Glycogen [starch] synthase, muscle (EC 2.4.1.11)	4	20.5804	20.5842	20.6604	20.3059	19.9226	20.4107	20.7967	20.2246	20.094	20.8976	20.1967	20.4419	TRUE	0.891089	0.0312366	1.02189			18.9836	20.4719	19.2093	19.381	18.9694	19.403	18.2818	20.1437	18.8955	19.3003	18.9906	19.1224	TRUE	0.0878864	-0.280674	0.823206
P53805	RCAN1	RCAN1 ADAPT78 CSP1 DSC1 DSCR1	Calcipressin-1 (Adapt78) (Down syndrome critical region protein 1) (Myocyte-enriched calcineurin-interacting protein 1) (MCIP1) (Regulator of calcineurin 1)	2	19.5051	19.6007	20.4108	20.5615	19.021	19.8198	19.6702	19.7914	19.8439	20.0284	19.9205	19.8509	TRUE	0.914414	0.0310581	1.02176			17.9644	18.3983	18.3982	18.586	17.7192	18.2132	19.2614	18.4506	17.9416	18.7095	20.2675	18.9261		0.258265	0.712896	1.63909
O43237	DYNC1LI2	DYNC1LI2 DNCLI2 LIC2	Cytoplasmic dynein 1 light intermediate chain 2 (Dynein light intermediate chain 2, cytosolic) (LIC-2) (LIC53/55)	7	22.165	22.3889	21.8195	22.6004	22.2344	22.2416	22.3354	22.5942	22.1259	22.3485	21.9573	22.2723	TRUE	0.814981	0.0306332	1.02146			21.395	21.7983	21.2282	21.1156	21.7869	21.4648	21.3132	21.5373	21.5545	21.2579	21.1565	21.3639	TRUE	0.574988	-0.100927	0.932434
Q9NRW7	VPS45	VPS45 VPS45A VPS45B	Vacuolar protein sorting-associated protein 45 (h-VPS45) (hlVps45)	10	21.7873	22.135	20.2314	22.2991	22.1008	21.7107	21.9688	22.0941	20.2744	22.235	22.1327	21.741	TRUE	0.520355	0.0302662	1.0212			20.544	20.3727	20.6593	21.0332	20.2208	20.566	21.1021	20.8259	21.2852	20.8803	20.7181	20.9623	TRUE	0.0476467	0.396325	1.31615
P14314	PRKCSH	PRKCSH G19P1	Glucosidase 2 subunit beta (80K-H protein) (Glucosidase II subunit beta) (Protein kinase C substrate 60.1 kDa protein heavy chain) (PKCSH)	10	22.7024	23.1847	22.9447	23.4746	22.8072	23.0227	22.9828	22.9496	23.2926	23.2277	22.8117	23.0529	TRUE	0.820694	0.0301918	1.02115			21.9473	22.1601	21.9969	22.1041	21.9369	22.0291	22.005	22.1347	21.9899	21.9284	21.8766	21.9869	TRUE	0.3351	-0.0421474	0.971208
P37837	TALDO1	TALDO1 TAL TALDO TALDOR	Transaldolase (EC 2.2.1.2)	9	21.5974	22.5031	23.6254	21.9657	23.3098	22.6003	22.4133	22.7978	22.1712	22.1219	23.6481	22.6305	TRUE	0.941685	0.0301601	1.02113			23.2802	22.8702	23.2239	21.9348	21.9408	22.65	23.2232	22.621	23.1525	22.2526	21.9522	22.6403	TRUE	0.921803	-0.00966606	0.993322
P43686	PSMC4	PSMC4 MIP224 TBP7	26S proteasome regulatory subunit 6B (26S proteasome AAA-ATPase subunit RPT3) (MB67-interacting protein) (MIP224) (Proteasome 26S subunit ATPase 4) (Tat-binding protein 7) (TBP-7)	7	22.1029	22.1322	21.867	21.7519	21.9911	21.969	22.2213	21.8743	21.8956	21.9812	22.0229	21.9991	TRUE	0.728625	0.0300591	1.02105			20.6866	21.3103	21.0915	20.9791	20.9574	21.005	21.1941	20.8196	21.292	21.0844	21.0378	21.0856	TRUE	0.644575	0.0805859	1.05745
Q8N4C8	MINK1	MINK1 B55 MAP4K6 MINK YSK2 ZC3	Misshapen-like kinase 1 (EC 2.7.11.1) (GCK family kinase MiNK) (MAPK/ERK kinase kinase kinase 6) (MEK kinase kinase 6) (MEKKK 6) (Misshapen/NIK-related kinase) (Mitogen-activated protein kinase kinase kinase kinase 6)	14	23.8296	24.1911	23.604	24.2133	22.9964	23.7669	23.8103	24.0445	23.6466	24.2181	23.2644	23.7968	TRUE	0.68059	0.0299019	1.02094			22.4192	22.5521	22.287	22.4551	22.5695	22.4566	22.511	22.4579	22.238	22.3114	22.422	22.3881	TRUE	0.194206	-0.0685001	0.953629
Q5TF21	SOGA3	SOGA3 C6orf174	Protein SOGA3	20	23.8987	24.2355	23.2939	24.226	24.2823	23.9873	23.6814	24.0812	24.0299	23.8943	24.3981	24.017	TRUE	0.884186	0.0296871	1.02079			23.1754	22.7573	23.0038	23.5892	23.2633	23.1578	23.1095	22.6238	23.3224	23.2146	23.0737	23.0688	TRUE	0.478763	-0.0890244	0.940158
P35606	COPB2	COPB2	Coatomer subunit beta' (Beta'-coat protein) (Beta'-COP) (p102)	10	21.5789	22.0803	24.1456	21.393	22.9629	22.4322	21.8647	22.078	22.6685	23.1026	22.5937	22.4615	TRUE	0.95735	0.0293438	1.02055			21.5163	22.0034	22.0734	21.1622	21.299	21.6108	21.5947	17.6894	21.7374	21.9064	21.4822	20.882	TRUE	0.469283	-0.728837	0.60339
Q9NT99	LRRC4B	LRRC4B LRIG4	Leucine-rich repeat-containing protein 4B (Netrin-G3 ligand) (NGL-3)	3	18.7973	20.0122	19.3673	19.4272	19.9809	19.517	19.3048	19.6366	20.56	19.903	18.3252	19.5459	TRUE	0.955607	0.0289722	1.02029			17.9377	18.0749	17.6258	17.9146	17.8716	17.8849	18.0407	18.8773	17.7534	19.1803	18.398	18.4499	TRUE	0.060842	0.564994	1.47938
O43681	ASNA1	ASNA1 ARSA TRC40	ATPase ASNA1 (EC 3.6.-.-) (Arsenical pump-driving ATPase) (Arsenite-stimulated ATPase) (Transmembrane domain recognition complex 40 kDa ATPase subunit) (hARSA-I) (hASNA-I)	5	22.8466	22.4446	22.6661	19.1954	22.9201	22.0146	22.7236	22.5746	22.2417	22.8543	19.8211	22.043	TRUE	0.980171	0.0284794	1.01994			21.5914	21.664	22.1553	21.9039	21.593	21.7815	21.6202	21.8648	22.0791	22.121	21.9167	21.9204	TRUE	0.124395	0.138884	1.10105
P35998	PSMC2	PSMC2 MSS1	26S proteasome regulatory subunit 7 (26S proteasome AAA-ATPase subunit RPT1) (Proteasome 26S subunit ATPase 2) (Protein MSS1)	14	23.2968	23.3035	23.1416	23.1812	23.0227	23.1892	23.3224	23.2495	23.1428	23.1712	23.2004	23.2173	TRUE	0.51704	0.0280785	1.01965			22.5387	22.4678	22.614	22.7633	22.5592	22.5886	22.302	22.5129	22.7003	22.575	22.4081	22.4997	TRUE	0.242489	-0.0889336	0.940217
O94903	PLPBP	PLPBP PROSC	Pyridoxal phosphate homeostasis protein (PLP homeostasis protein) (Proline synthase co-transcribed bacterial homolog protein) (Pyridoxal phosphate-binding protein)	5	23.1746	23.742	22.4612	23.4558	22.6211	23.0909	23.2661	23.1968	23.0487	23.4035	22.6779	23.1186	TRUE	0.885594	0.0276985	1.01938			21.649	21.6243	21.6726	21.3981	21.6561	21.6	21.9528	21.4911	21.5806	21.4548	21.3731	21.5705	TRUE	0.781093	-0.0295315	0.979738
Q9Y6C9	MTCH2	MTCH2 MIMP HSPC032	Mitochondrial carrier homolog 2 (Met-induced mitochondrial protein)	7	24.0508	24.541	23.4574	24.4214	24.459	24.1859	23.8724	24.2563	24.05	23.9725	24.9133	24.2129	TRUE	0.903152	0.027002	1.01889			23.3312	23.6257	23.241	23.463	23.2092	23.374	23.2568	23.4852	23.2341	23.2683	23.1832	23.2855	TRUE	0.0656938	-0.0884907	0.940506
P61586	RHOA	RHOA ARH12 ARHA RHO12	Transforming protein RhoA (EC 3.6.5.2) (Rho cDNA clone 12) (h12)	8	24.3696	23.6568	24.3626	23.9514	24.1986	24.1078	24.0325	24.0492	24.0889	24.1	24.4033	24.1348	TRUE	0.858463	0.0269878	1.01888			22.9097	23.7882	23.2706	23.217	23.0241	23.2419	23.1263	23.6406	22.9941	23.3065	23.493	23.3121	TRUE	0.622906	0.0702141	1.04987
Q9UNZ2	NSFL1C	NSFL1C UBXN2C	NSFL1 cofactor p47 (UBX domain-containing protein 2C) (p97 cofactor p47)	16	25.1585	24.8786	24.4387	24.975	24.0792	24.706	25.1612	24.8555	24.7615	24.7457	24.1411	24.733	TRUE	0.776344	0.0269695	1.01887			23.4482	23.0538	23.2526	23.1956	23.6599	23.322	23.2823	22.8967	23.2161	23.1002	23.377	23.1745	TRUE	0.0229789	-0.147536	0.902791
Q6NVY1	HIBCH	HIBCH	3-hydroxyisobutyryl-CoA hydrolase, mitochondrial (EC 3.1.2.4) (3-hydroxyisobutyryl-coenzyme A hydrolase) (HIB-CoA hydrolase) (HIBYL-CoA-H)	8	23.1667	23.6738	22.4318	22.6678	23.5218	23.0924	22.9964	23.3019	23.1411	22.3549	23.802	23.1193	TRUE	0.902167	0.0268822	1.01881			21.5426	21.828	22.1793	21.019	22.6194	21.8377	21.7744	21.8842	22.1848	21.4334	22.6412	21.9836	TRUE	0.135845	0.145924	1.10644
Q5SSJ5	HP1BP3	HP1BP3	Heterochromatin protein 1-binding protein 3 (Protein HP1-BP74)	7	22.5408	22.8793	22.9163	22.7107	22.3349	22.6764	22.3772	22.9129	23.1112	22.6881	22.4254	22.703	TRUE	0.678865	0.0265675	1.01859			21.9638	21.7806	22.5911	22.0561	21.5731	21.9929	21.2701	20.9809	22.2242	21.9232	21.2416	21.528	TRUE	0.0193842	-0.464945	0.724499
P62318	SNRPD3	SNRPD3	Small nuclear ribonucleoprotein Sm D3 (Sm-D3) (snRNP core protein D3)	2	21.4113	21.2023	22.5273	21.2751	19.6955	21.2223	21.9657	21.5435	19.1351	21.6639	21.9346	21.2485	TRUE	0.978711	0.0262451	1.01836			20.3157	20.8046	21.1291	20.6105	20.1989	20.6118	21.154	20.9591	21.2492	20.8161	20.9177	21.0192	TRUE	0.0564665	0.40746	1.32635
P15170	GSPT1	GSPT1 ERF3A	Eukaryotic peptide chain release factor GTP-binding subunit ERF3A (Eukaryotic peptide chain release factor subunit 3a) (eRF3a) (G1 to S phase transition protein 1 homolog)	5	19.3961	18.8429	21.3611	21.7609	21.8258	20.6374	21.0033	21.3572	19.9134	21.5773	19.4667	20.6636	TRUE	0.978406	0.0262321	1.01835			17.9981	20.8348	18.364	21.1386	18.3252	19.3322	18.6552	21.1037	19.0624	20.9587	21.0977	20.1755	TRUE	0.172006	0.843357	1.79422
P50991	CCT4	CCT4 CCTD SRB	T-complex protein 1 subunit delta (TCP-1-delta) (CCT-delta) (Stimulator of TAR RNA-binding)	18	24.9048	25.2307	24.7413	24.7199	25.1874	24.9568	24.9163	25.0436	24.9891	24.6063	25.3577	24.9826	TRUE	0.769766	0.0257504	1.01801			23.9043	24.0848	23.9522	24.2126	24.0053	24.0318	24.1849	24.1586	24.1382	24.1216	24.0786	24.1364	TRUE	0.16891	0.104568	1.07517
Q9UL25	RAB21	RAB21 KIAA0118	Ras-related protein Rab-21	6	23.0163	22.3712	22.1747	22.7358	22.3298	22.5256	22.713	22.7216	22.4507	22.9627	21.908	22.5512	TRUE	0.88095	0.0256577	1.01794			21.2657	21.4424	21.5253	21.0089	21.3553	21.3195	21.9936	21.9684	21.185	21.3534	21.8209	21.6643	TRUE	0.131339	0.344753	1.26993
P12236	SLC25A6	SLC25A6 ANT3 CDABP0051	ADP/ATP translocase 3 (ADP,ATP carrier protein 3) (ADP,ATP carrier protein, isoform T2) (ANT 2) (Adenine nucleotide translocator 3) (ANT 3) (Solute carrier family 25 member 6) [Cleaved into: ADP/ATP translocase 3, N-terminally processed]	15	24.6959	24.5036	23.7382	24.3796	25.0183	24.4671	24.4298	24.9582	24.0534	24.2811	24.7325	24.491	TRUE	0.883255	0.023867	1.01668			24.022	24.0293	24.0385	23.8442	23.56	23.8988	23.7859	24.0683	23.7119	24.2839	23.3672	23.8434	TRUE	0.708095	-0.0553768	0.962343
Q6P995	FAM171B	FAM171B KIAA1946 NPD019	Protein FAM171B	2	21.112	22.2053	20.6888	21.7563	20.996	21.3517	20.9767	22.135	22.2657	22.7175	18.7828	21.3755	TRUE	0.972272	0.0238655	1.01668			19.9774	20.0194	20.0231	19.8694	20.0678	19.9914	18.7501	19.8809	20.0874	19.8031	19.7483	19.654	TRUE	0.217755	-0.337463	0.791432
P23246	SFPQ	SFPQ PSF	Splicing factor, proline- and glutamine-rich (100 kDa DNA-pairing protein) (hPOMp100) (DNA-binding p52/p100 complex, 100 kDa subunit) (Polypyrimidine tract-binding protein-associated-splicing factor) (PSF) (PTB-associated-splicing factor)	9	24.5462	24.7232	24.0014	24.6904	23.4944	24.2911	24.1893	24.4964	24.3374	24.7205	23.8285	24.3144	TRUE	0.87723	0.0233269	1.0163			23.0587	22.8716	23.9801	23.6784	23.3467	23.3871	22.5483	22.5906	23.5725	23.7064	23.474	23.1784	TRUE	0.16608	-0.208723	0.865303
Q9Y6R1	SLC4A4	SLC4A4 NBC NBC1 NBCE1	Electrogenic sodium bicarbonate cotransporter 1 (Sodium bicarbonate cotransporter) (Na(+)/HCO3(-) cotransporter) (Solute carrier family 4 member 4) (kNBC1)	6	23.2396	23.4376	22.6293	23.228	23.2884	23.1646	22.5658	23.2303	23.329	23.3427	23.4717	23.1879	TRUE	0.923184	0.0232998	1.01628			21.0767	21.814	21.8462	21.9251	22.2618	21.7848	22.4331	22.1672	22.7783	22.2568	22.6001	22.4471	TRUE	0.0333447	0.662335	1.58264	TRUE	TRUE
Q9UK22	FBXO2	FBXO2 FBX2	F-box only protein 2	12	25.0446	25.056	24.9434	24.758	24.8582	24.932	25.0343	25.1073	25.0372	24.914	24.6825	24.955	TRUE	0.70517	0.0230156	1.01608			23.7462	25.0633	23.4276	23.4784	23.2731	23.7977	23.6404	24.6903	23.4171	23.5774	23.9279	23.8506	TRUE	0.770735	0.0528744	1.03733
Q99653	CHP1	CHP1 CHP	Calcineurin B homologous protein 1 (Calcineurin B-like protein) (Calcium-binding protein CHP) (Calcium-binding protein p22) (EF-hand calcium-binding domain-containing protein p22)	4	19.9833	19.7294	20.0547	19.9053	19.8321	19.9009	19.8592	19.8549	20.3224	19.9539	19.6292	19.9239	TRUE	0.799801	0.0229687	1.01605			19.0109	18.4355	19.3742	19.6682	18.8131	19.0604	18.7482	18.9016	18.8886	19.8211	18.7098	19.0139	TRUE	0.79205	-0.046534	0.96826
Q96P47	AGAP3	AGAP3 CENTG3	Arf-GAP with GTPase, ANK repeat and PH domain-containing protein 3 (AGAP-3) (CRAM-associated GTPase) (CRAG) (Centaurin-gamma-3) (Cnt-g3) (MR1-interacting protein) (MRIP-1)	8	24.0661	24.4738	23.3616	24.2212	23.7726	23.9791	23.7396	24.0963	24.0935	23.8182	24.2602	24.0016	TRUE	0.930674	0.0225151	1.01573			22.9874	22.2758	22.1732	22.8113	22.9126	22.6321	22.6798	22.3334	22.1243	22.3181	22.7176	22.4346	TRUE	0.110546	-0.197413	0.872113
P27338	MAOB	MAOB	Amine oxidase [flavin-containing] B (EC 1.4.3.4) (Monoamine oxidase type B) (MAO-B)	22	26.459	26.2084	26.8181	26.7679	25.7688	26.4044	26.1923	26.3451	26.8943	26.9904	25.7102	26.4265	TRUE	0.808995	0.0220692	1.01541			24.9325	26.4012	24.7283	24.685	25.0285	25.1551	25.4354	26.0491	25.0514	24.9393	24.9977	25.2946	TRUE	0.404847	0.139502	1.10153
P31040	SDHA	SDHA SDH2 SDHF	Succinate dehydrogenase [ubiquinone] flavoprotein subunit, mitochondrial (EC 1.3.5.1) (Flavoprotein subunit of complex II) (Fp)	17	25.5568	26.0047	25.1835	25.7615	25.749	25.6511	25.5989	25.6303	25.7593	25.5551	25.8222	25.6731	TRUE	0.897805	0.0220352	1.01539			24.7969	24.6209	25.0934	25.0107	24.7847	24.8613	24.6764	24.4238	24.9623	25.0213	24.816	24.78	TRUE	0.137536	-0.0813637	0.945164
O75340	PDCD6	PDCD6 ALG2	Programmed cell death protein 6 (Apoptosis-linked gene 2 protein homolog) (ALG-2)	5	22.4957	21.1031	23.0806	22.1418	22.1853	22.2013	22.874	22.7074	21.4532	22.5217	21.5583	22.2229	TRUE	0.970097	0.0216633	1.01513			21.6356	21.9219	21.4535	21.4448	21.6326	21.6177	21.6541	21.8288	21.3852	21.7739	21.7874	21.6859	TRUE	0.433045	0.068214	1.04842
Q92752	TNR	TNR	Tenascin-R (TN-R) (Janusin) (Restrictin)	36	27.9451	27.4223	27.7384	27.8149	28.0522	27.7946	27.8393	27.8652	27.527	27.8318	28.0149	27.8156	TRUE	0.86029	0.0210423	1.01469			26.9562	26.9532	26.7758	26.9469	27.1631	26.959	27.1461	26.754	26.7107	26.9647	27.0132	26.9177	TRUE	0.579877	-0.0412907	0.971785
Q9UIA9	XPO7	XPO7 KIAA0745 RANBP16	Exportin-7 (Exp7) (Ran-binding protein 16)	9	22.8526	23.2828	22.3895	23.2037	22.4123	22.8282	22.5737	22.937	22.7374	22.9906	23.0071	22.8492	TRUE	0.917021	0.0209785	1.01465			22.0171	21.674	21.5314	20.8953	21.9135	21.6063	21.2579	21.4609	21.55	21.2065	21.3542	21.3659	TRUE	0.280408	-0.240364	0.846532
P48556	PSMD8	PSMD8	26S proteasome non-ATPase regulatory subunit 8 (26S proteasome regulatory subunit RPN12) (26S proteasome regulatory subunit S14) (p31)	3	22.142	22.3065	22.2171	22.0487	22.2975	22.2024	21.9348	22.3447	22.2942	21.7669	22.7761	22.2233	TRUE	0.882794	0.0209721	1.01464			21.3913	21.0749	20.9698	21.4928	21.0759	21.2009	21.062	20.8451	21.0259	21.0348	20.9152	20.9766	TRUE	0.059765	-0.224334	0.85599
P49411	TUFM	TUFM	Elongation factor Tu, mitochondrial (EF-Tu) (P43)	21	26.9779	27.0273	27.1934	27.3569	27.0812	27.1273	26.8463	27.1564	27.362	27.2851	27.0876	27.1475	TRUE	0.742992	0.0201324	1.01405			25.9735	26.3033	26.1283	26.4254	26.0289	26.1719	26.0002	26.0353	26.3336	26.3472	25.949	26.1331	TRUE	0.642213	-0.0388092	0.973458
P14618	PKM	PKM OIP3 PK2 PK3 PKM2	Pyruvate kinase PKM (EC 2.7.1.40) (Cytosolic thyroid hormone-binding protein) (CTHBP) (Opa-interacting protein 3) (OIP-3) (Pyruvate kinase 2/3) (Pyruvate kinase muscle isozyme) (Thyroid hormone-binding protein 1) (THBP1) (Tumor M2-PK) (p58)	44	29.7201	29.3303	29.5622	29.2761	30.2048	29.6187	29.8568	29.4434	29.2783	29.3515	30.2613	29.6382	TRUE	0.812514	0.0195446	1.01364			28.9821	29.3323	29.1567	29.0186	29.1316	29.1243	29.4652	29.5018	29.2928	29.2068	29.359	29.3651	TRUE	0.0180795	0.240861	1.1817
P46783	RPS10	RPS10	40S ribosomal protein S10 (Small ribosomal subunit protein eS10)	4	22.1839	21.7498	21.1067	22.247	19.7413	21.4057	21.718	21.6591	21.3055	22.259	20.1846	21.4253	TRUE	0.903782	0.0195156	1.01362			19.4569	20.3457	20.4451	20.7088	21.1436	20.42	20.7567	20.426	20.5238	20.8864	20.9552	20.7096	TRUE	0.327353	0.289637	1.22233
P31323	PRKAR2B	PRKAR2B	cAMP-dependent protein kinase type II-beta regulatory subunit	15	25.019	24.8235	24.2981	24.7862	25.2553	24.8364	24.8473	25.2006	24.717	24.4987	25.0157	24.8559	TRUE	0.906641	0.0194534	1.01358			24.2459	23.5893	24.0692	24.5599	24.5809	24.209	23.9198	24.031	23.9105	24.3453	24.3186	24.105	TRUE	0.496492	-0.103988	0.930457
P60866	RPS20	RPS20	40S ribosomal protein S20 (Small ribosomal subunit protein uS10)	4	22.9127	23.1983	23.4753	23.0907	23.3058	23.1965	22.8761	23.0451	23.692	23.3343	23.1325	23.216	TRUE	0.838202	0.0194405	1.01357			22.2475	22.0709	22.8402	22.8202	22.0175	22.3993	21.7592	22.0255	22.396	22.1819	21.9949	22.0715	TRUE	0.0576687	-0.327748	0.796779
P61421	ATP6V0D1	ATP6V0D1 ATP6D VPATPD	V-type proton ATPase subunit d 1 (V-ATPase subunit d 1) (32 kDa accessory protein) (V-ATPase 40 kDa accessory protein) (V-ATPase AC39 subunit) (p39) (Vacuolar proton pump subunit d 1)	12	26.177	26.3116	25.1488	26.0176	26.0081	25.9326	26.1864	26.0557	25.8029	25.8184	25.8959	25.9519	TRUE	0.912544	0.0192833	1.01346			24.9706	24.5396	24.6283	24.7561	24.7614	24.7312	24.7992	24.6415	24.6825	24.6474	24.8265	24.7194	TRUE	0.837529	-0.0117901	0.991861
P14621	ACYP2	ACYP2 ACYP	Acylphosphatase-2 (EC 3.6.1.7) (Acylphosphatase, muscle type isozyme) (Acylphosphate phosphohydrolase 2)	9	24.448	24.5512	24.3289	24.3548	23.906	24.3178	24.2169	24.2704	24.9403	24.3189	23.9373	24.3368	TRUE	0.910748	0.0189938	1.01325			23.4207	24.2291	23.1476	22.9242	22.9685	23.338	23.2922	24.1072	23.5028	22.9186	22.8297	23.3301	TRUE	0.936647	-0.00794792	0.994506
Q15019	SEPTIN2	SEPTIN2 DIFF6 KIAA0158 NEDD5 SEPT2	Septin-2 (Neural precursor cell expressed developmentally down-regulated protein 5) (NEDD-5)	14	25.9072	25.6664	25.4116	25.9592	25.1745	25.6238	26.0031	25.7761	25.5777	25.9647	24.8879	25.6419	TRUE	0.832739	0.0181229	1.01264			24.7995	25.2233	24.7133	24.3504	24.9039	24.7981	24.9317	25.3518	24.7877	24.7686	25.0341	24.9748	TRUE	0.0450001	0.176706	1.1303
Q9Y4I1	MYO5A	MYO5A MYH12	Unconventional myosin-Va (Dilute myosin heavy chain, non-muscle) (Myosin heavy chain 12) (Myosin-12) (Myoxin)	41	26.0821	26.6684	25.6444	26.4917	26.2268	26.2227	25.882	26.3194	26.3094	26.2838	26.4083	26.2406	TRUE	0.927283	0.0178944	1.01248			25.348	24.6944	25.4506	25.649	25.3063	25.2897	25.2784	25.021	25.4384	25.5011	25.1409	25.276	TRUE	0.885747	-0.0136875	0.990557
P34932	HSPA4	HSPA4 APG2	Heat shock 70 kDa protein 4 (HSP70RY) (Heat shock 70-related protein APG-2)	21	23.8159	24.0045	23.2202	23.578	24.8435	23.8924	24.0066	23.7187	23.4538	23.4851	24.8864	23.9101	TRUE	0.86186	0.0176739	1.01233			24.0378	23.5829	23.545	23.3434	23.4488	23.5916	23.8949	23.7429	23.5745	23.6594	23.7097	23.7163	TRUE	0.20643	0.124693	1.09028
P00450	CP	CP	Ceruloplasmin (EC 1.16.3.1) (Ferroxidase)	7	19.968	19.8447	19.7927	19.8122	20.2866	19.9409	19.4563	21.4365	19.3626	20.0884	19.4472	19.9582		0.969996	0.0173527	1.0121			19.3875	20.9929	18.7596	18.1811	19.9844	19.4611	20.6844	20.2526	20.8166	18.9361	22.0991	20.5578	TRUE	0.104457	1.09665	2.13858			TRUE
[truncated: 1,282 more rows]

## Sheet: Table 2 - Unimputed Data
Supplementary Table 2 - Unimputed data
Unimputed LC-MS dataset for proteins present in plaques and neighboring non-plaque tissue in Down Syndrome (DS) and early onset AD (EOAD). This dataset was used to filter the imputed dataset to contain only those proteins present in at least 3 cases per group.
[truncated: 2,261 more rows]

## Sheet: Table 3 - Enriched in EOAD & DS
Supplementary Table 3 - Proteins enriched in plaques in both EOAD and DS (used to generate Figures 2 and 4)
[truncated: 51 more rows]

[truncated: 4 more sheets: Table 4 - Enriched in EOAD only, Table 5 - Enriched in DS only, Table 6 - Chr21 proteins, Table 7 - DS vs EOAD]
